# Supplementary material
Source: publisher figshare collection journal article supplement (https://gsajournals.figshare.com/ndownloader/files/26653091)
Supplement: Supplementary file 1 [file 26653091]

## Sheet: Table_S2
Table S2: Metrics output from REPET annotation of TEs.
TE consensus	Species	genome annotated	length	covg	frags	fullLgthFrags	copies	fullLgthCopies	meanId	sdId	minId	q25Id	medId	q75Id	maxId	meanLgth	sdLgth	minLgth	q25Lgth	medLgth	q75Lgth	maxLgth	meanLgthPerc	sdLgthPerc	minLgthPerc	q25LgthPerc	medLgthPerc	q75LgthPerc	maxLgthPerc
RXX-TRIM_Za17-B-G341-Map9	Z. ardabiliae	Za17	837	6899	13	4	12	5	83.54	14.14	61	71.2	88.75	96.2	98.3	574.92	313.3	42	324	757	835	868	68.69	37.43	5.02	38.71	90.44	99.76	103.7
RXX-TRIM_Za17-B-R129-Map4	Z. ardabiliae	Za17	587	2802	10	3	10	3	96.89	3.15	90	95.3	98.1	99.2	100	293.2	226.36	66	130	137.5	585	592	49.95	38.56	11.24	22.15	23.42	99.66	100.85
RIX-comp_Za17-B-G175-Map10_reversed	Z. ardabiliae	Za17	6576	21386	10	2	9	2	82.56	11.98	69.1	75.2	77.4	96.12	99.5	2376.22	2577.17	100	216	1906	2935	6584	36.13	39.19	1.52	3.28	28.98	44.63	100.12
RIX-comp_Za17-B-P16.16-Map3_reversed	Z. ardabiliae	Za17	5114	37586	18	4	17	4	89.29	4.81	80.2	86	88.2	91.7	98	2211.12	1995.02	211	405	1106	3455	5114	43.24	39.01	4.13	7.92	21.63	67.56	100
RIX-comp_Za17-B-R1-Map10_reversed	Z. ardabiliae	Za17	6523	30320	16	1	13	1	91.18	12.82	58.53	90	97.5	98.1	98.8	2332.31	2084.61	40	499	2288	3237	6517	35.76	31.96	0.61	7.65	35.08	49.62	99.91
RIX-incomp_Za17-B-R182-Map7_reversed	Z. ardabiliae	Za17	5002	19917	20	3	20	3	86.57	10.35	62.9	87.5	89.95	93.3	96.9	995.85	1703.49	42	79	245	1030	5031	19.91	34.06	0.84	1.58	4.9	20.59	100.58
RLX-comp_Za17-B-G196-Map20	Z. ardabiliae	Za17	7027	202735	46	21	43	24	94.18	8.27	58.2	96	97	97.5	98	4723.42	2958.17	21	1275	6975	6992	7032	67.22	42.1	0.3	18.14	99.26	99.5	100.07
RLX-comp_Za17-B-G270-Map3	Z. ardabiliae	Za17	14582	166897	41	3	29	5	92.02	5.85	75.4	89.4	94.8	96.5	97.8	5792.72	5629.36	24	787	4066	10499	14806	39.73	38.6	0.16	5.4	27.88	72	101.54
RLX-comp_Za17-B-R3-Map20_reversed	Z. ardabiliae	Za17	6324	101176	47	7	41	7	87.46	11.4	57.48	84.6	90	96.9	99.3	2471.59	2490.12	36	280	1210	5241	6283	39.08	39.38	0.57	4.43	19.13	82.87	99.35
RLX-comp_Za17-B-R4-Map20_reversed	Z. ardabiliae	Za17	12581	155958	38	2	29	6	92.01	7.81	68.4	91.8	94.5	97	98.5	5377.93	4720.85	34	435	4269	10800	12559	42.75	37.52	0.27	3.46	33.93	85.84	99.83
RLX-comp_Za17-B-R5-Map20_reversed	Z. ardabiliae	Za17	7292	753995	190	63	168	72	95.4	5.29	60.4	96.22	96.72	97.2	100	4488.31	2873.96	23	1305	5633	7261	7402	61.55	39.41	0.32	17.9	77.25	99.57	101.51
RLX-comp_Za17-B-R74-Map14	Z. ardabiliae	Za17	6810	57581	18	4	16	6	90.99	12.88	61.2	96.66	97.5	98.2	98.5	3599.5	2859.64	120	956	3392.5	6802	6905	52.86	41.99	1.76	14.04	49.82	99.88	101.4
RLX-incomp_Za17-B-G115-Map3	Z. ardabiliae	Za17	9335	12048	11	1	11	1	82.73	14.44	60.1	68.9	78.3	96.8	100	1095.27	2778.96	23	57	157	702	9435	11.73	29.77	0.25	0.61	1.68	7.52	101.07
RLX-incomp_Za17-B-G124-Map8_reversed	Z. ardabiliae	Za17	5208	40402	40	2	38	3	90.01	9.31	57.9	90	94.58	96.2	97.3	1063.21	1481.27	61	267	370.5	711	5143	20.41	28.44	1.17	5.13	7.11	13.65	98.75
RLX-incomp_Za17-B-G2-Map20	Z. ardabiliae	Za17	9019	31716	26	1	25	1	90.4	4.32	75.9	89	90.6	92.4	96.5	1270.24	1957.58	39	81	318	1545	8988	14.08	21.71	0.43	0.9	3.53	17.13	99.66
RLX-incomp_Za17-B-G216-Map4	Z. ardabiliae	Za17	8035	66972	19	4	18	5	94.19	5.07	79	90.9	96.34	96.9	98.1	3720.67	3316.88	24	867	2640	7882	8031	46.31	41.28	0.3	10.79	32.86	98.1	99.95
RLX-incomp_Za17-B-G220-Map9	Z. ardabiliae	Za17	8427	113412	47	7	44	7	86.72	10.65	57.3	80.1	89.45	96.5	98	2582.73	3173.9	39	227	1042.5	6239	8395	30.65	37.66	0.46	2.69	12.37	74.04	99.62
RLX-incomp_Za17-B-G23-Map17	Z. ardabiliae	Za17	17307	140773	48	1	37	1	92.37	5.94	72.5	90.2	94.1	96.8	100	3806.08	4745.73	24	253	1422	7039	17444	21.99	27.42	0.14	1.46	8.22	40.67	100.79
RLX-incomp_Za17-B-G255-Map20_reversed	Z. ardabiliae	Za17	14955	137369	39	3	28	4	94.79	3.98	76.7	95.1	95.87	96.7	97.4	4916.61	5922.45	24	395	1942.5	13816	15004	32.88	39.6	0.16	2.64	12.99	92.38	100.33
RLX-incomp_Za17-B-G263-Map7	Z. ardabiliae	Za17	12057	80184	14	5	13	5	88.98	13.19	67.3	77.8	97.2	98	98.5	6168	5448.86	23	427	6915	11807	12017	51.16	45.19	0.19	3.54	57.35	97.93	99.67
RLX-incomp_Za17-B-G265-Map4	Z. ardabiliae	Za17	12313	44400	13	1	11	3	91.5	5.24	82.1	85.4	94.5	95.06	97.4	4036.36	5401.75	34	223	504	12114	12341	32.78	43.87	0.28	1.81	4.09	98.38	100.23
RLX-incomp_Za17-B-G266-Map20_reversed	Z. ardabiliae	Za17	12286	131871	22	9	21	9	87.44	13.34	58.7	81.5	93.7	97.1	98.4	6280	5607.19	77	981	3559	12236	12477	51.12	45.64	0.63	7.98	28.97	99.59	101.55
RLX-incomp_Za17-B-G282-Map6_reversed	Z. ardabiliae	Za17	17898	1421494	245	1	202	3	94.67	8	55.6	95.56	96.72	97.79	100	7037.3	4980.04	21	1925	5960	11907	17917	39.32	27.82	0.12	10.76	33.3	66.53	100.11
RLX-incomp_Za17-B-G47-Map20	Z. ardabiliae	Za17	4593	7625	20	1	20	1	88.78	6.35	75.6	84.9	90.15	94	97.8	381.25	975.32	32	114	136.5	164	4490	8.3	21.23	0.7	2.48	2.97	3.57	97.76
RLX-incomp_Za17-B-G85-Map12	Z. ardabiliae	Za17	4866	37233	23	4	22	4	88.98	7.44	72.8	83.9	92.44	94.1	100	1692.41	1945.79	22	155	463	3722	4772	34.78	39.99	0.45	3.19	9.52	76.49	98.07
RLX-incomp_Za17-B-R11-Map20_reversed	Z. ardabiliae	Za17	11889	113140	20	5	16	7	89.92	14.39	56.9	94.77	96.95	97.5	97.8	7071.25	4900.05	91	3081	7983	11853	11961	59.48	41.21	0.77	25.91	67.15	99.7	100.61
RLX-incomp_Za17-B-R111-Map3_reversed	Z. ardabiliae	Za17	4694	22600	12	3	11	4	92.82	6.02	76.6	91.9	94.2	96.9	97	2054.55	2164.01	92	159	1155	4681	4718	43.77	46.1	1.96	3.39	24.61	99.72	100.51
RLX-incomp_Za17-B-R140-Map3_reversed	Z. ardabiliae	Za17	4636	28273	39	5	37	5	89.61	8.12	67.5	84.8	92.2	96.4	98.5	764.14	1569.16	26	30	106	320	4670	16.48	33.85	0.56	0.65	2.29	6.9	100.73
RLX-incomp_Za17-B-R158-Map7_reversed	Z. ardabiliae	Za17	7744	22205	40	1	38	1	86.62	7.21	72.4	81.4	86.75	91.7	99.3	584.34	1312.02	32	62	106.5	558	7741	7.55	16.94	0.41	0.8	1.38	7.21	99.96
RLX-incomp_Za17-B-R18-Map20	Z. ardabiliae	Za17	12382	132549	27	6	22	9	83.98	12.95	59.1	70.45	92.02	94.2	96	6024.95	5685.37	77	251	3117.5	12213	12244	48.66	45.92	0.62	2.03	25.18	98.64	98.89
RLX-incomp_Za17-B-R20-Map20_reversed	Z. ardabiliae	Za17	14812	447431	90	9	59	12	94.43	4.79	68.5	94.3	96.18	96.59	97.5	7585.1	5672.22	24	2071	7635	13894	14765	51.21	38.29	0.16	13.98	51.55	93.8	99.68
RLX-incomp_Za17-B-R29-Map10	Z. ardabiliae	Za17	5034	72019	45	4	39	7	86.44	7.89	68.3	81	89.5	91.9	98.6	1847.18	2088.82	22	156	432	4369	5504	36.69	41.49	0.44	3.1	8.58	86.79	109.34
RLX-incomp_Za17-B-R44-Map11_reversed	Z. ardabiliae	Za17	11577	66293	19	2	17	2	84.88	14.64	54.7	74.8	95.19	98.13	98.9	3901.53	4479.78	31	119	1594	6302	11536	33.7	38.7	0.27	1.03	13.77	54.44	99.65
DMX-incomp_Za17-B-G259-Map11	Z. ardabiliae	Za17	14051	55342	37	1	36	1	90.98	9.44	69.3	87	95.65	98.7	100	1537.28	2745.75	27	114	390.5	1559	14033	10.94	19.54	0.19	0.81	2.78	11.1	99.87
DMX-incomp_Za17-B-R36-Map20	Z. ardabiliae	Za17	20648	837369	91	18	88	19	95.82	6.52	72.7	97.5	98.3	98.6	99.2	9515.66	7823.78	50	2421	7511	17632	20460	46.09	37.89	0.24	11.73	36.38	85.39	99.09
DXX-MITE_Za17-B-G302-Map3	Z. ardabiliae	Za17	412	3156	11	7	11	7	83.47	13.15	67.4	68.9	86.4	95.5	99.5	286.91	178.77	44	53	411	418	422	69.64	43.39	10.68	12.86	99.76	101.46	102.43
DXX-MITE_Za17-B-G312-Map3	Z. ardabiliae	Za17	582	5762	17	5	14	6	88.47	6.64	76.5	82.64	88.2	93.99	98.1	411.57	226.43	41	169	538.5	591	623	70.72	38.91	7.04	29.04	92.53	101.55	107.04
DXX-MITE_Za17-B-G320-Map4	Z. ardabiliae	Za17	583	7756	33	8	33	8	86.71	8.65	69.5	79.4	87.7	95	98.3	235.03	251.94	40	40	87	582	733	40.31	43.21	6.86	6.86	14.92	99.83	125.73
DXX-MITE_Za17-B-P6.6-Map4	Z. ardabiliae	Za17	653	13918	23	18	23	18	97.78	1.07	93.5	97.7	97.8	98.5	98.8	605.13	104.78	210	638	646	647	652	92.67	16.05	32.16	97.7	98.93	99.08	99.85
DXX-MITE_Za17-B-R143-Map3	Z. ardabiliae	Za17	367	8274	42	6	41	6	84.45	5.68	75	81	83.7	88.1	100	201.8	90.13	35	130	187	250	372	54.99	24.56	9.54	35.42	50.95	68.12	101.36
DXX-MITE_Za17-B-R212-Map3	Z. ardabiliae	Za17	414	2614	17	3	17	3	88.22	5.77	79.6	84.3	87.2	91	100	153.76	139.04	40	56	92	165	414	37.14	33.58	9.66	13.53	22.22	39.86	100
DTX-comp_Za17-B-R147-Map3_reversed	Z. ardabiliae	Za17	2210	27944	32	6	29	8	77.64	8.52	64.1	71.4	77.2	80.2	98	963.59	870.1	22	194	662	2123	2250	43.6	39.37	1	8.78	29.95	96.06	101.81
DTX-incomp_Za17-B-G207-Map20	Z. ardabiliae	Za17	9926	78051	29	1	28	1	95.17	3.33	82.5	94.4	95.8	97	100	2787.54	3468.56	21	164	919	6632	9646	28.08	34.94	0.21	1.65	9.26	66.81	97.18
DTX-incomp_Za17-B-G261-Map19	Z. ardabiliae	Za17	13185	282625	72	9	65	13	92.03	8.13	72.3	91.4	96	97.6	100	4348.14	5341.43	27	100	447	10130	13061	32.98	40.51	0.2	0.76	3.39	76.83	99.06
DTX-incomp_Za17-B-G273-Map3	Z. ardabiliae	Za17	13023	73793	28	3	26	4	92.6	7.01	78.3	87.5	95.3	98.1	100	2838.58	4709.8	25	53	232.5	3311	13258	21.8	36.17	0.19	0.41	1.79	25.42	101.8
DTX-incomp_Za17-B-G393-Map3	Z. ardabiliae	Za17	1443	11130	11	7	10	7	80.47	12.48	71.3	71.7	73.47	98.3	98.8	1113	507.03	270	632	1402.5	1439	1443	77.13	35.14	18.71	43.8	97.19	99.72	100
DTX-incomp_Za17-B-P17.17-Map4	Z. ardabiliae	Za17	8213	61883	29	4	27	4	83.05	10.57	71.6	75.6	76.9	97.38	98.3	2292.33	3167.65	76	76	190	4279	8222	27.91	38.57	0.93	0.93	2.31	52.1	100.11
DTX-incomp_Za17-B-R107-Map5_reversed	Z. ardabiliae	Za17	1835	11281	11	2	9	4	92.24	4.3	84.3	89.5	92.4	94.9	97.9	1253.44	802.45	107	257	1734	1837	1855	68.31	43.73	5.83	14.01	94.5	100.11	101.09
DTX-incomp_Za17-B-R13-Map3_reversed	Z. ardabiliae	Za17	1719	8180	11	3	11	3	85.3	8.9	71.2	79.1	80.7	95.8	98	743.64	714.24	43	113	544	1711	1717	43.26	41.55	2.5	6.57	31.65	99.53	99.88
DTX-incomp_Za17-B-R166-Map7	Z. ardabiliae	Za17	3663	32170	24	2	22	3	82.8	11.38	67.5	74	77.75	97.8	98.9	1462.27	1328.61	52	177	1240	2391	3750	39.92	36.27	1.42	4.83	33.85	65.27	102.38
DTX-incomp_Za17-B-R17-Map3	Z. ardabiliae	Za17	3036	15435	21	2	21	2	78.94	8.45	69.5	73.4	75.7	82.3	97.3	735	891.81	72	127	275	1019	3073	24.21	29.37	2.37	4.18	9.06	33.56	101.22
DTX-incomp_Za17-B-R177-Map3_reversed	Z. ardabiliae	Za17	1539	15184	12	7	12	7	79.62	9.99	68.6	75.4	76.25	85.1	100	1265.33	431.85	100	1190	1473	1539	1546	82.22	28.06	6.5	77.32	95.71	100	100.45
DTX-incomp_Za17-B-R201-Map3	Z. ardabiliae	Za17	1090	15471	39	3	39	3	79.52	6.77	69.7	75.2	78.2	80.7	98.5	396.69	349.33	82	131	270	509	1186	36.39	32.05	7.52	12.02	24.77	46.7	108.81
DTX-incomp_Za17-B-R225-Map4_reversed	Z. ardabiliae	Za17	3080	19618	51	1	51	1	88.68	5.62	72.4	85.9	88.4	93	98.9	384.67	583.52	38	134	198	400	3096	12.49	18.95	1.23	4.35	6.43	12.99	100.52
DTX-incomp_Za17-B-R252-Map4	Z. ardabiliae	Za17	3234	72175	71	11	61	14	79.21	6.46	61.3	75.4	78.09	82.1	97.8	1183.2	1338.36	31	89	297	3050	3263	36.59	41.38	0.96	2.75	9.18	94.31	100.9
DTX-incomp_Za17-B-R300-Map4_reversed	Z. ardabiliae	Za17	2958	18610	33	2	30	3	80.83	7.18	71.9	75.8	78.45	83.5	99	620.33	1006.73	22	96	150	325	2948	20.97	34.03	0.74	3.25	5.07	10.99	99.66
DTX-incomp_Za17-B-R34-Map4_reversed	Z. ardabiliae	Za17	2163	24569	19	6	19	6	83.06	8.84	72.2	77	78.8	92	98.5	1293.11	818.47	22	665	1060	2141	2197	59.78	37.84	1.02	30.74	49.01	98.98	101.57
DTX-incomp_Za17-B-R56-Map7	Z. ardabiliae	Za17	2385	27871	31	2	28	3	83.6	11.66	65.9	73.98	79.17	98.3	100	995.39	800.09	21	185	1052	1785	2376	41.74	33.55	0.88	7.76	44.11	74.84	99.62
DTX-incomp_Za17-B-R72-Map5	Z. ardabiliae	Za17	3349	34655	25	8	25	8	80.12	9.14	65.8	74.7	78.2	83.5	98.6	1386.2	1505.24	35	164	306	3309	3413	41.39	44.95	1.05	4.9	9.14	98.81	101.91
DTX-incomp_Za17-B-R95-Map3	Z. ardabiliae	Za17	2360	14660	12	3	11	4	82.19	11.61	71.1	73	75.99	95.5	100	1332.73	979.62	159	299	1763	2354	2360	56.47	41.51	6.74	12.67	74.7	99.75	100
noCat_Za17-B-G272-Map20	Z. ardabiliae	Za17	12744	26377	11	1	11	1	94.11	5.77	86.6	87.1	96.2	100	100	2397.91	4672.03	35	115	281	660	12737	18.82	36.66	0.27	0.9	2.2	5.18	99.95
noCat_Za17-B-G299-Map20	Z. ardabiliae	Za17	393	4000	16	4	16	4	84.76	12.94	69.8	71.3	87	97.2	99.4	250	103.57	118	162	252	374	387	63.61	26.35	30.03	41.22	64.12	95.17	98.47
noCat_Za17-B-R138-Map12	Z. ardabiliae	Za17	3762	52445	48	4	48	4	82.44	9.41	69	73.5	79.25	91.5	98.4	1092.6	975.89	70	713	830.5	1036	3785	29.04	25.94	1.86	18.95	22.08	27.54	100.61
noCat_Za17-B-R142-Map18	Z. ardabiliae	Za17	18442	299464	116	1	103	1	87.56	10.45	69	78.3	86.1	97.8	100	2915.8	4326.64	21	273	525	3769	18044	15.81	23.46	0.11	1.48	2.85	20.44	97.84
noCat_Za17-B-R6-Map17	Z. ardabiliae	Za17	5996	34453	25	2	23	2	84.39	13.14	66.7	70.2	92.3	96.9	98.7	1499.78	1873.96	21	93	571	2832	6131	25.01	31.25	0.35	1.55	9.52	47.23	102.25
RXX_Zb87-B-G294-Map4	Z. brevis	Zb87	6277	53275	12	6	9	8	91.82	1.48	89.7	91.1	91.5	92.84	94.1	5919.44	991.51	3278	6214	6235	6268	6343	94.3	15.8	52.22	99	99.33	99.86	101.05
RXX-LARD_Zb87-B-G462-Map3	Z. brevis	Zb87	12343	350749	201	1	176	1	89.48	8.42	71.8	79.3	94.05	96.7	99.3	1993.2	2555.79	58	206	610	2689	12327	16.15	20.71	0.47	1.67	4.94	21.79	99.87
RXX-LARD_Zb87-B-G72-Map10	Z. brevis	Zb87	3355	15177	8	2	8	2	87.8	10.44	73.5	79.4	92.65	96.2	98.1	1897.12	1758.55	113	294	1915	3594	3629	56.55	52.42	3.37	8.76	57.08	107.12	108.17
RXX-TRIM_Zb87-B-G621-Map3	Z. brevis	Zb87	899	1377	3	1	3	1	93.8	8.66	83.9	83.9	97.5	100	100	459	440.12	33	33	432	912	912	51.06	48.96	3.67	3.67	48.05	101.45	101.45
RXX-TRIM_Zb87-B-R174-Map5	Z. brevis	Zb87	664	24091	93	2	90	2	84.86	6.35	70.74	81.2	84.75	88	100	268.47	123.48	40	176	316.5	334	726	40.43	18.6	6.02	26.51	47.67	50.3	109.34
RXX-TRIM_Zb87-B-R186-Map5	Z. brevis	Zb87	534	2832	6	5	6	5	97.47	0.45	97	97.2	97.35	97.6	98.3	472	144.36	178	514	531	535	543	88.39	27.03	33.33	96.25	99.44	100.19	101.69
RIX-comp_Zb87-B-G324-Map4_reversed	Z. brevis	Zb87	6636	385117	100	1	94	2	94.31	4.76	69.4	95.1	95.55	95.8	97.3	4314.31	1693.04	48	5086	5107	5116	6718	65.01	25.51	0.72	76.64	76.96	77.09	101.24
RIX-comp_Zb87-B-G432-Map3	Z. brevis	Zb87	10201	38965	12	2	9	2	93.45	2.18	90	92.2	93.9	94.4	97.4	4333.11	3799.96	21	780	5102	5106	10188	42.48	37.25	0.21	7.65	50.01	50.05	99.87
RIX-comp_Zb87-B-G478-Map3	Z. brevis	Zb87	19780	207498	44	1	35	1	95.02	3.52	80.3	94.8	95.93	97	98.5	5929.11	6136.91	23	467	5109	13863	19885	29.98	31.03	0.12	2.36	25.83	70.09	100.53
RIX-comp_Zb87-B-G55-Map5_reversed	Z. brevis	Zb87	6961	140239	99	1	94	2	94.08	3.99	68	94	95	95.8	97.8	1492.86	2119.63	27	180	231.5	1844	7136	21.45	30.45	0.39	2.59	3.33	26.49	102.51
RIX-incomp_Zb87-B-G236-Map9	Z. brevis	Zb87	5285	12972	13	1	13	1	93.37	6.42	74	93.6	95	95.5	99.3	997.85	1388.82	49	156	556	1123	5285	18.88	26.28	0.93	2.95	10.52	21.25	100
RIX-incomp_Zb87-B-G261-Map3	Z. brevis	Zb87	5680	50252	23	3	21	4	90.25	5.39	77.5	88.5	91.2	94.69	96.8	2392.95	2285.56	49	599	929	5377	5547	42.13	40.24	0.86	10.55	16.36	94.67	97.66
RIX-incomp_Zb87-B-G293-Map10	Z. brevis	Zb87	5921	64241	26	3	23	3	93.83	4.95	73.4	93.7	94.8	96.5	97.1	2793.09	2508.88	164	544	928	5492	5838	47.17	42.37	2.77	9.19	15.67	92.75	98.6
RIX-incomp_Zb87-B-G372-Map20	Z. brevis	Zb87	5207	247289	62	47	62	47	98.07	3.13	86.2	98.1	99.2	99.6	100	3988.53	2091.52	21	5090	5115.5	5146	5192	76.6	40.17	0.4	97.75	98.24	98.83	99.71
RIX-incomp_Zb87-B-G442-Map4	Z. brevis	Zb87	8828	55817	19	2	17	2	95.57	6.61	76.8	96.3	98.7	99.3	100	3283.35	3157.85	32	125	3732	5097	8870	37.19	35.77	0.36	1.42	42.27	57.74	100.48
RIX-incomp_Zb87-B-R321-Map5	Z. brevis	Zb87	5836	15534	10	2	10	2	90.3	8.93	75.5	82.5	94.85	96.4	98.2	1553.4	2198.99	49	145	924	979	5709	26.62	37.68	0.84	2.48	15.83	16.78	97.82
RLX-comp_Zb87-B-G381-Map20_reversed	Z. brevis	Zb87	7063	94321	39	8	38	8	94.74	3.07	83.2	94.3	95.75	96.4	97.7	2489.39	2830.09	24	266	444	6586	7028	35.25	40.07	0.34	3.77	6.29	93.25	99.5
RLX-comp_Zb87-B-G420-Map6_reversed	Z. brevis	Zb87	13576	477737	239	3	178	5	90.52	5.36	75.1	85.1	92.81	94.6	100	2689.01	3641.68	21	353	839	3360	13575	19.81	26.82	0.15	2.6	6.18	24.75	99.99
RLX-comp_Zb87-B-R1-Map20	Z. brevis	Zb87	6878	164612	63	15	58	18	94.56	5.22	70.6	95	96	96.8	98.6	2851.71	2977.81	62	294	870	6849	6881	41.46	43.29	0.9	4.27	12.65	99.58	100.04
RLX-comp_Zb87-B-R37-Map20	Z. brevis	Zb87	6907	247033	69	1900-01-25	58	30	93.6	6.61	54.5	94.6	95.5	96.1	98.8	4265	2987.82	22	680	6568	6893	7167	61.75	43.26	0.32	9.85	95.09	99.8	103.76
RLX-incomp_Zb87-B-G10-Map20_reversed	Z. brevis	Zb87	11189	51940	37	1	32	1	88.01	6.67	74.7	83.5	86.85	95	98.3	1627.09	3224.98	22	97	178.5	1044	10743	14.54	28.82	0.2	0.87	1.6	9.33	96.01
RLX-incomp_Zb87-B-G14-Map6	Z. brevis	Zb87	6572	13576	7	1	6	1	88.73	4.49	83.2	84.1	89.57	92	93.9	2262.67	2199.1	194	975	1688	2595	6436	34.43	33.46	2.95	14.84	25.68	39.49	97.93
RLX-incomp_Zb87-B-G190-Map20	Z. brevis	Zb87	4796	61964	28	7	20	9	83.7	6.43	70.5	82.39	84.5	86.44	95.7	3098.4	2130.05	106	866	4494.5	4841	5471	64.6	44.41	2.21	18.06	93.71	100.94	114.07
RLX-incomp_Zb87-B-G26-Map20	Z. brevis	Zb87	13408	103170	109	1	97	1	93.84	5.19	70.95	92.33	95.7	97.1	100	1065.46	2617.72	21	163	180	246	13537	7.95	19.52	0.16	1.22	1.34	1.83	100.96
RLX-incomp_Zb87-B-G291-Map16_reversed	Z. brevis	Zb87	5200	27071	7	5	7	5	90.39	11.06	70.6	78.5	96.7	96.7	97	3867.29	2267.56	118	1022	5188	5192	5194	74.37	43.61	2.27	19.65	99.77	99.85	99.88
RLX-incomp_Zb87-B-G319-Map7_reversed	Z. brevis	Zb87	6275	118648	59	9	50	14	88.11	4.53	77	84.9	89.35	90.9	96.8	2372.96	2639.89	47	229	729.5	6083	6248	37.82	42.07	0.75	3.65	11.63	96.94	99.57
RLX-incomp_Zb87-B-G33-Map20_reversed	Z. brevis	Zb87	7439	10915	11	1	11	1	86.42	8.55	73.6	75.4	88.1	94.8	95.4	992.27	2079.68	28	115	339	400	7133	13.34	27.96	0.38	1.55	4.56	5.38	95.89
RLX-incomp_Zb87-B-G330-Map14_reversed	Z. brevis	Zb87	5436	49578	11	7	10	8	93.67	8.49	69.6	95.4	96.4	96.8	97.4	4957.8	1564.96	522	5347	5433.5	5468	5781	91.2	28.79	9.6	98.36	99.95	100.59	106.35
RLX-incomp_Zb87-B-G351-Map3	Z. brevis	Zb87	7033	65220	30	2	26	2	92.51	4.98	81.5	88.8	93.1	97.3	98.8	2508.54	2271.93	21	1237	1620	4056	7130	35.67	32.3	0.3	17.59	23.03	57.67	101.38
RLX-incomp_Zb87-B-G370-Map5	Z. brevis	Zb87	8597	58577	43	1900-01-01	38	1	91.56	8.08	64.3	92.2	94.54	95.7	100	1541.5	1936.78	33	176	794.5	2194	8592	17.93	22.53	0.38	2.05	9.24	25.52	99.94
RLX-incomp_Zb87-B-G40-Map20_reversed	Z. brevis	Zb87	6374	300709	75	30	66	35	94.79	3.35	84.7	95.2	96	96.4	97.26	4556.42	2367.59	30	1386	6351.5	6367	6745	71.48	37.14	0.47	21.74	99.65	99.89	105.82
RLX-incomp_Zb87-B-G433-Map3	Z. brevis	Zb87	13119	198502	84	1	53	2	90.06	10.73	57.9	86.8	94.3	96	100	3745.64	3628.19	21	209	2990	6430	13152	28.55	27.66	0.16	1.59	22.79	49.01	100.25
RLX-incomp_Zb87-B-G443-Map12	Z. brevis	Zb87	10158	55068	23	1	19	1	89.48	3.61	82.4	86.6	89.6	92.4	95.5	2898.32	3111.66	78	424	1924	4501	9870	28.53	30.63	0.77	4.17	18.94	44.31	97.16
RLX-incomp_Zb87-B-G446-Map3_reversed	Z. brevis	Zb87	11030	79181	21	1	18	2	90.41	7.17	75.4	84.77	94.5	95.5	98.3	4399.44	3633.9	62	343	4573.5	6463	11363	39.89	32.95	0.56	3.11	41.46	58.59	103.02
RLX-incomp_Zb87-B-G449-Map20_reversed	Z. brevis	Zb87	12386	430853	117	8	85	19	92.71	4.1	73.9	92.6	94.1	94.6	98	5079.72	5045.24	23	258	3118	11520	12536	41.01	40.73	0.19	2.08	25.17	93.01	101.21
RLX-incomp_Zb87-B-G469-Map4_reversed	Z. brevis	Zb87	14233	1133854	332	1	243	3	93.37	5.52	55.92	93.1	94.8	95.9	99.2	4667.22	3695.93	43	403	6695	7144	14136	32.79	25.97	0.3	2.83	47.04	50.19	99.32
RLX-incomp_Zb87-B-G50-Map20	Z. brevis	Zb87	6039	209983	106	18	81	21	93.1	5.83	77.8	88.9	95.8	97.9	98.7	2592.6	2348.46	22	473	1916	5914	6041	42.93	38.89	0.36	7.83	31.73	97.93	100.03
RLX-incomp_Zb87-B-G574-Map5_reversed	Z. brevis	Zb87	802	6698	32	2	32	2	86.89	7.66	70.7	84.6	88.3	92.6	97.8	209.31	158.32	53	158	170.5	179	801	26.1	19.74	6.61	19.7	21.26	22.32	99.88
RLX-incomp_Zb87-B-G65-Map20	Z. brevis	Zb87	6796	245617	98	14	85	19	94.13	5.96	74.2	95.5	96.2	96.6	98.1	2890.76	2464.22	35	703	2173	4518	6806	42.54	36.26	0.52	10.34	31.97	66.48	100.15
RLX-incomp_Zb87-B-P21.38-Map3_reversed	Z. brevis	Zb87	9416	84148	27	4	24	5	92.33	7.03	73.6	86.1	96.55	96.98	98.3	3506.17	3724.92	89	458	1406.5	7070	9444	37.24	39.56	0.95	4.86	14.94	75.08	100.3
RLX-incomp_Zb87-B-R104-Map20	Z. brevis	Zb87	12519	192352	50	4	40	8	89.72	8.15	60.1	86.1	93.2	95.23	98.3	4808.8	5094.6	23	324	2257.5	11420	12671	38.41	40.69	0.18	2.59	18.03	91.22	101.21
RLX-incomp_Zb87-B-R108-Map20	Z. brevis	Zb87	5573	142776	45	14	39	18	93.94	4.45	77	91.72	96.3	96.8	97	3660.92	2191.49	138	992	5218	5555	5891	65.69	39.32	2.48	17.8	93.63	99.68	105.71
RLX-incomp_Zb87-B-R11-Map8_reversed	Z. brevis	Zb87	3908	18373	19	1900-01-02	19	2	89.85	8.88	67.6	88.6	92.8	95.5	97.1	967	1248.12	55	171	360	1423	3904	24.74	31.94	1.41	4.38	9.21	36.41	99.9
RLX-incomp_Zb87-B-R115-Map5_reversed	Z. brevis	Zb87	13730	67212	18	2	12	3	78.57	14.11	56.73	69.3	75.4	96.9	99.3	5601	5474.54	282	1474	3404	13695	13788	40.79	39.87	2.05	10.74	24.79	99.75	100.42
RLX-incomp_Zb87-B-R12-Map13	Z. brevis	Zb87	11992	65065	21	2	18	2	86.47	10.77	67.4	75.8	90.9	96.2	97.2	3614.72	4385.77	48	121	1413.5	5311	11931	30.14	36.57	0.4	1.01	11.79	44.29	99.49
RLX-incomp_Zb87-B-R122-Map15	Z. brevis	Zb87	11818	76178	16	3	12	4	93.55	7.3	71.7	94.8	96.5	96.9	97.3	6348.17	5139.54	26	2129	5971	11803	11994	53.72	43.49	0.22	18.01	50.52	99.87	101.49
RLX-incomp_Zb87-B-R139-Map11	Z. brevis	Zb87	6080	58674	44	4	43	4	89.64	5.9	68.5	85.4	91.1	93.7	96.9	1364.51	1926.89	25	210	271	1556	6099	22.44	31.69	0.41	3.45	4.46	25.59	100.31
RLX-incomp_Zb87-B-R142-Map10_reversed	Z. brevis	Zb87	5338	47120	37	5	32	6	89.04	8.23	63.9	85.5	91.45	95.9	98.8	1472.84	2020.36	32	154	218.5	2781	5525	27.59	37.85	0.6	2.88	4.09	52.1	103.5
RLX-incomp_Zb87-B-R189-Map3	Z. brevis	Zb87	1698	3003	5	1	5	1	90.1	4.71	85	85.9	91.4	91.7	96.5	600.6	661.28	94	232	304	647	1726	35.37	38.94	5.54	13.66	17.9	38.1	101.65
RLX-incomp_Zb87-B-R202-Map4_reversed	Z. brevis	Zb87	5740	22608	16	1	14	1	91.97	7.94	73.6	86	96.22	98.47	98.8	1614.86	1915.65	21	125	1043.5	2276	5740	28.13	33.37	0.37	2.18	18.18	39.65	100
RLX-incomp_Zb87-B-R23-Map20	Z. brevis	Zb87	7088	479123	125	48	114	55	94.85	3.22	80.9	94.1	95.8	97	98.4	4270.17	2920.27	34	982	5200	7077	7089	60.25	41.2	0.48	13.85	73.36	99.84	100.01
RLX-incomp_Zb87-B-R245-Map4	Z. brevis	Zb87	5025	51707	29	2	25	2	79.77	10.46	62.2	74	75.2	87.1	97.4	2068.28	1966.59	31	267	862	4296	5035	41.16	39.14	0.62	5.31	17.15	85.49	100.2
RLX-incomp_Zb87-B-R280-Map8_reversed	Z. brevis	Zb87	4938	8906	8	1900-01-01	7	1	84.63	13.03	67.9	68.7	89.6	96.3	97	1272.29	1661.77	266	270	924	1137	4932	25.77	33.65	5.39	5.47	18.71	23.03	99.88
RLX-incomp_Zb87-B-R38-Map18_reversed	Z. brevis	Zb87	12216	108925	19	6	16	7	91.74	9.08	70	95	96.25	97.1	98.1	6809.62	5243.92	72	2651	6554	12191	12210	55.74	42.93	0.59	21.7	53.65	99.8	99.95
RLX-incomp_Zb87-B-R386-Map4	Z. brevis	Zb87	4427	8975	7	1	6	1	88.72	7.58	79.6	81.8	88.05	95.9	98.9	1495.83	2005.12	49	53	379	3688	4427	33.79	45.29	1.11	1.2	8.56	83.31	100
RLX-incomp_Zb87-B-R432-Map3	Z. brevis	Zb87	4880	27031	19	3	16	3	76.54	12.14	57.6	68.8	72	90.8	97.4	1689.56	1824.48	21	464	641.5	3560	4881	34.62	37.39	0.43	9.51	13.15	72.95	100.02
RLX-incomp_Zb87-B-R87-Map6	Z. brevis	Zb87	3138	3700	7	1	7	1	87.53	8	71.7	83.2	89.3	93.2	94.8	528.57	1128.39	66	72	106	179	3086	16.84	35.96	2.1	2.29	3.38	5.7	98.34
RLX-incomp_Zb87-B-R9-Map20_reversed	Z. brevis	Zb87	7079	434396	103	43	91	51	95.25	2.44	77.9	95.1	95.7	96.2	97	4800.54	2772.15	22	2116	6990	7040	7082	67.81	39.16	0.31	29.89	98.74	99.45	100.04
DHX-incomp_Zb87-B-G429-Map7	Z. brevis	Zb87	8138	72730	33	6	32	6	78.23	9.85	54.6	72.7	76.36	84.3	98.2	2272.81	3363.17	48	140	269	7573	8163	27.93	41.33	0.59	1.72	3.31	93.06	100.31
DHX-incomp_Zb87-B-G439-Map3_reversed	Z. brevis	Zb87	8337	102735	40	5	34	8	86.72	9.34	64.25	84.4	89.65	93.5	98.6	3021.62	3702.73	31	55	513	7851	8391	36.24	44.41	0.37	0.66	6.15	94.17	100.65
DHX-incomp_Zb87-B-G441-Map3	Z. brevis	Zb87	8505	79376	31	8	28	8	84.89	10.08	66.3	77.2	87.5	91.7	98.6	2834.86	3866.62	27	74	345	8357	8540	33.33	45.46	0.32	0.87	4.06	98.26	100.41
DHX-incomp_Zb87-B-P28.31-Map4	Z. brevis	Zb87	8027	64897	48	7	48	7	90.02	6.68	74.7	85.4	89.7	94.7	100	1352.02	2959.88	25	38	41	69	8088	16.84	36.87	0.31	0.47	0.51	0.86	100.76
DHX-incomp_Zb87-B-R273-Map5	Z. brevis	Zb87	7308	29394	28	2	26	2	77.93	11.33	59.43	67.9	77.6	88.9	99.4	1134.38	2264.43	100	171	277	485	7672	15.52	30.99	1.37	2.34	3.79	6.64	104.98
DMX-incomp_Zb87-B-G268-Map20	Z. brevis	Zb87	11710	89778	33	5	30	5	86.91	9.71	68.3	78.4	91.65	95.3	96.4	2992.6	4562.21	28	84	346.5	3559	11635	25.56	38.96	0.24	0.72	2.96	30.39	99.36
DMX-incomp_Zb87-B-G419-Map20	Z. brevis	Zb87	13273	34944	14	1	14	1	96.88	0.78	95.1	96.4	97.2	97.4	97.7	2496	3401.7	269	1070	1380.5	1383	13227	18.81	25.63	2.03	8.06	10.4	10.42	99.65
DMX-incomp_Zb87-B-R24-Map20	Z. brevis	Zb87	16518	669490	69	30	61	35	95.67	4.17	68.8	95.8	96.4	96.7	100	10975.3	6831.02	28	2093	15901	16172	16516	66.44	41.35	0.17	12.67	96.26	97.91	99.99
DMX-incomp_Zb87-B-R25-Map7	Z. brevis	Zb87	17264	379922	63	4	32	6	95.21	1.54	90.6	94.77	95.53	96.4	97	11873.6	5483.04	49	8497	15210	16003	17286	68.78	31.76	0.28	49.22	88.1	92.7	100.13
DXX_Zb87-B-G85-Map20_reversed	Z. brevis	Zb87	5164	51559	92	1	87	1	94.38	9.16	71.9	89.7	100	100	100	605.21	911.95	24	72	89	748	4943	11.72	17.66	0.46	1.39	1.72	14.48	95.72
DXX_Zb87-B-R213-Map10	Z. brevis	Zb87	6913	27305	12	1900-01-02	12	2	93.7	2.62	90.5	92.1	93.8	95.3	100	2275.42	2781.44	23	43	840	6285	6921	32.92	40.23	0.33	0.62	12.15	90.92	100.12
DXX_Zb87-B-R345-Map13_reversed	Z. brevis	Zb87	15079	180868	96	5	94	7	79.67	7.53	66.8	74.7	76.8	81.3	97.6	1924.13	4488.94	24	142	142	169	15218	12.76	29.77	0.16	0.94	0.94	1.12	100.92
DXX-MITE_Zb87-B-G533-Map3	Z. brevis	Zb87	516	6595	26	4	25	4	85.15	6.53	75.3	79.9	85.9	88.3	100	263.88	166.98	64	112	161	394	519	51.14	32.36	12.4	21.71	31.2	76.36	100.58
DXX-MITE_Zb87-B-G586-Map5	Z. brevis	Zb87	660	3810	7	5	7	5	91.49	9.89	76.2	78	96.5	98.5	98.5	544.29	208.68	102	453	652	656	659	82.47	31.62	15.45	68.64	98.79	99.39	99.85
DXX-MITE_Zb87-B-P0.52-Map4	Z. brevis	Zb87	436	1432	5	3	5	3	92.58	9.62	82	82.1	99.3	99.5	100	286.4	203.03	63	65	433	435	436	65.69	46.57	14.45	14.91	99.31	99.77	100
DXX-MITE_Zb87-B-P29.30-Map4	Z. brevis	Zb87	345	6076	36	4	36	4	85.29	7.54	74.1	79.3	82.1	92	100	168.78	82.13	43	109	165.5	184	345	48.92	23.81	12.46	31.59	47.97	53.33	100
DXX-MITE_Zb87-B-P3.50-Map5	Z. brevis	Zb87	369	3996	12	8	12	8	94.03	6.97	78.5	93.7	96.05	99.7	100	333	84.25	82	350	364.5	368	385	90.24	22.83	22.22	94.85	98.78	99.73	104.34
DXX-MITE_Zb87-B-P46.14-Map4	Z. brevis	Zb87	640	3270	7	4	7	4	96.86	2	94.7	94.8	96.4	98.4	100	467.14	232.4	84	221	630	639	639	72.99	36.31	13.12	34.53	98.44	99.84	99.84
DXX-MITE_Zb87-B-R160-Map3	Z. brevis	Zb87	474	2331	6	3	5	3	94.98	3.08	90	95.3	95.5	95.6	98.5	466.8	44.51	399	467	472	472	524	98.48	9.39	84.18	98.52	99.58	99.58	110.55
DTX-comp_Zb87-B-G157-Map10_reversed	Z. brevis	Zb87	3356	20429	14	3	14	3	94.66	4.83	82.3	91.5	97.1	97.6	98.2	1459.21	1301.09	63	380	732	2488	3355	43.48	38.77	1.88	11.32	21.81	74.14	99.97
DTX-comp_Zb87-B-G195-Map3_reversed	Z. brevis	Zb87	3371	25103	22	5	21	6	81.91	10.65	69.8	73.1	76	92.5	98.7	1195.38	1439.86	50	53	230	3260	3388	35.46	42.71	1.48	1.57	6.82	96.71	100.5
DTX-comp_Zb87-B-G215-Map5_reversed	Z. brevis	Zb87	3445	17415	6	5	6	5	93.13	9.68	73.8	93	97.9	98.1	98.1	2902.5	1325.42	197	3441	3441	3445	3450	84.25	38.47	5.72	99.88	99.88	100	100.15
DTX-comp_Zb87-B-G278-Map6_reversed	Z. brevis	Zb87	4323	27477	16	5	15	6	88.35	10.45	69.8	80	94.4	97.5	100	1831.8	2095.87	25	101	160	4296	4321	42.37	48.48	0.58	2.34	3.7	99.38	99.95
DTX-comp_Zb87-B-P10.45-Map11_reversed	Z. brevis	Zb87	2197	32838	18	12	15	15	91.78	7.58	76.8	82.49	96.3	96.6	97.2	2189.2	14.91	2143	2191	2193	2194	2207	99.64	0.68	97.54	99.73	99.82	99.86	100.46
DTX-comp_Zb87-B-P11.19-Map3	Z. brevis	Zb87	2983	11056	7	3	7	3	91.9	9.03	73.5	86.8	96.6	97.7	97.8	1579.43	1466.44	30	61	1918	2982	2982	52.95	49.16	1.01	2.04	64.3	99.97	99.97
DTX-comp_Zb87-B-P27.32-Map7	Z. brevis	Zb87	2170	19586	11	7	10	8	94.24	6.37	77.8	95.88	96.75	97.2	98.3	1958.6	556.59	398	2163	2164	2167	2172	90.26	25.65	18.34	99.68	99.72	99.86	100.09
DTX-comp_Zb87-B-P36.24-Map3	Z. brevis	Zb87	2193	13303	8	5	7	6	89.35	7.44	81.8	83.9	84.1	98	98.3	1900.43	763.5	169	2184	2189	2192	2193	86.66	34.82	7.71	99.59	99.82	99.95	100
DTX-comp_Zb87-B-P41.19-Map4_reversed	Z. brevis	Zb87	2981	21430	15	4	10	7	88.33	9.79	72.5	78.7	89.97	96.9	98.7	2143	1352.01	115	282	2978.5	2981	2994	71.89	45.35	3.86	9.46	99.92	100	100.44
DTX-comp_Zb87-B-P45.15-Map3	Z. brevis	Zb87	3530	31800	28	5	25	6	78.09	12.38	58	70.4	72.5	91.6	98.4	1272	1378.84	28	457	511	2222	3567	36.03	39.06	0.79	12.95	14.48	62.95	101.05
DTX-comp_Zb87-B-R118-Map7	Z. brevis	Zb87	2198	25995	26	5	21	8	84.63	8.79	68.9	79.29	81.36	95.8	97.9	1238.05	922.19	28	310	1511	2189	2220	56.33	41.96	1.27	14.1	68.74	99.59	101
DTX-comp_Zb87-B-R131-Map7	Z. brevis	Zb87	3289	32282	23	1900-01-05	21	6	82.61	10.67	64.1	74.4	79.33	94	98.5	1537.24	1364.69	59	188	1181	3238	3371	46.74	41.49	1.79	5.72	35.91	98.45	102.49
DTX-comp_Zb87-B-R178-Map11_reversed	Z. brevis	Zb87	3508	12572	9	2	9	2	93.51	8.12	73.1	92.9	96	98.6	99.3	1396.89	1290.64	313	525	789	1964	3513	39.82	36.79	8.92	14.97	22.49	55.99	100.14
DTX-comp_Zb87-B-R198-Map6	Z. brevis	Zb87	3584	17990	6	5	6	5	95.95	3.58	89.2	94.6	97.75	98.2	98.2	2998.33	1410.17	120	3544	3579	3584	3584	83.66	39.35	3.35	98.88	99.86	100	100
DTX-comp_Zb87-B-R205-Map5	Z. brevis	Zb87	2154	10568	9	2	9	2	91.01	9.4	72.8	90.3	93.6	97.9	98.6	1174.22	793.9	196	444	1090	1962	2167	54.51	36.86	9.1	20.61	50.6	91.09	100.6
DTX-comp_Zb87-B-R43-Map8_reversed	Z. brevis	Zb87	2219	14659	17	4	15	4	90.64	6.18	79.5	83.34	92	95.4	97.8	979.53	954.07	21	83	817	2205	2217	44.14	43	0.95	3.74	36.82	99.37	99.91
DTX-comp_Zb87-B-R61-Map3_reversed	Z. brevis	Zb87	3533	7516	5	2	5	2	86.14	11.63	73.3	77.5	83.6	96.3	100	1503.2	1853.74	57	145	249	3532	3533	42.55	52.47	1.61	4.1	7.05	99.97	100
DTX-comp_Zb87-B-R82-Map5	Z. brevis	Zb87	3448	39044	22	6	18	7	76.64	11.73	65.6	69.8	70.97	88.4	96.53	2169.11	1306.2	42	1145	2363	3440	3496	62.91	37.88	1.22	33.21	68.53	99.77	101.39
DTX-comp_Zb87-B-R83-Map10	Z. brevis	Zb87	2209	19900	16	8	16	8	92.73	6.27	74.7	90.5	95.85	97	97.5	1243.75	1027.65	32	184	1778	2191	2207	56.3	46.52	1.45	8.33	80.49	99.19	99.91
DTX-incomp_Zb87-B-G168-Map6_reversed	Z. brevis	Zb87	3357	15046	9	3	7	4	91.37	8.87	73.1	87.89	95.2	97.2	98.2	2149.43	1520.92	130	432	3328	3353	3358	64.03	45.31	3.87	12.87	99.14	99.88	100.03
DTX-incomp_Zb87-B-G208-Map5	Z. brevis	Zb87	3537	22516	12	5	12	5	87.03	11.5	69.8	83	89.1	97.9	98.2	1876.33	1519.95	52	760	1346.5	3532	3537	53.05	42.97	1.47	21.49	38.07	99.86	100
DTX-incomp_Zb87-B-G221-Map5	Z. brevis	Zb87	3960	24201	7	6	7	6	92.14	8.09	75.1	89	96.5	97.1	97.3	3457.29	1399.91	286	3953	3958	3959	4131	87.31	35.35	7.22	99.82	99.95	99.97	104.32
DTX-incomp_Zb87-B-G223-Map4	Z. brevis	Zb87	3887	21338	15	4	14	5	84.06	10.79	71.6	73.9	81.3	97	98.4	1524.14	1820.46	68	131	202.5	3858	3883	39.21	46.83	1.75	3.37	5.21	99.25	99.9
DTX-incomp_Zb87-B-G241-Map4	Z. brevis	Zb87	3864	19789	8	4	8	4	94	7.2	76.5	95.3	96.5	98.1	98.2	2473.62	1679	33	1140	3290.5	3864	3881	64.02	43.45	0.85	29.5	85.16	100	100.44
DTX-incomp_Zb87-B-G242-Map3_reversed	Z. brevis	Zb87	3822	19315	8	3	8	3	93.47	6.27	83	89.6	97.4	98.3	98.6	2414.38	1371.91	604	1447	2543.5	3821	3830	63.17	35.9	15.8	37.86	66.55	99.97	100.21
DTX-incomp_Zb87-B-G258-Map3	Z. brevis	Zb87	4143	36179	35	4	31	4	78.36	7.11	71.85	74.3	75.6	79.8	98.3	1171	1695.18	87	164	224	3885	4137	28.26	40.92	2.1	3.96	5.41	93.77	99.86
DTX-incomp_Zb87-B-G264-Map7	Z. brevis	Zb87	4041	36543	13	7	13	7	95.19	5.77	79.9	97	97.6	97.9	98.3	2811	1618.37	143	1879	3988	4035	4037	69.56	40.05	3.54	46.5	98.69	99.85	99.9
DTX-incomp_Zb87-B-G332-Map3	Z. brevis	Zb87	5374	16217	4	3	4	3	92.83	9.95	77.9	97.6	97.75	97.9	97.9	4054.25	2638.83	96	5373	5373.5	5374	5374	75.44	49.1	1.79	99.98	99.99	100	100
DTX-incomp_Zb87-B-G416-Map10	Z. brevis	Zb87	8062	13030	13	1	12	1	83.65	7.37	71.5	80.3	84.55	90.6	93.3	1085.83	2206.35	47	63	245.5	836	7766	13.47	27.37	0.58	0.78	3.05	10.37	96.33
DTX-incomp_Zb87-B-G455-Map20	Z. brevis	Zb87	9429	55963	15	2	15	2	90.37	10.87	67.8	82.4	96.2	96.5	100	3730.87	3726.37	29	136	2466	7079	9421	39.57	39.52	0.31	1.44	26.15	75.08	99.92
DTX-incomp_Zb87-B-G476-Map20	Z. brevis	Zb87	11236	458983	86	19	73	23	95.11	5.56	58.5	95.7	96.27	96.6	98.5	6287.44	4064.83	185	2767	6091	11163	11262	55.96	36.18	1.65	24.63	54.21	99.35	100.23
DTX-incomp_Zb87-B-G760-Map3	Z. brevis	Zb87	1648	12444	9	1900-01-06	9	6	82.67	11.32	71.9	75.3	76.5	96.7	98.1	1382.67	496.13	438	1556	1644	1646	1648	83.9	30.1	26.58	94.42	99.76	99.88	100
DTX-incomp_Zb87-B-G872-Map3_reversed	Z. brevis	Zb87	2312	4849	3	2	3	2	94.87	3.88	90.4	90.4	96.8	97.4	97.4	1616.33	1212.82	216	216	2301	2332	2332	69.91	52.46	9.34	9.34	99.52	100.87	100.87
DTX-incomp_Zb87-B-P2.10-Map4	Z. brevis	Zb87	5348	41075	24	4	20	6	92.02	8.77	66.92	92.06	94.2	97.7	99.5	2053.75	2394.3	30	200	509.5	5340	5404	38.4	44.77	0.56	3.74	9.53	99.85	101.05
DTX-incomp_Zb87-B-P32.10-Map10	Z. brevis	Zb87	5508	100715	41	13	39	14	88.6	10.62	58.4	84.65	90.7	97.4	98.2	2582.44	2432.93	29	101	1514	5391	5620	46.89	44.17	0.53	1.83	27.49	97.88	102.03
DTX-incomp_Zb87-B-P40.20-Map4	Z. brevis	Zb87	3841	21849	15	4	13	5	83.16	12.29	67.5	74.11	78	97.3	98.5	1680.69	1813.15	31	182	232	3838	3843	43.76	47.21	0.81	4.74	6.04	99.92	100.05
DTX-incomp_Zb87-B-P43.17-Map3	Z. brevis	Zb87	5920	127152	52	5	31	15	93.31	2.53	85.76	91.88	93.5	94.69	98.6	4102.87	2280.26	228	1414	5388	5923	5954	69.31	38.52	3.85	23.89	91.01	100.05	100.57
DTX-incomp_Zb87-B-P44.16-Map4	Z. brevis	Zb87	895	6978	16	4	15	5	81.67	13.5	65.1	71.2	75.2	97.9	100	465.2	333.45	27	205	346	890	893	51.98	37.26	3.02	22.91	38.66	99.44	99.78
DTX-incomp_Zb87-B-P49.11-Map4_reversed	Z. brevis	Zb87	3370	46524	31	7	29	7	79.95	9.32	64.8	74.6	77.3	85.8	99	1604.45	1492.38	87	166	598	3259	3596	47.61	44.28	2.58	4.93	17.74	96.71	106.71
DTX-incomp_Zb87-B-R110-Map3	Z. brevis	Zb87	2395	4025	4	1	4	1	86.7	13.71	69.4	82.1	89.2	99	99	1006.25	1139.3	53	95	788.5	2395	2395	42.01	47.57	2.21	3.97	32.92	100	100
DTX-incomp_Zb87-B-R135-Map7	Z. brevis	Zb87	3024	12218	12	1900-01-02	11	2	95.85	2.97	88.9	94.63	96.4	97.8	100	1110.73	1188.89	44	45	732	2268	3024	36.73	39.32	1.46	1.49	24.21	75	100
DTX-incomp_Zb87-B-R152-Map3	Z. brevis	Zb87	2233	6689	3	3	3	3	97	1.21	95.7	95.7	97.2	98.1	98.1	2229.67	2.31	2227	2227	2231	2231	2231	99.85	0.1	99.73	99.73	99.91	99.91	99.91
DTX-incomp_Zb87-B-R155-Map5	Z. brevis	Zb87	2355	9429	7	3	7	3	96.37	2.7	90.4	96.7	97	98.2	98.2	1347	1032.84	74	104	1531	2355	2355	57.2	43.86	3.14	4.42	65.01	100	100
DTX-incomp_Zb87-B-R164-Map8	Z. brevis	Zb87	3197	21655	13	3	12	3	92.99	9.2	69.6	96.5	97.1	97.4	97.8	1804.67	1229.46	102	747	1800.5	3110	3179	56.45	38.46	3.19	23.37	56.32	97.28	99.44
DTX-incomp_Zb87-B-R201-Map9_reversed	Z. brevis	Zb87	2949	37436	26	8	19	9	93.09	4.27	80.7	90.1	94.85	96.2	96.7	1971.11	1080.12	152	831	2653	2907	2927	66.84	36.63	5.15	28.18	89.96	98.58	99.25
DTX-incomp_Zb87-B-R203-Map8	Z. brevis	Zb87	2957	23196	17	1900-01-07	15	7	89.67	7.43	75.7	83.5	91.7	95.82	96.5	1546.4	1421.29	35	110	2091	2925	2934	52.3	48.07	1.18	3.72	70.71	98.92	99.22
DTX-incomp_Zb87-B-R225-Map3	Z. brevis	Zb87	2893	12221	10	3	10	3	84.75	11.47	68.4	75	84.45	97.6	97.9	1222.1	1261.02	90	154	799	2880	2893	42.24	43.59	3.11	5.32	27.62	99.55	100
DTX-incomp_Zb87-B-R231-Map4	Z. brevis	Zb87	1623	9945	7	6	7	6	82.83	13.39	60.9	76.3	78.6	95.2	96.9	1420.71	524.18	232	1616	1618	1620	1623	87.54	32.3	14.29	99.57	99.69	99.82	100
DTX-incomp_Zb87-B-R254-Map9	Z. brevis	Zb87	4092	32667	34	3	28	3	87.98	10.11	70.9	75.5	93.03	96.4	99	1166.89	1358.41	42	194	376	2050	4092	28.52	33.2	1.03	4.74	9.19	50.1	100
DTX-incomp_Zb87-B-R278-Map3_reversed	Z. brevis	Zb87	3145	9395	4	2	4	2	98.4	0.81	97.7	97.7	98.4	99.1	99.1	2348.75	1415.38	231	2915	3009.5	3145	3145	74.68	45	7.34	92.69	95.69	100	100
DTX-incomp_Zb87-B-R303-Map16_reversed	Z. brevis	Zb87	2999	16345	15	1	14	1	94.79	7.08	71	94.9	97.35	97.7	98.1	1167.57	832.78	207	626	932	1721	3002	38.93	27.77	6.9	20.87	31.08	57.39	100.1
DTX-incomp_Zb87-B-R306-Map3	Z. brevis	Zb87	2144	25059	24	1	24	1	76.75	11.35	68.6	70	70.2	85.4	100	1044.12	587.97	26	828	1203.5	1298	2143	48.7	27.42	1.21	38.62	56.13	60.54	99.95
DTX-incomp_Zb87-B-R308-Map8_reversed	Z. brevis	Zb87	3175	17426	13	2	12	3	85.42	14.32	57.3	71.2	92.8	97.2	98.2	1452.17	1279.84	33	446	942.5	3145	3175	45.74	40.31	1.04	14.05	29.69	99.06	100
DTX-incomp_Zb87-B-R309-Map6	Z. brevis	Zb87	5363	33857	16	3	12	5	86.66	10.19	65.2	84.9	88.3	96.1	98.3	2821.42	2572.53	51	192	3065	5339	5491	52.61	47.97	0.95	3.58	57.15	99.55	102.39
DTX-incomp_Zb87-B-R356-Map5	Z. brevis	Zb87	2669	15396	19	4	17	5	89.91	6.15	81.37	83.8	91.7	93.8	98.2	905.65	1207.58	43	48	49	2646	2699	33.93	45.24	1.61	1.8	1.84	99.14	101.12
DTX-incomp_Zb87-B-R36-Map20	Z. brevis	Zb87	8225	134772	74	1	60	2	94.28	4.35	74.8	94.2	95.5	96.6	97.9	2246.37	2525.05	28	376	1290	3091	8212	27.31	30.7	0.34	4.57	15.68	37.58	99.84
DTX-incomp_Zb87-B-R382-Map3_reversed	Z. brevis	Zb87	1936	8567	9	2	8	2	83.76	13.55	69	74.41	79.85	100	100	1070.88	870.77	25	462	1182	1936	1943	55.31	44.98	1.29	23.86	61.05	100	100.36
DTX-incomp_Zb87-B-R39-Map4	Z. brevis	Zb87	1643	6540	5	3	4	4	97	1.62	94.68	97.1	97.55	98.2	98.2	1635	13.37	1615	1641	1641	1643	1643	99.51	0.81	98.3	99.88	99.88	100	100
DTX-incomp_Zb87-B-R4-Map3	Z. brevis	Zb87	4027	30286	17	6	16	6	78.93	8.87	69.53	72.6	77.9	85	97.9	1892.88	1895.07	31	138	960.5	3994	4027	47	47.06	0.77	3.43	23.85	99.18	100
DTX-incomp_Zb87-B-R41-Map11	Z. brevis	Zb87	7089	47835	12	5	10	5	91.7	10.31	71.2	93.2	96.36	97.8	98.67	4783.6	3198.83	43	413	6724.5	7065	7088	67.48	45.12	0.61	5.83	94.86	99.66	99.99
DTX-incomp_Zb87-B-R44-Map20	Z. brevis	Zb87	5488	121974	63	10	63	10	89.88	10.1	68.9	86.4	95.4	97.3	98.4	1936.1	2074.05	28	139	883	3637	5425	35.28	37.79	0.51	2.53	16.09	66.27	98.85
DTX-incomp_Zb87-B-R45-Map8	Z. brevis	Zb87	5394	47597	32	1	29	2	84.93	10.38	62.4	78	85.88	94.5	97.2	1646.17	1657.57	24	276	1252	2154	5299	30.52	30.73	0.44	5.12	23.21	39.93	98.24
DTX-incomp_Zb87-B-R46-Map10_reversed	Z. brevis	Zb87	3175	22377	13	4	13	4	91.75	11.42	58.1	94.1	96.4	97	97.7	1721.31	1378.69	33	271	2357	3129	3174	54.21	43.42	1.04	8.54	74.24	98.55	99.97
DTX-incomp_Zb87-B-R467-Map4	Z. brevis	Zb87	1637	5118	6	3	6	3	80.27	19.52	62	62	80.35	97.7	99.2	853	857.77	61	65	859.5	1636	1637	52.11	52.4	3.73	3.97	52.5	99.94	100
DTX-incomp_Zb87-B-R47-Map12	Z. brevis	Zb87	3516	36629	25	3	21	4	83.31	13.66	59.7	71.3	89.5	97.05	97.5	1744.24	1297.34	100	431	1599	3179	3593	49.61	36.9	2.84	12.26	45.48	90.42	102.19
DTX-incomp_Zb87-B-R65-Map9	Z. brevis	Zb87	3055	22518	16	2	15	2	90.14	6.06	73.8	86.6	91.19	94.2	97.9	1501.2	1016.45	123	469	1302	2728	3042	49.14	33.27	4.03	15.35	42.62	89.3	99.57
DTX-incomp_Zb87-B-R7-Map20	Z. brevis	Zb87	5675	115189	64	7	50	10	85.63	9.23	65.31	78.4	87.22	94.8	97.4	2303.78	2373.18	23	90	1295	5213	5586	40.6	41.82	0.41	1.59	22.82	91.86	98.43
DTX-incomp_Zb87-B-R85-Map5	Z. brevis	Zb87	7774	60474	30	4	25	4	86.41	8.89	70.2	78.4	90.6	92.1	98.1	2419.08	2845.98	34	87	952	3550	7973	31.12	36.61	0.44	1.12	12.25	45.67	102.56
DTX-incomp_Zb87-B-R89-Map4	Z. brevis	Zb87	1308	3023	5	1	5	1	83.32	6.37	78	80	80	84.8	93.8	604.6	508.67	66	114	783	795	1265	46.22	38.89	5.05	8.72	59.86	60.78	96.71
DTX-incomp_Zb87-B-R98-Map20	Z. brevis	Zb87	2921	30132	26	2	21	4	92.25	7.85	71	94.5	96.2	96.8	97.5	1435.1	1133.44	42	359	1161	2896	3188	49.13	38.8	1.44	12.29	39.75	99.14	109.14
noCat_Zb87-B-G166-Map20	Z. brevis	Zb87	3113	66737	51	6	46	6	81.74	12.56	58.7	70	80.65	96.44	98.1	1450.87	1157.72	39	204	1288.5	2496	3100	46.61	37.19	1.25	6.55	41.39	80.18	99.58
RXX-LARD_Zpa-B-G482-Map4	Z. passerinii	Zpa63	13887	474539	163	2	143	2	94.47	3.37	68	94.1	95.2	96.1	98	3318.77	3640.79	23	153	1676	5860	14346	23.9	26.22	0.17	1.1	12.07	42.2	103.31
RXX-LARD_Zpa-B-G554-Map5	Z. passerinii	Zpa63	11725	135693	44	1900-01-04	40	4	93.93	8.41	73.3	88.9	99.51	99.9	100	3594.5	3947.11	30	103	2377.5	7517	11725	30.66	33.66	0.26	0.88	20.28	64.11	100
RXX-LARD_Zpa-B-R214-Map5	Z. passerinii	Zpa63	1887	8514	11	3	11	3	88.69	5.8	75.6	84.8	90	93	94.8	774	904.79	26	30	146	1862	2009	41.02	47.95	1.38	1.59	7.74	98.68	106.47
RXX-TRIM_Zpa-B-P15.16-Map3	Z. passerinii	Zpa63	556	4430	9	1900-01-09	9	9	96.76	5.44	86.5	97.7	99.8	99.8	99.8	553.44	6.62	545	551	553	556	568	99.54	1.19	98.02	99.1	99.46	100	102.16
RXX-TRIM_Zpa-B-R223-Map7	Z. passerinii	Zpa63	626	5953	11	6	10	7	92.37	2.95	85.7	90.3	93.64	94	95.4	595.3	47.38	474	591	615.5	625	626	95.1	7.57	75.72	94.41	98.32	99.84	100
RIX-incomp_Zpa-B-G384-Map20_reversed	Z. passerinii	Zpa63	5623	207246	57	23	55	24	96.17	2.09	83.3	95.5	96.7	97.2	98.3	3768.11	2049.99	51	1747	4786	5592	5611	67.01	36.46	0.91	31.07	85.11	99.45	99.79
RLX-comp_Zpa-B-G324-Map20_reversed	Z. passerinii	Zpa63	5911	310290	227	1	214	2	93.54	3.63	69.3	92.5	94.5	95.8	97.6	1450.07	1145.11	171	754	763	2278	5889	24.53	19.37	2.89	12.76	12.91	38.54	99.63
RLX-comp_Zpa-B-G458-Map15	Z. passerinii	Zpa63	7643	252336	80	15	67	18	94.25	5.43	68.8	95.1	95.9	96.3	97.5	3766.73	2970.1	89	767	3089	7605	7672	49.28	38.86	1.16	10.04	40.42	99.5	100.38
RLX-comp_Zpa-B-G464-Map20	Z. passerinii	Zpa63	8523	342681	89	18	67	22	91.61	4.99	76.7	89.97	93.64	95.06	96.8	5115.48	3116.58	37	1903	5382	8401	8472	60.02	36.57	0.43	22.33	63.15	98.57	99.4
RLX-comp_Zpa-B-G483-Map10	Z. passerinii	Zpa63	8468	93195	14	10	14	10	92.44	10.16	65.7	95.8	96.3	96.8	97.2	6656.79	3164.42	22	4404	8452.5	8455	8471	78.61	37.37	0.26	52.01	99.82	99.85	100.04
RLX-comp_Zpa-B-G485-Map15	Z. passerinii	Zpa63	6853	65557	15	8	13	9	95.57	6.8	76.79	94.2	98.8	99.4	99.4	5042.85	2744.82	42	1498	6811	6815	6822	73.59	40.05	0.61	21.86	99.39	99.45	99.55
RLX-comp_Zpa-B-P11.0-Map4	Z. passerinii	Zpa63	9206	55071	10	3	10	3	96.68	0.67	96	96.1	96.4	97.5	97.7	5867.4	2806.72	1383	4113	4875.5	9148	9199	63.73	30.49	15.02	44.68	52.96	99.37	99.92
RLX-comp_Zpa-B-P22.11-Map6_reversed	Z. passerinii	Zpa63	8457	216642	71	18	64	22	90.42	6.65	67.6	87.9	93.2	95.2	96.57	3399.7	3816.96	26	292	795	8359	8683	40.2	45.13	0.31	3.45	9.4	98.84	102.67
RLX-comp_Zpa-B-P5.0-Map7_reversed	Z. passerinii	Zpa63	9324	154935	29	12	28	13	96.01	2.26	86.4	96.2	96.5	96.8	98	5699.11	3955.08	29	1881	8160	9268	9347	61.12	42.42	0.31	20.17	87.52	99.4	100.25
RLX-comp_Zpa-B-R15-Map15_reversed	Z. passerinii	Zpa63	5740	71530	36	2	32	4	88.15	12.41	68.8	71.9	96.55	97.5	98.2	2237.88	1993.72	128	399	1706	3935	6361	38.99	34.73	2.23	6.95	29.72	68.55	110.82
RLX-comp_Zpa-B-R19-Map17_reversed	Z. passerinii	Zpa63	8377	95403	47	5	45	5	82.98	11.12	68.2	72.4	83.7	96.36	97.7	2121.33	2783.4	86	311	555	2750	8368	25.32	33.23	1.03	3.71	6.63	32.83	99.89
RLX-comp_Zpa-B-R79-Map5_reversed	Z. passerinii	Zpa63	6909	127109	31	14	28	16	81.98	11.75	57.64	71.3	85.55	88.19	98.3	4569.25	2817.36	259	1393	6779.5	6909	7079	66.13	40.78	3.75	20.16	98.13	100	102.46
RLX-incomp_Zpa-B-G233-Map20	Z. passerinii	Zpa63	4454	76745	69	2	64	2	94.58	2.75	81.8	94.5	95.6	96	97.1	1199.7	738.65	36	1149	1245.5	1280	4355	26.94	16.58	0.81	25.8	27.96	28.74	97.78
RLX-incomp_Zpa-B-G245-Map15	Z. passerinii	Zpa63	4498	9743	15	1	14	1	88	5.76	75.6	84.07	89.35	92.8	94.5	695.93	1295.58	24	146	164.5	215	4460	15.47	28.8	0.53	3.25	3.66	4.78	99.16
RLX-incomp_Zpa-B-G289-Map3_reversed	Z. passerinii	Zpa63	4290	135762	106	16	87	22	84.7	6.09	67.7	81.8	84.7	88.6	98	1562.53	1855.08	23	66	391	4187	4511	36.42	43.24	0.54	1.54	9.11	97.6	105.15
RLX-incomp_Zpa-B-G305-Map20_reversed	Z. passerinii	Zpa63	5128	291025	123	43	111	43	93.84	5.2	74.47	94.1	96	96.7	100	2624.66	2221.39	33	309	2238	5079	5137	51.18	43.32	0.64	6.03	43.64	99.04	100.18
RLX-incomp_Zpa-B-G350-Map14_reversed	Z. passerinii	Zpa63	5767	47087	47	2	44	3	90.58	7.72	69.2	86.1	94.9	96.2	97.4	1070.86	1553.82	122	483	500	717	5891	18.57	26.94	2.12	8.38	8.67	12.43	102.15
RLX-incomp_Zpa-B-G385-Map3	Z. passerinii	Zpa63	8007	15838	3	1	3	1	97.57	3.2	93.9	93.9	99	99.8	99.8	5279.33	2747.15	2516	2516	5312	8010	8010	65.93	34.31	31.42	31.42	66.34	100.04	100.04
RLX-incomp_Zpa-B-G388-Map5_reversed	Z. passerinii	Zpa63	11484	897109	233	1	200	5	92.43	3.64	73.03	92.1	93.5	94.3	96.2	4486.36	2579.12	22	1677	5598	6000	11575	39.07	22.46	0.19	14.6	48.75	52.25	100.79
RLX-incomp_Zpa-B-G391-Map3_reversed	Z. passerinii	Zpa63	6800	61810	28	5	26	6	91.61	4.85	74.1	90.4	92.2	94.4	97.1	2377.31	2875.33	26	154	503.5	6170	6810	34.96	42.28	0.38	2.26	7.4	90.74	100.15
RLX-incomp_Zpa-B-G393-Map9	Z. passerinii	Zpa63	6875	296207	178	1900-01-11	147	14	91.2	3.95	73.6	89.4	92.2	93.9	97.7	2015.1	2176	22	232	1152	3311	7049	29.31	31.65	0.32	3.37	16.76	48.16	102.53
RLX-incomp_Zpa-B-G414-Map4	Z. passerinii	Zpa63	9714	82812	24	1	22	3	94.24	3.72	81	94.6	95.49	96.5	96.9	3764.18	3150.91	26	811	4453	5272	9718	38.75	32.44	0.27	8.35	45.84	54.27	100.04
RLX-incomp_Zpa-B-G418-Map4	Z. passerinii	Zpa63	8257	14770	5	0	3	0	92.87	2.97	89.47	89.47	94.25	94.9	94.9	4923.33	3381.88	1138	1138	5985	7647	7647	59.63	40.96	13.78	13.78	72.48	92.61	92.61
RLX-incomp_Zpa-B-G430-Map8	Z. passerinii	Zpa63	7425	56515	47	2	40	2	84.78	10.67	67.5	76.5	84.93	96.6	99.5	1412.88	1834.66	35	195	747	1943	7474	19.03	24.71	0.47	2.63	10.06	26.17	100.66
RLX-incomp_Zpa-B-G439-Map6	Z. passerinii	Zpa63	7576	204267	72	15	67	16	87.35	8.76	60.9	81.8	88.4	95.8	97.2	3049.18	2959.01	50	298	2022	6574	7829	40.25	39.06	0.66	3.93	26.69	86.77	103.34
RLX-incomp_Zpa-B-G446-Map4	Z. passerinii	Zpa63	9565	41272	18	1	17	1	93.96	9.06	59.2	95.92	96.1	96.7	98.1	2427.82	3094.97	127	276	1178	3153	9549	25.38	32.36	1.33	2.89	12.32	32.96	99.83
RLX-incomp_Zpa-B-G496-Map5	Z. passerinii	Zpa63	9877	66926	16	2	14	3	93.73	5.26	77.6	94.4	95.3	95.86	98.1	4780.43	3469.87	163	2332	4319	7334	9874	48.4	35.13	1.65	23.61	43.73	74.25	99.97
RLX-incomp_Zpa-B-G510-Map3	Z. passerinii	Zpa63	9052	42932	16	3	14	3	93.43	6.01	84.33	87	94.55	99.1	99.5	3066.57	3676.09	21	210	965	5560	9115	33.88	40.61	0.23	2.32	10.66	61.42	100.7
RLX-incomp_Zpa-B-G511-Map5	Z. passerinii	Zpa63	11233	398874	160	1	125	2	92.16	4.57	71.5	91.46	93.34	95.3	96.8	3191.34	2734.9	24	1030	2090	5327	11219	28.41	24.35	0.21	9.17	18.61	47.42	99.88
RLX-incomp_Zpa-B-G513-Map4	Z. passerinii	Zpa63	11248	345372	102	2	80	7	92.25	5.22	71.57	90.9	93.9	95.4	98.6	4317.46	3322.26	22	829	5292	5862	11237	38.38	29.54	0.2	7.37	47.05	52.12	99.9
RLX-incomp_Zpa-B-G514-Map3	Z. passerinii	Zpa63	11424	84047	42	3	33	4	85.86	10.84	60.5	76.5	91.7	93.7	96.8	2550.79	4092.31	92	127	407	1843	11452	22.33	35.82	0.81	1.11	3.56	16.13	100.25
RLX-incomp_Zpa-B-G517-Map3_reversed	Z. passerinii	Zpa63	10289	56715	16	2	14	3	91.86	8.09	68.1	89	95.38	96.9	97.5	4051.07	4414.21	21	786	1286.5	9691	10547	39.37	42.9	0.2	7.64	12.5	94.19	102.51
RLX-incomp_Zpa-B-G539-Map4_reversed	Z. passerinii	Zpa63	12116	112445	20	5	16	6	90.21	8.94	70.3	83.9	95.25	96.2	96.8	7028.62	5265.84	49	1612	9601.5	12072	12143	58.01	43.46	0.4	13.3	79.25	99.64	100.22
RLX-incomp_Zpa-B-G54-Map20	Z. passerinii	Zpa63	9524	154562	23	13	22	14	95.39	2.52	85.6	95.9	96.4	96.6	96.8	7025.55	3544.07	29	4824	9283.5	9300	9373	73.77	37.21	0.3	50.65	97.47	97.65	98.41
RLX-incomp_Zpa-B-G541-Map5	Z. passerinii	Zpa63	12091	144270	30	1	30	1	94.05	6.71	70	95.2	96.4	97.1	100	4809	3185.12	39	2672	6919.5	6929	11731	39.77	26.34	0.32	22.1	57.23	57.31	97.02
RLX-incomp_Zpa-B-G635-Map3	Z. passerinii	Zpa63	574	613	3	1	3	1	97.8	0.36	97.4	97.4	97.9	98.1	98.1	204.33	316.68	21	21	22	570	570	35.6	55.17	3.66	3.66	3.83	99.3	99.3
RLX-incomp_Zpa-B-G661-Map7	Z. passerinii	Zpa63	630	629	1	1900-01-01	1	1	98.1	0	98.1	98.1	98.1	98.1	98.1	629	0	629	629	629	629	629	99.84	0	99.84	99.84	99.84	99.84	99.84
RLX-incomp_Zpa-B-G8-Map20	Z. passerinii	Zpa63	5076	11007	16	1	15	1	91.41	6.66	73.3	89.7	93.5	96	97.2	1016.73	1620.63	31	55	230	997	4945	20.03	31.93	0.61	1.08	4.53	19.64	97.42
RLX-incomp_Zpa-B-P37.0-Map3_reversed	Z. passerinii	Zpa63	9210	87221	17	1900-01-05	15	6	95.17	3.71	86.1	95.6	96.23	97.1	98.5	5814.73	3649.53	29	1853	6445	9192	9377	63.13	39.63	0.31	20.12	69.98	99.8	101.81
RLX-incomp_Zpa-B-P4.0-Map11	Z. passerinii	Zpa63	9323	336915	72	18	63	20	95.81	3.46	74	95.9	96.6	97	100	5348.27	3592.63	27	1683	5688	9233	9352	57.37	38.54	0.29	18.05	61.01	99.03	100.31
RLX-incomp_Zpa-B-R1-Map20	Z. passerinii	Zpa63	6935	651892	175	1900-03-05	158	70	94.65	1.63	85.48	94.1	95.1	95.5	97	4170.39	2630.74	28	1554	4154.5	6885	7049	60.14	37.93	0.4	22.41	59.91	99.28	101.64
RLX-incomp_Zpa-B-R10-Map20	Z. passerinii	Zpa63	5720	56572	58	2	56	2	87.2	10.59	68.9	74.5	92.55	95.7	97.8	1010.21	1376.06	28	204	369	1175	5633	17.66	24.06	0.49	3.57	6.45	20.54	98.48
RLX-incomp_Zpa-B-R100-Map12	Z. passerinii	Zpa63	3761	13535	12	3	12	3	82.51	9.27	67.8	76.2	84.25	90.1	97.3	1127.92	1608.28	21	65	184	3660	3751	29.99	42.76	0.56	1.73	4.89	97.31	99.73
RLX-incomp_Zpa-B-R112-Map20	Z. passerinii	Zpa63	4887	107051	86	6	72	11	90.08	5.42	68.5	88.2	91.85	93.4	96.4	1487.38	1832.74	30	165	202.5	2938	4849	30.44	37.5	0.61	3.38	4.14	60.12	99.22
RLX-incomp_Zpa-B-R117-Map9_reversed	Z. passerinii	Zpa63	6755	48936	25	3	24	4	88.96	9.8	61.6	84.4	90.9	97.5	99.3	2320.54	2704.65	31	232	623.5	5422	6747	34.35	40.04	0.46	3.43	9.23	80.27	99.88
RLX-incomp_Zpa-B-R128-Map8_reversed	Z. passerinii	Zpa63	2368	13362	9	2	9	2	94.17	5.7	79.4	94.8	95.7	96.6	97.8	1484.67	954.57	101	302	1993	2126	2365	62.7	40.31	4.27	12.75	84.16	89.78	99.87
RLX-incomp_Zpa-B-R157-Map3_reversed	Z. passerinii	Zpa63	10201	32085	14	2	11	2	75.03	17.91	57	58.62	66.3	96	99.8	2916.82	3858.11	25	102	1611	3817	10203	28.59	37.82	0.25	1	15.79	37.42	100.02
RLX-incomp_Zpa-B-R17-Map20_reversed	Z. passerinii	Zpa63	5585	153009	62	14	58	15	92.55	9.04	68.7	93.6	96.77	97.3	97.9	2638.16	2095.92	97	573	2293	5554	5577	47.24	37.53	1.74	10.26	41.06	99.44	99.86
RLX-incomp_Zpa-B-R182-Map16_reversed	Z. passerinii	Zpa63	5079	61997	25	10	22	10	93	7.37	71.1	92.9	95.58	97.5	98	2818.05	2224.06	26	338	3772	4925	5043	55.48	43.79	0.51	6.65	74.27	96.97	99.29
RLX-incomp_Zpa-B-R194-Map3	Z. passerinii	Zpa63	1249	9569	13	6	13	6	84.03	8.76	65.5	79.7	83.5	90.6	98.2	736.08	581.65	35	159	1164	1252	1294	58.93	46.57	2.8	12.73	93.19	100.24	103.6
RLX-incomp_Zpa-B-R249-Map4	Z. passerinii	Zpa63	8574	17333	7	1	7	1	88.51	11.58	67.1	82.7	92.3	99.6	99.8	2476.14	3941.78	52	118	146	7891	8582	28.88	45.97	0.61	1.38	1.7	92.03	100.09
RLX-incomp_Zpa-B-R27-Map16_reversed	Z. passerinii	Zpa63	7638	99469	85	1	82	1	90.71	5.95	60.9	90	92.25	94	97.9	1213.04	1695.21	23	200	311.5	1599	7599	15.88	22.19	0.3	2.62	4.08	20.93	99.49
RLX-incomp_Zpa-B-R31-Map5	Z. passerinii	Zpa63	905	2959	6	1	6	1	90.35	5.19	82.4	87.4	91	94.3	96	493.17	303.67	131	151	542	687	906	54.49	33.55	14.48	16.69	59.89	75.91	100.11
RLX-incomp_Zpa-B-R33-Map8	Z. passerinii	Zpa63	3750	20247	22	3	21	4	83.58	6.74	69.8	78.8	84	88.42	95.8	964.14	1506.5	22	30	133	661	3884	25.71	40.17	0.59	0.8	3.55	17.63	103.57
RLX-incomp_Zpa-B-R388-Map3	Z. passerinii	Zpa63	3900	11698	3	3	3	3	97.93	0.06	97.9	97.9	97.9	98	98	3899.33	1.15	3898	3898	3900	3900	3900	99.98	0.03	99.95	99.95	100	100	100
RLX-incomp_Zpa-B-R7-Map20	Z. passerinii	Zpa63	6727	273369	72	27	67	30	95.18	4.15	71.5	95.4	95.8	96.5	100	4086.06	2781.01	82	832	6020	6717	6787	60.74	41.34	1.22	12.37	89.49	99.85	100.89
RLX-incomp_Zpa-B-R98-Map7	Z. passerinii	Zpa63	1140	26672	43	3	42	3	88.38	4.01	78.5	86.5	88	90.5	96	635.05	260.75	57	538	545	933	1117	55.71	22.87	5	47.19	47.81	81.84	97.98
DHX-incomp_Zpa-B-R247-Map4_reversed	Z. passerinii	Zpa63	7127	21932	9	2	9	2	89.84	7.36	72.8	89.2	91.2	94.7	96.2	2436.89	3172.05	37	79	210	5436	7128	34.19	44.51	0.52	1.11	2.95	76.27	100.01
DHX-incomp_Zpa-B-R298-Map3	Z. passerinii	Zpa63	4459	40549	47	2	44	2	79.65	8.64	57	74	78.5	85.5	98	921.57	1229.23	29	103	347.5	1443	4462	20.67	27.57	0.65	2.31	7.79	32.36	100.07
DHX-incomp_Zpa-B-R61-Map4	Z. passerinii	Zpa63	7930	53666	75	3	69	5	86.62	9.28	66.5	79.8	87.5	93.9	100	777.77	2087.34	25	33	46	301	8046	9.81	26.32	0.32	0.42	0.58	3.8	101.46
DMX-incomp_Zpa-B-G456-Map20	Z. passerinii	Zpa63	12559	367436	61	16	56	16	95.37	5.06	76.3	96.2	97	97.3	99.4	6561.36	4832.05	51	1891	5793.5	12389	12775	52.24	38.47	0.41	15.06	46.13	98.65	101.72
DMX-incomp_Zpa-B-G548-Map3	Z. passerinii	Zpa63	12457	106712	18	5	17	6	95.53	2.54	88.2	94.5	96.3	97.3	98	6277.18	5777.09	71	412	5927	12397	12622	50.39	46.38	0.57	3.31	47.58	99.52	101.32
DMX-incomp_Zpa-B-R2-Map20	Z. passerinii	Zpa63	12563	197919	34	9	31	9	96.25	1.8	89.42	96	96.9	97.3	97.6	6385.32	4880.71	51	1585	6587	12386	12524	50.83	38.85	0.41	12.62	52.43	98.59	99.69
DXX-MITE_Zpa-B-G586-Map3	Z. passerinii	Zpa63	414	2404	11	3	10	3	88.2	9.24	75.7	78.53	89.2	97.3	98.5	240.4	136.32	51	166	181	408	414	58.07	32.93	12.32	40.1	43.72	98.55	100
DXX-MITE_Zpa-B-G604-Map9	Z. passerinii	Zpa63	417	8382	37	9	31	9	86.2	8.75	75.8	79.1	82.26	97.6	99.8	270.39	124.87	70	191	231	410	564	64.84	29.94	16.79	45.8	55.4	98.32	135.25
DXX-MITE_Zpa-B-G607-Map4	Z. passerinii	Zpa63	508	4393	12	5	12	5	88.83	8.05	74	88.4	91.4	95.5	96.8	366.08	163.17	135	179	425.5	508	538	72.06	32.12	26.57	35.24	83.76	100	105.91
DXX-MITE_Zpa-B-R13-Map5	Z. passerinii	Zpa63	503	8210	34	5	32	5	84.15	7.68	73.1	78.2	80.51	90.7	98.2	259.91	173.7	24	111	210.5	469	503	51.67	34.53	4.77	22.07	41.85	93.24	100
DTX-comp_Zpa-B-G951-Map3	Z. passerinii	Zpa63	2219	27055	25	6	20	8	84.77	7.36	74.1	78.7	84.9	88.6	97.9	1352.75	904.89	23	472	1686	2209	2242	60.96	40.78	1.04	21.27	75.98	99.55	101.04
DTX-comp_Zpa-B-G962-Map5_reversed	Z. passerinii	Zpa63	2183	24084	23	6	19	8	84.67	8.93	67.7	78	84.2	92.9	97.5	1267.58	905.77	53	229	1154	2180	2217	58.07	41.49	2.43	10.49	52.86	99.86	101.56
DTX-comp_Zpa-B-P10.18-Map5_reversed	Z. passerinii	Zpa63	2184	4463	3	2	3	2	98.77	1.37	97.3	97.3	99	100	100	1487.67	1202.62	99	99	2181	2183	2183	68.12	55.07	4.53	4.53	99.86	99.95	99.95
DTX-comp_Zpa-B-R115-Map5	Z. passerinii	Zpa63	3421	40261	34	6	30	8	79.85	8.69	63.2	74.9	77.5	81.2	98	1342.03	1390.34	38	218	500.5	3320	3580	39.23	40.64	1.11	6.37	14.63	97.05	104.65
DTX-comp_Zpa-B-R163-Map4	Z. passerinii	Zpa63	3337	38937	25	7	22	10	83.94	8.3	70.8	76.8	84.43	88.8	97.52	1769.86	1554.52	43	64	2165	3305	3337	53.04	46.58	1.29	1.92	64.88	99.04	100
DTX-comp_Zpa-B-R215-Map12_reversed	Z. passerinii	Zpa63	2232	21188	20	2	17	4	91.27	7.69	74.8	88.5	95.29	96.8	97.7	1246.35	748.29	27	769	1120	1848	2236	55.84	33.53	1.21	34.45	50.18	82.8	100.18
DTX-comp_Zpa-B-R285-Map6_reversed	Z. passerinii	Zpa63	2193	9072	8	3	7	3	90.14	9.32	75.2	78.3	94	97	97.2	1296	1038.29	33	241	1882	2200	2221	59.1	47.35	1.5	10.99	85.82	100.32	101.28
DTX-comp_Zpa-B-R302-Map8_reversed	Z. passerinii	Zpa63	3488	37508	35	5	33	5	84.2	10.78	62.3	76	83.4	95.7	100	1136.61	1285.5	28	157	353	1912	3577	32.59	36.85	0.8	4.5	10.12	54.82	102.55
DTX-comp_Zpa-B-R35-Map7_reversed	Z. passerinii	Zpa63	4095	18794	20	2	20	2	82.89	12.42	58	73.7	78	96.9	97.4	939.7	1326.02	22	94	185	1549	4090	22.95	32.38	0.54	2.3	4.52	37.83	99.88
DTX-comp_Zpa-B-R39-Map4	Z. passerinii	Zpa63	3318	32183	24	1	21	2	79.59	11.82	67.5	71.3	72.5	94.3	98.3	1532.52	1043.11	150	570	1281	2231	3440	46.19	31.44	4.52	17.18	38.61	67.24	103.68
DTX-comp_Zpa-B-R66-Map7_reversed	Z. passerinii	Zpa63	2488	16960	25	3	25	3	82.01	11.98	70	72.7	77.2	97.3	99.7	678.4	850.63	70	176	297	440	2488	27.27	34.19	2.81	7.07	11.94	17.68	100
DTX-comp_Zpa-B-R68-Map4	Z. passerinii	Zpa63	3549	48085	29	1900-01-04	28	5	77.05	10.73	62.2	70.2	71.8	90.03	97.3	1717.32	1265.01	29	693	1451.5	3130	3568	48.39	35.64	0.82	19.53	40.9	88.19	100.54
DTX-incomp_Zpa-B-G169-Map5	Z. passerinii	Zpa63	3170	18943	42	2	40	2	79.31	7.93	65	72.7	79.55	83.7	97.2	473.57	933.42	28	33	71.5	329	3508	14.94	29.45	0.88	1.04	2.26	10.38	110.66
DTX-incomp_Zpa-B-G177-Map20	Z. passerinii	Zpa63	5464	14506	13	2	13	2	74.85	13.19	57.1	69.8	70.8	80.5	95.3	1115.85	1895.5	27	132	479	668	5424	20.42	34.69	0.49	2.42	8.77	12.23	99.27
DTX-incomp_Zpa-B-G224-Map3	Z. passerinii	Zpa63	3556	40474	28	5	25	5	78.96	10.82	64.7	71.4	73.6	84.6	97.5	1618.96	1492.37	50	128	902	3241	3568	45.53	41.97	1.41	3.6	25.37	91.14	100.34
DTX-incomp_Zpa-B-G290-Map3	Z. passerinii	Zpa63	5743	29463	41	1	38	1	84.8	8.06	68.7	78.3	83.25	92.8	98.5	775.34	1437.72	21	67	108.5	802	5747	13.5	25.03	0.37	1.17	1.89	13.96	100.07
DTX-incomp_Zpa-B-G308-Map20	Z. passerinii	Zpa63	5674	71194	28	6	24	7	87.9	13.61	56.5	89.89	94.59	96.4	97.1	2966.42	2600.3	32	116	4516	5403	5673	52.28	45.83	0.56	2.04	79.59	95.22	99.98
DTX-incomp_Zpa-B-G346-Map20	Z. passerinii	Zpa63	6078	59160	47	1	41	3	87.76	6.8	74.3	83.2	88.5	93.84	96.8	1442.93	2156.35	22	61	118	2236	5950	23.74	35.48	0.36	1	1.94	36.79	97.89
DTX-incomp_Zpa-B-G535-Map8	Z. passerinii	Zpa63	6846	103087	43	9	39	9	90.07	7.93	65.8	83.44	93.9	96.3	100	2643.31	2889.61	24	72	816	5920	6858	38.61	42.21	0.35	1.05	11.92	86.47	100.18
DTX-incomp_Zpa-B-G965-Map3	Z. passerinii	Zpa63	2242	22427	21	5	19	5	83.11	12.17	61.5	74.2	77.1	95.5	98.6	1180.37	870.82	26	424	991	2179	2346	52.65	38.84	1.16	18.91	44.2	97.19	104.64
DTX-incomp_Zpa-B-P0.23-Map20	Z. passerinii	Zpa63	823	40813	82	2	80	2	90.88	7.21	73.2	86.5	94.5	96.3	100	510.16	290.99	26	216	714.5	742	802	61.99	35.36	3.16	26.25	86.82	90.16	97.45
DTX-incomp_Zpa-B-P27.8-Map8	Z. passerinii	Zpa63	6909	124160	68	10	61	11	88.13	8.18	66.2	82.1	89.5	96	98.9	2035.79	2636.5	22	117	550	4361	6926	29.47	38.16	0.32	1.69	7.96	63.12	100.25
DTX-incomp_Zpa-B-P7.15-Map9	Z. passerinii	Zpa63	9002	130317	25	1900-01-10	23	11	93.53	6.22	76.79	95.2	96.5	96.8	97.3	5665.96	3777.04	49	1339	7344	8971	9024	62.94	41.96	0.54	14.87	81.58	99.66	100.24
DTX-incomp_Zpa-B-R113-Map6	Z. passerinii	Zpa63	5393	37646	23	2	21	4	85.72	13.76	57.2	75	93.6	95.3	98.2	1792.67	1967.54	35	309	1294	2053	5464	33.24	36.48	0.65	5.73	23.99	38.07	101.32
DTX-incomp_Zpa-B-R12-Map8	Z. passerinii	Zpa63	5421	43324	21	4	18	4	84.38	15.53	55.5	80.44	93.05	95.6	97	2406.89	2283.81	27	207	1870.5	4904	5615	44.4	42.13	0.5	3.82	34.5	90.46	103.58
DTX-incomp_Zpa-B-R135-Map3_reversed	Z. passerinii	Zpa63	2026	14551	16	5	16	5	82.69	10.28	67.2	79.3	80.05	94.3	98.1	909.44	829.74	55	267	438.5	2018	2040	44.89	40.95	2.71	13.18	21.64	99.61	100.69
DTX-incomp_Zpa-B-R138-Map5	Z. passerinii	Zpa63	3131	32014	27	4	23	5	83.99	5.75	76.47	80.23	82.3	88	96.6	1391.91	1142.26	49	479	1200	2392	3126	44.46	36.48	1.56	15.3	38.33	76.4	99.84
DTX-incomp_Zpa-B-R159-Map4	Z. passerinii	Zpa63	3522	29796	38	2	32	2	79.93	9.46	59.6	72.78	78.1	87.3	97.5	931.38	984.68	65	215	584	1250	3518	26.44	27.96	1.85	6.1	16.58	35.49	99.89
DTX-incomp_Zpa-B-R183-Map6	Z. passerinii	Zpa63	2216	20187	24	2	21	3	83.25	8.24	69.3	77.7	81	90.9	95	961.29	790.43	97	210	689	1479	2219	43.38	35.67	4.38	9.48	31.09	66.74	100.14
DTX-incomp_Zpa-B-R200-Map3_reversed	Z. passerinii	Zpa63	3953	26886	41	2	40	2	76.03	8.84	64.7	71	74.1	78.3	99.4	672.15	1090.99	22	155	244.5	461	3970	17	27.6	0.56	3.92	6.19	11.66	100.43
DTX-incomp_Zpa-B-R209-Map3	Z. passerinii	Zpa63	8275	17336	4	2	4	2	90.05	13.16	70.4	94.9	96.05	97.7	97.7	4334	4555.82	215	566	4420.5	8280	8280	52.37	55.06	2.6	6.84	53.42	100.06	100.06
DTX-incomp_Zpa-B-R213-Map13	Z. passerinii	Zpa63	8525	56971	39	2	37	2	80.74	11.32	69.2	71.1	74.9	95.1	97.8	1539.76	2339.14	42	283	540	1614	8494	18.06	27.44	0.49	3.32	6.33	18.93	99.64
DTX-incomp_Zpa-B-R259-Map5	Z. passerinii	Zpa63	3803	39702	42	1900-01-03	38	4	79.25	7.78	67.6	73.48	76.52	84.2	97.4	1044.79	1456.53	35	130	174	1781	3807	27.47	38.3	0.92	3.42	4.58	46.83	100.11
DTX-incomp_Zpa-B-R276-Map8	Z. passerinii	Zpa63	3482	26248	47	3	43	3	78.23	11.15	62.7	70.3	75.7	90.9	97.1	612.19	986.48	27	76	172	487	3465	17.58	28.33	0.78	2.18	4.94	13.99	99.51
DTX-incomp_Zpa-B-R4-Map20	Z. passerinii	Zpa63	6970	72851	23	6	22	7	89.28	9.42	66.2	84.3	95.3	96.3	97	3311.41	3151.51	22	88	2336	6777	7094	47.51	45.22	0.32	1.26	33.52	97.23	101.78
DTX-incomp_Zpa-B-R6-Map20	Z. passerinii	Zpa63	7162	94396	48	6	41	7	87.85	9.04	66.2	83.1	91.6	95.2	96.8	2302.41	2745.39	22	100	670	4445	7250	32.15	38.33	0.31	1.4	9.35	62.06	101.23
DTX-incomp_Zpa-B-R63-Map14	Z. passerinii	Zpa63	9686	129636	30	7	28	7	94.2	6.67	73.5	96.2	96.7	97.1	98.1	4629.86	3828.62	38	424	3677.5	9470	9681	47.8	39.53	0.39	4.38	37.97	97.77	99.95
DTX-incomp_Zpa-B-R77-Map14_reversed	Z. passerinii	Zpa63	5133	43649	42	3	36	3	89.08	7.79	73.7	81.7	91.75	96.2	97.6	1212.56	1729.3	35	67	475.5	1325	5124	23.62	33.69	0.68	1.31	9.26	25.81	99.82
DTX-incomp_Zpa-B-R78-Map20	Z. passerinii	Zpa63	7823	113910	53	3	51	3	88.69	9.84	69.9	80.9	94.9	96.9	100	2233.53	2325	25	230	1447	3344	7757	28.55	29.72	0.32	2.94	18.5	42.75	99.16
DTX-incomp_Zpa-B-R81-Map7	Z. passerinii	Zpa63	3419	16079	18	2	18	2	87.33	11.02	69.6	74.9	91.5	96.5	100	893.28	1303.07	46	47	331	502	3472	26.13	38.11	1.35	1.37	9.68	14.68	101.55
noCat_Zpa-B-G18-Map20	Z. passerinii	Zpa63	12300	165508	118	1	99	1	81.78	8.57	66.6	74.8	80.7	88.7	97.1	1672.19	2731.37	23	116	223	1956	12180	13.6	22.21	0.19	0.94	1.81	15.9	99.02
noCat_Zpa-B-G558-Map20	Z. passerinii	Zpa63	17226	825685	96	6	92	6	96.22	2.93	77.9	96.4	96.7	97	100	8974.84	5746.97	26	5024	6944.5	15635	17051	52.1	33.36	0.15	29.17	40.31	90.76	98.98
noCat_Zpa-B-G64-Map20	Z. passerinii	Zpa63	18070	1033842	125	38	106	40	93.77	8.25	58.7	95.88	96.3	96.6	97.6	9754.26	6708.02	23	4289	7204.5	17488	17950	53.98	37.12	0.13	23.74	39.87	96.78	99.34
noCat_Zpa-B-G754-Map20	Z. passerinii	Zpa63	1055	1491	4	1	4	1	83.45	16.29	68.6	70.1	83.75	97.7	97.7	372.75	458.31	86	102	177	1051	1051	35.33	43.44	8.15	9.67	16.78	99.62	99.62
noCat_Zpa-B-R56-Map13	Z. passerinii	Zpa63	4156	31906	31	3	24	4	90.26	6.02	70.7	87.78	91.15	95.2	96.4	1329.42	1518.74	48	165	692	2698	4203	31.99	36.54	1.15	3.97	16.65	64.92	101.13
noCat_Zpa-B-R83-Map17	Z. passerinii	Zpa63	4891	42362	25	5	21	6	91.71	6.12	74.6	91.3	93.5	95.31	97.1	2018.86	2103.46	59	131	858	4757	5100	41.28	43.01	1.21	2.68	17.54	97.26	104.27
RXX-LARD_Zp13-B-G176-Map7	Z. pseudotritici	Zp13	10536	67418	36	1	34	1	92.77	8.67	72.3	95.4	96.7	97.3	99	1987.29	3317.39	44	102	147	1883	10536	18.86	31.49	0.42	0.97	1.4	17.87	100
RXX-LARD_Zp13-B-G239-Map4	Z. pseudotritici	Zp13	15034	39624	45	1	44	1	85.62	8.26	69	79.4	84.1	91.7	100	914.75	2922.73	30	62	78	96	15020	6.08	19.44	0.2	0.41	0.52	0.64	99.91
RXX-LARD_Zp13-B-G247-Map3	Z. pseudotritici	Zp13	16869	60624	24	3	24	3	87.74	8.37	77.5	81.2	86.2	95.9	100	2558.83	5645.34	49	69	95	96	16852	15.17	33.47	0.29	0.41	0.56	0.57	99.9
RXX-TRIM_Zp13-B-G297-Map8	Z. pseudotritici	Zp13	681	2385	7	3	7	3	88.43	8.67	74.3	82.2	88	97.4	97.4	395.14	271.68	101	150	251	681	681	58.02	39.89	14.83	22.03	36.86	100	100
RLX-comp_Zp13-B-G116-Map20	Z. pseudotritici	Zp13	6247	194461	68	26	63	28	88.75	13.59	56.7	84.8	96.2	97.8	98.8	3091	2872.98	26	270	1295	6206	6235	49.48	45.99	0.42	4.32	20.73	99.34	99.81
RLX-comp_Zp13-B-G120-Map20	Z. pseudotritici	Zp13	6788	134896	36	14	31	16	89.5	11.01	54.4	87.9	93	96.2	98.9	4352.32	2971.5	27	568	6653	6769	6775	64.12	43.78	0.4	8.37	98.01	99.72	99.81
RLX-comp_Zp13-B-G128-Map5_reversed	Z. pseudotritici	Zp13	6798	93921	35	6	28	10	87.54	11.98	56.3	85.5	90.85	95.9	100	3354.32	3064.25	57	178	2593.5	6795	6822	49.34	45.08	0.84	2.62	38.15	99.96	100.35
RLX-comp_Zp13-B-G170-Map6	Z. pseudotritici	Zp13	8320	54947	18	6	18	6	85.98	13.82	54.6	81.7	89.5	97.4	98.5	3052.61	3858.23	30	53	733.5	8302	8318	36.69	46.37	0.36	0.64	8.82	99.78	99.98
RLX-comp_Zp13-B-P27.12-Map6	Z. pseudotritici	Zp13	6803	82400	27	7	21	9	83.78	13.44	55	82.9	88.34	93.41	95.9	3923.86	2927.38	57	1120	4877	6798	6817	57.68	43.03	0.84	16.46	71.69	99.93	100.21
RLX-comp_Zp13-B-R27-Map14_reversed	Z. pseudotritici	Zp13	6809	55900	15	3	11	6	93.28	8.42	69.2	94.1	96.46	97.12	97.4	5082.09	2765.25	164	2061	6723	6807	6809	74.64	40.61	2.41	30.27	98.74	99.97	100
RLX-comp_Zp13-B-R8-Map20	Z. pseudotritici	Zp13	13612	1545384	241	34	166	47	97.15	2.58	80.6	97.4	98.05	98.2	98.7	9313.97	4741.27	226	4816	12381.5	13136	13608	68.42	34.83	1.66	35.38	90.96	96.5	99.97
RLX-incomp_Zp13-B-G11-Map20	Z. pseudotritici	Zp13	18097	201845	57	1	44	1	95.59	4.23	77.6	95.2	97.38	97.94	98.7	4587.75	3983.72	38	1613	3813.5	7140	18094	25.35	22.01	0.21	8.91	21.07	39.45	99.98
RLX-incomp_Zp13-B-G118-Map11	Z. pseudotritici	Zp13	7342	196780	72	14	61	20	84.84	11.26	55	80.8	88.9	94	96.6	3225.98	3128.21	34	319	1637	7315	7343	43.94	42.61	0.46	4.34	22.3	99.63	100.01
RLX-incomp_Zp13-B-G177-Map7	Z. pseudotritici	Zp13	9520	118066	26	6	21	9	92.53	6.1	77.4	92.2	94.9	96.6	97.4	5622.19	4120.69	155	789	5445	9470	9752	59.06	43.28	1.63	8.29	57.2	99.47	102.44
RLX-incomp_Zp13-B-G178-Map3	Z. pseudotritici	Zp13	16789	117326	36	1	28	1	90.25	14.39	54.4	91.97	96.95	98.5	99	4674.32	4239.2	27	265	5920	6773	16800	27.84	25.25	0.16	1.58	35.26	40.34	100.07
RLX-incomp_Zp13-B-G211-Map6_reversed	Z. pseudotritici	Zp13	18563	287174	53	3	46	3	96.56	3.67	81.9	97.3	97.97	98.3	98.6	6243.5	5304.29	60	1614	5221.5	8569	18763	33.63	28.57	0.32	8.69	28.13	46.16	101.08
RLX-incomp_Zp13-B-G213-Map4_reversed	Z. pseudotritici	Zp13	13343	128522	25	5	17	7	84	11.72	57.7	81.9	84.2	88.3	98.5	7560.12	5719.18	32	1653	8196	13342	13363	56.66	42.86	0.24	12.39	61.43	99.99	100.15
RLX-incomp_Zp13-B-G215-Map4	Z. pseudotritici	Zp13	13368	103596	22	5	17	6	80.75	14.98	58.38	67.7	81.1	97.4	98.8	6093.88	6037.54	51	303	3128	13293	13394	45.59	45.16	0.38	2.27	23.4	99.44	100.19
RLX-incomp_Zp13-B-G219-Map3	Z. pseudotritici	Zp13	15284	17497	9	1	9	1	80.8	17.88	54.3	61.1	86.2	96.4	98.6	1944.11	5014.52	27	56	276	349	15288	12.72	32.81	0.18	0.37	1.81	2.28	100.03
RLX-incomp_Zp13-B-G221-Map5	Z. pseudotritici	Zp13	13636	24792	25	1	25	1	80.42	9.44	59.4	74.7	81.5	85.4	98.3	991.68	3188.73	29	45	66	121	13630	7.27	23.38	0.21	0.33	0.48	0.89	99.96
RLX-incomp_Zp13-B-G223-Map16_reversed	Z. pseudotritici	Zp13	15615	402143	71	4	46	10	93.39	3.75	77.6	92.9	93.85	96.1	97.4	8742.91	6437.6	26	1089	12684	14342	15569	55.99	41.23	0.17	6.97	81.23	91.85	99.71
RLX-incomp_Zp13-B-G231-Map9	Z. pseudotritici	Zp13	16887	50252	27	1	27	1	85.6	11.89	59.4	76.1	88.3	97.5	100	1868.22	4844.35	31	69	159	190	16887	11.06	28.69	0.18	0.41	0.94	1.13	100
RLX-incomp_Zp13-B-G3-Map20_reversed	Z. pseudotritici	Zp13	9508	18569	3	1	3	1	94.47	0.65	93.8	93.8	94.5	95.1	95.1	6189.67	5335.09	60	60	8722	9787	9787	65.1	56.11	0.63	0.63	91.73	102.93	102.93
RLX-incomp_Zp13-B-G31-Map15	Z. pseudotritici	Zp13	4180	23849	19	1	17	1	84.92	10.17	68.7	74.7	88.88	94.44	96.4	1402.88	1343.58	56	140	1535	2048	4181	33.56	32.14	1.34	3.35	36.72	49	100.02
RLX-incomp_Zp13-B-G4-Map20	Z. pseudotritici	Zp13	13792	97620	43	1	34	1	89.58	8.28	69.7	83.7	93.25	96.5	97.3	2875.03	4235.07	27	376	785	2096	14130	20.85	30.71	0.2	2.73	5.69	15.2	102.45
RLX-incomp_Zp13-B-G86-Map5	Z. pseudotritici	Zp13	4724	32540	12	4	10	5	88.62	10.17	74.8	76.2	93.72	96.95	98.2	3254	2151.98	107	169	4464	4715	4740	68.88	45.55	2.27	3.58	94.5	99.81	100.34
RLX-incomp_Zp13-B-P12.0-Map5_reversed	Z. pseudotritici	Zp13	6057	47665	22	7	20	7	91.65	8.75	64.1	89.9	93.59	99.3	99.5	2383.25	2744.29	156	466	497	6030	6058	39.35	45.31	2.58	7.69	8.21	99.55	100.02
RLX-incomp_Zp13-B-P31.8-Map11_reversed	Z. pseudotritici	Zp13	8440	490996	128	32	97	49	89.84	9.65	54.4	90.7	93	95.63	96.6	5062.93	3790.02	27	233	8141	8390	8411	59.99	44.91	0.32	2.76	96.46	99.41	99.66
RLX-incomp_Zp13-B-R5-Map15	Z. pseudotritici	Zp13	12219	130821	29	1900-01-06	24	7	84.23	12.79	61.1	72.7	85.6	97.49	98.8	5450.88	5102.16	45	441	5100.5	12094	12217	44.61	41.76	0.37	3.61	41.74	98.98	99.98
RLX-incomp_Zp13-B-R72-Map9_reversed	Z. pseudotritici	Zp13	8288	30736	39	3	39	3	78.35	8.57	60.2	72.9	76.8	83.5	98	788.1	2181.05	30	90	138	231	8297	9.51	26.32	0.36	1.09	1.67	2.79	100.11
RLX-incomp_Zp13-B-R74-Map20	Z. pseudotritici	Zp13	37522	429091	63	2	55	2	89.71	11.06	58.2	82.8	96.4	97	98.7	7801.65	9955.31	31	127	3655	12720	37274	20.79	26.53	0.08	0.34	9.74	33.9	99.34
RLX-incomp_Zp13-B-R91-Map12	Z. pseudotritici	Zp13	4935	34140	14	1900-01-04	13	5	86.09	11.7	60.7	86	91.6	95.2	96.1	2626.15	2120.39	57	421	1934	4932	4936	53.21	42.97	1.16	8.53	39.19	99.94	100.02
RLX-incomp_Zp13-B-R98-Map10_reversed	Z. pseudotritici	Zp13	7011	48032	31	3	28	4	82.32	11.37	58.5	75.5	84.09	93.7	96.38	1715.43	2460.49	43	163	249.5	3493	7014	24.47	35.09	0.61	2.32	3.56	49.82	100.04
DHX-incomp_Zp13-B-G169-Map19	Z. pseudotritici	Zp13	8295	88883	35	8	32	8	86.51	9.64	61.4	78.3	87.35	97.8	98.5	2777.59	3493.48	46	120	732	8285	8294	33.49	42.12	0.55	1.45	8.82	99.88	99.99
DHX-incomp_Zp13-B-G179-Map12	Z. pseudotritici	Zp13	9702	30056	10	3	9	3	83.86	13.05	64.4	73.9	85.31	98.2	99.3	3339.56	4816.23	59	134	160	9699	9882	34.42	49.64	0.61	1.38	1.65	99.97	101.86
DHX-incomp_Zp13-B-G182-Map3	Z. pseudotritici	Zp13	9519	29848	10	3	9	3	81.56	17.16	57.3	64.4	86.4	93.5	99.4	3316.44	4609.58	59	134	464	9338	9519	34.84	48.43	0.62	1.41	4.87	98.1	100
DHX-incomp_Zp13-B-G58-Map3_reversed	Z. pseudotritici	Zp13	4787	14162	16	1	16	1	84.09	11.51	57.9	75.9	84.6	95.1	97.6	885.12	1169.9	48	100	402	1267	4787	18.49	24.44	1	2.09	8.4	26.47	100
DHX-incomp_Zp13-B-G90-Map3_reversed	Z. pseudotritici	Zp13	5480	34701	10	3	8	5	91.13	9.71	67.9	92.6	93.23	95.6	100	4337.62	1678.68	1604	3821	5434.5	5481	5485	79.15	30.63	29.27	69.73	99.17	100.02	100.09
DHX-incomp_Zp13-B-R170-Map18_reversed	Z. pseudotritici	Zp13	14599	170740	45	8	42	9	85.77	10.34	54.8	79.8	88.75	94.41	99	4065.24	6046.31	33	130	275.5	8703	14800	27.85	41.42	0.23	0.89	1.89	59.61	101.38
DHX-incomp_Zp13-B-R171-Map4	Z. pseudotritici	Zp13	2823	13248	8	1	7	2	85.23	13.87	62.9	67.4	92	94.41	95.2	1892.57	1106.46	197	440	2396	2809	2836	67.04	39.19	6.98	15.59	84.87	99.5	100.46
DHX-incomp_Zp13-B-R235-Map5	Z. pseudotritici	Zp13	7715	41096	32	4	32	4	83.38	11.06	58.4	80.9	84.6	90.4	98.7	1284.25	2766.39	34	99	115	164	7721	16.65	35.86	0.44	1.28	1.49	2.13	100.08
DHX-incomp_Zp13-B-R39-Map3_reversed	Z. pseudotritici	Zp13	4913	18612	21	3	21	3	76.25	12.54	56.8	69.3	71.9	88.9	96.7	886.29	1678.94	24	72	311	402	4914	18.04	34.17	0.49	1.47	6.33	8.18	100.02
DMX-incomp_Zp13-B-P13.16-Map5	Z. pseudotritici	Zp13	11352	126036	20	8	17	11	92.87	5.64	79.9	91.8	94.3	97.1	97.3	7413.88	5598.52	32	52	11290	11352	11784	65.31	49.32	0.28	0.46	99.45	100	103.81
DMX-incomp_Zp13-B-R18-Map20	Z. pseudotritici	Zp13	11266	128763	52	6	48	8	93.15	6.57	76.6	88.65	95.5	100	100	2682.56	4366.81	25	28	38	4464	11220	23.81	38.76	0.22	0.25	0.34	39.62	99.59
DMX-incomp_Zp13-B-R32-Map20	Z. pseudotritici	Zp13	12049	209186	42	12	35	14	91.42	6.89	69	86	92.3	97.5	98.1	5977.77	5662.78	34	59	3569	12034	12057	49.61	47	0.28	0.49	29.62	99.88	100.07
DMX-incomp_Zp13-B-R35-Map20	Z. pseudotritici	Zp13	20769	771718	77	20	50	32	94.25	6.52	68.6	93.03	97.28	97.5	100	15434.4	7811.58	71	9942	20761	20768	20950	74.31	37.61	0.34	47.87	99.96	100	100.87
DMX-incomp_Zp13-B-R40-Map3	Z. pseudotritici	Zp13	11775	23879	8	1900-01-02	8	2	89.01	10.65	65.9	89.1	90.15	98.6	98.7	2984.88	5429.45	28	46	48.5	11776	11787	25.35	46.11	0.24	0.39	0.41	100.01	100.1
DXX_Zp13-B-G138-Map10_reversed	Z. pseudotritici	Zp13	8445	16446	43	1	39	1	78.5	6.55	68.36	73.3	77.1	82.1	95.9	421.69	1298.43	48	87	125	352	8255	4.99	15.38	0.57	1.03	1.48	4.17	97.75
DXX-MITE_Zp13-B-G293-Map4	Z. pseudotritici	Zp13	501	2966	6	1900-01-06	6	6	95.5	6.97	86.5	86.5	100	100	100	494.33	7.26	484	486	499	499	499	98.67	1.45	96.61	97.01	99.6	99.6	99.6
DXX-MITE_Zp13-B-G302-Map4	Z. pseudotritici	Zp13	581	2331	4	4	4	4	99.23	1.42	97.1	99.8	99.9	100	100	582.75	4.86	580	580	580.5	590	590	100.3	0.84	99.83	99.83	99.91	101.55	101.55
DXX-MITE_Zp13-B-G306-Map4	Z. pseudotritici	Zp13	620	2514	5	4	5	4	96.74	6.56	85	99.5	99.7	99.7	99.8	502.8	258.72	40	617	618	619	620	81.1	41.73	6.45	99.52	99.68	99.84	100
DXX-MITE_Zp13-B-P38.2-Map5	Z. pseudotritici	Zp13	652	3203	5	5	5	5	99.34	0.51	98.7	98.9	99.5	99.8	99.8	640.6	19.92	620	620	648	650	665	98.25	3.06	95.09	95.09	99.39	99.69	101.99
DXX-MITE_Zp13-B-P42.35-Map3	Z. pseudotritici	Zp13	611	3275	11	3	10	3	90.65	6.06	79.02	88.1	89.5	94.9	99.5	327.5	266.19	41	47	227.5	609	685	53.6	43.57	6.71	7.69	37.23	99.67	112.11
DXX-MITE_Zp13-B-R175-Map3	Z. pseudotritici	Zp13	564	1124	2	2	2	2	95.65	6.15	91.3	91.3	95.65	100	100	562	2.83	560	560	562	564	564	99.65	0.5	99.29	99.29	99.65	100	100
DXX-MITE_Zp13-B-R194-Map4	Z. pseudotritici	Zp13	639	3196	6	4	6	4	93.07	5.49	84.9	88.2	94.55	96.5	99.7	532.67	245.44	34	604	624.5	639	670	83.36	38.41	5.32	94.52	97.73	100	104.85
DTX-comp_Zp13-B-R183-Map4_reversed	Z. pseudotritici	Zp13	2208	20893	17	4	13	6	82.46	10.72	71.17	74.71	77.5	95.9	98.3	1607.15	732.98	233	1189	1896	2173	2208	72.79	33.2	10.55	53.85	85.87	98.41	100
DTX-comp_Zp13-B-R85-Map3	Z. pseudotritici	Zp13	3043	32225	34	6	29	10	81.6	6.7	73.7	76.6	80	83.43	98.7	1111.21	1391.15	25	115	154	2950	3043	36.52	45.72	0.82	3.78	5.06	96.94	100
DTX-comp_Zp13-B-R99-Map4	Z. pseudotritici	Zp13	2190	25364	17	9	15	9	82.02	7.9	64.05	78.9	80.6	85.9	97.1	1690.93	914.05	26	1008	2188	2206	2452	77.21	41.74	1.19	46.03	99.91	100.73	111.96
DTX-incomp_Zp13-B-G117-Map3	Z. pseudotritici	Zp13	7780	43936	20	1	19	1	90.96	5.2	80.8	89.2	89.8	95.2	97.3	2312.42	2031.71	37	154	2512	3374	7840	29.72	26.11	0.48	1.98	32.29	43.37	100.77
DTX-incomp_Zp13-B-G194-Map9	Z. pseudotritici	Zp13	12165	100185	26	5	23	5	87.32	8.8	66.8	81.7	89	96.3	98	4355.87	5315.07	60	124	646	11532	12490	35.81	43.69	0.49	1.02	5.31	94.8	102.67
DTX-incomp_Zp13-B-P25.14-Map9	Z. pseudotritici	Zp13	1552	36057	28	20	27	20	96.41	7.53	72.3	98.6	99.3	99.5	99.8	1336.89	416.67	143	1464	1542	1546	1606	86.14	26.85	9.21	94.33	99.36	99.61	103.48
DTX-incomp_Zp13-B-P3.31-Map19	Z. pseudotritici	Zp13	8253	200148	33	20	29	23	96.41	2.57	87.8	96	96.9	98.3	98.5	6901.66	2836.35	33	8232	8234	8242	8247	83.63	34.37	0.4	99.75	99.77	99.87	99.93
DTX-incomp_Zp13-B-P39.1-Map3	Z. pseudotritici	Zp13	5342	42468	27	3	19	6	77.7	13.15	62.2	67.1	73.1	88.21	97.7	2235.16	2277.39	50	174	852	5297	5408	41.84	42.63	0.94	3.26	15.95	99.16	101.24
DTX-incomp_Zp13-B-P8.1-Map20	Z. pseudotritici	Zp13	5458	126065	46	22	41	22	88.78	11.66	59.91	80.7	97.1	98.4	98.8	3074.76	2573.52	34	66	5386	5417	5443	56.33	47.15	0.62	1.21	98.68	99.25	99.73
DTX-incomp_Zp13-B-R105-Map13	Z. pseudotritici	Zp13	5447	40086	24	3	21	4	80.68	11.98	64.4	69.4	75.6	90.85	97.3	1908.86	2244.09	47	116	687	4366	5441	35.04	41.2	0.86	2.13	12.61	80.15	99.89
DTX-incomp_Zp13-B-R115-Map3	Z. pseudotritici	Zp13	3157	12394	22	2	22	2	79.2	8.85	68.6	74.4	75	81.7	99.6	563.36	870.66	45	111	259.5	467	3161	17.84	27.58	1.43	3.52	8.22	14.79	100.13
DTX-incomp_Zp13-B-R149-Map3_reversed	Z. pseudotritici	Zp13	2779	27623	46	1900-01-06	45	7	80.64	5.85	70.1	77.3	78.6	82.1	97.9	613.84	1009.04	34	71	83	728	2831	22.09	36.31	1.22	2.55	2.99	26.2	101.87
DTX-incomp_Zp13-B-R157-Map3_reversed	Z. pseudotritici	Zp13	1316	4425	6	3	6	3	83.47	11.06	73	74.1	80.25	93.2	100	737.5	627.2	88	204	750.5	1316	1316	56.04	47.66	6.69	15.5	57.03	100	100
DTX-incomp_Zp13-B-R167-Map3	Z. pseudotritici	Zp13	2368	12528	25	3	25	3	80.79	8.34	72.5	74.5	78.2	84.6	99.7	501.12	714.28	38	142	318	376	2368	21.16	30.16	1.6	6	13.43	15.88	100
DTX-incomp_Zp13-B-R2-Map20	Z. pseudotritici	Zp13	9340	134889	55	5	42	9	90.63	5.74	77.6	85.63	93.13	95.25	96.5	3214.12	3790.46	40	107	764	6163	9356	34.41	40.58	0.43	1.15	8.18	65.99	100.17
DTX-incomp_Zp13-B-R20-Map20	Z. pseudotritici	Zp13	7919	124873	60	1900-01-04	46	12	87.52	6.6	71.3	82.5	86.8	93	97.4	2714.63	3360.5	22	75	591.5	7767	7941	34.28	42.44	0.28	0.95	7.47	98.08	100.28
DTX-incomp_Zp13-B-R24-Map4	Z. pseudotritici	Zp13	899	7300	9	8	9	8	89.72	5.97	81.3	86	89.4	91.9	98.5	811.11	256.34	128	890	896	900	916	90.22	28.51	14.24	99	99.67	100.11	101.89
DTX-incomp_Zp13-B-R3-Map3	Z. pseudotritici	Zp13	3090	16609	26	1900-01-04	26	4	79.49	9.68	59.6	72.9	78.45	82.8	99.1	638.81	1092.48	22	125	131.5	229	3090	20.67	35.36	0.71	4.05	4.26	7.41	100
DTX-incomp_Zp13-B-R51-Map3_reversed	Z. pseudotritici	Zp13	2018	11680	19	3	19	3	82.52	6.46	74.5	78.5	80.3	83.3	96.7	614.74	834.78	64	106	120	1328	2255	30.46	41.37	3.17	5.25	5.95	65.81	111.74
DTX-incomp_Zp13-B-R62-Map7	Z. pseudotritici	Zp13	5425	50661	31	6	27	7	82.28	13.11	55.9	72.2	85.8	95.1	98.1	1876.33	2378.46	31	80	249	5352	5470	34.59	43.84	0.57	1.47	4.59	98.65	100.83
noCat_Zp13-B-R108-Map20	Z. pseudotritici	Zp13	23973	202613	27	3	22	4	89.57	9.74	58.9	88	94.35	95.77	96.5	9209.86	9134.55	31	248	8360.5	14497	24011	38.42	38.1	0.13	1.03	34.87	60.47	100.16
DHX-incomp_Arg00-B-G132-Map14	Z. tritici Arg00	Arg00	5658	47155	18	7	15	7	94.45	3.12	86.4	93.6	95.6	96.43	97.4	3149.27	2456	32	43	3243	5452	5625	55.66	43.41	0.57	0.76	57.32	96.36	99.42
DHX-incomp_Arg00-B-G168-Map5_reversed	Z. tritici Arg00	Arg00	7029	39299	46	1	46	1	82.21	10.93	58.5	73.7	81.3	93.5	98.2	861.48	1568.43	27	171	277	639	7027	12.26	22.31	0.38	2.43	3.94	9.09	99.97
DHX-incomp_Arg00-B-G205-Map11	Z. tritici Arg00	Arg00	8013	185018	58	15	53	15	95.65	4.49	76.2	96	96.7	97.2	100	3496.98	3780.45	25	65	631	7948	8043	43.64	47.18	0.31	0.81	7.87	99.19	100.37
DHX-incomp_Arg00-B-P29.14-Map3_reversed	Z. tritici Arg00	Arg00	14604	91031	33	4	26	5	88.54	6.21	76.3	83.86	88.6	91.8	98.2	3504.58	5615.29	27	133	426	3351	14604	24	38.45	0.18	0.91	2.92	22.95	100
DHX-incomp_Arg00-B-R166-Map6_reversed	Z. tritici Arg00	Arg00	8472	35951	27	3	26	3	87.32	8.76	67.51	82.8	88.5	94.3	97.7	1382.73	2790.69	27	80	114	560	8499	16.32	32.94	0.32	0.94	1.35	6.61	100.32
DHX-incomp_Arg00-B-R27-Map20_reversed	Z. tritici Arg00	Arg00	14730	225654	35	14	33	14	88.64	10.09	57.4	82.4	91.15	97	97.8	6838	7023.69	31	136	4597	14598	14728	46.42	47.68	0.21	0.92	31.21	99.1	99.99
DMX-incomp_Arg00-B-R140-Map4	Z. tritici Arg00	Arg00	11197	133950	42	7	33	10	85.97	6.81	69.8	82.1	85.73	88.7	100	4059.09	5011.64	25	54	271	10925	11197	36.25	44.76	0.22	0.48	2.42	97.57	100
DTX-comp_Arg00-B-G395-Map3_reversed	Z. tritici Arg00	Arg00	2207	26261	22	1900-01-04	18	7	84.97	8.12	75.62	77.6	81.74	93.8	97.7	1458.94	845.3	39	487	1720.5	2157	2212	66.11	38.3	1.77	22.07	77.96	97.73	100.23
DTX-comp_Arg00-B-R122-Map8	Z. tritici Arg00	Arg00	3400	19369	24	2	24	2	85.56	12.01	68.7	73.4	86.1	98.1	99.4	807.04	1085.65	32	136	292	1370	3400	23.74	31.93	0.94	4	8.59	40.29	100
DTX-comp_Arg00-B-R134-Map9	Z. tritici Arg00	Arg00	3563	36464	23	4	17	5	83.94	10	72.3	74.96	81.2	92.13	97.9	2144.94	1319.17	110	743	2407	3429	3561	60.2	37.02	3.09	20.85	67.56	96.24	99.94
DTX-comp_Arg00-B-R156-Map3	Z. tritici Arg00	Arg00	3509	29476	18	1900-01-04	13	5	81.59	13.07	65.96	68.6	83	91.7	98.4	2267.38	1522.2	39	280	2874	3507	3533	64.62	43.38	1.11	7.98	81.9	99.94	100.68
DTX-comp_Arg00-B-R317-Map8_reversed	Z. tritici Arg00	Arg00	4466	29824	36	3	36	3	82.3	7.67	71.9	77.8	80.2	83.6	98.1	828.44	1503.19	32	126	126.5	289	4480	18.55	33.66	0.72	2.82	2.83	6.47	100.31
DTX-comp_Arg00-B-R44-Map7	Z. tritici Arg00	Arg00	2146	46052	39	15	33	17	82.18	7.22	69.95	78.1	79.6	85.7	96.8	1395.52	926.3	49	391	2086	2191	2208	65.03	43.16	2.28	18.22	97.2	102.1	102.89
DTX-incomp_Arg00-B-G111-Map10	Z. tritici Arg00	Arg00	5458	33089	15	5	15	5	88.33	7.84	77.6	81.1	90.1	96.2	97.3	2205.93	2642.54	32	66	81	5427	5455	40.42	48.42	0.59	1.21	1.48	99.43	99.95
DTX-incomp_Arg00-B-G138-Map9	Z. tritici Arg00	Arg00	5365	21722	11	1900-01-03	10	4	89.12	8.51	70.5	83.7	89.65	97.1	97.5	2172.2	2713.47	47	48	115.5	5325	5337	40.49	50.58	0.88	0.89	2.15	99.25	99.48
DTX-incomp_Arg00-B-G142-Map8	Z. tritici Arg00	Arg00	5459	89182	45	8	43	9	86.92	11.2	64.4	73.9	91.3	96.4	100	2074	2337.9	26	34	701	5009	5467	37.99	42.83	0.48	0.62	12.84	91.76	100.15
DTX-incomp_Arg00-B-G146-Map8	Z. tritici Arg00	Arg00	5386	27576	11	4	11	4	91.04	8.56	75.8	84.8	96.4	97.1	97.8	2506.91	2553.13	44	83	1022	5344	5391	46.54	47.4	0.82	1.54	18.98	99.22	100.09
DTX-incomp_Arg00-B-G3-Map14	Z. tritici Arg00	Arg00	4220	50447	62	1900-01-04	58	4	80.73	9.59	63.44	73.2	76.95	90	100	870.14	1338.94	27	127	226	682	4197	20.62	31.73	0.64	3.01	5.36	16.16	99.45
DTX-incomp_Arg00-B-G355-Map3	Z. tritici Arg00	Arg00	1186	3117	5	1	5	1	87.24	9.79	72	86	87.9	91.7	98.6	623.4	502.25	86	139	673	1037	1182	52.56	42.35	7.25	11.72	56.75	87.44	99.66
DTX-incomp_Arg00-B-G366-Map3_reversed	Z. tritici Arg00	Arg00	1396	11148	19	7	19	7	81.56	8.37	67.9	76.9	79	85.3	98.7	586.74	620.96	55	66	263	1361	1396	42.03	44.48	3.94	4.73	18.84	97.49	100
DTX-incomp_Arg00-B-P20.22-Map4_reversed	Z. tritici Arg00	Arg00	2198	19346	19	7	18	7	85.05	9.36	72.6	76.7	82.8	95	98.1	1076.22	1033.36	25	38	849.5	2196	2202	48.96	47.01	1.14	1.73	38.65	99.91	100.18
DTX-incomp_Arg00-B-P34.9-Map3_reversed	Z. tritici Arg00	Arg00	1639	8553	11	3	9	5	84.69	12.44	69.4	72.76	89.2	98.1	98.2	950.33	804.08	36	119	1584	1636	1639	57.98	49.06	2.2	7.26	96.64	99.82	100
DTX-incomp_Arg00-B-P38.5-Map3_reversed	Z. tritici Arg00	Arg00	7546	23096	6	3	5	3	93.69	9.41	78.96	89.5	100	100	100	4619.2	4008.18	38	424	7543	7544	7547	61.21	53.12	0.5	5.62	99.96	99.97	100.01
DTX-incomp_Arg00-B-P47.0-Map3	Z. tritici Arg00	Arg00	5361	17465	5	3	5	3	90.66	8.91	77.1	86.1	95.6	96.4	98.1	3493	2614.68	116	1204	5357	5379	5409	65.16	48.77	2.16	22.46	99.93	100.34	100.9
DTX-incomp_Arg00-B-R103-Map3_reversed	Z. tritici Arg00	Arg00	1636	3863	10	2	10	2	87.42	7.57	71.6	83.3	87.95	90.3	100	386.3	662.62	44	48	58.5	211	1645	23.61	40.5	2.69	2.93	3.58	12.9	100.55
DTX-incomp_Arg00-B-R105-Map3_reversed	Z. tritici Arg00	Arg00	3024	13018	11	3	10	3	88.9	8.24	79.8	80.5	89	96.7	98.6	1301.8	1455.13	31	72	432	3013	3031	43.05	48.12	1.03	2.38	14.29	99.64	100.23
DTX-incomp_Arg00-B-R114-Map4_reversed	Z. tritici Arg00	Arg00	1395	2302	5	1	5	1	88.92	10.15	77.5	78.4	94.5	95.4	98.8	460.4	532.49	94	159	324	330	1395	33	38.17	6.74	11.4	23.23	23.66	100
DTX-incomp_Arg00-B-R133-Map7	Z. tritici Arg00	Arg00	4097	23285	37	2	33	3	84.32	9.14	71.5	76.2	80	95.1	97.8	705.61	1376.56	39	83	143	188	4133	17.22	33.6	0.95	2.03	3.49	4.59	100.88
DTX-incomp_Arg00-B-R137-Map7_reversed	Z. tritici Arg00	Arg00	3364	30431	24	2	19	4	85.13	11.55	71.1	73.8	88	97.4	100	1601.68	1289.57	36	308	1545	3111	3464	47.61	38.33	1.07	9.16	45.93	92.48	102.97
DTX-incomp_Arg00-B-R15-Map3_reversed	Z. tritici Arg00	Arg00	688	1340	3	1	3	1	85.57	12.82	75.5	75.5	81.2	100	100	446.67	255.45	175	175	483	682	682	64.92	37.13	25.44	25.44	70.2	99.13	99.13
DTX-incomp_Arg00-B-R157-Map4	Z. tritici Arg00	Arg00	2940	9372	6	3	6	3	87.08	10.89	72.5	77.1	89.7	96.4	97.1	1562	1485.29	80	152	1636	2933	2935	53.13	50.52	2.72	5.17	55.65	99.76	99.83
DTX-incomp_Arg00-B-R18-Map3	Z. tritici Arg00	Arg00	2877	16942	16	2	14	3	80.98	8.88	69.6	73	80.65	85.5	100	1210.14	1202.38	120	248	381	2689	2877	42.06	41.79	4.17	8.62	13.24	93.47	100
DTX-incomp_Arg00-B-R247-Map5	Z. tritici Arg00	Arg00	2894	18927	15	1900-01-03	13	3	83.61	13.05	67.8	69.9	86.2	96.5	99.1	1455.92	962.15	62	972	1407	1712	2989	50.31	33.25	2.14	33.59	48.62	59.16	103.28
DTX-incomp_Arg00-B-R261-Map4	Z. tritici Arg00	Arg00	2915	14464	13	4	13	4	82.23	13.91	58.3	70.1	81.4	96.5	98.6	1112.62	1277.26	55	136	434	2885	2915	38.17	43.82	1.89	4.67	14.89	98.97	100
DTX-incomp_Arg00-B-R286-Map6	Z. tritici Arg00	Arg00	5370	31391	17	1900-01-03	16	4	86.04	9.79	70.9	85.1	87.75	94.65	98.6	1961.94	2408.35	35	152	233	5300	5370	36.54	44.85	0.65	2.83	4.34	98.7	100
DTX-incomp_Arg00-B-R294-Map3	Z. tritici Arg00	Arg00	3126	15690	9	2	7	4	89.68	8.59	77.46	78.17	92.1	97.8	97.9	2241.43	1459.6	40	177	3126	3136	3156	71.7	46.69	1.28	5.66	100	100.32	100.96
DTX-incomp_Arg00-B-R32-Map5	Z. tritici Arg00	Arg00	5425	27379	9	3	7	5	89.43	9.27	69.1	90.5	91.4	96	96.2	3911.29	2565.43	66	248	5373	5448	5459	72.1	47.29	1.22	4.57	99.04	100.42	100.63
DTX-incomp_Arg00-B-R320-Map3	Z. tritici Arg00	Arg00	2363	2363	1	1	1	1	100	0	100	100	100	100	100	2363	0	2363	2363	2363	2363	2363	100	0	100	100	100	100	100
DTX-incomp_Arg00-B-R33-Map7	Z. tritici Arg00	Arg00	5401	27402	10	4	10	4	93.91	4.47	84.2	94.8	95.25	96.8	97	2740.2	2598.45	39	66	2681.5	5350	5452	50.74	48.11	0.72	1.22	49.65	99.06	100.94
DTX-incomp_Arg00-B-R361-Map4	Z. tritici Arg00	Arg00	2731	13773	13	3	12	3	83.35	11.85	67.75	76	77.2	96.9	98.3	1147.75	1124.86	103	104	869	2731	2748	42.03	41.19	3.77	3.81	31.82	100	100.62
DTX-incomp_Arg00-B-R369-Map3	Z. tritici Arg00	Arg00	2955	7827	6	2	6	2	90.57	6.24	81.8	87.5	89.25	97.6	98	1304.5	1313.11	54	593	613	2965	2989	44.15	44.44	1.83	20.07	20.74	100.34	101.15
DTX-incomp_Arg00-B-R381-Map4	Z. tritici Arg00	Arg00	3702	43879	43	6	42	7	85.52	8.36	70.3	78.9	84.1	92.9	99	1044.74	1503.82	28	37	80.5	1901	3790	28.22	40.62	0.76	1	2.17	51.35	102.38
DTX-incomp_Arg00-B-R411-Map4	Z. tritici Arg00	Arg00	3412	11368	7	3	6	3	87.24	10.33	70.26	83	88	95.6	98.6	1894.67	1695.53	48	323	2058.5	3434	3446	55.53	49.69	1.41	9.47	60.33	100.64	101
DTX-incomp_Arg00-B-R43-Map3	Z. tritici Arg00	Arg00	2683	11700	8	2	8	2	82.91	11.43	71.7	74.5	76.75	96.3	97.2	1462.5	1028.63	324	396	1437	2683	2688	54.51	38.34	12.08	14.76	53.56	100	100.19
DTX-incomp_Arg00-B-R85-Map7	Z. tritici Arg00	Arg00	5430	33004	16	3	14	5	84.79	13.01	57	72.6	90.2	96.4	97.4	2357.43	2507.73	38	74	1046.5	5353	5397	43.41	46.18	0.7	1.36	19.27	98.58	99.39
DTX-incomp_Arg00-B-R86-Map3	Z. tritici Arg00	Arg00	1340	9568	10	5	8	7	84.35	8.8	76.3	77.52	81.99	96.8	97.5	1196	361.47	302	1312	1315	1339	1340	89.25	26.98	22.54	97.91	98.13	99.93	100
DTX-incomp_Arg00-B-R96-Map9	Z. tritici Arg00	Arg00	4022	47715	44	6	41	9	84.23	8.56	72.3	76.8	81.8	93.2	97.7	1163.78	1633.85	31	102	155	2096	4148	28.94	40.62	0.77	2.54	3.85	52.11	103.13
DTX-incomp_Arg00-B-R97-Map9	Z. tritici Arg00	Arg00	5469	80498	38	8	32	9	83.5	8.76	60	79.3	85.84	88.1	97.4	2515.56	2432.07	25	54	2098	5381	5498	46	44.47	0.46	0.99	38.36	98.39	100.53
DXX_Arg00-B-G204-Map20_reversed	Z. tritici Arg00	Arg00	7948	269920	38	34	38	34	96.82	2.97	86.5	95.5	96.95	99.5	99.5	7103.16	2447.56	29	7928	7930	7935	7940	89.37	30.79	0.36	99.75	99.77	99.84	99.9
DXX_Arg00-B-P40.5-Map5_reversed	Z. tritici Arg00	Arg00	7857	39356	6	5	6	5	97.57	5.34	86.7	98.8	99.95	100	100	6559.33	3169.8	89	7851	7853.5	7854	7855	83.48	40.34	1.13	99.92	99.96	99.96	99.97
DXX-MITE_Arg00-B-G236-Map3	Z. tritici Arg00	Arg00	346	10883	50	13	49	14	83.51	6.13	70.1	79.4	82.5	86.1	100	222.1	105.65	44	157	205	333	360	64.19	30.54	12.72	45.38	59.25	96.24	104.05
DXX-MITE_Arg00-B-G254-Map3	Z. tritici Arg00	Arg00	426	6272	24	7	24	7	80.78	8.88	69.9	74.3	78.65	86.5	99.5	261.33	159.32	21	126	282	418	427	61.35	37.4	4.93	29.58	66.2	98.12	100.23
DXX-MITE_Arg00-B-G266-Map3	Z. tritici Arg00	Arg00	497	2217	5	4	5	4	87.2	15.08	69.7	71.7	97.8	98.2	98.6	443.4	104.02	258	475	491	496	497	89.22	20.93	51.91	95.57	98.79	99.8	100
DXX-MITE_Arg00-B-G276-Map4	Z. tritici Arg00	Arg00	639	3292	8	4	8	4	93.04	6.19	81.7	91.2	95.95	97.5	98.7	411.5	273.34	60	123	572.5	625	653	64.4	42.78	9.39	19.25	89.59	97.81	102.19
DXX-MITE_Arg00-B-P21.21-Map10	Z. tritici Arg00	Arg00	495	7728	28	12	28	12	88.35	6.89	76.1	83	87.15	96	97.5	276	193.83	50	109	151	490	515	55.76	39.16	10.1	22.02	30.51	98.99	104.04
DXX-MITE_Arg00-B-P39.6-Map5	Z. tritici Arg00	Arg00	673	3126	8	4	8	4	89.35	10.95	68.2	86.2	90.65	99.5	99.7	390.75	304.98	57	86	456.5	671	671	58.06	45.32	8.47	12.78	67.83	99.7	99.7
DXX-MITE_Arg00-B-P43.3-Map4	Z. tritici Arg00	Arg00	361	1810	5	5	5	5	99.36	0.29	98.9	99.4	99.4	99.4	99.7	362	5.15	358	360	360	361	371	100.28	1.43	99.17	99.72	99.72	100	102.77
DXX-MITE_Arg00-B-R403-Map3	Z. tritici Arg00	Arg00	497	2662	9	1900-01-03	9	3	89.18	7.68	79.7	83.7	87.5	97.4	99	295.78	241.13	33	48	470	497	535	59.51	48.52	6.64	9.66	94.57	100	107.65
noCat_Arg00-B-G149-Map20	Z. tritici Arg00	Arg00	6224	56247	23	6	23	6	89.46	9.02	74.5	76.7	95.2	96.4	97.9	2445.52	2832.94	30	103	202	5922	6209	39.29	45.52	0.48	1.65	3.25	95.15	99.76
noCat_Arg00-B-G324-Map11	Z. tritici Arg00	Arg00	879	46634	62	18	60	18	90.36	2.83	85.3	88.2	90.05	92.9	95.1	777.23	159.37	82	781	801.5	838	893	88.42	18.13	9.33	88.85	91.18	95.34	101.59
noCat_Arg00-B-P6.32-Map11	Z. tritici Arg00	Arg00	13735	309733	59	15	55	17	91.49	8.35	67.5	91.91	95.4	96.1	100	5631.51	6076.82	28	140	1907	13633	13727	41	44.24	0.2	1.02	13.88	99.26	99.94
noCat_Arg00-B-R36-Map20	Z. tritici Arg00	Arg00	880	105277	139	1900-01-15	136	16	91.71	2.3	83.8	90.2	91.6	93.42	96.2	774.1	118.84	31	766	784.5	814	930	87.97	13.5	3.52	87.05	89.15	92.5	105.68
noCat_Arg00-B-R9-Map14	Z. tritici Arg00	Arg00	894	4034	6	1	6	1	90.62	4.96	84.9	86.3	90.25	94.1	97.9	672.33	317.6	42	652	823	839	855	75.21	35.53	4.7	72.93	92.06	93.85	95.64
noCat_Arg00-B-R95-Map12	Z. tritici Arg00	Arg00	5423	45271	33	2	28	2	84.3	9.72	69.7	76	83.57	94.8	98	1616.82	1817.86	34	236	834	3356	5290	29.81	33.52	0.63	4.35	15.38	61.88	97.55
RIX-comp_Arg00-B-G133-Map20	Z. tritici Arg00	Arg00	5658	549904	158	67	154	69	95.83	2.53	81.5	95.1	96.49	97.3	98.8	3570.81	2203.36	28	1386	4932.5	5577	5769	63.11	38.94	0.49	24.5	87.18	98.57	101.96
RIX-comp_Arg00-B-R250-Map4_reversed	Z. tritici Arg00	Arg00	12138	286439	110	4	91	4	88.83	7.74	71.4	85.7	91.7	94.4	100	3148.08	4074.09	25	240	675	5788	12270	25.94	33.56	0.21	1.98	5.56	47.68	101.09
RIX-comp_Arg00-B-R313-Map3	Z. tritici Arg00	Arg00	3408	25987	16	5	15	5	81.91	10.8	65.9	72.1	81	93.6	98.3	1732.47	1420.87	29	188	1632	3401	3407	50.84	41.69	0.85	5.52	47.89	99.79	99.97
RLX-comp_Arg00-B-G162-Map20_reversed	Z. tritici Arg00	Arg00	6430	173343	73	21	65	21	93.58	6.03	57	93.13	95	96	100	2668.05	2842.41	25	275	684	6289	6393	41.49	44.21	0.39	4.28	10.64	97.81	99.42
RLX-comp_Arg00-B-G182-Map5_reversed	Z. tritici Arg00	Arg00	6723	48667	15	5	14	6	88.59	13.86	60.7	83.77	95.95	97.3	97.9	3476.21	3200.23	40	240	3369.5	6719	6724	51.71	47.6	0.59	3.57	50.12	99.94	100.01
RLX-comp_Arg00-B-G208-Map14_reversed	Z. tritici Arg00	Arg00	8601	93453	20	1900-01-06	18	7	92.71	4.2	78.6	93	94.18	94.8	95.8	5191.83	3563.5	25	972	7129	8462	8475	60.36	41.43	0.29	11.3	82.89	98.38	98.54
RLX-comp_Arg00-B-G72-Map20	Z. tritici Arg00	Arg00	6970	129972	36	12	33	12	89.01	10.26	58	81.8	94.7	96.1	97.2	3938.55	3431.35	31	376	4433	6956	13921	56.51	49.23	0.44	5.39	63.6	99.8	199.73
RLX-comp_Arg00-B-P15.26-Map12	Z. tritici Arg00	Arg00	6838	304287	86	26	74	30	92.87	6.2	58.4	93.7	94.5	95	97	4111.99	2691.85	29	1247	4419.5	6803	6846	60.13	39.37	0.42	18.24	64.63	99.49	100.12
RLX-comp_Arg00-B-R13-Map9	Z. tritici Arg00	Arg00	7148	53813	23	5	21	7	86.96	8.03	65.1	82.1	86.3	93.1	97	2562.52	3366.33	29	52	117	7117	7165	35.85	47.09	0.41	0.73	1.64	99.57	100.24
RLX-comp_Arg00-B-R237-Map8	Z. tritici Arg00	Arg00	6021	26714	21	3	20	3	86.14	9.76	72	80.4	89.45	95	99.4	1335.7	2158.07	31	78	214	2537	6017	22.18	35.84	0.51	1.3	3.55	42.14	99.93
RLX-comp_Arg00-B-R7-Map20	Z. tritici Arg00	Arg00	6936	747863	172	83	146	95	93.05	7.18	55.6	92.59	95	96.6	100	5170.08	2880.75	24	3134	6927	6928	13858	74.54	41.53	0.35	45.18	99.87	99.88	199.8
RLX-comp_Arg00-B-R90-Map12_reversed	Z. tritici Arg00	Arg00	13816	150534	47	3	37	5	93.11	3.55	80.86	93.09	93.8	95.23	96.8	4068.49	4934.26	31	240	1955	4383	13954	29.45	35.71	0.22	1.74	14.15	31.72	101
RLX-incomp_Arg00-B-G136-Map20	Z. tritici Arg00	Arg00	5393	11408	9	1900-01-01	9	1	87	14.43	56.9	86.4	93.3	95.6	100	1267.56	2225.72	25	39	80	544	5253	23.5	41.27	0.46	0.72	1.48	10.09	97.4
RLX-incomp_Arg00-B-G180-Map20_reversed	Z. tritici Arg00	Arg00	6595	154285	51	5	49	5	96.07	5.28	60.7	96.2	97.2	97.5	98.3	3148.67	2095.39	179	654	3402	3405	6594	47.74	31.77	2.71	9.92	51.58	51.63	99.98
RLX-incomp_Arg00-B-G200-Map20_reversed	Z. tritici Arg00	Arg00	8323	176138	40	1900-01-14	34	16	93.79	8.28	57.1	95.4	95.95	96.3	97	5180.53	3321.71	98	1853	6409	8265	8494	62.24	39.91	1.18	22.26	77	99.3	102.05
RLX-incomp_Arg00-B-G203-Map6_reversed	Z. tritici Arg00	Arg00	9498	113118	33	5	26	7	91.25	6.54	75.8	87.13	94.98	96.3	97.3	4350.69	3967.49	49	835	2219	9329	9498	45.81	41.77	0.52	8.79	23.36	98.22	100
RLX-incomp_Arg00-B-G220-Map3	Z. tritici Arg00	Arg00	11158	82041	32	3	27	6	77.73	13.43	55.7	67.5	76.3	87.9	97.8	3038.56	4498.78	37	91	754	3303	11247	27.23	40.32	0.33	0.82	6.76	29.6	100.8
RLX-incomp_Arg00-B-G223-Map3	Z. tritici Arg00	Arg00	14632	168974	49	6	44	6	85.88	10.18	67.1	77	91.33	94.6	96.8	3840.32	5271.83	49	175	678.5	6569	14718	26.25	36.03	0.33	1.2	4.64	44.89	100.59
RLX-incomp_Arg00-B-G381-Map3_reversed	Z. tritici Arg00	Arg00	1995	12169	17	2	17	2	85.05	10.62	69.1	73.5	86.1	92.8	100	715.82	521.41	141	563	567	568	1995	35.88	26.14	7.07	28.22	28.42	28.47	100
RLX-incomp_Arg00-B-G393-Map3	Z. tritici Arg00	Arg00	2294	25473	17	9	17	9	82.73	9.85	67	74.7	83.8	91.4	96.5	1498.41	947.23	85	577	2267	2318	2401	65.32	41.29	3.71	25.15	98.82	101.05	104.66
RLX-incomp_Arg00-B-G463-Map20	Z. tritici Arg00	Arg00	3219	3833	5	1	5	1	92.36	8.66	77.7	92.3	94.4	98.1	99.3	766.6	1337.45	24	24	108	550	3127	23.81	41.55	0.75	0.75	3.36	17.09	97.14
RLX-incomp_Arg00-B-P0.37-Map11_reversed	Z. tritici Arg00	Arg00	6877	421236	108	39	96	43	94.56	2.5	75	94.13	95.1	95.7	96.4	4387.98	2612.87	82	2013	5379	6802	6988	63.81	37.99	1.19	29.27	78.22	98.91	101.61
RLX-incomp_Arg00-B-P2.35-Map20_reversed	Z. tritici Arg00	Arg00	6377	363539	70	49	68	51	93.56	4.32	84.3	93.2	95.75	96.4	97.5	5346.16	1951.82	36	6119	6356	6360	6376	83.84	30.61	0.56	95.95	99.67	99.73	99.98
RLX-incomp_Arg00-B-R132-Map13_reversed	Z. tritici Arg00	Arg00	13917	353193	56	10	47	11	93.24	2.99	83.7	92.8	94	95	97.1	7514.87	5227.82	82	2176	6302	12959	13920	54	37.56	0.59	15.64	45.28	93.12	100.02
RLX-incomp_Arg00-B-R155-Map13_reversed	Z. tritici Arg00	Arg00	6792	57941	36	1	30	1	91	8.34	67.4	86.3	93.72	97.2	98.5	1931.77	2052.49	28	247	975.5	2719	6792	28.44	30.22	0.41	3.64	14.36	40.03	100
RLX-incomp_Arg00-B-R16-Map16_reversed	Z. tritici Arg00	Arg00	8374	77034	33	4	30	5	89.27	10.72	56.4	85.7	92.9	96.8	98.6	2567.8	3273.51	30	104	765	3684	8377	30.66	39.09	0.36	1.24	9.14	43.99	100.04
RLX-incomp_Arg00-B-R19-Map13	Z. tritici Arg00	Arg00	13771	122238	35	1	31	1	93.47	3.68	82.5	92.8	94.5	95.3	97.9	3943.32	3620.25	47	518	3299	6180	13330	28.63	26.29	0.34	3.76	23.96	44.88	96.8
RLX-incomp_Arg00-B-R191-Map3_reversed	Z. tritici Arg00	Arg00	10680	43267	18	2	18	2	77.55	12.23	62	69.3	71.6	90	97.6	2403.72	3969.58	59	124	456.5	828	10695	22.51	37.17	0.55	1.16	4.27	7.75	100.14
RLX-incomp_Arg00-B-R192-Map20_reversed	Z. tritici Arg00	Arg00	13584	158650	64	1	46	2	90.79	8.49	71.9	85.4	95.44	96.54	98.1	3456.5	4028.34	79	328	1642	4742	13708	25.45	29.66	0.58	2.41	12.09	34.91	100.91
RLX-incomp_Arg00-B-R263-Map3	Z. tritici Arg00	Arg00	4218	20198	19	2	16	2	79.61	7.72	73.3	76.3	76.7	80.5	100	1262.38	1640.55	52	261	261	3562	4226	29.93	38.89	1.23	6.19	6.19	84.45	100.19
RLX-incomp_Arg00-B-R264-Map3	Z. tritici Arg00	Arg00	832	3075	6	2	6	2	86.38	9.74	77.7	80.4	81.3	97.6	100	512.5	267.97	253	253	458.5	818	834	61.6	32.21	30.41	30.41	55.11	98.32	100.24
RLX-incomp_Arg00-B-R273-Map3	Z. tritici Arg00	Arg00	5568	58118	49	4	44	5	75.85	13.61	55.1	66.1	72.45	88.6	99.7	1320.86	1926.88	28	124	199.5	1229	5573	23.72	34.61	0.5	2.23	3.58	22.07	100.09
RLX-incomp_Arg00-B-R29-Map3_reversed	Z. tritici Arg00	Arg00	10800	53909	27	3	22	3	71.67	15.21	55	58.4	69.45	82.8	97.6	2450.41	3931.69	24	91	499.5	1228	10802	22.69	36.4	0.22	0.84	4.62	11.37	100.02
RLX-incomp_Arg00-B-R290-Map3_reversed	Z. tritici Arg00	Arg00	902	4033	12	2	12	2	81.23	12.32	65.8	70.5	78.65	95.2	100	336.08	258.36	209	219	223.5	277	889	37.26	28.64	23.17	24.28	24.78	30.71	98.56
RLX-incomp_Arg00-B-R291-Map3_reversed	Z. tritici Arg00	Arg00	3074	37989	42	8	40	10	83.45	7.76	68.5	79.1	82.55	87.9	100	949.73	1329.8	49	109	121	3038	3104	30.9	43.26	1.59	3.55	3.94	98.83	100.98
RLX-incomp_Arg00-B-R373-Map3	Z. tritici Arg00	Arg00	2999	31101	38	3	37	3	69.09	10.62	55.6	60.6	68.4	71.4	97.6	840.57	899.66	25	139	544	1153	3007	28.03	30	0.83	4.63	18.14	38.45	100.27
RLX-incomp_Arg00-B-R374-Map3	Z. tritici Arg00	Arg00	1245	16352	19	10	18	11	75.44	9.49	67.2	69	73.18	75.1	97.6	908.44	484.56	27	517	1215	1243	1245	72.97	38.92	2.17	41.53	97.59	99.84	100
RLX-incomp_Arg00-B-R376-Map4	Z. tritici Arg00	Arg00	5592	26406	12	2	11	2	85.42	15.41	59	69.04	95.2	97.6	98.3	2400.55	2095.73	105	125	2449	3437	5592	42.93	37.48	1.88	2.24	43.79	61.46	100
RLX-incomp_Arg00-B-R68-Map6_reversed	Z. tritici Arg00	Arg00	6619	27865	9	2	8	2	87.99	10.9	69.3	89.12	92.35	96.9	97	3483.12	2607.95	227	1424	3404.5	6615	6636	52.62	39.4	3.43	21.51	51.44	99.94	100.26
RXX-TRIM_Arg00-B-G317-Map4	Z. tritici Arg00	Arg00	926	3154	7	1900-01-02	7	2	88.99	10.51	66.3	88.6	90.8	96.5	96.7	450.57	397.5	35	98	345	926	926	48.66	42.93	3.78	10.58	37.26	100	100
RXX-TRIM_Arg00-B-R84-Map3	Z. tritici Arg00	Arg00	529	6459	20	1900-01-07	17	8	86.42	6.69	77.3	82.09	83.8	92.8	97.5	380	185.98	65	193	520	532	559	71.83	35.16	12.29	36.48	98.3	100.57	105.67
DHX-incomp_Aus01-B-G239-Map6_reversed	Z. tritici Aus01	Aus01	9281	118207	57	1	54	1	91	6.46	73.9	84.8	95.43	96.01	97.5	2189.02	2300.42	30	102	1159	4245	9275	23.59	24.79	0.32	1.1	12.49	45.74	99.94
DHX-incomp_Aus01-B-G546-Map3	Z. tritici Aus01	Aus01	3111	14539	21	2	17	3	79.1	12.9	64	68.74	72.9	92.9	97.7	855.24	1171.86	25	114	253	1272	3109	27.49	37.67	0.8	3.66	8.13	40.89	99.94
DHX-incomp_Aus01-B-P22.31-Map3	Z. tritici Aus01	Aus01	13691	278718	72	9	52	11	87.32	13.92	61.91	85.5	95	95.8	100	5359.96	5256.93	35	1358	2720.5	10433	13779	39.15	38.4	0.26	9.92	19.87	76.2	100.64
DHX-incomp_Aus01-B-R143-Map3_reversed	Z. tritici Aus01	Aus01	3536	16735	24	1900-01-02	21	4	81.46	11.04	58.8	75.31	80.8	90.5	97.6	796.9	1351.85	28	65	178	384	3566	22.54	38.23	0.79	1.84	5.03	10.86	100.85
DHX-incomp_Aus01-B-R178-Map4	Z. tritici Aus01	Aus01	3248	8402	5	2	5	2	93.08	8.6	77.9	95.6	95.9	96.9	99.1	1680.4	1570.89	77	114	1738	3234	3239	51.74	48.36	2.37	3.51	53.51	99.57	99.72
DMX-incomp_Aus01-B-P13.39-Map20	Z. tritici Aus01	Aus01	11180	344213	97	25	81	26	89.89	9.21	66.1	82.7	95.7	97.3	100	4249.6	5149.5	25	47	545	11161	11344	38.01	46.06	0.22	0.42	4.87	99.83	101.47
DMX-incomp_Aus01-B-R40-Map20	Z. tritici Aus01	Aus01	11511	242503	68	16	59	17	86.14	13.09	56.7	77.3	89.8	99.1	99.9	4110.22	5062.66	28	78	838	11508	11731	35.71	43.98	0.24	0.68	7.28	99.97	101.91
DTX-comp_Aus01-B-G162-Map3_reversed	Z. tritici Aus01	Aus01	4627	50406	34	4	24	6	75.96	11.74	57.4	68	73.15	81.17	100	2100.25	2033.84	23	462	658.5	4396	4671	45.39	43.96	0.5	9.98	14.23	95.01	100.95
DTX-comp_Aus01-B-G566-Map4	Z. tritici Aus01	Aus01	3262	50138	31	7	27	8	80.01	9.72	63.8	71.97	78.2	86.7	97.2	1856.96	1332.91	23	481	1952	3245	3319	56.93	40.86	0.71	14.75	59.84	99.48	101.75
DTX-comp_Aus01-B-G612-Map4_reversed	Z. tritici Aus01	Aus01	3201	22683	21	5	20	6	90.55	8.21	72.8	87	91.8	100	100	1134.15	1526.91	30	36	46	3199	3296	35.43	47.7	0.94	1.12	1.44	99.94	102.97
DTX-comp_Aus01-B-G613-Map3_reversed	Z. tritici Aus01	Aus01	3157	22801	16	4	14	4	80.44	12.21	66.37	71.2	75.95	85.7	100	1628.64	1217.01	28	649	1566	3155	3171	51.59	38.55	0.89	20.56	49.6	99.94	100.44
DTX-comp_Aus01-B-P47.8-Map16_reversed	Z. tritici Aus01	Aus01	3582	64612	22	17	22	17	94.8	9.78	73.5	99.3	99.85	100	100	2936.91	1314.57	52	3566	3570	3576	3579	81.99	36.7	1.45	99.55	99.66	99.83	99.92
DTX-comp_Aus01-B-R154-Map8_reversed	Z. tritici Aus01	Aus01	3652	21243	12	2	10	3	93.8	7.94	77.9	93.39	97.95	98.3	98.5	2124.3	1325.71	113	1131	2108	3648	3695	58.17	36.3	3.09	30.97	57.72	99.89	101.18
DTX-comp_Aus01-B-R159-Map12_reversed	Z. tritici Aus01	Aus01	2193	54483	42	14	39	16	82.41	10.08	68.2	75.6	77.5	95	100	1397	850.71	77	489	1711	2190	2421	63.7	38.79	3.51	22.3	78.02	99.86	110.4
DTX-comp_Aus01-B-R205-Map5_reversed	Z. tritici Aus01	Aus01	3410	21151	19	3	17	3	81.37	10.14	65.18	76.05	77.3	88.6	97.7	1244.18	1344.79	101	181	482	2321	3428	36.49	39.44	2.96	5.31	14.13	68.06	100.53
DTX-comp_Aus01-B-R22-Map16	Z. tritici Aus01	Aus01	2956	44443	59	12	49	13	86.43	10.19	56.9	78.36	86.9	97.05	99.2	907.86	1223.15	31	108	155	2896	2960	30.71	41.38	1.05	3.65	5.24	97.97	100.14
DTX-comp_Aus01-B-R41-Map5_reversed	Z. tritici Aus01	Aus01	2979	20336	15	5	14	6	85.61	10.08	65.1	79.5	86.25	96.5	98.2	1452.57	1401.37	40	64	747	2976	3016	48.76	47.04	1.34	2.15	25.08	99.9	101.24
DTX-comp_Aus01-B-R42-Map11_reversed	Z. tritici Aus01	Aus01	2980	17899	20	1	18	1	94.37	6.95	70	94.9	97.05	97.9	99	994.39	897.37	32	306	751	1759	2980	33.37	30.11	1.07	10.27	25.2	59.03	100
DTX-comp_Aus01-B-R48-Map9	Z. tritici Aus01	Aus01	3407	31809	35	3	30	7	86.56	9.09	71.13	77.8	87.1	95.2	98.1	1060.3	1417.05	27	45	123	2336	3413	31.12	41.59	0.79	1.32	3.61	68.56	100.18
DTX-comp_Aus01-B-R63-Map13	Z. tritici Aus01	Aus01	4528	40321	49	3	47	3	85.34	7.96	71.4	78.33	82.9	93.7	98.5	857.89	1394.03	31	117	152	614	4513	18.95	30.79	0.68	2.58	3.36	13.56	99.67
DTX-comp_Aus01-B-R81-Map6_reversed	Z. tritici Aus01	Aus01	3566	23419	13	1	12	2	88.03	11.49	70.1	74.5	93.34	98	98.3	1951.58	1382.72	46	475	2243.5	3268	3573	54.73	38.78	1.29	13.32	62.91	91.64	100.2
DTX-incomp_Aus01-B-G133-Map3	Z. tritici Aus01	Aus01	5443	40613	24	2	20	5	88.08	8.32	72.4	82.3	88	97.2	97.9	2030.65	2435.04	42	63	444	5374	5454	37.31	44.74	0.77	1.16	8.16	98.73	100.2
DTX-incomp_Aus01-B-G249-Map20	Z. tritici Aus01	Aus01	7138	13531	8	1	7	1	91.69	10.78	69.4	89.7	92.2	99.9	100	1933	2651.34	64	96	379	3587	7127	27.08	37.14	0.9	1.34	5.31	50.25	99.85
DTX-incomp_Aus01-B-G607-Map3	Z. tritici Aus01	Aus01	3100	11303	22	3	22	3	83.79	8.87	71.3	77.6	81.8	88.9	100	513.77	1057.66	21	81	94	164	3138	16.57	34.12	0.68	2.61	3.03	5.29	101.23
DTX-incomp_Aus01-B-G77-Map4	Z. tritici Aus01	Aus01	4022	25892	21	4	19	5	84.17	11.17	67.5	75.4	80	95.8	98.1	1362.74	1710.25	60	145	271	3966	4028	33.88	42.52	1.49	3.61	6.74	98.61	100.15
DTX-incomp_Aus01-B-P18.35-Map15_reversed	Z. tritici Aus01	Aus01	5397	108447	27	19	26	19	94.41	7.86	59.4	96.1	97	97.4	97.7	4171.04	2137.64	28	3190	5385	5389	5392	77.28	39.61	0.52	59.11	99.78	99.85	99.91
DTX-incomp_Aus01-B-P25.28-Map10	Z. tritici Aus01	Aus01	7933	91040	18	1900-01-11	18	11	97.46	4.7	86.5	98.6	99.9	100	100	5057.78	3734.49	29	71	7927	7930	7931	63.76	47.08	0.37	0.89	99.92	99.96	99.97
DTX-incomp_Aus01-B-P33.21-Map20	Z. tritici Aus01	Aus01	6970	132834	21	19	21	19	98.06	6.74	70	99.9	100	100	100	6325.43	2001.7	64	6955	6959	6962	6964	90.75	28.72	0.92	99.78	99.84	99.89	99.91
DTX-incomp_Aus01-B-P49.6-Map3	Z. tritici Aus01	Aus01	1624	7433	9	2	9	2	82.5	12.89	68.3	71.3	77.7	94.2	100	825.89	557.55	24	570	770	1140	1624	50.86	34.33	1.48	35.1	47.41	70.2	100
DTX-incomp_Aus01-B-P5.35-Map18	Z. tritici Aus01	Aus01	5387	180228	48	25	43	28	92.93	7.01	72.4	88.4	97	97.5	98	4191.35	1958.89	36	3094	5364	5378	5469	77.8	36.36	0.67	57.43	99.57	99.83	101.52
DTX-incomp_Aus01-B-R129-Map9	Z. tritici Aus01	Aus01	2412	18187	21	5	21	5	89.95	9.65	70.7	82	95.9	97.4	100	866.05	978.52	36	43	537	1886	2410	35.91	40.57	1.49	1.78	22.26	78.19	99.92
DTX-incomp_Aus01-B-R153-Map8	Z. tritici Aus01	Aus01	5420	71248	50	3	37	8	86.88	7.07	72.2	84.07	87.3	89.91	98.6	1925.62	2290.79	29	57	366	4321	5450	35.53	42.27	0.54	1.05	6.75	79.72	100.55
DTX-incomp_Aus01-B-R164-Map3	Z. tritici Aus01	Aus01	3070	19797	20	4	19	4	81.7	11.85	68.2	71.7	74.8	95.8	98.6	1041.95	1239.55	34	208	353	2691	3158	33.94	40.38	1.11	6.78	11.5	87.65	102.87
DTX-incomp_Aus01-B-R176-Map8	Z. tritici Aus01	Aus01	4016	50334	55	1900-01-06	45	10	79.37	8.02	69.82	73.62	77.8	81.4	98.1	1118.53	1642.62	62	120	142	1915	4154	27.85	40.9	1.54	2.99	3.54	47.68	103.44
DTX-incomp_Aus01-B-R201-Map4_reversed	Z. tritici Aus01	Aus01	5208	15377	17	1900-01-02	15	2	79.66	14.02	57.2	68.9	79.2	91.7	99.9	1025.13	1785.82	35	48	105	854	5208	19.68	34.29	0.67	0.92	2.02	16.4	100
DTX-incomp_Aus01-B-R206-Map5	Z. tritici Aus01	Aus01	2874	17186	16	1	15	2	83.79	11.58	67.9	70.8	85.2	98	98.4	1145.73	960.26	60	243	1073	1600	2892	39.87	33.41	2.09	8.46	37.33	55.67	100.63
DTX-incomp_Aus01-B-R248-Map3	Z. tritici Aus01	Aus01	1309	2682	4	1	4	1	86.75	7.36	79.6	82.5	85.6	96.2	96.2	670.5	606.16	154	155	602.5	1323	1323	51.22	46.31	11.76	11.84	46.03	101.07	101.07
DTX-incomp_Aus01-B-R256-Map3	Z. tritici Aus01	Aus01	7292	15155	5	2	4	2	91.08	13.63	71.22	93.1	96.55	100	100	3788.75	4050.62	29	542	3917	7292	7292	51.96	55.55	0.4	7.43	53.72	100	100
DTX-incomp_Aus01-B-R258-Map10	Z. tritici Aus01	Aus01	5506	100923	44	7	35	9	86.57	9.65	65.7	78.6	89.41	94	97.4	2883.51	2098.98	69	768	2690	5374	5497	52.37	38.12	1.25	13.95	48.86	97.6	99.84
DTX-incomp_Aus01-B-R262-Map3_reversed	Z. tritici Aus01	Aus01	2953	14003	15	2	14	3	87.04	11.12	68.5	81.7	83.2	100	100	1000.21	1282.39	59	73	206.5	2750	2953	33.87	43.43	2	2.47	6.99	93.13	100
DTX-incomp_Aus01-B-R301-Map5	Z. tritici Aus01	Aus01	2794	7260	7	1	7	1	76.84	9.4	69.1	71	73.1	80.8	96.4	1037.14	1177.11	40	81	187	2102	2803	37.12	42.13	1.43	2.9	6.69	75.23	100.32
DTX-incomp_Aus01-B-R318-Map3_reversed	Z. tritici Aus01	Aus01	1633	8114	7	3	6	4	85.25	10.09	74.3	75.8	85.04	95.6	95.7	1352.33	620.88	97	1434	1639	1639	1666	82.81	38.02	5.94	87.81	100.37	100.37	102.02
DTX-incomp_Aus01-B-R375-Map3	Z. tritici Aus01	Aus01	1618	7671	8	4	7	4	83.13	15.78	64	65	81.8	99.8	99.9	1095.86	679.51	30	478	1617	1618	1618	67.73	42	1.85	29.54	99.94	100	100
DTX-incomp_Aus01-B-R377-Map3	Z. tritici Aus01	Aus01	2902	13362	19	2	16	4	81.07	11.66	59.2	72.87	82.15	90.25	97.6	835.12	1241.48	39	51	99	2846	2917	28.78	42.78	1.34	1.76	3.41	98.07	100.52
DTX-incomp_Aus01-B-R386-Map3	Z. tritici Aus01	Aus01	1018	5163	6	2	5	3	90.07	11.78	77.13	77.2	98.1	98.7	99.2	1032.6	97.42	927	1007	1018	1018	1193	101.43	9.57	91.06	98.92	100	100	117.19
DTX-incomp_Aus01-B-R388-Map3	Z. tritici Aus01	Aus01	3818	34350	22	3	17	5	76.83	11.66	63.1	69.9	73.26	81.1	98.3	2020.59	1677.07	52	234	2287	3767	3836	52.92	43.93	1.36	6.13	59.9	98.66	100.47
DTX-incomp_Aus01-B-R395-Map3_reversed	Z. tritici Aus01	Aus01	2360	14523	18	3	16	4	74.06	11.98	63.3	65.7	69.35	78.3	98.5	907.69	904.61	32	97	637.5	2250	2360	38.46	38.33	1.36	4.11	27.01	95.34	100
DTX-incomp_Aus01-B-R44-Map5	Z. tritici Aus01	Aus01	7124	56009	16	3	14	4	91.35	10.32	68.7	94.6	95.87	96.3	98.8	4000.64	2807.74	68	701	4417	6950	7136	56.16	39.41	0.95	9.84	62	97.56	100.17
DTX-incomp_Aus01-B-R78-Map3	Z. tritici Aus01	Aus01	1713	6648	9	2	7	3	91.98	6.12	83.53	84.3	95.2	96.7	98.2	949.71	847.2	30	57	1362	1712	1718	55.44	49.46	1.75	3.33	79.51	99.94	100.29
DXX_Aus01-B-P6.42-Map19_reversed	Z. tritici Aus01	Aus01	5402	114688	32	21	30	21	91.72	10.73	61.6	89.5	96.35	99	99.6	3822.93	2437.69	33	329	5389.5	5393	5398	70.77	45.13	0.61	6.09	99.77	99.83	99.93
DXX-MITE_Aus01-B-G320-Map3	Z. tritici Aus01	Aus01	422	4021	22	4	22	4	85.58	7.13	76.6	79.4	83.6	90	99.5	182.77	126.36	54	80	183.5	189	422	43.31	29.94	12.8	18.96	43.48	44.79	100
DXX-MITE_Aus01-B-G326-Map7	Z. tritici Aus01	Aus01	498	4463	12	7	12	7	88.31	9.08	76.1	79.8	89.35	97	97.2	371.92	179.49	105	169	491.5	498	510	74.68	36.04	21.08	33.94	98.69	100	102.41
DXX-MITE_Aus01-B-G353-Map6	Z. tritici Aus01	Aus01	524	3880	8	6	8	6	93.48	9.17	71	95.3	96.35	97.9	98.7	485	68.47	318	503	506.5	521	521	92.56	13.07	60.69	95.99	96.66	99.43	99.43
DXX-MITE_Aus01-B-P16.36-Map4	Z. tritici Aus01	Aus01	346	7083	33	7	33	7	84.86	7.44	76.4	79.5	82.7	87.2	99.7	214.64	89.87	95	131	192	276	369	62.03	25.98	27.46	37.86	55.49	79.77	106.65
DXX-MITE_Aus01-B-P30.24-Map5	Z. tritici Aus01	Aus01	360	2272	8	1900-01-05	8	5	95.19	12.01	65.5	98.9	99.4	100	100	284	108.31	110	217	358.5	360	361	78.89	30.09	30.56	60.28	99.58	100	100.28
DXX-MITE_Aus01-B-R64-Map5	Z. tritici Aus01	Aus01	637	3245	7	4	7	4	94.17	5.92	83	88.9	96.7	98	98.9	463.57	258.55	46	148	625	646	659	72.77	40.59	7.22	23.23	98.12	101.41	103.45
DXX-MITE_Aus01-B-R94-Map7	Z. tritici Aus01	Aus01	498	5237	18	1900-01-08	18	8	91.44	8	75.5	85.8	90.6	100	100	290.94	207.54	38	97	278	497	498	58.42	41.67	7.63	19.48	55.82	99.8	100
noCat_Aus01-B-G340-Map20	Z. tritici Aus01	Aus01	679	4156	48	2	43	2	95.74	2.9	82.4	95.1	96.9	96.9	100	96.65	157.46	21	32	32	76	680	14.23	23.19	3.09	4.71	4.71	11.19	100.15
noCat_Aus01-B-G392-Map16	Z. tritici Aus01	Aus01	790	63860	91	63	91	63	92.36	4.45	75	91.6	92.5	94.8	98.1	701.76	182.28	24	747	758	776	811	88.83	23.07	3.04	94.56	95.95	98.23	102.66
noCat_Aus01-B-P21.32-Map13	Z. tritici Aus01	Aus01	580	8023	16	13	15	14	96.31	1.48	93.3	95.5	96.3	97.2	98.48	534.87	140.81	26	567	571	573	579	92.22	24.28	4.48	97.76	98.45	98.79	99.83
noCat_Aus01-B-P28.25-Map11	Z. tritici Aus01	Aus01	786	34429	51	37	51	37	95.01	2.7	90.2	92.5	96.3	97.4	98.2	690.33	205.77	100	754	776	786	879	87.83	26.18	12.72	95.93	98.73	100	111.83
noCat_Aus01-B-R104-Map18	Z. tritici Aus01	Aus01	869	42002	55	28	54	29	91.96	2.74	86.7	90	91.1	94.5	97.1	777.81	163.11	45	797	827	846	926	89.51	18.77	5.18	91.71	95.17	97.35	106.56
noCat_Aus01-B-R19-Map20	Z. tritici Aus01	Aus01	925	68155	94	4	93	4	91.5	1.95	85.3	90.4	91.4	92.5	98.6	732.85	198.01	26	769	797	825	952	79.23	21.41	2.81	83.14	86.16	89.19	102.92
RIX-comp_Aus01-B-G111-Map7	Z. tritici Aus01	Aus01	10445	275446	87	13	75	14	89.99	7.91	67.2	90.7	93.6	94.4	96.7	3672.61	4000.01	54	481	1386	6945	10761	35.16	38.3	0.52	4.61	13.27	66.49	103.03
RIX-comp_Aus01-B-G200-Map5_reversed	Z. tritici Aus01	Aus01	8579	243204	113	1	107	1	96.2	1.58	90.2	95.5	96.3	97.1	100	2301.47	1807.24	38	538	2218	3363	8579	26.83	21.07	0.44	6.27	25.85	39.2	100
RIX-comp_Aus01-B-G64-Map20	Z. tritici Aus01	Aus01	5665	644101	156	90	141	100	95.55	3.25	79	94	95.2	98.6	100	4573.1	1843.21	38	4212	5579	5587	5614	80.73	32.54	0.67	74.35	98.48	98.62	99.1
RIX-incomp_Aus01-B-G538-Map3	Z. tritici Aus01	Aus01	2339	16116	12	5	9	5	76.71	18.48	57.1	60.04	70	96.5	98.1	1790.67	654.7	1072	1107	2335	2336	2367	76.56	27.99	45.83	47.33	99.83	99.87	101.2
RIX-incomp_Aus01-B-R279-Map7	Z. tritici Aus01	Aus01	4558	35869	22	2	19	3	79.39	12.42	64	67.8	75.1	94.1	97.1	1887.84	1609.35	37	331	1852	3107	4568	41.42	35.31	0.81	7.26	40.63	68.17	100.22
RIX-incomp_Aus01-B-R312-Map3_reversed	Z. tritici Aus01	Aus01	4034	8305	4	2	4	2	87.53	13.55	75.5	76.1	87.3	100	100	2076.25	2262.45	91	143	2089	4036	4036	51.47	56.08	2.26	3.54	51.78	100.05	100.05
RLX-comp_Aus01-B-G153-Map20_reversed	Z. tritici Aus01	Aus01	6473	46102	51	3	48	3	88.82	10.72	57.4	85.7	94.36	95.7	100	960.46	1694.72	34	67	218.5	1031	6441	14.84	26.18	0.53	1.04	3.38	15.93	99.51
RLX-comp_Aus01-B-G192-Map20	Z. tritici Aus01	Aus01	6172	722372	314	2	256	33	94.71	4.01	64.7	93.7	96.2	96.9	98.2	2822.51	2491.02	26	449	1560.5	5722	6272	45.73	40.36	0.42	7.27	25.28	92.71	101.62
RLX-comp_Aus01-B-G208-Map19_reversed	Z. tritici Aus01	Aus01	7078	133284	50	6	43	8	90.48	9.27	73	80	96.26	96.6	97.2	3104.16	2776.89	70	267	2203	6320	7124	43.86	39.23	0.99	3.77	31.12	89.29	100.65
RLX-comp_Aus01-B-R60-Map20	Z. tritici Aus01	Aus01	6362	188306	86	11	80	12	93.08	8.54	56.3	94.4	95.3	96.3	98.6	2354.11	2257.67	32	295	1548.5	4089	6369	37	35.49	0.5	4.64	24.34	64.27	100.11
RLX-incomp_Aus01-B-G1-Map20	Z. tritici Aus01	Aus01	6402	579372	118	81	106	88	92.73	7.15	71.6	86.4	96.1	97.9	98.9	5465.95	2102.51	122	6344	6358	6371	6436	85.38	32.84	1.91	99.09	99.31	99.52	100.53
RLX-incomp_Aus01-B-G106-Map14	Z. tritici Aus01	Aus01	4359	13391	13	1	12	1	84.58	11.5	71.2	74.8	85.2	96.7	97.2	1116.08	1610.01	74	111	116	2658	4359	25.6	36.94	1.7	2.55	2.66	60.98	100
RLX-incomp_Aus01-B-G127-Map20	Z. tritici Aus01	Aus01	4629	27964	20	1	20	1	92.55	8.93	55	93.4	94.2	94.9	98.5	1398.2	1014.42	76	1280	1284.5	1287	4424	30.21	21.91	1.64	27.65	27.75	27.8	95.57
RLX-incomp_Aus01-B-G130-Map8_reversed	Z. tritici Aus01	Aus01	5802	21930	25	1	22	2	80.96	16.4	57.4	67	93.05	95.5	98.3	996.82	1676.2	36	117	311	771	5779	17.18	28.89	0.62	2.02	5.36	13.29	99.6
RLX-incomp_Aus01-B-G147-Map5	Z. tritici Aus01	Aus01	7619	228582	126	2	104	6	93.75	7.39	56.3	95.23	95.8	96.2	98.6	2197.94	2146.13	26	757	762.5	3786	7635	28.85	28.17	0.34	9.94	10.01	49.69	100.21
RLX-incomp_Aus01-B-G156-Map20	Z. tritici Aus01	Aus01	6831	253183	104	1900-01-12	85	17	93.9	5.36	66.2	94.5	95.46	96	97.7	3002.19	2514.75	33	578	2210	5369	6818	43.95	36.81	0.48	8.46	32.35	78.6	99.81
RLX-incomp_Aus01-B-G185-Map20_reversed	Z. tritici Aus01	Aus01	5723	44973	74	1	74	1	93.9	4.83	55.6	93	93.9	95.1	99.1	631.3	641.98	82	583	584	585	5702	11.03	11.22	1.43	10.19	10.2	10.22	99.63
RLX-incomp_Aus01-B-G204-Map4	Z. tritici Aus01	Aus01	11486	316196	134	1	99	4	89.9	11.49	53.5	91.96	94.1	95.32	97.5	3202.04	3231.7	37	588	1780	5540	11504	27.88	28.14	0.32	5.12	15.5	48.23	100.16
RLX-incomp_Aus01-B-G218-Map20	Z. tritici Aus01	Aus01	8477	193609	37	1900-01-19	34	19	90.25	12.01	55.6	90.38	95.95	96.9	100	5694.88	3658.71	25	434	8460	8463	8474	67.18	43.16	0.29	5.12	99.8	99.83	99.96
RLX-incomp_Aus01-B-G228-Map5_reversed	Z. tritici Aus01	Aus01	8370	60947	23	3	19	3	87.72	13.6	57.7	82.3	95.66	96.2	97.8	3208.95	3046.27	33	171	2384	5885	8365	38.34	36.4	0.39	2.04	28.48	70.31	99.94
RLX-incomp_Aus01-B-G286-Map4	Z. tritici Aus01	Aus01	13858	62473	13	4	13	4	86.8	12.66	54.8	86	89.5	96.1	96.8	4805.62	6332.65	26	154	1092	13806	13817	34.68	45.7	0.19	1.11	7.88	99.62	99.7
RLX-incomp_Aus01-B-G342-Map4_reversed	Z. tritici Aus01	Aus01	702	2190	5	3	4	3	90.08	8.77	76.93	94	94.35	94.7	94.7	547.5	309	84	702	702	702	702	77.99	44.02	11.97	100	100	100	100
RLX-incomp_Aus01-B-G406-Map3_reversed	Z. tritici Aus01	Aus01	1010	4974	9	3	9	3	87.01	8.07	78.7	81.8	83.7	95.7	98.5	552.67	435.67	49	50	747	1003	1010	54.72	43.14	4.85	4.95	73.96	99.31	100
RLX-incomp_Aus01-B-G52-Map20	Z. tritici Aus01	Aus01	7313	47513	59	1	51	1	90.48	11.38	58	91.6	95.4	96.2	97.5	932.16	1188.23	27	464	757	763	7092	12.75	16.25	0.37	6.34	10.35	10.43	96.98
RLX-incomp_Aus01-B-G90-Map19	Z. tritici Aus01	Aus01	4072	12467	19	1	19	1	73.81	13.96	55.7	63.7	68.4	86.5	96.8	656.16	897.26	34	265	364	1110	3990	16.11	22.03	0.83	6.51	8.94	27.26	97.99
RLX-incomp_Aus01-B-R11-Map20_reversed	Z. tritici Aus01	Aus01	8280	122316	35	4	28	6	95.02	2.83	85	95	96.15	96.8	97.4	4369.07	2954.57	50	1856	4769.5	7216	8332	52.77	35.68	0.6	22.42	57.6	87.15	100.63
RLX-incomp_Aus01-B-R150-Map7	Z. tritici Aus01	Aus01	5528	23461	23	1	20	1	86.49	11.87	55.3	84	90.55	94.9	98.1	1175.05	1721.24	62	169	265.5	1696	5555	21.26	31.14	1.12	3.06	4.8	30.68	100.49
RLX-incomp_Aus01-B-R17-Map20	Z. tritici Aus01	Aus01	13929	435127	135	3	90	7	88.2	10.76	54.6	87.07	93.33	94.8	97	4834.76	4657.93	26	909	2826.5	8972	13835	34.71	33.44	0.19	6.53	20.29	64.41	99.33
RLX-incomp_Aus01-B-R199-Map3	Z. tritici Aus01	Aus01	2983	16514	13	3	12	2	70.76	14.32	55.9	61.6	67.9	86.67	96.3	1376.17	1329	117	235	539	2984	3241	46.13	44.55	3.92	7.88	18.07	100.03	108.65
RLX-incomp_Aus01-B-R208-Map8	Z. tritici Aus01	Aus01	6513	95545	48	5	34	5	91.55	9.45	62.2	94.2	95.2	95.6	98.3	2810.15	2478.3	22	291	2752	5146	6513	43.15	38.05	0.34	4.47	42.25	79.01	100
RLX-incomp_Aus01-B-R24-Map20	Z. tritici Aus01	Aus01	8384	294576	57	21	51	26	95.83	4.11	68.2	96.2	96.7	96.9	98.8	5776	3159.12	82	3164	8074	8275	8280	68.89	37.68	0.98	37.74	96.3	98.7	98.76
RLX-incomp_Aus01-B-R244-Map3_reversed	Z. tritici Aus01	Aus01	1728	14762	20	2	19	3	81.37	11.59	59.9	70.5	80.9	93.6	98.4	776.95	744.48	81	110	572	1727	2016	44.96	43.08	4.69	6.37	33.1	99.94	116.67
RLX-incomp_Aus01-B-R245-Map3_reversed	Z. tritici Aus01	Aus01	2654	21381	14	3	13	4	79.07	13.33	60.7	68.7	76.03	94.3	98.1	1644.69	1076.63	35	272	2170	2616	2654	61.97	40.57	1.32	10.25	81.76	98.57	100
RLX-incomp_Aus01-B-R254-Map8_reversed	Z. tritici Aus01	Aus01	4038	23911	22	1	20	1	85.68	10.09	71.7	77.27	80.5	97.7	99	1195.55	1438.84	35	182	293.5	2769	4031	29.61	35.63	0.87	4.51	7.27	68.57	99.83
RLX-incomp_Aus01-B-R314-Map3	Z. tritici Aus01	Aus01	6357	449033	118	55	96	64	88.65	7.55	56.3	89.1	90.07	92	97.5	4678.2	2328.25	22	2885	6222	6232	6377	73.59	36.63	0.35	45.38	97.88	98.03	100.31
RLX-incomp_Aus01-B-R392-Map5	Z. tritici Aus01	Aus01	5909	75311	47	3	33	3	72.91	12.51	55.2	66.8	71.2	75.9	100	2282.15	2172.76	24	253	1241	4746	5909	38.62	36.77	0.41	4.28	21	80.32	100
RLX-incomp_Aus01-B-R76-Map3	Z. tritici Aus01	Aus01	587	587	1	1	1	1	100	0	100	100	100	100	100	587	0	587	587	587	587	587	100	0	100	100	100	100	100
RLX-incomp_Aus01-B-R77-Map3	Z. tritici Aus01	Aus01	1619	7630	14	1900-01-01	14	1	83.09	8.32	75.1	79	79.35	84.8	100	545	476.93	110	151	465	558	1619	33.66	29.46	6.79	9.33	28.72	34.47	100
RLX-incomp_Aus01-B-R9-Map20	Z. tritici Aus01	Aus01	9506	144078	71	4	60	6	90.27	5.76	78.6	85.64	92.05	95.9	97.3	2401.3	3335.72	29	166	576	3222	9539	25.26	35.09	0.31	1.75	6.06	33.89	100.35
RLX-incomp_Aus01-B-R95-Map20	Z. tritici Aus01	Aus01	8379	90387	44	1	35	4	82.62	13.11	53.7	74.8	84.45	96.82	98.3	2584.29	3075.72	31	92	854	5699	8429	30.84	36.71	0.37	1.1	10.19	68.02	100.6
RXX_Aus01-B-R384-Map4_reversed	Z. tritici Aus01	Aus01	1870	10333	28	2	21	2	87.65	11.23	62.9	78.67	90.8	96.7	99.9	495	518.32	36	168	275	597	1867	26.47	27.72	1.93	8.98	14.71	31.93	99.84
DHX-incomp_CH95-B-G138-Map13	Z. tritici CH95	CH95	7217	43611	12	3	11	3	94.32	2.68	87.3	93.51	95.2	96.2	96.6	3964.64	2933.96	62	687	5023	7216	7217	54.93	40.65	0.86	9.52	69.6	99.99	100
DHX-incomp_CH95-B-G168-Map4_reversed	Z. tritici CH95	CH95	7177	28882	5	4	5	4	96.42	0.48	96	96.1	96.3	96.5	97.2	5776.4	3091.62	252	6936	7176	7176	7342	80.48	43.08	3.51	96.64	99.99	99.99	102.3
DHX-incomp_CH95-B-G213-Map12_reversed	Z. tritici CH95	CH95	9643	21239	17	1	17	1	75.23	10.96	66	69.2	69.6	75.9	100	1249.35	3020.18	69	94	99	428	9392	12.96	31.32	0.72	0.97	1.03	4.44	97.4
DHX-incomp_CH95-B-G431-Map3	Z. tritici CH95	CH95	1675	9708	21	4	20	5	82.4	8.99	59.5	80	80.95	91	98.3	485.4	701.37	36	71	90.5	1622	1680	28.98	41.87	2.15	4.24	5.4	96.84	100.3
DHX-incomp_CH95-B-P16.17-Map5_reversed	Z. tritici CH95	CH95	13723	202827	58	8	55	8	86.96	11.1	67.3	76.5	94.7	95.8	100	3687.76	5176.49	30	83	138	8188	13780	26.87	37.72	0.22	0.6	1.01	59.67	100.42
DHX-incomp_CH95-B-R242-Map3_reversed	Z. tritici CH95	CH95	7236	25648	23	2	22	2	82.92	10.5	63.9	76.8	81.65	89.5	100	1165.82	2358.87	25	162	204	313	7237	16.11	32.6	0.35	2.24	2.82	4.33	100.01
DHX-incomp_CH95-B-R31-Map20_reversed	Z. tritici CH95	CH95	14613	251137	76	7	65	10	84.29	12.87	57.6	74.8	85.5	97	100	3863.65	5485.79	31	133	252	5741	14613	26.44	37.54	0.21	0.91	1.72	39.29	100
DTX-comp_CH95-B-G70-Map3_reversed	Z. tritici CH95	CH95	3539	15972	18	2	14	2	88.88	11.82	57.6	87.6	92.1	97.2	98.5	1140.86	1402.48	24	180	397	2643	3572	32.24	39.63	0.68	5.09	11.22	74.68	100.93
DTX-comp_CH95-B-P7.26-Map4_reversed	Z. tritici CH95	CH95	1342	10009	10	6	9	6	91.31	9.73	73.1	85.3	98.1	99.2	99.5	1112.11	445.03	83	1254	1338	1339	1342	82.87	33.16	6.18	93.44	99.7	99.78	100
DTX-comp_CH95-B-R160-Map3	Z. tritici CH95	CH95	2193	10917	17	3	13	4	74.63	10.33	68	69.8	70.13	72.9	98.1	839.77	965.45	26	68	511	2193	2215	38.29	44.02	1.19	3.1	23.3	100	101
DTX-comp_CH95-B-R313-Map8_reversed	Z. tritici CH95	CH95	2191	22308	16	4	15	5	87.48	11.26	70.8	77.9	95.3	97.8	98.7	1487.2	656.17	492	910	1598	2153	2208	67.88	29.95	22.46	41.53	72.93	98.27	100.78
DTX-comp_CH95-B-R318-Map5	Z. tritici CH95	CH95	2972	20915	22	2	19	3	85.24	8.89	72.5	75.8	85.34	94.6	97.3	1101.21	1104.06	40	97	494	1997	2998	37.05	37.15	1.35	3.26	16.62	67.19	100.87
DTX-comp_CH95-B-R5-Map5	Z. tritici CH95	CH95	3400	22897	26	1900-01-01	25	1	81.96	12.1	64.66	71.8	77.1	96.7	100	915.88	1111.82	29	150	240	1246	3400	26.94	32.7	0.85	4.41	7.06	36.65	100
DTX-comp_CH95-B-R59-Map8	Z. tritici CH95	CH95	2220	26604	21	8	17	10	86.94	10.1	70.6	78.1	89.5	96.2	98.3	1564.94	926.29	36	501	2153	2207	2221	70.49	41.72	1.62	22.57	96.98	99.41	100.05
DTX-comp_CH95-B-R68-Map8_reversed	Z. tritici CH95	CH95	3572	21249	17	3	14	3	90.11	11.12	69.8	91.2	94.88	97.3	98.2	1522.5	1391.14	34	484	727	3087	3647	42.62	38.95	0.95	13.55	20.35	86.42	102.1
DTX-comp_CH95-B-R69-Map3	Z. tritici CH95	CH95	3565	13585	11	3	10	3	81.94	15.19	58.4	71.8	86.44	96.9	98.3	1358.5	1580.64	39	67	428	3387	3566	38.11	44.34	1.09	1.88	12.01	95.01	100.03
DTX-comp_CH95-B-R70-Map3	Z. tritici CH95	CH95	1323	6153	10	2	10	2	83.6	15.67	58.6	68.3	93.4	97.2	97.6	615.3	535.07	30	31	634.5	1125	1324	46.51	40.44	2.27	2.34	47.96	85.03	100.08
DTX-incomp_CH95-B-G108-Map19	Z. tritici CH95	CH95	5374	37625	11	6	10	6	88.98	6.35	79.9	84.6	88.55	96.4	97.5	3762.5	2317.01	52	1436	5322.5	5382	5436	70.01	43.12	0.97	26.72	99.04	100.15	101.15
DTX-incomp_CH95-B-G135-Map10	Z. tritici CH95	CH95	5509	56501	29	5	24	8	89.1	7.88	70.9	89.1	90.75	93.6	98.2	2354.21	2422.67	37	127	1244.5	5374	5758	42.73	43.98	0.67	2.31	22.59	97.55	104.52
DTX-incomp_CH95-B-G140-Map4	Z. tritici CH95	CH95	5468	33169	14	4	13	5	89.35	7.12	76.1	84.6	89.6	96.3	97.5	2551.46	2643.3	34	67	1050	5438	5455	46.66	48.34	0.62	1.23	19.2	99.45	99.76
DTX-incomp_CH95-B-G45-Map6	Z. tritici CH95	CH95	4276	10121	18	2	18	2	81.98	9.07	66.1	77.7	81.25	87.8	97.3	562.28	1349.91	31	43	114	137	4273	13.15	31.57	0.72	1.01	2.67	3.2	99.93
DTX-incomp_CH95-B-G452-Map3_reversed	Z. tritici CH95	CH95	2074	10792	20	2	18	3	81.51	15.23	59.7	67.1	90.3	93.66	98.9	599.56	870.1	24	36	76.5	749	2332	28.91	41.95	1.16	1.74	3.69	36.11	112.44
DTX-incomp_CH95-B-G84-Map5	Z. tritici CH95	CH95	3622	17056	20	2	20	2	81.82	10.65	68.5	72	77.85	91.5	99.6	852.8	1188.73	36	108	451.5	968	3615	23.55	32.82	0.99	2.98	12.47	26.73	99.81
DTX-incomp_CH95-B-G90-Map6	Z. tritici CH95	CH95	4023	31626	35	4	30	6	79.85	8.81	67.4	74.8	77.85	81.7	97.7	1054.2	1588.02	39	128	175.5	1521	4116	26.2	39.47	0.97	3.18	4.36	37.81	102.31
DTX-incomp_CH95-B-G94-Map3_reversed	Z. tritici CH95	CH95	4009	24583	20	3	16	5	88.82	8.65	75.6	79.2	91.75	95.2	100	1536.44	1903.56	38	52	189	4007	4066	38.32	47.48	0.95	1.3	4.71	99.95	101.42
DTX-incomp_CH95-B-P14.19-Map3	Z. tritici CH95	CH95	1622	11745	11	5	9	6	80.36	13.04	66.7	70.16	74.96	95.6	98.2	1305	551.79	156	1301	1616	1620	1622	80.46	34.02	9.62	80.21	99.63	99.88	100
DTX-incomp_CH95-B-P15.18-Map10_reversed	Z. tritici CH95	CH95	7938	79353	11	10	11	10	99.36	1.95	93.5	99.8	100	100	100	7213.91	2377.33	46	7927	7930	7931	7938	90.88	29.95	0.58	99.86	99.9	99.91	100
DTX-incomp_CH95-B-P28.5-Map4_reversed	Z. tritici CH95	CH95	2198	17783	15	1900-01-06	13	8	85.27	8.95	74.16	76.2	84	95.9	97.6	1367.92	1079	37	49	2184	2195	2208	62.23	49.09	1.68	2.23	99.36	99.86	100.45
DTX-incomp_CH95-B-P33.0-Map5	Z. tritici CH95	CH95	6960	50232	22	6	16	7	90.37	9.97	69.8	90.69	92.2	99.4	99.8	3139.5	3479.58	62	96	432	6956	6973	45.11	49.99	0.89	1.38	6.21	99.94	100.19
DTX-incomp_CH95-B-P38.37-Map3	Z. tritici CH95	CH95	3621	23929	27	3	25	5	82.82	9.01	60.7	76.9	82.8	88.6	99	957.16	1394.72	29	71	136	1085	3785	26.43	38.52	0.8	1.96	3.76	29.96	104.53
DTX-incomp_CH95-B-P39.38-Map4	Z. tritici CH95	CH95	5390	16243	5	3	5	3	87.38	16.28	59.7	85.7	96.2	96.6	98.7	3248.6	2934.52	26	42	5388	5390	5397	60.27	54.44	0.48	0.78	99.96	100	100.13
DTX-incomp_CH95-B-R106-Map5	Z. tritici CH95	CH95	2920	18000	16	2	13	3	86.13	11.16	67.9	78.84	83.3	97.6	98.4	1384.62	1154.65	59	235	1133	2708	2920	47.42	39.54	2.02	8.05	38.8	92.74	100
DTX-incomp_CH95-B-R128-Map5	Z. tritici CH95	CH95	2955	21577	15	4	13	4	85.26	13.29	66.84	67.61	93	96.5	98.5	1659.77	1071.45	59	1162	1545	2853	2939	56.17	36.26	2	39.32	52.28	96.55	99.46
DTX-incomp_CH95-B-R140-Map4	Z. tritici CH95	CH95	4096	15027	28	2	27	2	84.13	9.18	65.4	77	80.6	93.8	97.8	556.56	1138.99	31	63	143	231	4096	13.59	27.81	0.76	1.54	3.49	5.64	100
DTX-incomp_CH95-B-R147-Map13	Z. tritici CH95	CH95	7315	37372	36	2	33	3	87.13	9.57	64.7	78.8	84.4	96.8	98.1	1132.55	2207.23	27	64	140	450	7299	15.48	30.17	0.37	0.87	1.91	6.15	99.78
DTX-incomp_CH95-B-R152-Map4	Z. tritici CH95	CH95	970	1249	5	1	5	1	90.06	9.83	74.4	87	94.7	94.7	99.5	249.8	406.06	21	45	47	167	969	25.75	41.86	2.16	4.64	4.85	17.22	99.9
DTX-incomp_CH95-B-R177-Map3	Z. tritici CH95	CH95	1172	2297	2	2	2	2	88.45	12.52	79.6	79.6	88.45	97.3	97.3	1148.5	33.23	1125	1125	1148.5	1172	1172	97.99	2.84	95.99	95.99	97.99	100	100
DTX-incomp_CH95-B-R18-Map5	Z. tritici CH95	CH95	3702	18367	26	2	26	2	83.49	12.06	58.6	75.8	83.35	96.4	98.8	706.42	1147.38	28	54	81.5	1526	3701	19.08	30.99	0.76	1.46	2.2	41.22	99.97
DTX-incomp_CH95-B-R185-Map3	Z. tritici CH95	CH95	607	5888	12	7	12	7	81.58	10.37	68.7	74.8	81.25	93.5	100	490.67	214.08	31	535	599.5	606	607	80.83	35.27	5.11	88.14	98.76	99.84	100
DTX-incomp_CH95-B-R197-Map4	Z. tritici CH95	CH95	3746	18659	13	2	11	3	84.89	10.82	66.2	76.9	87.53	94.7	98.5	1696.45	1629.76	35	130	1711	3656	3835	45.29	43.51	0.93	3.47	45.68	97.6	102.38
DTX-incomp_CH95-B-R2-Map9	Z. tritici CH95	CH95	3568	24424	25	2	25	2	80.7	15.53	56.2	69.5	71.7	97.1	98.4	976.96	950.39	28	246	602	1438	3558	27.38	26.64	0.78	6.89	16.87	40.3	99.72
DTX-incomp_CH95-B-R215-Map7	Z. tritici CH95	CH95	4007	18083	19	2	19	2	83.44	11.3	70.6	74.3	76.7	97.7	98.3	951.74	1307.41	44	136	173	1484	4017	23.75	32.63	1.1	3.39	4.32	37.04	100.25
DTX-incomp_CH95-B-R229-Map3	Z. tritici CH95	CH95	5371	21089	10	3	10	3	88.37	10.18	65.8	86.1	89.95	94.2	100	2108.9	2646.16	26	35	117.5	5352	5373	39.26	49.27	0.48	0.65	2.19	99.65	100.04
DTX-incomp_CH95-B-R233-Map3	Z. tritici CH95	CH95	5324	18346	5	3	5	3	90.92	10.09	73.3	92	94.7	97.2	97.4	3669.2	2411.11	195	2064	5324	5333	5430	68.92	45.29	3.66	38.77	100	100.17	101.99
DTX-incomp_CH95-B-R29-Map9	Z. tritici CH95	CH95	5467	44413	16	4	15	5	87.95	10.45	70.7	73.3	91.2	96.4	97.8	2960.87	2097.77	28	941	2886	5377	5459	54.16	38.37	0.51	17.21	52.79	98.35	99.85
DTX-incomp_CH95-B-R292-Map4_reversed	Z. tritici CH95	CH95	2509	22627	23	1900-01-02	20	3	79.34	12.03	63.83	68.3	78.25	93.62	99	1131.35	840.66	56	284	1254	1607	2514	45.09	33.51	2.23	11.32	49.98	64.05	100.2
DTX-incomp_CH95-B-R32-Map11	Z. tritici CH95	CH95	5451	48457	21	1900-01-04	19	4	85.92	12.07	61.5	73.3	90.9	97.54	98.1	2550.37	2160.52	39	48	2549	4659	5451	46.79	39.64	0.72	0.88	46.76	85.47	100
DTX-incomp_CH95-B-R328-Map3_reversed	Z. tritici CH95	CH95	1600	3425	4	1900-01-02	4	2	94.58	4.89	87.3	96.2	96.6	97.8	97.8	856.25	858.73	77	149	874	1600	1600	53.52	53.67	4.81	9.31	54.62	100	100
DTX-incomp_CH95-B-R371-Map3	Z. tritici CH95	CH95	1887	11416	11	1900-01-03	10	3	78.15	14.78	56.9	69.6	71.22	97.4	99.2	1141.6	747.85	69	454	1311.5	1885	1893	60.5	39.63	3.66	24.06	69.5	99.89	100.32
DTX-incomp_CH95-B-R395-Map3	Z. tritici CH95	CH95	1451	5937	7	1900-01-04	6	4	81.75	19.14	58.8	58.8	88.45	97.9	98.1	989.5	720.79	55	63	1450.5	1451	1467	68.19	49.68	3.79	4.34	99.97	100	101.1
DTX-incomp_CH95-B-R42-Map20	Z. tritici CH95	CH95	7134	50841	19	1900-01-05	18	6	93.07	8.2	71.8	91.9	94.1	98.8	100	2824.5	3238.49	31	64	487.5	6786	7128	39.59	45.4	0.43	0.9	6.83	95.12	99.92
DTX-incomp_CH95-B-R43-Map20	Z. tritici CH95	CH95	5452	90276	43	15	41	16	90.56	11.36	58.92	90	96.4	96.9	100	2201.85	2617.02	25	31	139	5417	5461	40.39	48	0.46	0.57	2.55	99.36	100.17
DTX-incomp_CH95-B-R8-Map4_reversed	Z. tritici CH95	CH95	4006	22896	28	3	27	3	85.06	8.84	73.5	77.8	84.5	92.5	100	848	1357.59	35	92	130	1069	4061	21.17	33.89	0.87	2.3	3.25	26.68	101.37
DTX-incomp_CH95-B-R80-Map4	Z. tritici CH95	CH95	991	5903	22	1	22	1	80.88	8.57	68.5	74.1	77.95	84.4	98.2	268.32	307.1	21	97	128	224	991	27.08	30.99	2.12	9.79	12.92	22.6	100
DTX-incomp_CH95-B-R82-Map6	Z. tritici CH95	CH95	3322	19302	12	1900-01-04	11	4	90.18	7.99	72.5	85.6	92.9	97.2	98.3	1754.73	1548.1	44	220	1713	3333	3414	52.82	46.6	1.32	6.62	51.57	100.33	102.77
DXX-MITE_CH95-B-G239-Map4	Z. tritici CH95	CH95	359	1473	5	4	5	4	97.06	4.45	89.1	98.9	98.9	99.2	99.2	294.6	140.1	44	354	357	359	359	82.06	39.03	12.26	98.61	99.44	100	100
DXX-MITE_CH95-B-G255-Map3	Z. tritici CH95	CH95	414	4015	13	8	12	9	83.63	10.41	72.1	76.7	79.22	97.3	99	334.58	147.06	49	401	413.5	419	427	80.82	35.52	11.84	96.86	99.88	101.21	103.14
DXX-MITE_CH95-B-G271-Map4	Z. tritici CH95	CH95	406	3511	21	5	21	5	87.55	9.54	75.9	77.9	86.7	95	100	167.19	137.48	54	86	100	124	406	41.18	33.86	13.3	21.18	24.63	30.54	100
DXX-MITE_CH95-B-G282-Map3	Z. tritici CH95	CH95	497	1980	4	4	4	4	95.2	5.57	87	97	97.2	99.4	99.4	495	2.16	492	495	495.5	497	497	99.6	0.43	98.99	99.6	99.7	100	100
DXX-MITE_CH95-B-P22.11-Map4	Z. tritici CH95	CH95	642	3706	12	5	12	5	87.03	8.43	77.1	80.3	85.2	97.5	97.8	308.83	295.68	69	70	70	650	661	48.1	46.06	10.75	10.9	10.9	101.25	102.96
DXX-MITE_CH95-B-P26.7-Map8	Z. tritici CH95	CH95	493	5914	19	9	19	9	88.02	8.11	75.3	81.7	89.8	96.7	98.2	311.26	195.73	40	108	417	489	511	63.14	39.7	8.11	21.91	84.58	99.19	103.65
DXX-MITE_CH95-B-P37.36-Map3	Z. tritici CH95	CH95	706	2044	5	2	4	2	86.78	13.47	73.8	76.63	86.66	100	100	511	224.67	309	324	514.5	706	706	72.38	31.82	43.77	45.89	72.88	100	100
DXX-MITE_CH95-B-P9.24-Map6	Z. tritici CH95	CH95	521	3551	7	1900-01-06	7	6	93.67	10.19	70.9	94.4	96.8	99	99.2	507.29	10.24	493	500	503	517	519	97.37	1.97	94.63	95.97	96.55	99.23	99.62
noCat_CH95-B-G43-Map20	Z. tritici CH95	CH95	4122	17204	18	2	17	3	88.21	8.3	75.5	79	91.7	95.2	100	1012	1581.53	35	42	139	1214	4041	24.55	38.37	0.85	1.02	3.37	29.45	98.03
noCat_CH95-B-R115-Map16	Z. tritici CH95	CH95	885	47634	59	19	59	19	90.96	2.54	85.7	89	90.6	93.2	95.6	807.36	147.85	89	812	828	863	989	91.23	16.71	10.06	91.75	93.56	97.51	111.75
noCat_CH95-B-R124-Map11	Z. tritici CH95	CH95	764	32190	47	29	44	31	93.24	3.8	84.8	91.6	92.75	94.8	99.7	731.59	186.45	38	754	763	784	892	95.76	24.4	4.97	98.69	99.87	102.62	116.75
noCat_CH95-B-R178-Map19	Z. tritici CH95	CH95	796	21508	31	20	31	20	93.86	6.5	76.6	88	96.6	99.5	99.6	693.81	234.2	26	766	774	777	881	87.16	29.42	3.27	96.23	97.24	97.61	110.68
noCat_CH95-B-R26-Map20	Z. tritici CH95	CH95	865	70620	91	32	89	32	91.98	2.28	86.32	90.4	92.1	93.7	96.5	793.48	114.98	70	775	807	845	917	91.73	13.29	8.09	89.6	93.29	97.69	106.01
noCat_CH95-B-R30-Map14	Z. tritici CH95	CH95	824	13599	20	1900-01-07	20	7	94.64	2.43	90.5	92.9	94.7	97.4	98.8	679.95	238.31	56	748	759.5	800	844	82.52	28.92	6.8	90.78	92.17	97.09	102.43
noCat_CH95-B-R62-Map20	Z. tritici CH95	CH95	818	28484	38	18	37	18	94.81	3.06	88.2	92.8	94	98.3	99.2	769.84	111.41	188	759	789	810	879	94.11	13.62	22.98	92.79	96.45	99.02	107.46
RIX-comp_CH95-B-G18-Map6_reversed	Z. tritici CH95	CH95	8536	421203	133	2	122	4	92.42	6.34	66.2	92.4	94.2	95.7	98.2	3463.97	2382.91	21	972	3620	5578	8316	40.58	27.92	0.25	11.39	42.41	65.35	97.42
RIX-comp_CH95-B-G25-Map3	Z. tritici CH95	CH95	7359	435745	151	1	145	1	97.38	3.31	77.6	96.8	98.4	99.5	100	3087.81	2350.83	29	610	2486	5596	7348	41.96	31.94	0.39	8.29	33.78	76.04	99.85
RIX-comp_CH95-B-R86-Map20_reversed	Z. tritici CH95	CH95	9089	173941	84	4	69	5	87.34	8.47	64	80.93	92.3	94.3	97.1	2520.88	3037.79	65	484	868	3743	9413	27.74	33.42	0.72	5.33	9.55	41.18	103.56
RLX-comp_CH95-B-G150-Map20	Z. tritici CH95	CH95	6424	211414	113	11	94	18	92.1	8.3	57.7	92.94	94.95	96.1	98.2	2253.72	2439.38	27	270	1058	3907	6567	35.08	37.97	0.42	4.2	16.47	60.82	102.23
RLX-comp_CH95-B-G162-Map4	Z. tritici CH95	CH95	6719	47040	29	2	24	2	80.62	16.83	56.4	62.6	88.25	96.2	96.9	1960	2582.85	57	265	631.5	5798	6718	29.17	38.44	0.85	3.94	9.4	86.29	99.99
RLX-comp_CH95-B-G186-Map9_reversed	Z. tritici CH95	CH95	6962	101570	35	5	27	11	87.05	11.59	55.9	77.2	92.89	96.3	97	3761.85	3130.1	26	200	3497	6959	6972	54.03	44.96	0.37	2.87	50.23	99.96	100.14
RLX-comp_CH95-B-R10-Map20	Z. tritici CH95	CH95	6930	676279	204	1900-02-18	150	65	92.45	4.5	75.4	89.22	92.8	96.5	99.1	4511.92	2620.27	38	2156	5431.5	6928	7045	65.11	37.81	0.55	31.11	78.38	99.97	101.66
RLX-comp_CH95-B-R199-Map4_reversed	Z. tritici CH95	CH95	7132	33116	31	1900-01-02	27	2	81.52	10.94	60.6	69.54	81.8	92.5	97.2	1226.52	1975.34	40	78	110	2324	7135	17.2	27.7	0.56	1.09	1.54	32.59	100.04
RLX-comp_CH95-B-R264-Map5_reversed	Z. tritici CH95	CH95	7040	23964	11	1900-01-01	10	1	75.34	18.53	55.5	58.8	67.01	96.8	98.2	2407.9	4157.31	115	260	415.5	2064	12595	34.2	59.05	1.63	3.69	5.9	29.32	178.91
RLX-comp_CH95-B-R39-Map20_reversed	Z. tritici CH95	CH95	6806	468750	126	42	95	53	92.1	4.03	75	89.6	92	95.8	97.3	4936.95	2503.32	82	2366	6791	6801	6829	72.54	36.78	1.2	34.76	99.78	99.93	100.34
RLX-comp_CH95-B-R6-Map20_reversed	Z. tritici CH95	CH95	6820	207727	75	13	64	17	89.61	11.12	56.3	91	95	95.8	96.7	3247.28	2706.17	22	869	2494	6528	6828	47.61	39.68	0.32	12.74	36.57	95.72	100.12
RLX-comp_CH95-B-R77-Map14	Z. tritici CH95	CH95	8463	76172	23	5	20	6	87.91	10.23	57.8	86.5	92.35	94.92	96.5	3809.35	3707.19	25	353	2291	8461	8479	45.01	43.8	0.3	4.17	27.07	99.98	100.19
RLX-incomp_CH95-B-G164-Map20_reversed	Z. tritici CH95	CH95	6395	384117	83	49	73	55	93.41	6.33	70.6	93.6	95.5	96.75	97.67	5261.93	2163.96	83	6267	6360	6376	6399	82.28	33.84	1.3	98	99.45	99.7	100.06
RLX-incomp_CH95-B-G174-Map3_reversed	Z. tritici CH95	CH95	6774	8116	3	1	3	1	90.77	12.62	76.2	76.2	97.9	98.2	98.2	2705.33	3567.95	110	110	1232	6774	6774	39.94	52.67	1.62	1.62	18.19	100	100
RLX-incomp_CH95-B-G192-Map18	Z. tritici CH95	CH95	7675	182847	40	17	34	17	95.66	2.84	87.51	96.1	96.8	97.1	97.8	5377.85	2906.97	32	3015	7397	7669	7672	70.07	37.88	0.42	39.28	96.38	99.92	99.96
RLX-incomp_CH95-B-G196-Map4_reversed	Z. tritici CH95	CH95	8279	42847	25	3	24	4	91.07	9.25	54.7	91.4	92.15	96.4	98.8	1785.71	3324.22	30	35	82	476	8284	21.57	40.15	0.36	0.42	0.99	5.75	100.06
RLX-incomp_CH95-B-G227-Map3	Z. tritici CH95	CH95	13412	81735	41	3	30	3	69.58	10.76	55.2	63.46	67.56	70.6	97.3	2724.5	4401.1	62	223	610	2345	13415	20.31	32.81	0.46	1.66	4.55	17.48	100.02
RLX-incomp_CH95-B-P12.21-Map7	Z. tritici CH95	CH95	8269	187212	43	12	35	14	94.4	3.18	80.22	93.8	94.8	96.1	100	5584.97	2903.85	29	2363	6432	8256	8446	67.54	35.12	0.35	28.58	77.78	99.84	102.14
RLX-incomp_CH95-B-P3.29-Map12_reversed	Z. tritici CH95	CH95	9524	180585	46	13	40	14	90.57	5.74	77.3	88.1	92.31	95.5	97	4514.62	4447.65	87	174	1303	9458	9501	47.4	46.7	0.91	1.83	13.68	99.31	99.76
RLX-incomp_CH95-B-P30.3-Map3_reversed	Z. tritici CH95	CH95	4825	8206	13	1	12	1	78.85	15.01	56.7	66.8	79.95	91.5	100	683.83	1354.67	28	161	221	577	4825	14.17	28.08	0.58	3.34	4.58	11.96	100
RLX-incomp_CH95-B-R285-Map9	Z. tritici CH95	CH95	13843	448842	126	6	91	15	86.05	11.39	57.2	81	91.74	93.8	96.2	4932.33	5377.32	30	308	2419	11182	13932	35.63	38.85	0.22	2.22	17.47	80.78	100.64
RLX-incomp_CH95-B-R295-Map3_reversed	Z. tritici CH95	CH95	971	9378	24	2	24	2	82.39	9.73	64.8	77.2	81.2	91.8	98.9	390.75	321.93	36	126	177.5	702	973	40.24	33.15	3.71	12.98	18.28	72.3	100.21
RLX-incomp_CH95-B-R309-Map8_reversed	Z. tritici CH95	CH95	8380	89010	47	4	38	6	88.76	9.48	53.2	83.2	90.6	96.5	100	2342.39	3257.03	29	49	257	5639	8413	27.95	38.87	0.35	0.58	3.07	67.29	100.39
RLX-incomp_CH95-B-R317-Map3	Z. tritici CH95	CH95	2216	23354	21	5	21	5	73.5	9.65	59.1	67.4	70.8	76.5	99.8	1112.1	824.85	35	319	1083	1544	2224	50.18	37.22	1.58	14.4	48.87	69.68	100.36
RLX-incomp_CH95-B-R351-Map4	Z. tritici CH95	CH95	2498	14683	11	3	11	3	79.52	15.69	61.4	66.2	69.8	96.1	97.2	1334.82	948.49	107	331	1255	2497	2498	53.44	37.97	4.28	13.25	50.24	99.96	100
RLX-incomp_CH95-B-R352-Map3	Z. tritici CH95	CH95	1812	8086	7	2	7	2	81.39	14.99	68.5	69.2	70.1	97.5	98	1155.14	729.94	304	385	1203	1812	1986	63.75	40.28	16.78	21.25	66.39	100	109.6
RLX-incomp_CH95-B-R57-Map3_reversed	Z. tritici CH95	CH95	1916	18212	18	4	15	6	82.6	12.28	59.8	72.1	88.25	91.2	98.8	1214.13	732.56	39	722	1366	1875	1916	63.37	38.23	2.04	37.68	71.29	97.86	100
RXX_CH95-B-R193-Map3	Z. tritici CH95	CH95	1681	9315	22	3	21	3	87.18	9.28	66.5	81	86	97.3	98.2	443.57	586	38	102	224	273	1682	26.39	34.86	2.26	6.07	13.33	16.24	100.06
RXX-TRIM_CH95-B-G265-Map5	Z. tritici CH95	CH95	600	5473	13	5	13	5	91.18	6.42	76.3	91.2	93.3	95.2	95.8	421	198.22	92	289	469	600	613	70.17	33.04	15.33	48.17	78.17	100	102.17
RXX-TRIM_CH95-B-G284-Map4	Z. tritici CH95	CH95	548	3956	8	7	8	7	90.4	5.06	84.6	86.4	90.3	95.8	97.2	494.5	118.93	201	527	534.5	544	550	90.24	21.7	36.68	96.17	97.54	99.27	100.36
RXX-TRIM_CH95-B-R308-Map3	Z. tritici CH95	CH95	552	2366	8	2	7	3	91.81	6.51	82.8	85.3	95.5	97	98.4	338	236.73	25	67	440	553	555	61.23	42.89	4.53	12.14	79.71	100.18	100.54
RXX-TRIM_CH95-B-R4-Map4	Z. tritici CH95	CH95	723	5989	21	1900-01-03	21	3	92.61	5.18	81.7	88.2	94.1	97.2	98.9	285.19	229.56	41	60	323	372	748	39.45	31.75	5.67	8.3	44.67	51.45	103.46
DHX-incomp_CNR93-B-G137-Map5_reversed	Z. tritici CNR93	CNR93	6144	69526	21	1900-01-08	20	8	95.11	2.46	86.4	94.8	95.15	96.4	98.5	3476.3	2538.3	28	1697	3840.5	6102	6186	56.58	41.31	0.46	27.62	62.51	99.32	100.68
DHX-incomp_CNR93-B-G176-Map6_reversed	Z. tritici CNR93	CNR93	8631	31708	21	3	21	3	83.71	11.66	60.1	75.2	84.5	95.5	97.3	1515.33	3114.83	23	71	124	181	8761	17.56	36.09	0.27	0.82	1.44	2.1	101.51
DHX-incomp_CNR93-B-G209-Map6_reversed	Z. tritici CNR93	CNR93	13734	212590	57	1900-01-07	50	10	84.63	11.11	68.3	73.8	86.75	95.53	96.9	4251.8	5512.32	25	245	1186	8296	13757	30.96	40.14	0.18	1.78	8.64	60.4	100.17
DMX-incomp_CNR93-B-G210-Map8	Z. tritici CNR93	CNR93	11518	116026	36	8	34	9	90.96	9.3	56.6	85.99	95.1	96.4	99	3412.53	5113.69	26	30	77	11476	11532	29.63	44.4	0.23	0.26	0.67	99.64	100.12
DMX-incomp_CNR93-B-G9-Map20	Z. tritici CNR93	CNR93	11408	79043	30	5	24	5	86.61	9.97	67.29	84.2	91.05	93.8	96.4	3293.46	4694.66	26	96	701.5	8773	11713	28.87	41.15	0.23	0.84	6.15	76.9	102.67
DMX-incomp_CNR93-B-R96-Map20	Z. tritici CNR93	CNR93	11101	174416	64	6	57	7	89.5	6.72	76.1	83.6	89.5	96.4	99.2	3059.93	3986.44	28	53	1155	4220	11265	27.56	35.91	0.25	0.48	10.4	38.01	101.48
DTX-comp_CNR93-B-G32-Map5_reversed	Z. tritici CNR93	CNR93	4125	9693	14	1	14	1	84.11	8	74.1	77.9	82.15	93	100	692.36	1312.65	43	119	135	196	4125	16.78	31.82	1.04	2.88	3.27	4.75	100
DTX-comp_CNR93-B-G406-Map4	Z. tritici CNR93	CNR93	2204	17942	16	7	14	7	85.25	8.89	72.3	80.1	81.8	95.7	98.1	1281.57	1007.88	32	79	1713	2201	2204	58.15	45.73	1.45	3.58	77.72	99.86	100
DTX-comp_CNR93-B-G445-Map3_reversed	Z. tritici CNR93	CNR93	3001	12390	14	3	13	3	86.92	7.58	74.7	80.8	85	95	97.8	953.08	1285.73	40	47	68	1793	3001	31.76	42.84	1.33	1.57	2.27	59.75	100
DTX-comp_CNR93-B-G67-Map7	Z. tritici CNR93	CNR93	3135	25067	10	1900-01-07	9	8	95.37	5.42	82.75	96.7	97.6	98.4	99	2785.22	1029.1	41	3126	3130	3131	3133	88.84	32.83	1.31	99.71	99.84	99.87	99.94
DTX-comp_CNR93-B-P18.30-Map8_reversed	Z. tritici CNR93	CNR93	3437	38051	19	1900-01-09	18	9	83.28	12.91	67	71.95	78.35	97.7	98.4	2113.94	1480.43	26	325	2811	3434	3448	61.51	43.07	0.76	9.46	81.79	99.91	100.32
DTX-comp_CNR93-B-P21.27-Map3	Z. tritici CNR93	CNR93	1341	5627	5	4	5	4	93.76	4.74	85.6	94.2	95	96.5	97.5	1125.4	470.95	283	1326	1338	1339	1341	83.92	35.12	21.1	98.88	99.78	99.85	100
DTX-comp_CNR93-B-P28.20-Map6_reversed	Z. tritici CNR93	CNR93	3538	17881	8	5	8	5	91.25	9.52	77.6	81.2	97.7	98.5	98.7	2235.12	1794.55	62	76	3533	3537	3538	63.17	50.72	1.75	2.15	99.86	99.97	100
DTX-comp_CNR93-B-P33.16-Map4	Z. tritici CNR93	CNR93	3200	22489	9	6	8	6	90.6	10.58	72.89	88.2	94.8	99.1	99.2	2811.12	929.11	538	3163	3198	3199	3200	87.85	29.03	16.81	98.84	99.94	99.97	100
DTX-comp_CNR93-B-P42.7-Map3_reversed	Z. tritici CNR93	CNR93	3161	9476	3	1900-01-03	3	3	99.07	0.59	98.4	98.4	99.3	99.5	99.5	3158.67	2.31	3156	3156	3160	3160	3160	99.93	0.07	99.84	99.84	99.97	99.97	99.97
DTX-comp_CNR93-B-P51.49-Map5_reversed	Z. tritici CNR93	CNR93	2917	18924	14	5	14	5	84.26	12.35	67.5	72.2	84.85	98.2	98.7	1351.71	1292.21	55	151	1056.5	2913	2914	46.34	44.3	1.89	5.18	36.22	99.86	99.9
DTX-comp_CNR93-B-P57.55-Map3	Z. tritici CNR93	CNR93	2213	12122	9	3	8	4	92.81	5.23	82.8	92.1	93.84	96.4	100	1515.25	957.42	137	698	2137	2213	2293	68.47	43.26	6.19	31.54	96.57	100	103.62
DTX-comp_CNR93-B-R113-Map5_reversed	Z. tritici CNR93	CNR93	3455	17520	19	3	17	3	82.91	12.07	66.8	69	83	91.8	99.3	1030.59	1281.32	28	49	155	1386	3455	29.83	37.09	0.81	1.42	4.49	40.12	100
DTX-comp_CNR93-B-R138-Map6_reversed	Z. tritici CNR93	CNR93	2215	26151	28	4	17	8	84.45	9.75	68.3	75.43	80.84	95.1	97	1538.29	904.51	33	792	2068	2196	2218	69.45	40.84	1.49	35.76	93.36	99.14	100.14
DTX-comp_CNR93-B-R237-Map3	Z. tritici CNR93	CNR93	3016	29043	20	6	16	8	84.66	6.65	74.38	83.1	84.28	86.1	100	1815.19	1297.16	48	856	2431.5	2992	3016	60.19	43.01	1.59	28.38	80.62	99.2	100
DTX-comp_CNR93-B-R310-Map4	Z. tritici CNR93	CNR93	1340	7635	6	5	6	5	89.5	7.13	80.3	84.6	89.45	95.3	97.9	1272.5	126.01	1017	1304	1321	1334	1338	94.96	9.4	75.9	97.31	98.58	99.55	99.85
DTX-comp_CNR93-B-R320-Map4_reversed	Z. tritici CNR93	CNR93	2193	24682	25	8	21	10	84.28	8.32	74.5	77.1	82.3	91.1	97.3	1175.33	1061.48	33	57	1996	2189	2210	53.59	48.4	1.5	2.6	91.02	99.82	100.78
DTX-comp_CNR93-B-R322-Map3_reversed	Z. tritici CNR93	CNR93	3583	10542	3	2	3	2	98.4	0.36	98	98	98.5	98.7	98.7	3514	116.06	3380	3380	3579	3583	3583	98.07	3.24	94.33	94.33	99.89	100	100
DTX-comp_CNR93-B-R346-Map6_reversed	Z. tritici CNR93	CNR93	3291	17716	15	3	15	3	90.51	9.82	70.6	82.9	95.3	98.1	98.3	1184.07	1304.37	45	53	834	2713	3326	35.98	39.63	1.37	1.61	25.34	82.44	101.06
DTX-comp_CNR93-B-R349-Map3_reversed	Z. tritici CNR93	CNR93	3245	10194	6	3	6	3	87.57	9.55	76.2	77.9	88	96.1	99.2	1699	1708.78	71	134	1729.5	3261	3269	52.36	52.66	2.19	4.13	53.3	100.49	100.74
DTX-comp_CNR93-B-R53-Map6	Z. tritici CNR93	CNR93	3456	31230	16	7	14	8	83.5	10.6	70.6	74.2	79.44	96.9	98.6	2230.71	1636.18	90	134	3367.5	3455	3456	64.55	47.34	2.6	3.88	97.44	99.97	100
DTX-comp_CNR93-B-R72-Map14_reversed	Z. tritici CNR93	CNR93	3544	17560	11	1	9	2	89.18	6.95	75.1	87.7	92.16	93.86	96.2	1951.11	1654.08	31	267	3142	3311	3545	55.05	46.67	0.87	7.53	88.66	93.43	100.03
DTX-incomp_CNR93-B-G109-Map4	Z. tritici CNR93	CNR93	5415	32705	15	2	12	3	92.28	4.6	82	92.5	93.75	95.6	96.2	2725.42	2255.44	50	844	2610.5	5407	5421	50.33	41.65	0.92	15.59	48.21	99.85	100.11
DTX-incomp_CNR93-B-G12-Map10	Z. tritici CNR93	CNR93	3476	23249	11	4	10	5	87.06	12	58.4	82	90	96.1	97.6	2324.9	1485.01	21	548	3153.5	3327	3511	66.88	42.72	0.6	15.77	90.72	95.71	101.01
DTX-incomp_CNR93-B-G201-Map17	Z. tritici CNR93	CNR93	7939	134918	21	16	21	16	98.3	1.22	95.1	97.8	98.7	99	100	6424.67	3058.77	50	7820	7929	7930	7941	80.93	38.53	0.63	98.5	99.87	99.89	100.03
DTX-incomp_CNR93-B-G302-Map4	Z. tritici CNR93	CNR93	874	4603	8	5	8	5	92.81	5.68	83.1	89.5	94.8	97.7	97.8	575.38	407.41	42	146	865.5	872	874	65.83	46.61	4.81	16.7	99.03	99.77	100
DTX-incomp_CNR93-B-G422-Map10	Z. tritici CNR93	CNR93	2359	37740	26	10	24	11	92.2	7.04	72.6	91	95.55	96.9	97.2	1572.5	1017.91	34	362	2244.5	2353	2522	66.66	43.15	1.44	15.35	95.15	99.75	106.91
DTX-incomp_CNR93-B-P19.29-Map7_reversed	Z. tritici CNR93	CNR93	4010	62591	45	9	37	12	78.69	9.94	62	71.51	77.2	81.8	98.5	1691.65	1818.56	67	132	402	4003	4054	42.19	45.35	1.67	3.29	10.02	99.83	101.1
DTX-incomp_CNR93-B-P27.21-Map11	Z. tritici CNR93	CNR93	5452	65972	16	12	15	12	95.37	6.75	76.8	91.5	98.4	99.2	99.7	4398.13	2148.54	85	5414	5429	5446	5449	80.67	39.41	1.56	99.3	99.58	99.89	99.94
DTX-incomp_CNR93-B-P7.41-Map6	Z. tritici CNR93	CNR93	7301	59660	26	6	22	7	91.03	7.38	67.27	90.08	90.9	97.9	98.6	2711.82	3421	29	66	76.5	7292	7323	37.14	46.86	0.4	0.9	1.05	99.88	100.3
DTX-incomp_CNR93-B-P8.40-Map7	Z. tritici CNR93	CNR93	6106	42845	9	7	9	7	93.82	6.75	81	96.9	97	97.4	97.5	4760.56	2661.56	60	6101	6101	6102	6104	77.97	43.59	0.98	99.92	99.92	99.93	99.97
DTX-incomp_CNR93-B-R103-Map3_reversed	Z. tritici CNR93	CNR93	3200	24781	33	7	32	7	84.23	7.16	71	78.7	84.35	88.9	98.4	774.41	1316	35	49	78.5	447	3269	24.2	41.13	1.09	1.53	2.45	13.97	102.16
DTX-incomp_CNR93-B-R112-Map8	Z. tritici CNR93	CNR93	3576	24708	23	1900-01-02	19	3	80.17	13.51	57	69.6	79	92.8	98.2	1300.42	1227.2	49	247	828	1817	3567	36.37	34.32	1.37	6.91	23.15	50.81	99.75
DTX-incomp_CNR93-B-R136-Map6	Z. tritici CNR93	CNR93	2924	20164	18	1900-01-02	16	2	83.07	13.08	60.9	69.27	85.5	97.1	99.1	1260.25	1071.5	38	140	1237	2071	2922	43.1	36.64	1.3	4.79	42.31	70.83	99.93
DTX-incomp_CNR93-B-R154-Map5	Z. tritici CNR93	CNR93	3448	56643	41	6	29	10	84.74	10.61	70.4	74.6	89.9	94.3	100	1953.21	1499.57	25	113	2791	3402	3463	56.65	43.49	0.73	3.28	80.95	98.67	100.44
DTX-incomp_CNR93-B-R155-Map5	Z. tritici CNR93	CNR93	5489	49430	17	1900-01-06	14	8	88.37	9.77	68.2	83.6	91.37	96.8	97.4	3530.71	2487.29	32	69	5426	5489	5522	64.32	45.31	0.58	1.26	98.85	100	100.6
DTX-incomp_CNR93-B-R164-Map9_reversed	Z. tritici CNR93	CNR93	8833	62619	82	1900-01-02	80	2	75.15	8.34	61.3	70.4	71.95	76	99.9	782.74	1617.02	21	170	355	611	8859	8.86	18.31	0.24	1.92	4.02	6.92	100.29
DTX-incomp_CNR93-B-R17-Map3	Z. tritici CNR93	CNR93	3874	48990	48	5	40	8	79.91	6.15	72	75.6	78.75	82.8	100	1224.75	1662.91	29	124	179.5	3525	3882	31.61	42.92	0.75	3.2	4.63	90.99	100.21
DTX-incomp_CNR93-B-R180-Map3_reversed	Z. tritici CNR93	CNR93	2653	31311	21	5	18	7	79.56	8.54	65.6	73.7	78.7	80.8	100	1739.5	998.99	73	812	2148.5	2612	2653	65.57	37.65	2.75	30.61	80.98	98.45	100
DTX-incomp_CNR93-B-R20-Map8	Z. tritici CNR93	CNR93	5353	59167	22	6	18	9	89.94	5.74	74	87.2	89.87	93.5	98.6	3287.06	2552	36	47	5003	5386	5435	61.41	47.67	0.67	0.88	93.46	100.62	101.53
DTX-incomp_CNR93-B-R208-Map5	Z. tritici CNR93	CNR93	5432	28229	12	1900-01-03	10	4	91.25	6.23	80	87.91	90.26	97.8	98.8	2822.9	2608.21	40	67	2744.5	5432	5491	51.97	48.02	0.74	1.23	50.52	100	101.09
DTX-incomp_CNR93-B-R220-Map3	Z. tritici CNR93	CNR93	662	3991	7	6	7	6	84.1	12	68.6	76.1	77.8	98.2	98.9	570.14	239.95	26	660	660	662	662	86.12	36.25	3.93	99.7	99.7	100	100
DTX-incomp_CNR93-B-R227-Map7	Z. tritici CNR93	CNR93	2961	20936	17	5	17	5	85.02	13.51	60.8	69.1	88.2	96.4	98	1231.53	1308.11	26	51	450	2896	2940	41.59	44.18	0.88	1.72	15.2	97.8	99.29
DTX-incomp_CNR93-B-R245-Map5_reversed	Z. tritici CNR93	CNR93	3538	42333	52	1900-01-07	44	10	83.76	7.97	67.9	78.3	81.15	91	100	962.11	1455.23	27	57	113	2525	3564	27.19	41.13	0.76	1.61	3.19	71.37	100.73
DTX-incomp_CNR93-B-R248-Map4_reversed	Z. tritici CNR93	CNR93	4820	18554	10	3	8	3	83.86	10.78	68.62	79	84.95	93.2	99.4	2319.25	2124.2	61	765	1266.5	4827	4886	48.12	44.07	1.27	15.87	26.28	100.15	101.37
DTX-incomp_CNR93-B-R32-Map9	Z. tritici CNR93	CNR93	3713	24086	26	2	24	3	88.88	9.12	69.3	81.6	92.9	97.5	98.1	1003.58	1371.09	28	75	237	1453	3719	27.03	36.93	0.75	2.02	6.38	39.13	100.16
DTX-incomp_CNR93-B-R40-Map13	Z. tritici CNR93	CNR93	7151	57044	13	6	12	6	92.64	7.73	72.3	94.9	95.47	96.2	97.5	4753.67	2709.8	65	2814	5692.5	7126	7139	66.48	37.89	0.91	39.35	79.6	99.65	99.83
DTX-incomp_CNR93-B-R48-Map3	Z. tritici CNR93	CNR93	5456	22849	10	3	7	4	90	13.81	59.4	90.98	96.3	97.5	97.8	3264.14	2719.16	27	79	5389	5463	5465	59.83	49.84	0.49	1.45	98.77	100.13	100.16
DTX-incomp_CNR93-B-R63-Map7	Z. tritici CNR93	CNR93	5365	64513	19	1900-01-07	17	8	88.4	7.86	64.4	85.87	88.8	91.97	98	3794.88	2003.66	40	2018	4886	5377	5633	70.73	37.35	0.75	37.61	91.07	100.22	105
DXX-MITE_CNR93-B-G241-Map4	Z. tritici CNR93	CNR93	418	3813	14	5	13	5	84.65	12.97	61.8	74.8	83	98.3	99.5	295.77	161.8	39	170	395	417	448	70.76	38.71	9.33	40.67	94.5	99.76	107.18
DXX-MITE_CNR93-B-G244-Map4	Z. tritici CNR93	CNR93	500	2034	4	4	4	4	97.65	1.11	96	98	98.1	98.4	98.4	508.5	10.47	498	501	509	518	518	101.7	2.09	99.6	100.2	101.8	103.6	103.6
DXX-MITE_CNR93-B-G251-Map3	Z. tritici CNR93	CNR93	487	1940	4	4	4	4	95.55	6.34	86.1	97.7	98.35	99.4	99.4	485	3.37	480	486	486.5	487	487	99.59	0.69	98.56	99.79	99.9	100	100
DXX-MITE_CNR93-B-G256-Map3	Z. tritici CNR93	CNR93	495	1943	4	1900-01-03	4	3	92.3	14.87	70	99.4	99.6	100	100	485.75	16.56	461	492	493.5	495	495	98.13	3.35	93.13	99.39	99.7	100	100
DXX-MITE_CNR93-B-G267-Map15	Z. tritici CNR93	CNR93	574	6453	14	11	13	11	95.36	5.47	78	94.9	97	98.2	98.88	496.38	179.5	86	567	570	571	574	86.48	31.27	14.98	98.78	99.3	99.48	100
DXX-MITE_CNR93-B-P2.45-Map5	Z. tritici CNR93	CNR93	494	2997	8	6	8	6	90.01	8.95	78.7	79.6	95.6	97.2	97.3	374.62	210.98	24	476	489	493	493	75.84	42.71	4.86	96.36	98.99	99.8	99.8
DXX-MITE_CNR93-B-P25.23-Map6	Z. tritici CNR93	CNR93	633	3932	9	6	9	6	94.99	4.81	83.7	95.5	97.3	97.8	97.9	436.89	295.9	42	43	627	629	664	69.02	46.75	6.64	6.79	99.05	99.37	104.9
DXX-MITE_CNR93-B-P30.18-Map5	Z. tritici CNR93	CNR93	361	1424	4	4	4	4	99.1	0.7	98.1	99.2	99.3	99.7	99.7	356	6.16	347	357	358.5	360	360	98.61	1.71	96.12	98.89	99.31	99.72	99.72
DXX-MITE_CNR93-B-R174-Map3	Z. tritici CNR93	CNR93	512	2313	7	4	7	4	87.57	9.9	77.4	78.6	82.1	97.8	98.6	330.43	228.9	24	77	502	512	518	64.54	44.71	4.69	15.04	98.05	100	101.17
DXX-MITE_CNR93-B-R93-Map3	Z. tritici CNR93	CNR93	460	3024	14	2	12	4	89.47	7.28	78.83	85.6	88.35	98.77	99.3	252	173.84	45	117	192	456	470	54.78	37.79	9.78	25.43	41.74	99.13	102.17
noCat_CNR93-B-G149-Map13	Z. tritici CNR93	CNR93	7327	72380	50	1	47	1	89.37	9.26	69	77.9	92.9	96.9	100	1560.15	1956.99	28	172	642	2275	7325	21.29	26.71	0.38	2.35	8.76	31.05	99.97
noCat_CNR93-B-R132-Map12	Z. tritici CNR93	CNR93	821	22726	32	10	32	10	93.2	4.34	87	89.4	92.85	98.4	99.1	710.19	207.59	73	752	771.5	804	921	86.5	25.28	8.89	91.6	93.97	97.93	112.18
noCat_CNR93-B-R28-Map20	Z. tritici CNR93	CNR93	851	129577	170	52	167	52	91.71	2.29	73.5	90.8	91.7	92.72	97.1	775.91	143.74	22	763	787	836	926	91.18	16.89	2.59	89.66	92.48	98.24	108.81
noCat_CNR93-B-R52-Map16	Z. tritici CNR93	CNR93	886	57918	73	28	73	28	91.12	3.25	86.2	88.7	90	92.8	98	793.4	173.35	28	809	829	861	933	89.55	19.57	3.16	91.31	93.57	97.18	105.3
noCat_CNR93-B-R65-Map20	Z. tritici CNR93	CNR93	9797	17353	16	1	13	1	86.88	8.72	73.15	77.9	90.6	94.6	96.1	1336.62	2525.11	58	125	382	1023	9456	13.64	25.77	0.59	1.28	3.9	10.44	96.52
RIX-comp_CNR93-B-G124-Map20	Z. tritici CNR93	CNR93	5813	374195	101	46	97	46	95.72	2.97	74.5	95.3	96.1	97.2	99	3857.68	2059.96	35	1681	4755	5581	5748	66.36	35.44	0.6	28.92	81.8	96.01	98.88
RIX-comp_CNR93-B-G138-Map3	Z. tritici CNR93	CNR93	7369	8233	5	1	5	1	92.72	6.48	82.1	90.9	96.4	97	97.2	1646.6	3200.5	95	121	263	386	7368	22.34	43.43	1.29	1.64	3.57	5.24	99.99
RIX-comp_CNR93-B-G6-Map9_reversed	Z. tritici CNR93	CNR93	9328	65076	36	4	35	4	86.55	9.13	62.4	80.8	90	94.4	96.5	1859.31	3256.25	35	97	246	1316	9671	19.93	34.91	0.38	1.04	2.64	14.11	103.68
RIX-comp_CNR93-B-R148-Map15	Z. tritici CNR93	CNR93	12688	204008	109	2	77	2	87.65	7.76	69.7	81	91.2	93.48	97.5	2651.74	3471.97	33	280	923	3427	12483	20.9	27.36	0.26	2.21	7.27	27.01	98.38
RIX-comp_CNR93-B-R268-Map4_reversed	Z. tritici CNR93	CNR93	6911	44080	23	2	20	3	74.77	14.07	56	66.37	72.75	92.9	98.2	2204	2444.9	28	209	1475.5	4040	6911	31.89	35.38	0.41	3.02	21.35	58.46	100
RIX-comp_CNR93-B-R388-Map3_reversed	Z. tritici CNR93	CNR93	3764	10672	4	2	3	2	98.64	0.73	97.8	97.8	99.03	99.1	99.1	3557.33	378.05	3121	3121	3764	3787	3787	94.51	10.04	82.92	82.92	100	100.61	100.61
RIX-comp_CNR93-B-R8-Map20	Z. tritici CNR93	CNR93	5631	129425	40	18	40	18	97.7	3.2	86.4	98.1	98.75	99.1	100	3235.62	2339.63	44	798	3599	5580	5600	57.46	41.55	0.78	14.17	63.91	99.09	99.45
RIX-incomp_CNR93-B-R141-Map3_reversed	Z. tritici CNR93	CNR93	2883	5277	3	1	3	1	89.7	10.07	78.1	78.1	94.8	96.2	96.2	1759	1330.44	251	251	2259	2767	2767	61.01	46.15	8.71	8.71	78.36	95.98	95.98
RIX-incomp_CNR93-B-R377-Map3	Z. tritici CNR93	CNR93	5380	9305	3	1	3	1	97.6	0.89	96.9	96.9	97.3	98.6	98.6	3101.67	2703.73	142	142	3721	5442	5442	57.65	50.26	2.64	2.64	69.16	101.15	101.15
RLX-comp_CNR93-B-G146-Map19_reversed	Z. tritici CNR93	CNR93	6835	185707	82	1900-01-11	69	15	87.52	12.64	55.4	82.3	93.9	95.5	99.3	2691.54	2744.6	24	174	1204	5732	7006	39.38	40.16	0.35	2.55	17.62	83.86	102.5
RLX-comp_CNR93-B-G177-Map8	Z. tritici CNR93	CNR93	6964	77352	31	5	29	5	88.85	10.51	66.7	81.4	95.8	96.7	97.5	2669.76	2622.79	44	347	1912	4430	6958	38.34	37.66	0.63	4.98	27.46	63.61	99.91
RLX-comp_CNR93-B-G205-Map4	Z. tritici CNR93	CNR93	12593	110588	35	1	31	2	91.07	8.18	71.4	86.1	95.5	96.3	100	3567.35	3928.52	31	257	2433	5255	12591	28.33	31.2	0.25	2.04	19.32	41.73	99.98
RLX-comp_CNR93-B-P47.2-Map3_reversed	Z. tritici CNR93	CNR93	6270	140160	69	8	61	13	83.73	14.04	55.3	67.6	93.3	95	98.4	2297.75	2463.1	21	283	1110	4903	6437	36.65	39.28	0.33	4.51	17.7	78.2	102.66
RLX-comp_CNR93-B-R13-Map12_reversed	Z. tritici CNR93	CNR93	8463	94502	18	10	18	10	93.59	4.74	79.1	91.3	94.8	96.8	99.7	5250.11	3876.23	98	303	8334	8461	8468	62.04	45.8	1.16	3.58	98.48	99.98	100.06
RLX-comp_CNR93-B-R240-Map3_reversed	Z. tritici CNR93	CNR93	5034	23954	19	2	18	2	78.93	9.69	68	72.4	75.55	82	98.8	1330.78	1894.88	88	184	273.5	2588	5048	26.44	37.64	1.75	3.66	5.43	51.41	100.28
RLX-comp_CNR93-B-R85-Map20_reversed	Z. tritici CNR93	CNR93	6372	184657	52	24	49	25	91.3	10.75	55.8	93.2	95.5	96.6	98.5	3768.51	2847.64	21	280	6164	6295	6436	59.14	44.69	0.33	4.39	96.74	98.79	101
RLX-incomp_CNR93-B-G101-Map20_reversed	Z. tritici CNR93	CNR93	6453	19216	6	1	5	1	96.58	3.14	92.4	94	98.7	98.9	98.92	3843.2	2237.53	1290	1816	4431	5104	6575	59.56	34.67	19.99	28.14	68.67	79.09	101.89
RLX-incomp_CNR93-B-G167-Map20	Z. tritici CNR93	CNR93	6817	286572	77	23	63	30	95.42	1.23	92.6	94.7	95.5	96.1	100	4553.1	2692.52	24	1562	6003	6802	6820	66.79	39.5	0.35	22.91	88.06	99.78	100.04
RLX-incomp_CNR93-B-G171-Map5	Z. tritici CNR93	CNR93	6653	69766	27	6	27	6	93.15	5.7	74.9	91.6	93.2	98.5	99.8	2583.93	2712.69	27	129	1199	4412	6653	38.84	40.77	0.41	1.94	18.02	66.32	100
RLX-incomp_CNR93-B-G193-Map8	Z. tritici CNR93	CNR93	8302	125317	33	7	29	10	93.29	8.73	57.5	94.8	95.77	96.4	97.1	4321.28	3257.46	33	1239	3785	8259	8454	52.05	39.24	0.4	14.92	45.59	99.48	101.83
RLX-incomp_CNR93-B-G198-Map5_reversed	Z. tritici CNR93	CNR93	8306	34367	12	4	12	4	80.41	19.28	55.9	57.7	93	97.6	98	2863.92	4024.48	22	28	110	8305	8309	34.48	48.45	0.26	0.34	1.32	99.99	100.04
RLX-incomp_CNR93-B-G21-Map20_reversed	Z. tritici CNR93	CNR93	3906	9279	10	1	10	1	90.2	6.1	76.2	88.8	91.6	94.6	96.8	927.9	1285.39	45	56	512.5	856	4000	23.76	32.91	1.15	1.43	13.12	21.92	102.41
RLX-incomp_CNR93-B-G212-Map20_reversed	Z. tritici CNR93	CNR93	14023	461245	102	9	72	15	92.42	3.54	75.7	91.8	93.42	94.4	95.7	6406.18	5147.37	39	1326	5578	10990	14163	45.68	36.71	0.28	9.46	39.78	78.37	101
RLX-incomp_CNR93-B-G353-Map8	Z. tritici CNR93	CNR93	1475	13191	17	1900-01-06	16	6	87.42	13.41	62.76	73.5	93.25	99.7	99.9	824.44	528.1	388	398	402	1475	1475	55.89	35.8	26.31	26.98	27.25	100	100
RLX-incomp_CNR93-B-G386-Map7	Z. tritici CNR93	CNR93	2360	24835	15	10	15	10	90.25	12.82	61.2	91.7	97.2	97.9	98.6	1655.67	1031.94	156	334	2359	2360	2361	70.16	43.73	6.61	14.15	99.96	100	100.04
RLX-incomp_CNR93-B-G58-Map5_reversed	Z. tritici CNR93	CNR93	4645	25896	24	1	21	1	85.76	12.5	60.9	79	87.2	98.1	98.8	1233.14	1448.61	39	222	259	1837	4645	26.55	31.19	0.84	4.78	5.58	39.55	100
RLX-incomp_CNR93-B-P12.36-Map6	Z. tritici CNR93	CNR93	6941	295585	97	23	87	29	91.03	8.9	55.7	92.15	94.1	95.56	98	3479.74	2960.6	46	211	3301	6924	7121	50.13	42.65	0.66	3.04	47.56	99.76	102.59
RLX-incomp_CNR93-B-P32.17-Map15	Z. tritici CNR93	CNR93	9521	288681	92	17	78	19	90.56	5.72	79.2	85.1	92.8	95.62	96.8	3701.04	4134.98	70	187	636	9027	9527	38.87	43.43	0.74	1.96	6.68	94.81	100.06
RLX-incomp_CNR93-B-R187-Map4	Z. tritici CNR93	CNR93	6322	35131	20	3	17	4	75.54	15.63	56.2	65.71	70.9	93.4	98	2066.53	2636.84	25	103	495	4693	6344	32.69	41.71	0.4	1.63	7.83	74.23	100.35
RLX-incomp_CNR93-B-R19-Map20	Z. tritici CNR93	CNR93	8419	117770	34	5	28	9	86.52	13.32	55	84.36	93.34	95.8	97.3	4206.07	3629.34	22	266	4187.5	8274	8366	49.96	43.11	0.26	3.16	49.74	98.28	99.37
RLX-incomp_CNR93-B-R296-Map3	Z. tritici CNR93	CNR93	2576	34085	40	7	37	8	85.34	5.5	74.26	82.7	84.6	88.9	96.7	921.22	964.98	55	123	517	946	2606	35.76	37.46	2.14	4.77	20.07	36.72	101.16
RLX-incomp_CNR93-B-R41-Map11_reversed	Z. tritici CNR93	CNR93	6243	52635	33	2	27	3	79.18	13.55	59.5	68	75.2	95.14	97.6	1950.04	2156.52	21	139	1056	3086	6248	31.24	34.54	0.34	2.23	16.91	49.43	100.08
RLX-incomp_CNR93-B-R42-Map20	Z. tritici CNR93	CNR93	13823	146194	18	9	16	10	95.46	3.6	87.7	94.7	97.26	97.8	98.1	9138.5	6462.31	57	274	13807	13816	13908	66.11	46.75	0.41	1.98	99.88	99.95	100.61
RLX-incomp_CNR93-B-R6-Map20_reversed	Z. tritici CNR93	CNR93	6360	321207	83	39	76	45	91.15	9.55	69.2	91.2	96	96.7	97.5	4226.45	2784.37	21	339	6355	6357	6408	66.45	43.78	0.33	5.33	99.92	99.95	100.75
RLX-incomp_CNR93-B-R74-Map8_reversed	Z. tritici CNR93	CNR93	7169	43990	35	4	31	4	83.23	9.3	57.9	78.9	81.4	90.3	97.02	1419.03	2606.18	31	59	120	287	7156	19.79	36.35	0.43	0.82	1.67	4	99.82
RXX-TRIM_CNR93-B-G297-Map5	Z. tritici CNR93	CNR93	1350	9155	9	3	9	3	83.86	5.82	77.4	80.1	81.3	88.6	93.7	1017.22	411.25	380	606	1077	1347	1517	75.35	30.46	28.15	44.89	79.78	99.78	112.37
RXX-TRIM_CNR93-B-G91-Map4	Z. tritici CNR93	CNR93	5302	15381	10	1900-01-01	9	1	90.97	7.08	77.55	86	92.2	96.7	97.8	1709	1757.29	50	370	1199	2652	5302	32.23	33.14	0.94	6.98	22.61	50.02	100
RXX-TRIM_CNR93-B-R339-Map5	Z. tritici CNR93	CNR93	555	4353	11	5	11	5	93.64	4.29	83.7	91.4	94.7	96.6	98.9	395.73	191.45	129	185	527	553	564	71.3	34.5	23.24	33.33	94.95	99.64	101.62
RXX-TRIM_CNR93-B-R56-Map7	Z. tritici CNR93	CNR93	552	3183	6	5	6	5	92.47	3.72	87.1	88.8	93.6	95	96.7	530.5	4.93	524	526	531	535	536	96.11	0.89	94.93	95.29	96.2	96.92	97.1
DHX-incomp_CRI10-B-P11.25-Map8	Z. tritici CRI10	CRI10	13723	325561	53	14	48	15	94.49	3.68	82.3	94	95.7	96.4	100	6782.75	5699.64	47	456	6371.5	13686	13843	49.43	41.53	0.34	3.32	46.43	99.73	100.87
DHX-incomp_CRI10-B-P22.1-Map3	Z. tritici CRI10	CRI10	11634	118197	21	7	19	7	91.03	7.74	78.5	78.5	95.3	95.7	97.9	6220.89	5084.28	107	107	6850	11619	11667	53.47	43.7	0.92	0.92	58.88	99.87	100.28
DHX-incomp_CRI10-B-R162-Map3_reversed	Z. tritici CRI10	CRI10	8350	9518	10	1	10	1	88.92	4.13	80.8	87.7	88.95	89.9	97.2	951.8	2599.54	75	134	137	138	8350	11.4	31.13	0.9	1.6	1.64	1.65	100
DHX-incomp_CRI10-B-R272-Map4	Z. tritici CRI10	CRI10	7485	31177	23	2	22	2	84.55	10.96	60.8	74.31	88.25	93.5	97.5	1417.14	2493.23	27	75	102.5	1004	7474	18.93	33.31	0.36	1	1.37	13.41	99.85
DHX-incomp_CRI10-B-R285-Map3_reversed	Z. tritici CRI10	CRI10	7945	35501	32	2	26	2	76.01	11.08	57.9	67.9	76.45	83.8	98.3	1365.42	2485.68	68	123	304.5	873	7960	17.19	31.29	0.86	1.55	3.83	10.99	100.19
DHX-incomp_CRI10-B-R71-Map11_reversed	Z. tritici CRI10	CRI10	14668	65169	24	1	23	1	90.55	7.38	68.5	87.3	92.7	97.1	99.7	2833.43	4447.49	45	71	135	3621	14794	19.32	30.32	0.31	0.48	0.92	24.69	100.86
DMX-incomp_CRI10-B-R164-Map6	Z. tritici CRI10	CRI10	11146	66159	23	2	13	4	88.63	4.23	83	85.7	88.76	90	96.5	5089.15	4608.41	42	839	3455	10893	11182	45.66	41.35	0.38	7.53	31	97.73	100.32
DTX-comp_CRI10-B-G482-Map3_reversed	Z. tritici CRI10	CRI10	2207	17509	9	1900-01-07	9	7	85.17	10.69	74.9	75.8	77.4	96.3	96.7	1945.44	494.65	839	2143	2189	2200	2214	88.15	22.41	38.02	97.1	99.18	99.68	100.32
DTX-comp_CRI10-B-G78-Map10_reversed	Z. tritici CRI10	CRI10	3280	46020	23	10	21	10	82.78	9.26	66.2	73.6	84.2	89.6	96.2	2191.43	1422.16	21	212	3028	3272	3293	66.81	43.36	0.64	6.46	92.32	99.76	100.4
DTX-comp_CRI10-B-G93-Map3	Z. tritici CRI10	CRI10	3509	24383	12	4	12	4	85.53	11.87	67.8	76.7	86.8	97.3	98.4	2031.92	1525.77	93	442	2794.5	3507	3551	57.91	43.48	2.65	12.6	79.64	99.94	101.2
DTX-comp_CRI10-B-G97-Map5	Z. tritici CRI10	CRI10	3574	21242	7	1900-01-05	7	5	85.59	13.69	62.6	71.4	87.6	96.8	98.2	3034.57	861.04	1636	1930	3557	3571	3573	84.91	24.09	45.78	54	99.52	99.92	99.97
DTX-comp_CRI10-B-P12.24-Map4_reversed	Z. tritici CRI10	CRI10	2223	19921	17	1900-01-07	17	7	89.01	6.56	77.2	85.1	92.1	93.6	95.8	1171.82	1011.62	38	63	1092	2185	2218	52.71	45.51	1.71	2.83	49.12	98.29	99.78
DTX-comp_CRI10-B-P47.44-Map3	Z. tritici CRI10	CRI10	3606	14405	4	4	4	4	93.8	6.83	83.6	96.6	96.75	98.1	98.1	3601.25	10.53	3593	3593	3598.5	3615	3615	99.87	0.29	99.64	99.64	99.79	100.25	100.25
DTX-comp_CRI10-B-R23-Map5	Z. tritici CRI10	CRI10	4539	23261	11	5	11	5	91.71	6.72	80.9	86.3	89.4	98	100	2114.64	2340.86	25	47	253	4539	4629	46.59	51.57	0.55	1.04	5.57	100	101.98
DTX-comp_CRI10-B-R27-Map17	Z. tritici CRI10	CRI10	3617	38437	20	3	16	5	87.96	9.75	67.34	89	91.07	95.6	100	2402.31	1512.35	25	673	3130	3568	3823	66.42	41.81	0.69	18.61	86.54	98.65	105.7
DTX-comp_CRI10-B-R46-Map13	Z. tritici CRI10	CRI10	2215	23910	24	4	15	7	87.36	10.17	65.5	78.59	90.78	96	97.8	1595.53	908.67	38	502	2193	2210	2408	72.03	41.02	1.72	22.66	99.01	99.77	108.71
DTX-comp_CRI10-B-R60-Map5	Z. tritici CRI10	CRI10	2142	22155	19	1900-01-06	16	8	81.32	10.02	67	76.5	79.09	92.3	97.4	1384.69	897.24	35	414	1809.5	2180	2210	64.64	41.89	1.63	19.33	84.48	101.77	103.17
DTX-comp_CRI10-B-R99-Map4	Z. tritici CRI10	CRI10	4350	28777	24	2	18	4	77.87	11.67	58.9	70.3	74.78	83.3	99	1598.72	1663.92	51	247	717	2500	4349	36.75	38.25	1.17	5.68	16.48	57.47	99.98
DTX-incomp_CRI10-B-G107-Map6	Z. tritici CRI10	CRI10	5479	75725	20	1900-01-11	17	12	90.29	6.18	76.3	88	90.5	95.9	97.6	4454.41	1754.42	48	4517	5357	5421	5460	81.3	32.02	0.88	82.44	97.77	98.94	99.65
DTX-incomp_CRI10-B-G123-Map4	Z. tritici CRI10	CRI10	4039	29787	16	1900-01-06	16	6	83.54	11.67	69.2	73.6	77.85	96.8	98	1861.69	1876.66	71	157	902.5	4027	4184	46.09	46.46	1.76	3.89	22.34	99.7	103.59
DTX-incomp_CRI10-B-G147-Map5	Z. tritici CRI10	CRI10	5495	55582	18	4	15	7	91.93	7.84	73.02	93.4	94.9	96.5	97.2	3705.47	2047.77	780	1158	4804	5471	5507	67.43	37.27	14.19	21.07	87.42	99.56	100.22
DTX-incomp_CRI10-B-G177-Map12	Z. tritici CRI10	CRI10	5614	16847	9	3	9	3	84.04	9.71	70.3	79.7	84.5	94	95.8	1871.89	2669.1	49	70	152	5415	5444	33.34	47.54	0.87	1.25	2.71	96.46	96.97
DTX-incomp_CRI10-B-G237-Map5	Z. tritici CRI10	CRI10	7931	39690	6	5	6	5	97.75	1.13	95.7	97.2	98.2	98.6	98.6	6615	3217.65	47	7927	7927	7931	7931	83.41	40.57	0.59	99.95	99.95	100	100
DTX-incomp_CRI10-B-G258-Map3_reversed	Z. tritici CRI10	CRI10	2179	18039	19	2	16	4	89.96	7.25	70.9	89.3	92.75	94.4	100	1127.44	821.3	75	306	1099.5	2178	2195	51.74	37.69	3.44	14.04	50.46	99.95	100.73
DTX-incomp_CRI10-B-G370-Map3	Z. tritici CRI10	CRI10	872	2876	6	1900-01-03	6	3	93.22	5.57	86.1	88	94.3	98.2	98.4	479.33	430.13	55	65	506.5	871	872	54.97	49.33	6.31	7.45	58.08	99.89	100
DTX-incomp_CRI10-B-G442-Map3	Z. tritici CRI10	CRI10	1329	3245	12	1	12	1	81.83	9.68	72.5	74.1	79.05	95.2	98.4	270.42	340.35	101	129	136.5	262	1329	20.35	25.61	7.6	9.71	10.27	19.71	100
DTX-incomp_CRI10-B-G522-Map4	Z. tritici CRI10	CRI10	2399	13874	10	3	8	4	88.16	8.71	75.12	85.4	90.31	97.2	98.2	1734.25	803.7	455	1468	2022	2399	2406	72.29	33.5	18.97	61.19	84.29	100	100.29
DTX-incomp_CRI10-B-G541-Map5_reversed	Z. tritici CRI10	CRI10	2330	14517	9	6	9	6	91.82	10.78	74.8	79.1	98.2	100	100	1613	1090.12	90	299	2325	2328	2399	69.23	46.79	3.86	12.83	99.79	99.91	102.96
DTX-incomp_CRI10-B-G79-Map3	Z. tritici CRI10	CRI10	3085	6170	2	2	2	2	98	2.83	96	96	98	100	100	3085	0	3085	3085	3085	3085	3085	100	0	100	100	100	100	100
DTX-incomp_CRI10-B-G89-Map5	Z. tritici CRI10	CRI10	4222	33070	18	4	15	5	88.27	9.41	68.8	78.9	92.7	96.63	98	2204.67	1830.25	25	42	2110	4130	4154	52.22	43.35	0.59	0.99	49.98	97.82	98.39
DTX-incomp_CRI10-B-P10.26-Map4_reversed	Z. tritici CRI10	CRI10	1338	4040	6	3	5	3	92.68	11.46	72.5	95.7	95.7	99.5	100	808	711.68	28	29	1308	1337	1338	60.39	53.19	2.09	2.17	97.76	99.93	100
DTX-incomp_CRI10-B-P17.19-Map9	Z. tritici CRI10	CRI10	7299	78961	20	9	14	9	94.35	8.3	71.5	87.83	98.6	99.1	100	5642.71	2854.98	29	5574	7267.5	7287	7293	77.31	39.11	0.4	76.37	99.57	99.84	99.92
DTX-incomp_CRI10-B-P41.38-Map3_reversed	Z. tritici CRI10	CRI10	1336	6622	5	5	5	5	86.98	9.88	77.4	78	85.7	93.8	100	1324.4	14.98	1308	1308	1335	1335	1336	99.13	1.12	97.9	97.9	99.93	99.93	100
DTX-incomp_CRI10-B-R118-Map5	Z. tritici CRI10	CRI10	4162	37075	57	6	47	6	85.79	9.19	63.5	77.3	85.6	94.3	100	790.66	1493.28	35	44	112	299	4312	19	35.88	0.84	1.06	2.69	7.18	103.6
DTX-incomp_CRI10-B-R119-Map5	Z. tritici CRI10	CRI10	5434	19097	14	2	14	2	91.44	10.13	65.9	90.9	96.2	96.6	100	1364.07	2159.64	25	30	108.5	2286	5432	25.1	39.74	0.46	0.55	2	42.07	99.96
DTX-incomp_CRI10-B-R174-Map5	Z. tritici CRI10	CRI10	3998	19712	22	1	20	1	81.06	10.45	64.7	74.2	78.45	92.12	98.4	985.6	1457.47	25	107	131.5	1357	3998	24.65	36.45	0.63	2.68	3.29	33.94	100
DTX-incomp_CRI10-B-R218-Map9_reversed	Z. tritici CRI10	CRI10	2470	17322	26	3	24	3	80.95	9.6	69.4	74	76.9	87	97.9	721.75	805.61	21	158	284	1329	2471	29.22	32.62	0.85	6.4	11.5	53.81	100.04
DTX-incomp_CRI10-B-R230-Map3	Z. tritici CRI10	CRI10	2929	24545	26	4	24	5	81.78	10.33	59.24	75.2	80.5	88.5	98.9	1022.71	1173.41	79	100	179	2476	2938	34.92	40.06	2.7	3.41	6.11	84.53	100.31
DTX-incomp_CRI10-B-R232-Map3	Z. tritici CRI10	CRI10	2837	9273	9	2	9	2	81	13.88	58.9	68.3	85.7	93.7	96.6	1030.33	1156.82	42	54	745	1636	2847	36.32	40.78	1.48	1.9	26.26	57.67	100.35
DTX-incomp_CRI10-B-R277-Map3	Z. tritici CRI10	CRI10	2078	6384	20	2	20	2	84.42	7.95	70.2	79.5	82.7	92.1	99.5	319.2	602.53	34	119	132	156	2079	15.36	29	1.64	5.73	6.35	7.51	100.05
DTX-incomp_CRI10-B-R281-Map4_reversed	Z. tritici CRI10	CRI10	3021	9982	7	2	7	2	87.41	11.53	65.3	79.2	92.9	95.1	97.7	1426	1290.17	47	72	1028	3019	3020	47.2	42.71	1.56	2.38	34.03	99.93	99.97
DTX-incomp_CRI10-B-R286-Map3	Z. tritici CRI10	CRI10	3861	13130	12	1	12	1	79.76	13.37	61.2	71	74.35	96.9	98.2	1094.17	1564.93	33	56	296.5	2955	4087	28.34	40.53	0.85	1.45	7.68	76.53	105.85
DTX-incomp_CRI10-B-R312-Map5	Z. tritici CRI10	CRI10	5416	22154	11	2	7	4	82.65	13.8	62.2	67.7	86.46	95.9	96.5	3164.86	2836.09	79	136	5385	5466	5488	58.44	52.37	1.46	2.51	99.43	100.92	101.33
DTX-incomp_CRI10-B-R321-Map4	Z. tritici CRI10	CRI10	5424	28896	11	4	8	5	87.44	10.23	72.2	78.72	90.49	97.2	98.1	3612	2471.6	426	771	5360.5	5424	5437	66.59	45.57	7.85	14.21	98.83	100	100.24
DTX-incomp_CRI10-B-R349-Map5	Z. tritici CRI10	CRI10	2438	10337	9	3	9	3	87.22	8.88	73.2	79.8	88.1	94.7	97.9	1148.56	1065.01	41	372	494	2428	2438	47.11	43.68	1.68	15.26	20.26	99.59	100
DTX-incomp_CRI10-B-R36-Map15	Z. tritici CRI10	CRI10	5450	59607	25	7	22	9	86.36	8.33	72.2	79.3	86.55	93.9	97.8	2709.41	2527.08	78	95	2713.5	5340	5558	49.71	46.37	1.43	1.74	49.79	97.98	101.98
DTX-incomp_CRI10-B-R370-Map4_reversed	Z. tritici CRI10	CRI10	2239	27694	34	7	29	9	83.62	10.63	62	75	83.5	94.9	100	954.97	968.05	35	106	442	2203	2252	42.65	43.24	1.56	4.73	19.74	98.39	100.58
DTX-incomp_CRI10-B-R395-Map5	Z. tritici CRI10	CRI10	5365	21675	6	3	5	4	90.08	10.75	72.8	86.51	95.8	96.3	99	4335	2314.43	195	5334	5376	5377	5393	80.8	43.14	3.63	99.42	100.21	100.22	100.52
DTX-incomp_CRI10-B-R443-Map4	Z. tritici CRI10	CRI10	2332	9345	10	3	10	3	82.27	12.18	67.2	73.8	75.9	97.7	99.4	934.5	981.36	42	297	544	2332	2332	40.07	42.08	1.8	12.74	23.33	100	100
DTX-incomp_CRI10-B-R54-Map6	Z. tritici CRI10	CRI10	2232	9309	7	3	7	3	89.64	10.41	67.7	86.1	93	97	97.8	1329.86	934.6	144	246	1318	2231	2250	59.58	41.87	6.45	11.02	59.05	99.96	100.81
DTX-incomp_CRI10-B-R58-Map4_reversed	Z. tritici CRI10	CRI10	4640	32254	19	2	17	2	81.3	13.32	63.3	70.1	79.8	97.2	98.4	1897.29	1824.48	21	220	1293	3602	4636	40.89	39.32	0.45	4.74	27.87	77.63	99.91
DTX-incomp_CRI10-B-R85-Map4	Z. tritici CRI10	CRI10	2675	9860	12	2	12	2	85.66	10.7	71.2	80	85.75	98.2	98.8	821.67	971.43	48	119	443	1623	2675	30.72	36.32	1.79	4.45	16.56	60.67	100
DXX-MITE_CRI10-B-G266-Map3	Z. tritici CRI10	CRI10	357	1428	4	1900-01-04	4	4	99.02	0.59	98.3	98.9	99.05	99.7	99.7	357	4.24	354	354	355.5	363	363	100	1.19	99.16	99.16	99.58	101.68	101.68
DXX-MITE_CRI10-B-G310-Map4	Z. tritici CRI10	CRI10	506	3234	6	5	6	5	93.02	10.97	70.9	94.2	97.9	98.4	98.8	539	86.1	494	500	504	518	714	106.52	17.02	97.63	98.81	99.6	102.37	141.11
DXX-MITE_CRI10-B-G326-Map3	Z. tritici CRI10	CRI10	604	5507	9	1900-01-08	9	8	85.73	10.24	71.5	79.8	82	98.2	99	611.89	19.47	580	603	604	632	636	101.31	3.22	96.03	99.83	100	104.64	105.3
DXX-MITE_CRI10-B-P3.33-Map4	Z. tritici CRI10	CRI10	486	1456	3	3	3	3	99.4	0.35	99.2	99.2	99.2	99.8	99.8	485.33	0.58	485	485	485	486	486	99.86	0.12	99.79	99.79	99.79	100	100
DXX-MITE_CRI10-B-P31.7-Map3	Z. tritici CRI10	CRI10	413	2811	11	4	11	4	88.44	8.01	78.6	82.1	87.8	98.1	100	255.55	135.71	58	163	196	413	418	61.88	32.86	14.04	39.47	47.46	100	101.21
DXX-MITE_CRI10-B-P34.4-Map3	Z. tritici CRI10	CRI10	490	5334	28	5	27	5	84.05	6.14	73.9	81.1	83	84.8	97.1	197.56	171.89	38	82	110	391	511	40.32	35.08	7.76	16.73	22.45	79.8	104.29
DXX-MITE_CRI10-B-P40.37-Map3	Z. tritici CRI10	CRI10	499	2234	5	1900-01-03	5	3	93.28	12.23	71.4	98.4	98.6	98.8	99.2	446.8	130.44	215	491	499	499	530	89.54	26.14	43.09	98.4	100	100	106.21
DXX-MITE_CRI10-B-P43.40-Map3	Z. tritici CRI10	CRI10	448	3849	12	1900-01-03	12	3	80.29	10.4	71.5	73	74.9	88.1	100	320.75	152.31	46	161	407	438	448	71.6	34	10.27	35.94	90.85	97.77	100
DXX-MITE_CRI10-B-P8.28-Map4	Z. tritici CRI10	CRI10	628	3251	6	5	6	5	92.25	8.72	78.6	83.8	97.45	98.1	98.1	541.83	231.83	69	626	631	645	649	86.28	36.92	10.99	99.68	100.48	102.71	103.34
DXX-MITE_CRI10-B-R424-Map3	Z. tritici CRI10	CRI10	346	1294	4	3	4	3	94.67	9.66	80.2	98.8	99.25	100	100	323.5	40.47	263	339	342.5	346	346	93.5	11.7	76.01	97.98	98.99	100	100
noCat_CRI10-B-G174-Map20	Z. tritici CRI10	CRI10	5972	45796	16	3	15	3	95.23	2.35	87.6	94.7	95.7	96.5	97.6	3053.07	2103.35	151	990	2735	5327	5781	51.12	35.22	2.53	16.58	45.8	89.2	96.8
noCat_CRI10-B-R14-Map20	Z. tritici CRI10	CRI10	916	52757	68	7	67	7	87.1	3.83	72.9	85.3	87	89.3	98.9	787.42	148.61	36	780	821	839	904	85.96	16.22	3.93	85.15	89.63	91.59	98.69
noCat_CRI10-B-R153-Map12	Z. tritici CRI10	CRI10	6971	49908	17	3	14	6	91.7	9.89	70.6	90.3	96.49	97.5	98.6	3564.86	3230.86	62	281	3488.5	6938	7138	51.14	46.35	0.89	4.03	50.04	99.53	102.4
noCat_CRI10-B-R45-Map15	Z. tritici CRI10	CRI10	829	47572	64	17	63	18	93	2.27	83.5	91.6	92.6	94.8	97.1	755.11	100.5	82	754	773	796	881	91.09	12.12	9.89	90.95	93.24	96.02	106.27
RIX-comp_CRI10-B-G108-Map18_reversed	Z. tritici CRI10	CRI10	4711	15029	12	1	11	1	93.22	4.77	79.1	93.8	94.37	94.8	96.9	1369.45	1486.2	85	317	952	1605	4701	29.07	31.55	1.8	6.73	20.21	34.07	99.79
RIX-comp_CRI10-B-G128-Map20_reversed	Z. tritici CRI10	CRI10	6705	561892	143	1	136	1	95.41	4.65	71.1	95	96.8	97.7	98.8	4131.56	2116.44	22	2798	5569	5586	6866	61.62	31.57	0.33	41.73	83.06	83.31	102.4
RIX-comp_CRI10-B-G179-Map20_reversed	Z. tritici CRI10	CRI10	5129	155189	34	1900-01-30	34	30	95.33	7.15	66.6	96.8	97.1	97.3	98.5	4714.53	1229.52	330	5104	5108.5	5115	5129	91.92	23.97	6.43	99.51	99.6	99.73	100
RIX-comp_CRI10-B-G203-Map16	Z. tritici CRI10	CRI10	6529	45663	19	1	17	2	94.22	5.06	76.3	93.17	95.7	96.4	100	2686.06	2590.12	63	248	1414	5571	6505	41.14	39.67	0.96	3.8	21.66	85.33	99.63
RIX-comp_CRI10-B-G225-Map3_reversed	Z. tritici CRI10	CRI10	8247	12854	5	1	5	1	94.36	1.51	92.5	94.1	94.1	94.4	96.7	2570.8	3485.27	29	480	505	3569	8271	31.17	42.26	0.35	5.82	6.12	43.28	100.29
RIX-comp_CRI10-B-G6-Map20_reversed	Z. tritici CRI10	CRI10	10770	51591	61	1	57	1	79.19	9.19	67.8	71.8	76	85.94	99.6	908.56	1793.7	22	115	319	786	11010	8.44	16.65	0.2	1.07	2.96	7.3	102.23
RIX-comp_CRI10-B-R255-Map3_reversed	Z. tritici CRI10	CRI10	3358	36013	28	4	19	6	70.49	12.24	56.18	64.92	67.4	71.38	98.4	1895.42	1337.69	42	123	2229	3306	3358	56.44	39.84	1.25	3.66	66.38	98.45	100
RIX-comp_CRI10-B-R3-Map20	Z. tritici CRI10	CRI10	12642	139274	54	3	47	3	93.18	3.71	72.8	92.57	94.4	94.9	95.8	2963.28	3705.09	23	364	1277	3749	12670	23.44	29.31	0.18	2.88	10.1	29.66	100.22
RIX-incomp_CRI10-B-G101-Map3_reversed	Z. tritici CRI10	CRI10	6143	17954	9	1	8	1	93.37	3.03	89.5	90.5	94.35	96.5	97.2	2244.25	2480.23	21	36	1742	5153	6146	36.53	40.37	0.34	0.59	28.36	83.88	100.05
RIX-incomp_CRI10-B-G154-Map5_reversed	Z. tritici CRI10	CRI10	6041	6043	2	1	2	1	83.6	15.41	72.7	72.7	83.6	94.5	94.5	3021.5	4240.52	23	23	3021.5	6020	6020	50.02	70.2	0.38	0.38	50.02	99.65	99.65
RIX-incomp_CRI10-B-G5-Map20	Z. tritici CRI10	CRI10	20610	198042	62	1	31	1	87.05	7.31	69.4	85.41	88.86	92.02	95.7	6388.52	5915.72	27	1297	4690	10948	19651	31	28.7	0.13	6.29	22.76	53.12	95.35
RLX-comp_CRI10-B-G197-Map13_reversed	Z. tritici CRI10	CRI10	6832	172485	64	11	51	15	88.5	11.79	55.6	84.7	94.3	95.4	97.1	3382.88	2772.26	36	611	3083	6797	6860	49.52	40.58	0.53	8.94	45.13	99.49	100.41
RLX-comp_CRI10-B-G212-Map7_reversed	Z. tritici CRI10	CRI10	6722	38689	24	5	19	5	75.32	17.37	55.2	58.44	68.1	96.6	97.7	2036.26	2896.01	22	71	310	6717	6719	30.29	43.08	0.33	1.06	4.61	99.93	99.96
RLX-comp_CRI10-B-G234-Map5_reversed	Z. tritici CRI10	CRI10	8464	58059	17	5	16	6	84.26	15.27	56.3	73.1	92.65	96.2	100	3628.69	3943.44	31	486	795.5	8462	8468	42.87	46.59	0.37	5.74	9.4	99.98	100.05
RLX-comp_CRI10-B-P32.6-Map3	Z. tritici CRI10	CRI10	7039	54168	23	5	19	6	74.72	12	58.5	66.5	72.1	81.2	98.2	2850.95	3099.49	46	132	1289	7039	7073	40.5	44.03	0.65	1.88	18.31	100	100.48
RLX-comp_CRI10-B-R16-Map20_reversed	Z. tritici CRI10	CRI10	9508	286018	59	15	47	20	95.01	2.53	86.5	94.58	95.9	96.5	97.9	6085.62	3641.2	27	2398	7528	9456	9512	64.01	38.3	0.28	25.22	79.18	99.45	100.04
RLX-incomp_CRI10-B-G15-Map20	Z. tritici CRI10	CRI10	15670	114413	52	1	46	1	86.69	14.41	55.9	83.1	94.24	95.6	97	2490.26	3525.39	23	93	403.5	5935	15666	15.89	22.5	0.15	0.59	2.57	37.87	99.97
RLX-incomp_CRI10-B-G20-Map20_reversed	Z. tritici CRI10	CRI10	6422	140445	69	11	63	12	89.67	10.09	59.9	87.3	94.21	95.5	100	2229.29	2541.17	34	261	970	5195	6497	34.71	39.57	0.53	4.06	15.1	80.89	101.17
RLX-incomp_CRI10-B-G222-Map11	Z. tritici CRI10	CRI10	8369	69611	25	2	18	4	84.28	13.04	57.1	79.2	89.23	95.1	97.2	3867.33	3330.03	110	630	3473.5	7689	8389	46.21	39.79	1.31	7.53	41.5	91.87	100.24
RLX-incomp_CRI10-B-G224-Map20_reversed	Z. tritici CRI10	CRI10	6983	83733	25	9	25	9	88.78	12.8	56.2	80	96.3	97	97.3	3349.32	3059.58	36	374	2521	6953	6974	47.96	43.81	0.52	5.36	36.1	99.57	99.87
RLX-incomp_CRI10-B-G235-Map10	Z. tritici CRI10	CRI10	8303	99520	22	6	17	9	95.4	2.58	89.3	95	96.1	96.4	100	5854.12	2981.06	23	3139	8251	8259	8296	70.51	35.9	0.28	37.81	99.37	99.47	99.92
RLX-incomp_CRI10-B-G71-Map9	Z. tritici CRI10	CRI10	3040	8971	14	2	14	2	93.56	5.87	79	95	95.9	96.8	97.7	640.79	1001.35	76	275	277	289	3015	21.08	32.94	2.5	9.05	9.11	9.51	99.18
RLX-incomp_CRI10-B-P24.13-Map7_reversed	Z. tritici CRI10	CRI10	6817	338190	88	29	70	33	94.67	1.6	85.9	93.9	95.2	95.7	96.9	4831.47	2277.02	34	2990	5809	6802	6830	70.87	33.4	0.5	43.86	85.21	99.78	100.19
RLX-incomp_CRI10-B-R11-Map20	Z. tritici CRI10	CRI10	6395	554673	107	75	96	81	95.52	2.56	75	94.8	95.95	96.9	100	5778.1	1592.98	32	6354	6356	6359	6512	90.35	24.91	0.5	99.36	99.39	99.44	101.83
RLX-incomp_CRI10-B-R151-Map3_reversed	Z. tritici CRI10	CRI10	3099	16375	13	4	12	5	85.62	10.69	67	81.2	91.3	94.1	97.2	1364.58	1527.86	26	36	376.5	3102	3111	44.03	49.3	0.84	1.16	12.15	100.1	100.39
RLX-incomp_CRI10-B-R152-Map3_reversed	Z. tritici CRI10	CRI10	4056	21738	11	4	11	4	81.87	11.67	62.3	71.6	84.4	93.2	97.7	1976.18	1882.51	45	103	2058	4052	4053	48.72	46.41	1.11	2.54	50.74	99.9	99.93
RLX-incomp_CRI10-B-R17-Map3_reversed	Z. tritici CRI10	CRI10	13050	48236	24	2	21	2	71.77	14.32	55.9	62.9	68.9	75.2	100	2296.95	4190.73	25	172	355	1006	13052	17.6	32.11	0.19	1.32	2.72	7.71	100.02
RLX-incomp_CRI10-B-R29-Map20_reversed	Z. tritici CRI10	CRI10	14032	562983	103	1900-01-17	67	23	93.52	2.72	80	92.18	94.3	95.4	99.2	8402.88	5053.5	73	4099	7763	13812	13984	59.88	36.01	0.52	29.21	55.32	98.43	99.66
RLX-incomp_CRI10-B-R31-Map20	Z. tritici CRI10	CRI10	6939	386408	107	34	92	38	92.75	9.28	56.3	94.4	95.6	96.3	98.6	4201.75	2783.04	22	1215	4863.5	6927	7120	60.55	40.11	0.32	17.51	70.09	99.83	102.61
RLX-incomp_CRI10-B-R403-Map4	Z. tritici CRI10	CRI10	3738	13893	8	1900-01-02	7	2	90.16	12.88	68.8	74.25	97.6	98.4	98.7	1984.71	1563.49	270	447	1447	3736	3737	53.1	41.83	7.22	11.96	38.71	99.95	99.97
RLX-incomp_CRI10-B-R423-Map3_reversed	Z. tritici CRI10	CRI10	1302	5749	8	3	8	3	93.74	7.92	80.3	95.9	98.1	98.5	98.8	718.62	563.78	49	242	659	1300	1302	55.19	43.3	3.76	18.59	50.61	99.85	100
RLX-incomp_CRI10-B-R98-Map5	Z. tritici CRI10	CRI10	5536	10973	6	1	5	1	95.04	2.74	90.3	95.1	96.3	96.5	97	2194.6	1956.89	399	1470	1602	1966	5536	39.64	35.35	7.21	26.55	28.94	35.51	100
RXX_CRI10-B-R380-Map3	Z. tritici CRI10	CRI10	1642	6759	17	2	16	2	87.01	9.11	79	79	82.25	98.17	98.7	422.69	485.31	55	224	269	273	1643	25.74	29.56	3.35	13.64	16.38	16.63	100.06
RXX-TRIM_CRI10-B-G361-Map7	Z. tritici CRI10	CRI10	901	5674	9	3	9	3	88.88	10.04	73.9	77.1	95.1	95.9	97.5	630.44	283.35	93	507	734	892	915	69.97	31.45	10.32	56.27	81.47	99	101.55
RXX-TRIM_CRI10-B-R315-Map3	Z. tritici CRI10	CRI10	541	6000	14	8	14	8	86.51	7.02	78.8	81.5	83.6	90.3	98.9	428.57	172.5	49	361	535	551	557	79.22	31.89	9.06	66.73	98.89	101.85	102.96
DHX-incomp_I93-B-G191-Map12	Z. tritici I93	I93	13728	304346	84	8	65	11	87.83	10.71	56.6	80	94.3	95.8	100	4682.52	5189.3	30	83	3059	8930	13854	34.11	37.8	0.22	0.6	22.28	65.05	100.92
DHX-incomp_I93-B-G66-Map3_reversed	Z. tritici I93	I93	4023	16702	30	1900-01-02	29	2	79.37	12.07	58.9	70.3	83.9	85.8	98.4	575.93	1112.52	21	130	138	282	4021	14.32	27.65	0.52	3.23	3.43	7.01	99.95
DHX-incomp_I93-B-R318-Map3	Z. tritici I93	I93	1714	8098	15	3	13	3	81.99	10.94	67.2	73.6	78	90.7	98.3	622.92	657.35	44	120	358	786	1714	36.34	38.35	2.57	7	20.89	45.86	100
DTX-comp_I93-B-G74-Map4	Z. tritici I93	I93	3569	35918	29	3	23	3	82.13	12.45	63.4	69.9	84.6	96.05	98.3	1561.65	1483.95	25	121	649	3080	3559	43.76	41.58	0.7	3.39	18.18	86.3	99.72
DTX-comp_I93-B-P8.32-Map8	Z. tritici I93	I93	2218	37450	25	14	20	16	83.08	10.55	70.5	73.5	79.91	96.9	97.8	1872.5	714.65	43	2155	2192	2215	2217	84.42	32.22	1.94	97.16	98.83	99.86	99.95
DTX-comp_I93-B-R165-Map8_reversed	Z. tritici I93	I93	2190	25385	31	5	27	6	82.24	10.06	68.2	74.1	78.2	94.8	98.1	940.19	862.34	28	89	720	1847	2265	42.93	39.38	1.28	4.06	32.88	84.34	103.42
DTX-comp_I93-B-R24-Map13_reversed	Z. tritici I93	I93	4538	53039	41	1900-01-07	37	8	81.86	11.42	57.7	77.6	82.6	91.2	96.9	1433.49	1958.03	33	98	159	3734	4765	31.59	43.15	0.73	2.16	3.5	82.28	105
DTX-comp_I93-B-R81-Map3_reversed	Z. tritici I93	I93	2977	30884	34	4	28	9	82.26	8.73	59.3	75.9	83.88	87.2	97	1103.18	1358.92	23	48	235	2980	3017	37.06	45.65	0.77	1.61	7.89	100.1	101.34
DTX-incomp_I93-B-G123-Map7	Z. tritici I93	I93	5473	148784	63	19	52	23	88.59	6.26	73.7	85.7	88.9	93.1	100	2861.5	2582.83	24	53	4549.5	5354	5430	52.28	47.19	0.44	0.97	83.13	97.83	99.21
DTX-incomp_I93-B-G142-Map4	Z. tritici I93	I93	6115	24730	9	1900-01-04	9	4	91	8.39	79.1	84.9	97.5	97.7	98.4	2747.78	3187.36	37	53	93	6103	6113	44.94	52.12	0.61	0.87	1.52	99.8	99.97
DTX-incomp_I93-B-G195-Map3_reversed	Z. tritici I93	I93	1357	1871	5	1900-01-01	5	1	89.46	6.86	81.4	86.4	86.4	95.1	98	374.2	533.06	48	48	204	258	1313	27.58	39.28	3.54	3.54	15.03	19.01	96.76
DTX-incomp_I93-B-G225-Map3_reversed	Z. tritici I93	I93	611	611	1	1	1	1	91.5	0	91.5	91.5	91.5	91.5	91.5	611	0	611	611	611	611	611	100	0	100	100	100	100	100
DTX-incomp_I93-B-G399-Map3_reversed	Z. tritici I93	I93	1757	7485	13	1	13	1	81.41	13.24	57.1	69.6	84.3	87	100	592.54	535.76	40	215	435	896	1757	33.72	30.49	2.28	12.24	24.76	51	100
DTX-incomp_I93-B-G72-Map7_reversed	Z. tritici I93	I93	3083	35968	55	2	55	2	76.88	10.02	68.5	70.7	72.2	79.4	99.9	653.96	705.53	31	217	411	711	3082	21.21	22.88	1.01	7.04	13.33	23.06	99.97
DTX-incomp_I93-B-P20.24-Map13	Z. tritici I93	I93	2356	35465	20	13	18	15	93.96	6.58	71.2	95.39	96.7	97.2	97.5	1970.28	871.53	33	2346	2347	2350	2357	83.63	36.99	1.4	99.58	99.62	99.75	100.04
DTX-incomp_I93-B-P4.15-Map7	Z. tritici I93	I93	5432	44420	15	1900-01-08	15	8	86.37	13.82	58.6	70.1	92.7	97.5	98.2	2961.33	2730.86	37	152	5410	5428	5453	54.52	50.27	0.68	2.8	99.59	99.93	100.39
DTX-incomp_I93-B-P41.7-Map3	Z. tritici I93	I93	7129	57960	25	5	24	5	91.01	7.34	70.5	90.2	93.62	96.6	98.2	2415	2937.3	28	65	346	6221	7129	33.88	41.2	0.39	0.91	4.85	87.26	100
DTX-incomp_I93-B-P52.41-Map3	Z. tritici I93	I93	5426	12535	4	2	4	2	87.97	17.67	61.5	96.2	96.25	97.9	97.9	3133.75	2698.5	195	1489	3457	5426	5426	57.75	49.73	3.59	27.44	63.71	100	100
DTX-incomp_I93-B-R124-Map9	Z. tritici I93	I93	5459	39922	24	4	22	4	86.25	9.21	69.7	79.7	84.75	95.8	98.4	1814.64	2153.93	27	78	420	4030	5394	33.24	39.46	0.49	1.43	7.69	73.82	98.81
DTX-incomp_I93-B-R125-Map20	Z. tritici I93	I93	5546	176448	66	17	47	27	90.09	7.73	69.52	84.4	91.95	96.7	97.4	3754.21	2359.67	28	772	5417	5461	5535	67.69	42.55	0.5	13.92	97.67	98.47	99.8
DTX-incomp_I93-B-R127-Map3	Z. tritici I93	I93	963	2359	4	1	4	1	95.47	4.59	88.7	96.6	97.4	98.4	98.4	589.75	309.63	301	371	548.5	961	961	61.24	32.15	31.26	38.53	56.96	99.79	99.79
DTX-incomp_I93-B-R134-Map9	Z. tritici I93	I93	3463	20333	12	2	11	2	88.98	12.01	66.7	76	95	97.7	98.2	1848.45	1185.29	99	674	2043	2979	3452	53.38	34.23	2.86	19.46	59	86.02	99.68
DTX-incomp_I93-B-R140-Map12	Z. tritici I93	I93	2940	45466	40	5	39	5	81.7	13.02	58	70.2	79.2	96.7	98.7	1165.79	999.2	37	152	1184	1738	2927	39.65	33.99	1.26	5.17	40.27	59.12	99.56
DTX-incomp_I93-B-R162-Map7	Z. tritici I93	I93	3420	25991	29	4	24	5	78.85	9.87	63.26	73.7	75.45	89.5	96.2	1082.96	1401.96	30	106	264.5	3022	3563	31.67	40.99	0.88	3.1	7.73	88.36	104.18
DTX-incomp_I93-B-R168-Map4_reversed	Z. tritici I93	I93	2197	9810	25	2	24	3	85.39	6.32	71.6	81.8	84.3	90.9	97.7	408.75	750.51	34	56	67	268	2216	18.6	34.16	1.55	2.55	3.05	12.2	100.86
DTX-incomp_I93-B-R171-Map3	Z. tritici I93	I93	1872	18214	18	5	16	6	78.48	10.79	66.3	70.4	75.95	81.9	98.2	1138.38	784.82	103	252	1504	1870	1872	60.81	41.92	5.5	13.46	80.34	99.89	100
DTX-incomp_I93-B-R174-Map4_reversed	Z. tritici I93	I93	1137	1713	6	1	6	1	91.55	6.37	82.1	87.9	92.05	97.5	97.7	285.5	441.35	30	43	50	403	1137	25.11	38.82	2.64	3.78	4.4	35.44	100
DTX-incomp_I93-B-R184-Map6	Z. tritici I93	I93	5366	19125	8	2	6	3	88.77	11.97	65.1	90.25	91.7	96.7	97.2	3187.5	2609.76	43	152	4039.5	5404	5447	59.4	48.64	0.8	2.83	75.28	100.71	101.51
DTX-incomp_I93-B-R194-Map8_reversed	Z. tritici I93	I93	4047	18086	20	1	17	3	87.67	9.23	71.2	83.4	88.6	95.43	96.7	1063.88	1506.25	25	86	203	1367	4056	26.29	37.22	0.62	2.13	5.02	33.78	100.22
DTX-incomp_I93-B-R195-Map3	Z. tritici I93	I93	869	7447	25	5	20	5	81.42	8.58	72.5	74.7	78.42	86.4	98.3	372.35	306.81	36	247	273	860	885	42.85	35.31	4.14	28.42	31.42	98.96	101.84
DTX-incomp_I93-B-R204-Map4	Z. tritici I93	I93	2327	27697	31	1900-01-07	28	8	81.23	9.08	67.6	74.3	81.5	89.5	98	989.18	934.65	42	124	619.5	2268	2335	42.51	40.17	1.8	5.33	26.62	97.46	100.34
DTX-incomp_I93-B-R217-Map3_reversed	Z. tritici I93	I93	1798	16344	18	1900-01-07	18	7	79.43	8.83	63.3	74	76.3	86.8	99.9	908	844.87	23	55	857.5	1786	1810	50.5	46.99	1.28	3.06	47.69	99.33	100.67
DTX-incomp_I93-B-R228-Map5	Z. tritici I93	I93	2324	11973	9	3	8	3	85.22	8.52	77.5	79	80.5	96.96	97.6	1496.62	1115.82	33	295	2208	2324	2513	64.4	48.01	1.42	12.69	95.01	100	108.13
DTX-incomp_I93-B-R239-Map8_reversed	Z. tritici I93	I93	2997	23541	28	1	27	1	84.21	12.43	59.3	72.2	83.3	96.3	98.8	871.89	940.67	28	124	384	1597	2977	29.09	31.39	0.93	4.14	12.81	53.29	99.33
DTX-incomp_I93-B-R277-Map3	Z. tritici I93	I93	2619	6207	17	2	17	2	88.78	5.14	83.3	86.2	86.8	91.2	100	365.12	850	21	40	50	96	2619	13.94	32.46	0.8	1.53	1.91	3.67	100
DTX-incomp_I93-B-R300-Map8	Z. tritici I93	I93	4008	21186	20	3	20	3	90.81	8.81	72.4	85.2	93.1	98.4	100	1059.3	1554.39	37	57	188	2524	4079	26.43	38.78	0.92	1.42	4.69	62.97	101.77
DTX-incomp_I93-B-R321-Map3	Z. tritici I93	I93	1086	6997	9	5	9	5	83.7	12.11	63.6	74.8	87	91.2	100	777.44	441.15	37	747	1067	1086	1096	71.59	40.62	3.41	68.78	98.25	100	100.92
DTX-incomp_I93-B-R355-Map3	Z. tritici I93	I93	1266	6596	19	1900-01-02	18	3	81.07	8.29	70.6	75.4	78.25	82	98.2	366.44	484.34	39	65	136.5	211	1302	28.95	38.26	3.08	5.13	10.78	16.67	102.84
DTX-incomp_I93-B-R356-Map3	Z. tritici I93	I93	2863	25157	27	1900-01-03	23	6	80.12	8.82	61.6	73.4	79.1	80.8	97.7	1093.78	1169.8	23	120	603	2748	2870	38.2	40.86	0.8	4.19	21.06	95.98	100.24
DTX-incomp_I93-B-R363-Map3	Z. tritici I93	I93	3373	11113	11	2	11	2	88.51	9.49	72.1	76.4	91.9	97	98.2	1010.27	1332.46	31	37	201	2049	3385	29.95	39.5	0.92	1.1	5.96	60.75	100.36
DTX-incomp_I93-B-R51-Map8	Z. tritici I93	I93	5400	30962	52	4	50	4	86.35	6.92	69.6	81.2	87.05	92.1	98.3	619.76	1534.28	21	59	88	153	5406	11.48	28.41	0.39	1.09	1.63	2.83	100.11
DTX-incomp_I93-B-R58-Map5	Z. tritici I93	I93	4361	19796	30	3	29	3	88.54	10.52	69.9	80.7	93.9	97.6	100	682.62	1393.02	27	41	50	324	4361	15.65	31.94	0.62	0.94	1.15	7.43	100
DTX-incomp_I93-B-R68-Map4_reversed	Z. tritici I93	I93	3145	28238	24	2	19	3	79.23	11.94	62.51	69.3	72.9	93.3	98.2	1486.21	1091.2	51	576	1499	2511	3156	47.26	34.7	1.62	18.31	47.66	79.84	100.35
DTX-incomp_I93-B-R96-Map3	Z. tritici I93	I93	4141	9132	10	2	10	2	85.21	8.32	76.5	78.3	82.8	90.6	98.2	913.2	1701.8	31	69	139	155	4141	22.05	41.1	0.75	1.67	3.36	3.74	100
DXX-MITE_I93-B-G232-Map4	Z. tritici I93	I93	452	6598	21	6	20	6	80.28	10.96	69.1	71.8	76.16	89.3	99.1	329.9	147.63	56	200	414	446	452	72.99	32.66	12.39	44.25	91.59	98.67	100
DXX-MITE_I93-B-G234-Map3	Z. tritici I93	I93	512	2832	13	4	13	4	84.45	7.33	79.5	79.5	80.3	84	98.4	217.85	198.75	85	86	89	490	512	42.55	38.82	16.6	16.8	17.38	95.7	100
DXX-MITE_I93-B-G247-Map3	Z. tritici I93	I93	495	2760	7	5	7	5	90.36	9.14	79.1	81.6	89.5	99.4	100	394.29	184.72	48	220	495	498	512	79.65	37.32	9.7	44.44	100	100.61	103.43
DXX-MITE_I93-B-G251-Map5	Z. tritici I93	I93	501	4293	17	7	17	7	87.62	9.9	71	82	87	99.2	99.6	252.53	226.74	34	44	72	483	498	50.41	45.26	6.79	8.78	14.37	96.41	99.4
DXX-MITE_I93-B-P17.4-Map5	Z. tritici I93	I93	496	2321	7	4	7	4	88.5	9.35	76.1	76.8	94.7	96	97.2	331.57	202.62	66	142	491	494	494	66.85	40.85	13.31	28.63	98.99	99.6	99.6
DXX-MITE_I93-B-P22.22-Map4	Z. tritici I93	I93	641	3628	12	3	11	4	87.66	8.09	76.8	80.6	86.3	96.7	98	329.82	293.37	68	69	100	642	659	51.45	45.77	10.61	10.76	15.6	100.16	102.81
DXX-MITE_I93-B-P27.17-Map4	Z. tritici I93	I93	716	4193	11	5	9	5	86.87	12.59	71.3	76.1	83	99.6	99.9	465.89	298.82	46	209	686	714	716	65.07	41.73	6.42	29.19	95.81	99.72	100
DXX-MITE_I93-B-P51.40-Map6	Z. tritici I93	I93	496	6026	31	6	29	7	85.17	6.97	75.6	80.9	82.5	93.7	98	207.79	174.36	63	83	110	387	499	41.89	35.15	12.7	16.73	22.18	78.02	100.6
DXX-MITE_I93-B-R126-Map11	Z. tritici I93	I93	574	6301	12	10	12	10	96.61	1.13	93.9	96.1	97	97.4	98.1	525.08	121.75	151	567	568	571	571	91.48	21.21	26.31	98.78	98.95	99.48	99.48
noCat_I93-B-G318-Map17	Z. tritici I93	I93	880	31959	42	18	42	18	96.09	2.82	88.6	93.4	97.15	98.5	99.2	760.93	185.71	28	762	825	863	899	86.47	21.1	3.18	86.59	93.75	98.07	102.16
noCat_I93-B-P5.0-Map11	Z. tritici I93	I93	807	33011	56	27	55	27	93.32	2.4	85.6	92.3	93.4	94.4	97.8	600.2	283.69	36	581	766	781	827	74.37	35.15	4.46	72	94.92	96.78	102.48
noCat_I93-B-R106-Map11	Z. tritici I93	I93	805	17465	29	10	29	10	93.95	2.59	83.8	93.5	94.2	95.5	98.7	602.24	291.74	66	500	759	782	900	74.81	36.24	8.2	62.11	94.29	97.14	111.8
noCat_I93-B-R149-Map12	Z. tritici I93	I93	860	84433	157	41	125	46	89.99	5.63	76.8	84.36	91	93.5	98.9	676.52	273.33	74	741	793	832	933	78.67	31.78	8.6	86.16	92.21	96.74	108.49
noCat_I93-B-R34-Map18	Z. tritici I93	I93	5488	35554	18	1900-01-01	16	1	93.71	6.76	70.2	94.9	96	96.6	97.2	2222.12	1649.12	148	901	1986	3669	5408	40.49	30.05	2.7	16.42	36.19	66.85	98.54
noCat_I93-B-R42-Map20	Z. tritici I93	I93	888	47127	64	20	62	21	91.68	2.05	83.63	90.8	92.1	92.8	95.8	760.11	199.3	36	761	805	864	927	85.6	22.44	4.05	85.7	90.65	97.3	104.39
noCat_I93-B-R87-Map11	Z. tritici I93	I93	7058	36401	16	1900-01-03	14	3	88.37	8.21	76.4	80.5	93.68	95.4	96.4	2600.07	3023.73	22	22	1183	6170	7114	36.84	42.84	0.31	0.31	16.76	87.42	100.79
noCat_I93-B-R99-Map20	Z. tritici I93	I93	886	12842	21	0	20	0	92.77	1.82	88.9	92	93.4	94	95.5	642.1	262.52	30	719	751	772	818	72.47	29.63	3.39	81.15	84.76	87.13	92.33
RIX-comp_I93-B-G119-Map20_reversed	Z. tritici I93	I93	5658	396183	117	49	114	51	96.17	2.16	82.6	96	96.8	97.2	99	3475.29	2222.63	32	1102	4318.5	5578	5601	61.42	39.28	0.57	19.48	76.33	98.59	98.99
RIX-comp_I93-B-R212-Map4	Z. tritici I93	I93	4587	19982	13	2	12	2	83.08	15.34	54.5	74.7	85.25	98.1	98.6	1665.17	1850.32	35	270	650	4151	4587	36.3	40.34	0.76	5.89	14.17	90.49	100
RIX-comp_I93-B-R223-Map3	Z. tritici I93	I93	3680	7362	2	2	2	2	96.75	2.33	95.1	95.1	96.75	98.4	98.4	3681	0	3681	3681	3681	3681	3681	100.03	0	100.03	100.03	100.03	100.03	100.03
RIX-comp_I93-B-R3-Map20	Z. tritici I93	I93	11064	138265	52	5	42	7	89.21	7.56	73.4	84.6	92.95	95.2	97.3	3292.76	4079.83	24	247	780	6799	11006	29.76	36.87	0.22	2.23	7.05	61.45	99.48
RIX-comp_I93-B-R89-Map15	Z. tritici I93	I93	11259	62252	38	1900-01-02	34	2	88.27	7.78	73	80.3	91.17	94.7	96.7	1830.94	2973.78	39	240	574.5	2399	11619	16.26	26.41	0.35	2.13	5.1	21.31	103.2
RIX-comp_I93-B-R90-Map9	Z. tritici I93	I93	8313	29530	21	1900-01-01	21	1	81.67	11.18	67.3	72.3	77.8	93.8	96.1	1406.19	2360.05	29	199	412	819	8288	16.92	28.39	0.35	2.39	4.96	9.85	99.7
RIX-comp_I93-B-R92-Map4	Z. tritici I93	I93	7435	16077	8	1	7	1	92.63	5.89	80.5	90.54	95.7	96	97.6	2296.71	2657.82	85	174	1086	4507	7267	30.89	35.75	1.14	2.34	14.61	60.62	97.74
RIX-incomp_I93-B-P39.9-Map3	Z. tritici I93	I93	798	12577	21	12	21	12	93.23	6.15	76.3	92.7	94.2	97.7	98.6	598.9	304.18	36	635	773	784	797	75.05	38.12	4.51	79.57	96.87	98.25	99.87
RLX-comp_I93-B-G174-Map8	Z. tritici I93	I93	6214	33039	11	4	11	4	91.81	8.59	78.6	82	92.6	99.8	99.9	3003.55	2959.93	39	80	2171	6022	6210	48.34	47.63	0.63	1.29	34.94	96.91	99.94
RLX-comp_I93-B-G175-Map11_reversed	Z. tritici I93	I93	8472	144072	32	11	26	14	92.38	8.6	56	92.85	95.5	96.6	98	5866.62	3401.78	187	1961	8377.5	8468	8505	69.25	40.15	2.21	23.15	98.88	99.95	100.39
RLX-comp_I93-B-P18.26-Map14	Z. tritici I93	I93	6837	377231	100	36	82	46	90.87	7.74	68.6	90.9	92.98	96.6	97.5	4600.49	2858.53	43	1201	6797.5	6821	6851	67.29	41.81	0.63	17.57	99.42	99.77	100.2
RLX-comp_I93-B-P40.8-Map3	Z. tritici I93	I93	6962	88032	31	8	28	10	87.14	12.34	55.2	76.59	94.85	96.4	98	3144	3097.19	32	296	1674	6958	6971	45.16	44.49	0.46	4.25	24.04	99.94	100.13
RLX-comp_I93-B-P49.38-Map3_reversed	Z. tritici I93	I93	6295	26964	20	4	19	4	81.27	14.43	55	76.6	81.5	93.5	96.7	1419.16	2593.43	29	67	73	286	6342	22.54	41.2	0.46	1.06	1.16	4.54	100.75
RLX-comp_I93-B-R18-Map8_reversed	Z. tritici I93	I93	6242	56629	46	3	36	4	75.91	13.47	57.6	66.25	69.56	90.9	98.6	1573.03	2053.66	32	78	610.5	2717	6245	25.2	32.9	0.51	1.25	9.78	43.53	100.05
RLX-comp_I93-B-R19-Map20_reversed	Z. tritici I93	I93	6934	569798	162	44	132	61	92.95	5.72	56	92.79	94.55	96.1	97.4	4318.16	2849.51	40	1097	5865.5	6927	7127	62.28	41.09	0.58	15.82	84.59	99.9	102.78
RLX-comp_I93-B-R5-Map20	Z. tritici I93	I93	6353	206059	67	20	59	24	88.97	13.19	55.2	92.71	94.4	95.4	100	3492.61	2736.88	29	282	3510	6294	6479	54.98	43.08	0.46	4.44	55.25	99.07	101.98
RLX-incomp_I93-B-G11-Map20	Z. tritici I93	I93	13666	64600	38	1	30	1	84.49	13.06	56.9	70	92.35	94.6	96	2153.5	3052.74	29	293	869.5	3042	13345	15.76	22.34	0.21	2.14	6.36	22.26	97.65
RLX-incomp_I93-B-G156-Map20	Z. tritici I93	I93	14038	348827	81	6	58	11	88.38	11.65	56.6	90.9	93.5	94.6	95.8	6014.38	5284.96	32	1118	4790.5	11900	14249	42.84	37.65	0.23	7.96	34.13	84.77	101.5
RLX-incomp_I93-B-G164-Map4_reversed	Z. tritici I93	I93	7487	134822	43	11	41	11	94.14	5.69	73	92.8	96.2	97.7	100	3292.02	3117.91	29	232	3586	7118	7666	43.97	41.64	0.39	3.1	47.9	95.07	102.39
RLX-incomp_I93-B-G171-Map6_reversed	Z. tritici I93	I93	7959	145658	63	1900-01-10	53	13	72.84	10.49	56.9	67.5	69.7	76.2	97.5	2748.26	3305.25	31	280	1064	7375	8251	34.53	41.53	0.39	3.52	13.37	92.66	103.67
RLX-incomp_I93-B-G172-Map3_reversed	Z. tritici I93	I93	8305	34609	22	3	21	3	93.61	4.78	81.5	92.1	94.41	97	98.2	1648.05	3139.52	31	35	227	270	8306	19.84	37.8	0.37	0.42	2.73	3.25	100.01
RLX-incomp_I93-B-G182-Map18_reversed	Z. tritici I93	I93	9619	217240	56	1900-01-11	44	15	91.42	6.78	72.7	87.9	95.1	95.94	97.1	4937.27	3943.46	87	492	5123	9473	9533	51.33	41	0.9	5.11	53.26	98.48	99.11
RLX-incomp_I93-B-G377-Map5	Z. tritici I93	I93	1760	14051	17	1	16	1	91.42	3.29	85.8	89.6	90.2	95.2	98.5	878.81	396.53	22	925	943	943	1759	49.93	22.53	1.25	52.56	53.58	53.58	99.94
RLX-incomp_I93-B-G99-Map8	Z. tritici I93	I93	5820	22383	32	1	31	2	90.29	12.24	56.5	89.5	95.3	97.1	98.2	722.03	1547.36	30	67	275	281	5872	12.41	26.59	0.52	1.15	4.73	4.83	100.89
RLX-incomp_I93-B-P25.19-Map13	Z. tritici I93	I93	6816	476856	119	51	100	62	94.56	3.9	65.6	93.5	96.15	96.7	97.5	4775.17	2922.77	24	478	6791.5	6804	6979	70.06	42.88	0.35	7.01	99.64	99.82	102.39
RLX-incomp_I93-B-P9.31-Map3_reversed	Z. tritici I93	I93	5046	17329	13	3	11	3	82.83	10.33	68.8	73.9	78.3	93.5	98.4	1575.36	2271.68	28	33	100	5037	5046	31.22	45.02	0.55	0.65	1.98	99.82	100
RLX-incomp_I93-B-R109-Map10	Z. tritici I93	I93	13893	32768	19	1900-01-01	16	1	75.78	16.68	56.4	62.02	68.25	95.9	100	2048	3981.91	40	67	126	2385	13886	14.74	28.66	0.29	0.48	0.91	17.17	99.95
RLX-incomp_I93-B-R11-Map20_reversed	Z. tritici I93	I93	6359	517399	119	66	107	75	93.19	7.76	68.5	95.8	96.3	96.6	97.5	4894.92	2452.49	31	3635	6356	6358	6421	76.98	38.57	0.49	57.16	99.95	99.98	100.97
RLX-incomp_I93-B-R123-Map5	Z. tritici I93	I93	2762	5642	7	1	7	1	90.33	6.38	81	85.4	89.1	96.6	96.8	806	1080.16	24	25	50	1630	2759	29.18	39.11	0.87	0.91	1.81	59.02	99.89
RLX-incomp_I93-B-R138-Map16_reversed	Z. tritici I93	I93	6794	47705	24	2	21	3	91.12	10.57	59.5	90.8	96.2	97.1	99	2272.05	2349.66	30	228	1589	2785	6795	33.44	34.58	0.44	3.36	23.39	40.99	100.01
RLX-incomp_I93-B-R14-Map14_reversed	Z. tritici I93	I93	8271	71286	12	7	11	8	94.07	7.55	71.4	95.4	96.2	96.7	97.6	6480.55	3255.45	124	4435	8250	8253	8432	78.35	39.36	1.5	53.62	99.75	99.78	101.95
RLX-incomp_I93-B-R159-Map3	Z. tritici I93	I93	3226	16653	15	2	14	2	70.77	11.78	58.1	66.4	67.7	70.2	100	1189.5	1210.07	104	470	629	2747	3226	36.87	37.51	3.22	14.57	19.5	85.15	100
RLX-incomp_I93-B-R231-Map4_reversed	Z. tritici I93	I93	6746	78745	43	4	33	8	81.8	8.94	63.06	74.04	84.39	87.9	96.1	2388.15	2931.67	23	37	397	6358	6838	35.4	43.46	0.34	0.55	5.88	94.25	101.36
RLX-incomp_I93-B-R242-Map4	Z. tritici I93	I93	6421	55962	63	1900-01-02	46	3	77.64	9.21	68.57	71	72.64	84.9	98.7	1216.57	1817.34	25	60	478.5	1213	6592	18.95	28.3	0.39	0.93	7.45	18.89	102.66
RLX-incomp_I93-B-R286-Map3	Z. tritici I93	I93	4172	10066	13	2	13	2	90.28	5.93	79	88.1	89.4	94.2	97.7	774.31	1522.53	24	38	83	439	4193	18.56	36.49	0.58	0.91	1.99	10.52	100.5
RLX-incomp_I93-B-R306-Map3_reversed	Z. tritici I93	I93	3188	10811	8	2	7	3	90.43	7.79	77.6	85.42	93.2	96.5	100	1544.43	1536.92	161	363	366	3188	3188	48.45	48.21	5.05	11.39	11.48	100	100
RLX-incomp_I93-B-R373-Map4_reversed	Z. tritici I93	I93	888	4665	12	3	12	3	90.36	8.28	75.6	83	93.2	98.4	99.4	388.75	306	161	167	174	856	873	43.78	34.46	18.13	18.81	19.59	96.4	98.31
RLX-incomp_I93-B-R374-Map4_reversed	Z. tritici I93	I93	3582	15953	12	2	11	3	86.81	10.67	67.4	78.2	87.4	98.6	99.4	1450.27	1479.69	46	229	726	3500	3581	40.49	41.31	1.28	6.39	20.27	97.71	99.97
RLX-incomp_I93-B-R60-Map20	Z. tritici I93	I93	8444	93918	53	5	42	5	86.58	9.08	59.1	81.5	90.15	92.28	100	2272.31	3275.67	26	66	304.5	3916	9616	26.91	38.79	0.31	0.78	3.61	46.38	113.88
RXX-LARD_I93-B-G192-Map3	Z. tritici I93	I93	14777	43276	53	1900-01-02	52	2	84.76	7.32	71.2	78.6	83.3	89.2	100	842.13	3071.92	23	48	76.5	108	15045	5.7	20.79	0.16	0.32	0.52	0.73	101.81
RXX-LARD_I93-B-G45-Map3	Z. tritici I93	I93	3593	27617	47	2	36	4	93.94	2.55	83.3	93.34	94.5	94.69	97.2	768	1264.66	24	36	39	1545	3593	21.37	35.2	0.67	1	1.09	43	100
RXX-TRIM_I93-B-G248-Map3	Z. tritici I93	I93	637	1938	4	1900-01-02	4	2	95.75	3.87	90.3	95.8	96.85	99	99	484.5	244.33	120	570	597	624	624	76.06	38.36	18.84	89.48	93.72	97.96	97.96
RXX-TRIM_I93-B-G250-Map3	Z. tritici I93	I93	701	3776	18	2	18	2	91.31	4.73	80.1	89.5	92	94.1	97.5	209.78	206.08	46	50	100.5	331	700	29.93	29.4	6.56	7.13	14.34	47.22	99.86
RXX-TRIM_I93-B-G311-Map12	Z. tritici I93	I93	828	7366	25	1900-01-04	24	4	93.94	8.53	65.9	93.2	96.8	99.5	100	325.79	319.83	27	70	108	675	821	39.35	38.63	3.26	8.45	13.04	81.52	99.15
RXX-TRIM_I93-B-R13-Map5	Z. tritici I93	I93	734	4643	21	2	20	2	92.83	4.12	82.5	90.67	93.05	96.7	97.8	232.15	244.07	21	50	100.5	417	760	31.63	33.25	2.86	6.81	13.69	56.81	103.54
RXX-TRIM_I93-B-R169-Map3	Z. tritici I93	I93	504	588	2	0	2	0	96.6	0	96.6	96.6	96.6	96.6	96.6	294	172.53	172	172	294	416	416	58.33	34.23	34.13	34.13	58.33	82.54	82.54
RXX-TRIM_I93-B-R170-Map3	Z. tritici I93	I93	560	4027	9	7	8	7	90.81	7.3	78.2	86	92.68	97	97.8	507.88	131.35	184	546	551.5	561	575	90.69	23.46	32.86	97.5	98.48	100.18	102.68
DHX-incomp_IR01_48b-B-G142-Map10	Z. tritici IR01_48b	IR01_48b	9525	53814	12	4	11	4	94.19	3.6	86.4	90.9	95.4	97	97.7	4892.18	4340.31	28	39	5389	9689	9707	51.36	45.57	0.29	0.41	56.58	101.72	101.91
DHX-incomp_IR01_48b-B-G160-Map3	Z. tritici IR01_48b	IR01_48b	8463	31092	34	2	33	2	84.02	10.13	61.7	76.7	86	91.7	98.5	942.18	2287.24	30	50	112	338	8502	11.13	27.03	0.35	0.59	1.32	3.99	100.46
DHX-incomp_IR01_48b-B-G206-Map18	Z. tritici IR01_48b	IR01_48b	13736	224897	39	7	32	10	95.14	5.62	65.8	95.9	96.33	96.8	98.4	7028.09	5647.85	45	1944	6977.5	13685	13774	51.17	41.12	0.33	14.15	50.8	99.63	100.28
DHX-incomp_IR01_48b-B-P9.23-Map7	Z. tritici IR01_48b	IR01_48b	13694	96566	12	7	12	7	92.43	8.41	75	95.4	97	97.3	98.3	8047.17	6965.57	60	86	13675.5	13685	13691	58.76	50.87	0.44	0.63	99.86	99.93	99.98
DHX-incomp_IR01_48b-B-R191-Map3_reversed	Z. tritici IR01_48b	IR01_48b	5010	15442	7	3	7	3	85.9	14.62	62.3	73.9	93.6	98.2	98.4	2206	2652.96	21	78	125	5052	5100	44.03	52.95	0.42	1.56	2.5	100.84	101.8
DHX-incomp_IR01_48b-B-R252-Map4	Z. tritici IR01_48b	IR01_48b	3703	10843	15	2	15	2	86.96	9.4	68.7	80.4	88.4	95.7	98.2	722.87	1224.29	110	130	136	616	3703	19.52	33.06	2.97	3.51	3.67	16.64	100
DHX-incomp_IR01_48b-B-R303-Map6_reversed	Z. tritici IR01_48b	IR01_48b	8464	48145	35	4	32	5	80.71	10.79	62.1	72.5	83.55	91.35	97.2	1504.53	3062.58	26	59	167.5	744	8559	17.78	36.18	0.31	0.7	1.98	8.79	101.12
DHX-incomp_IR01_48b-B-R345-Map3_reversed	Z. tritici IR01_48b	IR01_48b	7291	31850	19	4	15	4	79.59	9.9	66.1	70.9	77.3	89.5	96.3	2123.33	3239.23	37	73	287	7205	7348	29.12	44.43	0.51	1	3.94	98.82	100.78
DTX-comp_IR01_48b-B-G386-Map3_reversed	Z. tritici IR01_48b	IR01_48b	2207	13446	9	6	8	6	82.85	10.62	71.3	78.3	79.05	96.2	100	1680.75	968.66	30	2197	2200	2207	2211	76.16	43.89	1.36	99.55	99.68	100	100.18
DTX-comp_IR01_48b-B-G99-Map3	Z. tritici IR01_48b	IR01_48b	4629	65058	31	3	29	5	80.72	9.99	68.6	72.2	78.43	86.2	98.3	2243.38	1897.72	33	214	1966	4348	4627	48.46	41	0.71	4.62	42.47	93.93	99.96
DTX-comp_IR01_48b-B-P23.10-Map3_reversed	Z. tritici IR01_48b	IR01_48b	2208	13565	13	3	10	5	88.22	9.35	72.2	83.04	89.75	96.2	97.8	1356.5	944.56	25	233	1685.5	2199	2214	61.44	42.78	1.13	10.55	76.34	99.59	100.27
DTX-comp_IR01_48b-B-P27.7-Map3	Z. tritici IR01_48b	IR01_48b	3277	30644	29	6	26	6	81.91	8.52	65.8	77.8	79.4	85.7	99.3	1178.62	1353.69	29	127	634	3254	3506	35.97	41.31	0.88	3.88	19.35	99.3	106.99
DTX-comp_IR01_48b-B-R118-Map4_reversed	Z. tritici IR01_48b	IR01_48b	2202	13203	11	3	9	4	87.42	9.72	77.14	78.58	83.1	97.3	98.5	1467	934.74	78	504	1950	2201	2206	66.62	42.45	3.54	22.89	88.56	99.95	100.18
DTX-comp_IR01_48b-B-R138-Map5_reversed	Z. tritici IR01_48b	IR01_48b	2209	11012	6	5	6	5	96.37	0.76	95.1	95.8	96.7	96.9	97	1835.33	870.57	59	2145	2193.5	2206	2215	83.08	39.41	2.67	97.1	99.3	99.86	100.27
DTX-comp_IR01_48b-B-R155-Map7_reversed	Z. tritici IR01_48b	IR01_48b	2213	20136	15	1900-01-06	13	7	87.72	9.12	70.5	80.6	85.8	97.2	97.5	1548.92	812.86	243	688	2176	2209	2216	69.99	36.73	10.98	31.09	98.33	99.82	100.14
DTX-comp_IR01_48b-B-R66-Map5	Z. tritici IR01_48b	IR01_48b	2178	13687	15	5	13	6	83.32	8.85	71	75.9	82.6	92.3	96.1	1052.85	1076.96	43	68	209	2165	2193	48.34	49.45	1.97	3.12	9.6	99.4	100.69
DTX-comp_IR01_48b-B-R68-Map6_reversed	Z. tritici IR01_48b	IR01_48b	4530	39643	18	4	16	4	82.77	9.92	67.8	77.32	79.97	94.7	97.1	2477.69	1829.81	57	504	3062	4448	4532	54.7	40.39	1.26	11.13	67.59	98.19	100.04
DTX-comp_IR01_48b-B-R78-Map6	Z. tritici IR01_48b	IR01_48b	2975	27600	29	6	26	7	83.06	9.85	59.8	76	85.4	87.2	98.1	1061.54	1363.47	23	48	132	2971	3145	35.68	45.83	0.77	1.61	4.44	99.87	105.71
DTX-incomp_IR01_48b-B-G134-Map8	Z. tritici IR01_48b	IR01_48b	5363	34278	15	5	13	5	91.82	4.82	83.4	88.2	91.3	95.1	98.3	2636.77	2510.78	28	49	2025	5356	5409	49.17	46.82	0.52	0.91	37.76	99.87	100.86
DTX-incomp_IR01_48b-B-G285-Map3	Z. tritici IR01_48b	IR01_48b	871	5565	19	3	17	3	85.63	9.69	73.6	74.81	86.1	93.8	99	327.35	294.9	47	126	261	363	877	37.58	33.86	5.4	14.47	29.97	41.68	100.69
DTX-incomp_IR01_48b-B-G34-Map3	Z. tritici IR01_48b	IR01_48b	2878	9404	5	3	5	3	88.4	13.52	68.3	80.4	97.7	97.8	97.8	1880.8	1376.34	115	661	2872	2878	2878	65.35	47.82	4	22.97	99.79	100	100
DTX-incomp_IR01_48b-B-G346-Map4	Z. tritici IR01_48b	IR01_48b	1997	23201	26	4	25	4	73.36	10.53	56.9	67.3	68.4	77	97.2	928.04	678.12	44	313	738	1593	1995	46.47	33.96	2.2	15.67	36.96	79.77	99.9
DTX-incomp_IR01_48b-B-G363-Map3	Z. tritici IR01_48b	IR01_48b	1980	12821	81	1900-01-02	80	3	89.02	11.32	65.3	78.6	91.4	100	100	177.53	389.98	23	43	50	160	1986	8.97	19.7	1.16	2.17	2.53	8.08	100.3
DTX-incomp_IR01_48b-B-G387-Map4_reversed	Z. tritici IR01_48b	IR01_48b	2482	20160	16	7	16	7	86.78	9.56	71.9	77.4	91.05	95.3	100	1260	1189.44	44	52	1246	2457	2480	50.77	47.92	1.77	2.1	50.2	98.99	99.92
DTX-incomp_IR01_48b-B-G40-Map3	Z. tritici IR01_48b	IR01_48b	2876	12361	11	4	10	4	84.31	10.31	70	76.2	83	97.5	98.2	1236.1	1418.25	47	71	242	2876	2903	42.98	49.31	1.63	2.47	8.41	100	100.94
DTX-incomp_IR01_48b-B-G45-Map3_reversed	Z. tritici IR01_48b	IR01_48b	2944	18025	13	4	12	5	85.24	10.77	66	76.1	87.65	96.3	98.4	1502.08	1439.84	43	98	1529	2943	2944	51.02	48.91	1.46	3.33	51.94	99.97	100
DTX-incomp_IR01_48b-B-G74-Map3_reversed	Z. tritici IR01_48b	IR01_48b	3350	31092	21	4	20	4	74.95	11.57	57.6	69.6	71.1	82.7	98.7	1554.6	1340.06	30	328	1338.5	3306	3641	46.41	40	0.9	9.79	39.96	98.69	108.69
DTX-incomp_IR01_48b-B-G81-Map3	Z. tritici IR01_48b	IR01_48b	3767	13206	19	3	19	3	86.02	7.24	71.8	80.7	86	88.2	98.2	695.05	1378.41	34	57	57	208	3781	18.45	36.59	0.9	1.51	1.51	5.52	100.37
DTX-incomp_IR01_48b-B-G96-Map4	Z. tritici IR01_48b	IR01_48b	4134	37480	36	1900-01-05	35	6	78.71	8.74	61.5	72.5	76.6	85.4	98	1070.86	1605.84	38	107	178	1283	4211	25.9	38.84	0.92	2.59	4.31	31.04	101.86
DTX-incomp_IR01_48b-B-G97-Map4	Z. tritici IR01_48b	IR01_48b	4172	48704	48	2	35	2	81.1	6.98	71.3	77.3	79.5	81.92	98.9	1393.51	1708.23	24	119	164	3782	4170	33.4	40.95	0.58	2.85	3.93	90.65	99.95
DTX-incomp_IR01_48b-B-P26.0-Map4	Z. tritici IR01_48b	IR01_48b	5356	22449	12	4	12	4	88.06	7.63	76.5	82.1	86.4	97.2	98	1870.75	2578.01	31	45	134	5338	5391	34.93	48.13	0.58	0.84	2.5	99.66	100.65
DTX-incomp_IR01_48b-B-P35.29-Map3	Z. tritici IR01_48b	IR01_48b	6949	21744	17	2	14	3	86.39	9.15	64.2	84.4	84.4	94.4	100	1553.14	2931.94	26	64	71	204	6972	22.35	42.19	0.37	0.92	1.02	2.94	100.33
DTX-incomp_IR01_48b-B-R131-Map3	Z. tritici IR01_48b	IR01_48b	1854	6215	6	1900-01-03	6	3	84.3	12.51	67.9	73.6	83.95	96.4	100	1035.83	898.37	53	249	1102.5	1854	1854	55.87	48.46	2.86	13.43	59.47	100	100
DTX-incomp_IR01_48b-B-R142-Map6	Z. tritici IR01_48b	IR01_48b	5468	29854	15	3	15	3	84.54	12.54	61.1	73.9	83.4	97.1	100	1990.27	2166.01	33	110	1282	3858	5539	36.4	39.61	0.6	2.01	23.45	70.56	101.3
DTX-incomp_IR01_48b-B-R146-Map3_reversed	Z. tritici IR01_48b	IR01_48b	2207	16717	33	5	33	5	83.89	6.91	70.8	79.4	82.4	87.7	100	506.58	830.36	38	58	67	189	2207	22.95	37.62	1.72	2.63	3.04	8.56	100
DTX-incomp_IR01_48b-B-R15-Map12	Z. tritici IR01_48b	IR01_48b	5491	42552	22	4	21	5	85.42	10.49	68.6	76.9	87.8	95.8	97.2	2026.29	2350.65	29	79	239	5114	5621	36.9	42.81	0.53	1.44	4.35	93.13	102.37
DTX-incomp_IR01_48b-B-R153-Map4	Z. tritici IR01_48b	IR01_48b	3161	9850	14	1900-01-02	14	2	95.69	2.85	88.7	94.7	96.9	97.6	98.1	703.57	1270.68	35	38	41	309	3166	22.26	40.2	1.11	1.2	1.3	9.78	100.16
DTX-incomp_IR01_48b-B-R16-Map4	Z. tritici IR01_48b	IR01_48b	6981	23864	23	3	23	3	84.07	10.58	70.1	75.2	81	96.5	98.4	1037.57	2311.35	29	62	129	363	6967	14.86	33.11	0.42	0.89	1.85	5.2	99.8
DTX-incomp_IR01_48b-B-R160-Map7	Z. tritici IR01_48b	IR01_48b	2908	47470	39	6	36	8	81.58	9.38	66.9	73.8	80.95	91.2	96.7	1318.61	1122.76	32	190	1214.5	2589	2902	45.34	38.61	1.1	6.53	41.76	89.03	99.79
DTX-incomp_IR01_48b-B-R167-Map4_reversed	Z. tritici IR01_48b	IR01_48b	4050	40730	36	7	33	8	84.87	8.16	72.6	78.9	82.5	91.1	100	1234.24	1649.56	35	118	340	2220	4111	30.48	40.73	0.86	2.91	8.4	54.81	101.51
DTX-incomp_IR01_48b-B-R168-Map7	Z. tritici IR01_48b	IR01_48b	2943	32419	20	5	18	6	87.93	8.62	73.8	79.4	89.15	96.5	97.4	1801.06	1120.18	88	701	2188	2889	2938	61.2	38.06	2.99	23.82	74.35	98.17	99.83
DTX-incomp_IR01_48b-B-R176-Map3	Z. tritici IR01_48b	IR01_48b	1992	12463	11	4	11	4	83.53	9.59	70.8	75	84	93.3	100	1133	928.66	30	136	1782	1992	2031	56.88	46.62	1.51	6.83	89.46	100	101.96
DTX-incomp_IR01_48b-B-R194-Map5	Z. tritici IR01_48b	IR01_48b	3701	41009	32	8	30	8	85.31	8.5	71	80.2	84.65	92.9	100	1367.07	1644.61	28	69	198	3533	3768	36.94	44.44	0.76	1.86	5.35	95.46	101.81
DTX-incomp_IR01_48b-B-R20-Map5	Z. tritici IR01_48b	IR01_48b	1645	6585	5	3	5	3	97.38	0.33	97	97.1	97.5	97.5	97.8	1317	500.39	513	1137	1645	1645	1645	80.06	30.42	31.19	69.12	100	100	100
DTX-incomp_IR01_48b-B-R224-Map4	Z. tritici IR01_48b	IR01_48b	5399	17373	9	3	8	3	87.66	10.87	71.7	82.51	91.9	96.9	97.5	2171.62	2665.15	32	157	474	5378	5406	40.22	49.36	0.59	2.91	8.78	99.61	100.13
DTX-incomp_IR01_48b-B-R261-Map3_reversed	Z. tritici IR01_48b	IR01_48b	565	3940	8	5	8	5	80.95	11.25	71.2	72.8	77.95	97.2	100	492.5	97.4	351	436	555	565	567	87.17	17.24	62.12	77.17	98.23	100	100.35
DTX-incomp_IR01_48b-B-R290-Map4	Z. tritici IR01_48b	IR01_48b	4002	14003	18	2	18	2	78.63	11.2	61.3	71.8	75.3	80.6	97.5	777.94	1399.51	31	119	170	214	4013	19.44	34.97	0.77	2.97	4.25	5.35	100.27
DTX-incomp_IR01_48b-B-R300-Map3_reversed	Z. tritici IR01_48b	IR01_48b	693	2714	4	4	4	4	91.72	6.67	82	93.2	93.95	97	97	678.5	16.78	659	670	681	693	693	97.91	2.42	95.09	96.68	98.27	100	100
DTX-incomp_IR01_48b-B-R50-Map3_reversed	Z. tritici IR01_48b	IR01_48b	1306	3931	3	3	3	3	97.23	0.75	96.5	96.5	97.2	98	98	1310.33	7.51	1306	1306	1306	1319	1319	100.33	0.57	100	100	100	101	101
DTX-incomp_IR01_48b-B-R55-Map4	Z. tritici IR01_48b	IR01_48b	1526	20178	35	3	33	3	76.58	9.4	69.2	70.5	71.9	81.5	99.8	611.45	409.55	43	210	603	786	1525	40.07	26.84	2.82	13.76	39.52	51.51	99.93
DTX-incomp_IR01_48b-B-R69-Map4	Z. tritici IR01_48b	IR01_48b	1843	5866	6	2	6	2	88.27	15.25	65.3	72.3	97.6	97.9	98.9	977.67	817.93	26	300	927.5	1842	1843	53.05	44.38	1.41	16.28	50.33	99.95	100
DTX-incomp_IR01_48b-B-R72-Map13	Z. tritici IR01_48b	IR01_48b	5460	72801	38	4	32	5	88.99	10.21	68.83	82.8	93.1	97.3	100	2275.03	2142.07	29	257	1636	4833	5483	41.67	39.23	0.53	4.71	29.96	88.52	100.42
DTX-incomp_IR01_48b-B-R83-Map20	Z. tritici IR01_48b	IR01_48b	5425	127807	41	17	39	18	91.02	8.46	56	89	93.1	96.7	100	3277.1	2402.49	27	107	4508	5378	5465	60.41	44.29	0.5	1.97	83.1	99.13	100.74
DTX-incomp_IR01_48b-B-R89-Map3	Z. tritici IR01_48b	IR01_48b	1640	7676	7	3	6	4	85.48	12.87	71.2	72.2	87.39	97.3	97.4	1279.33	546.01	572	577	1623.5	1640	1640	78.01	33.29	34.88	35.18	98.99	100	100
DXX-MITE_IR01_48b-B-G222-Map4	Z. tritici IR01_48b	IR01_48b	352	3432	12	4	12	4	82.33	13.54	69.6	71.9	75.25	100	100	286	91.76	133	322	324.5	350	351	81.25	26.07	37.78	91.48	92.19	99.43	99.72
DXX-MITE_IR01_48b-B-G227-Map3	Z. tritici IR01_48b	IR01_48b	412	7258	20	1900-01-14	20	14	81.1	9.37	71	73.4	79	88.6	98.5	362.9	122.09	49	399	412	423	447	88.08	29.63	11.89	96.84	100	102.67	108.5
DXX-MITE_IR01_48b-B-G244-Map4	Z. tritici IR01_48b	IR01_48b	493	5731	27	6	26	7	86.8	6.71	77.9	82.2	84.9	90	98.6	220.42	184.47	38	101	113.5	488	512	44.71	37.42	7.71	20.49	23.02	98.99	103.85
DXX-MITE_IR01_48b-B-G260-Map3	Z. tritici IR01_48b	IR01_48b	627	2181	7	3	7	3	90.8	9.51	77.8	78.6	96.3	98.4	99.7	311.57	303.96	62	69	71	627	656	49.69	48.48	9.89	11	11.32	100	104.63
DXX-MITE_IR01_48b-B-P18.14-Map4	Z. tritici IR01_48b	IR01_48b	358	3660	13	10	13	10	93.95	7.39	79.7	89.1	96.9	99.2	100	281.54	135.82	38	342	354	355	370	78.64	37.94	10.61	95.53	98.88	99.16	103.35
DYX-incomp_IR01_48b-B-P0.28-Map3	Z. tritici IR01_48b	IR01_48b	4414	26932	10	5	10	5	87.62	10.21	67.9	78.6	89.45	97.3	99.4	2693.2	1999.79	65	259	3706.5	4412	4430	61.01	45.31	1.47	5.87	83.97	99.95	100.36
noCat_IR01_48b-B-G104-Map20	Z. tritici IR01_48b	IR01_48b	4698	31844	28	1	26	1	87.34	8.31	75.9	78	90.8	94.7	97.4	1224.77	1641.21	78	81	385	1412	4633	26.07	34.93	1.66	1.72	8.19	30.06	98.62
noCat_IR01_48b-B-G251-Map20	Z. tritici IR01_48b	IR01_48b	579	8030	17	12	17	12	95.51	1.53	93.8	94.4	95	96.7	98.5	472.35	199.99	40	540	567	570	572	81.58	34.54	6.91	93.26	97.93	98.45	98.79
noCat_IR01_48b-B-R70-Map15	Z. tritici IR01_48b	IR01_48b	852	55964	73	12	73	12	91.04	2.93	84.8	89.5	91.2	92.5	96.5	766.63	70.68	580	745	776	806	992	89.98	8.3	68.08	87.44	91.08	94.6	116.43
noCat_IR01_48b-B-R98-Map20	Z. tritici IR01_48b	IR01_48b	11805	99851	41	2	37	2	89.57	6.8	72.9	83.1	92.11	95.8	98.3	2700	3968.66	34	61	414	4363	11677	22.87	33.62	0.29	0.52	3.51	36.96	98.92
RIX-comp_IR01_48b-B-G148-Map20_reversed	Z. tritici IR01_48b	IR01_48b	5648	225226	59	28	59	28	96.54	1.12	90.3	96.3	96.8	97.1	98.1	3817.39	2058.69	31	1870	5115	5582	5603	67.59	36.45	0.55	33.11	90.56	98.83	99.2
RIX-comp_IR01_48b-B-R3-Map20	Z. tritici IR01_48b	IR01_48b	18661	399099	117	1	92	4	91.1	6.98	67.1	92.1	93.7	95.1	97.7	4339.03	4836.67	48	373	2064.5	7796	18470	23.25	25.92	0.26	2	11.06	41.78	98.98
RLX-comp_IR01_48b-B-G147-Map20	Z. tritici IR01_48b	IR01_48b	8917	17228	7	1	7	1	88.83	12.68	67.2	74.2	94.6	97.7	98	2461.14	3504.04	299	304	434	5938	8909	27.6	39.3	3.35	3.41	4.87	66.59	99.91
RLX-comp_IR01_48b-B-G181-Map9	Z. tritici IR01_48b	IR01_48b	6968	70042	25	6	22	8	94.05	6.4	74.3	95.3	96.2	97	98	3228.41	2996.38	165	982	1445.5	6958	6981	46.33	43	2.37	14.09	20.74	99.86	100.19
RLX-comp_IR01_48b-B-P16.16-Map4	Z. tritici IR01_48b	IR01_48b	8470	65193	14	7	11	7	90.02	13.2	56.6	94.4	95.54	96.3	97	5926.64	3710.99	156	865	8460	8465	8469	69.97	43.81	1.84	10.21	99.88	99.94	99.99
RLX-comp_IR01_48b-B-R166-Map4_reversed	Z. tritici IR01_48b	IR01_48b	4853	20266	14	3	13	4	83.78	9.39	71.2	75.5	82.3	91.4	98.3	1558.92	2291.42	31	101	113	4851	4886	32.12	47.22	0.64	2.08	2.33	99.96	100.68
RLX-comp_IR01_48b-B-R51-Map20_reversed	Z. tritici IR01_48b	IR01_48b	6344	99768	49	1900-01-09	45	9	89.14	12.79	54.9	90.5	94.6	95.7	97.8	2217.07	2496.93	31	202	685	4068	6388	34.95	39.36	0.49	3.18	10.8	64.12	100.69
RLX-comp_IR01_48b-B-R6-Map20_reversed	Z. tritici IR01_48b	IR01_48b	6827	319066	71	34	63	38	93.43	4.04	77.52	93.1	94.5	95.5	98.1	5064.81	2491.76	66	2764	6795	6814	6837	74.19	36.5	0.97	40.49	99.53	99.81	100.15
RLX-comp_IR01_48b-B-R9-Map20_reversed	Z. tritici IR01_48b	IR01_48b	7018	289466	104	23	89	24	93	6.55	62.88	93.1	95.5	96.5	98.1	3256.83	2738.05	47	261	2936	6914	7107	46.41	39.01	0.67	3.72	41.84	98.52	101.27
RLX-comp_IR01_48b-B-R95-Map5_reversed	Z. tritici IR01_48b	IR01_48b	6717	24938	12	3	11	3	86.91	9.12	75.1	80	84.3	97.6	98.1	2267.73	3101.89	50	65	110	6715	6717	33.76	46.18	0.74	0.97	1.64	99.97	100
RLX-incomp_IR01_48b-B-G14-Map20	Z. tritici IR01_48b	IR01_48b	9986	16739	15	1	12	1	89.99	5.78	76.8	88.42	92.2	93.7	95.3	1394.92	2694.01	43	258	310.5	1819	9670	13.97	26.98	0.43	2.58	3.11	18.22	96.84
RLX-incomp_IR01_48b-B-G145-Map4_reversed	Z. tritici IR01_48b	IR01_48b	7859	40967	19	1	19	1	92.95	4.9	77	91.1	93.7	96	100	2163.68	2361.72	86	143	1117	4707	7854	27.53	30.05	1.09	1.82	14.21	59.89	99.94
RLX-incomp_IR01_48b-B-G151-Map13_reversed	Z. tritici IR01_48b	IR01_48b	6371	105266	52	11	49	13	83.39	11.12	67.9	73.7	78.1	96.53	97.4	2148.57	2723.28	37	121	312	6345	6439	33.72	42.74	0.58	1.9	4.9	99.59	101.07
RLX-incomp_IR01_48b-B-G169-Map3	Z. tritici IR01_48b	IR01_48b	7201	57330	35	1	34	1	91.57	8.69	67.4	93.1	95.35	96.5	98.3	1686.18	1333.77	86	594	2100.5	2113	7211	23.42	18.52	1.19	8.25	29.17	29.34	100.14
RLX-incomp_IR01_48b-B-G171-Map20	Z. tritici IR01_48b	IR01_48b	6901	223023	62	18	57	20	93.9	7.1	56.2	94.7	95.9	96.6	97.5	3913.07	2608.45	33	1695	4237	6802	6861	56.7	37.8	0.48	24.56	61.4	98.57	99.42
RLX-incomp_IR01_48b-B-G188-Map3_reversed	Z. tritici IR01_48b	IR01_48b	12684	77998	31	1	19	1	86.15	8.94	68.2	80.8	84.09	96.5	97.4	4105.58	4360.3	29	93	2043	8584	12818	32.37	34.38	0.23	0.73	16.11	67.68	101.06
RLX-incomp_IR01_48b-B-G192-Map4	Z. tritici IR01_48b	IR01_48b	8275	29780	9	3	9	3	90.84	9.43	70.1	90	92.1	97.6	99	3308.89	3979.07	37	55	282	8272	8277	39.99	48.09	0.45	0.66	3.41	99.96	100.02
RLX-incomp_IR01_48b-B-G193-Map20	Z. tritici IR01_48b	IR01_48b	8399	289480	53	25	49	29	92.69	6.44	56.3	90.6	94.6	96.07	97.4	5907.76	3317.26	30	2465	8350	8365	8416	70.34	39.5	0.36	29.35	99.42	99.6	100.2
RLX-incomp_IR01_48b-B-G195-Map20_reversed	Z. tritici IR01_48b	IR01_48b	13970	319799	62	7	48	10	93.72	3.36	81.3	93.48	94.39	95.95	98.4	6669.44	5082.63	63	1647	6349.5	12452	13927	47.74	36.38	0.45	11.79	45.45	89.13	99.69
RLX-incomp_IR01_48b-B-G202-Map11_reversed	Z. tritici IR01_48b	IR01_48b	11482	266442	55	11	40	13	93.8	5.96	74.3	94.6	96	96.8	97.3	6661.75	4576.42	122	1404	7901	11385	11483	58.02	39.86	1.06	12.23	68.81	99.16	100.01
RLX-incomp_IR01_48b-B-G48-Map20_reversed	Z. tritici IR01_48b	IR01_48b	4174	5467	5	1	5	1	82.1	13.98	61.7	79	80.9	89.5	99.4	1093.4	1765.67	75	133	162	904	4193	26.2	42.3	1.8	3.19	3.88	21.66	100.46
RLX-incomp_IR01_48b-B-R115-Map20	Z. tritici IR01_48b	IR01_48b	9513	127008	41	9	38	10	92.27	4.69	78.5	89.31	93.7	95.8	97.2	3342.32	3983.76	70	180	589	9440	9599	35.13	41.88	0.74	1.89	6.19	99.23	100.9
RLX-incomp_IR01_48b-B-R221-Map4_reversed	Z. tritici IR01_48b	IR01_48b	2846	39066	25	9	22	10	77.7	11.38	56.4	68.3	76.25	86.8	96.4	1775.73	1063.27	53	948	1442.5	2859	2885	62.39	37.36	1.86	33.31	50.69	100.46	101.37
RLX-incomp_IR01_48b-B-R33-Map3	Z. tritici IR01_48b	IR01_48b	6888	115696	63	11	58	12	76.27	12.62	55.9	67.3	73.55	89.6	98.2	1994.76	2694.4	48	163	403.5	2288	7031	28.96	39.12	0.7	2.37	5.86	33.22	102.08
RLX-incomp_IR01_48b-B-R93-Map15	Z. tritici IR01_48b	IR01_48b	6798	53890	24	3	20	4	87.83	12.74	56.8	82.3	95.27	97.5	98.2	2694.7	2745.7	41	221	1451	5481	6790	39.64	40.39	0.6	3.25	21.34	80.63	99.88
RXX-TRIM_IR01_48b-B-G249-Map4	Z. tritici IR01_48b	IR01_48b	639	2203	5	1900-01-02	5	2	97.84	0.43	97.4	97.5	97.7	98.3	98.3	494.8	222.39	114	482	600	639	639	77.43	34.8	17.84	75.43	93.9	100	100
DHX-incomp_KE94-B-G219-Map13_reversed	Z. tritici KE94	KE94	13737	237074	53	5	44	7	90.43	10.1	67.9	92.52	95.3	96.3	100	5388.32	5118.32	32	360	3825.5	10187	13755	39.22	37.26	0.23	2.62	27.85	74.16	100.13
DHX-incomp_KE94-B-P26.0-Map5_reversed	Z. tritici KE94	KE94	13696	104275	23	5	22	6	91.09	11.05	66.6	91.2	96	96.9	100	4739.77	6123.84	32	64	257.5	13674	13704	34.61	44.71	0.23	0.47	1.88	99.84	100.06
DHX-incomp_KE94-B-R152-Map4_reversed	Z. tritici KE94	KE94	6608	18440	21	2	20	2	84.03	11.43	68.8	73	87.7	96.16	98.1	922	2019.55	23	74	141.5	373	6608	13.95	30.56	0.35	1.12	2.14	5.64	100
DHX-incomp_KE94-B-R180-Map5_reversed	Z. tritici KE94	KE94	5346	24177	28	3	26	4	80.54	9.53	62.1	74.2	81.2	86.6	96.4	929.88	1919.38	51	67	85	181	5364	17.39	35.9	0.95	1.25	1.59	3.39	100.34
DMX-incomp_KE94-B-R310-Map5	Z. tritici KE94	KE94	11196	74296	27	3	18	5	90.85	6.42	79.5	88.13	90	96.8	100	4127.56	5051.57	25	51	642	11189	11315	36.87	45.12	0.22	0.46	5.73	99.94	101.06
DTX-comp_KE94-B-G373-Map3	Z. tritici KE94	KE94	2164	35363	36	1900-01-11	28	13	79.57	8.92	64.2	74.3	78	84	97.9	1262.96	933.82	26	485	1409	2168	2214	58.36	43.15	1.2	22.41	65.11	100.18	102.31
DTX-comp_KE94-B-P14.11-Map3	Z. tritici KE94	KE94	2982	38190	34	8	31	9	90.6	7.01	78.2	85.4	94.6	96.8	100	1323.19	1355.71	37	48	777	2967	2997	44.37	45.46	1.24	1.61	26.06	99.5	100.5
DTX-comp_KE94-B-R112-Map7_reversed	Z. tritici KE94	KE94	3568	40907	35	2	24	4	87.38	10.04	66.7	75.63	90.45	97	98.4	1704.46	1247.31	35	562	1440	3086	3584	47.77	34.96	0.98	15.75	40.36	86.49	100.45
DTX-comp_KE94-B-R154-Map7_reversed	Z. tritici KE94	KE94	4310	37960	23	3	22	3	83.81	8.54	70.4	77.6	83.45	86.3	98.5	1725.45	1710.15	54	183	1122.5	3656	4310	40.03	39.68	1.25	4.25	26.04	84.83	100
DTX-comp_KE94-B-R197-Map7_reversed	Z. tritici KE94	KE94	2190	31472	31	6	26	10	82.74	11.49	65.5	74.3	77.8	96.5	98.3	1210.46	903.55	21	327	1110	2189	2212	55.27	41.26	0.96	14.93	50.68	99.95	101
DTX-comp_KE94-B-R21-Map7_reversed	Z. tritici KE94	KE94	3022	13006	8	2	8	2	94.16	6.97	79.1	97.1	97.35	97.9	98.7	1625.75	1175.14	64	844	1512	3016	3018	53.8	38.89	2.12	27.93	50.03	99.8	99.87
DTX-comp_KE94-B-R38-Map6_reversed	Z. tritici KE94	KE94	1338	6630	5	5	5	5	88.5	6.47	80.6	84.5	87.4	93.7	96.3	1326	16.43	1308	1308	1338	1338	1338	99.1	1.23	97.76	97.76	100	100	100
DTX-comp_KE94-B-R60-Map3	Z. tritici KE94	KE94	3367	14711	8	3	8	3	82.33	14.96	57.9	74.1	79.05	98.2	99	1838.88	1677.68	62	251	1950	3367	3537	54.61	49.83	1.84	7.45	57.92	100	105.05
DTX-comp_KE94-B-R92-Map11	Z. tritici KE94	KE94	3520	26354	24	2	24	2	87.34	10.51	67.6	77.8	89.2	97.6	98.5	1098.08	1199.44	38	217	486	2085	3564	31.2	34.07	1.08	6.16	13.81	59.23	101.25
DTX-incomp_KE94-B-G31-Map8	Z. tritici KE94	KE94	7250	30811	15	2	13	2	87.35	14.04	64.3	83.3	96	97.6	98	2370.08	2603.12	48	146	1870	2822	7291	32.69	35.91	0.66	2.01	25.79	38.92	100.57
DTX-incomp_KE94-B-G360-Map5	Z. tritici KE94	KE94	1844	11153	13	1900-01-04	13	4	82.43	10.73	68.1	78	80.2	95	97	857.92	785.91	62	96	1110	1779	1842	46.53	42.62	3.36	5.21	60.2	96.48	99.89
DTX-incomp_KE94-B-G364-Map3	Z. tritici KE94	KE94	1658	11151	19	4	19	4	86.63	8.9	73.7	81.3	83.8	95.6	99.1	586.89	680.6	38	127	301	1620	1826	35.4	41.05	2.29	7.66	18.15	97.71	110.13
DTX-incomp_KE94-B-G44-Map4	Z. tritici KE94	KE94	2926	18909	11	5	10	5	78.04	14.73	57.7	67.86	73.45	97	97.8	1890.9	1185.87	39	1335	2214	2914	2926	64.62	40.53	1.33	45.63	75.67	99.59	100
DTX-incomp_KE94-B-G61-Map6	Z. tritici KE94	KE94	2948	24143	19	4	18	4	89.7	11.61	57.7	86.5	95.27	97	98.3	1341.28	1228.76	31	61	1040	2918	3137	45.5	41.68	1.05	2.07	35.28	98.98	106.41
DTX-incomp_KE94-B-G70-Map3_reversed	Z. tritici KE94	KE94	3171	15973	7	2	6	3	93.86	8.95	75.77	95.4	97.45	98.2	98.9	2662.17	1214.69	193	2997	3137.5	3171	3337	83.95	38.31	6.09	94.51	98.94	100	105.23
DTX-incomp_KE94-B-G81-Map5	Z. tritici KE94	KE94	4388	20247	15	1	13	1	80.69	9.33	68.8	71.34	84.48	86.9	94.1	1557.69	1406.54	44	146	1613	2296	4270	35.5	32.05	1	3.33	36.76	52.32	97.31
DTX-incomp_KE94-B-G98-Map3	Z. tritici KE94	KE94	4037	42957	31	4	24	7	78.97	10.64	59.7	73.6	77	85.54	97.9	1789.96	1722.13	83	315	669	3974	4185	44.34	42.66	2.06	7.8	16.57	98.44	103.67
DTX-incomp_KE94-B-P18.8-Map3	Z. tritici KE94	KE94	1619	13337	11	6	11	6	79.11	12.46	67.2	69.3	76.8	97.4	97.7	1212.45	588.3	28	564	1590	1618	1619	74.89	36.34	1.73	34.84	98.21	99.94	100
DTX-incomp_KE94-B-P19.7-Map3	Z. tritici KE94	KE94	5373	52340	31	6	26	8	79.15	11.6	63.3	70.2	77.3	89.1	98.4	2013.08	2441.6	45	92	548.5	5345	5407	37.47	45.44	0.84	1.71	10.21	99.48	100.63
DTX-incomp_KE94-B-P28.27-Map3	Z. tritici KE94	KE94	869	5526	11	5	10	6	91.65	6.77	81.3	86.7	93.74	97.3	98.5	552.6	407.68	55	65	851.5	868	884	63.59	46.91	6.33	7.48	97.99	99.88	101.73
DTX-incomp_KE94-B-P30.29-Map3_reversed	Z. tritici KE94	KE94	2892	11744	6	4	6	4	89.68	9.85	73	83.7	92.1	98.4	98.8	1957.33	1424.83	75	162	2859.5	2893	2895	67.68	49.27	2.59	5.6	98.88	100.03	100.1
DTX-incomp_KE94-B-R102-Map7	Z. tritici KE94	KE94	3396	23450	30	3	30	3	79.56	10.91	63.2	73	75.35	82.5	98.5	781.67	1172.62	33	112	176.5	1055	3476	23.02	34.53	0.97	3.3	5.2	31.07	102.36
DTX-incomp_KE94-B-R106-Map4	Z. tritici KE94	KE94	3837	19673	22	2	18	3	83.59	8.48	71.4	78.1	82.75	90.9	98.6	1092.94	1634.47	34	112	129.5	3364	3837	28.48	42.6	0.89	2.92	3.38	87.67	100
DTX-incomp_KE94-B-R121-Map4	Z. tritici KE94	KE94	1717	6607	8	2	6	2	90.91	6.11	82.53	85.2	92	95.34	98.4	1102.67	799.18	54	103	1519.5	1704	1716	64.22	46.55	3.15	6	88.5	99.24	99.94
DTX-incomp_KE94-B-R125-Map3	Z. tritici KE94	KE94	2752	8921	7	2	7	2	84.2	13.53	69.9	71.3	82.3	98.1	98.6	1274.43	1316.85	97	189	309	2752	2752	46.31	47.85	3.52	6.87	11.23	100	100
DTX-incomp_KE94-B-R176-Map15	Z. tritici KE94	KE94	4062	48784	53	1900-01-05	47	7	82.26	8.36	67.6	76	78.9	90.5	97.3	1038.11	1512.97	23	111	151	1573	4193	25.56	37.25	0.57	2.73	3.72	38.72	103.23
DTX-incomp_KE94-B-R187-Map3	Z. tritici KE94	KE94	3776	24003	17	6	17	6	78.19	9.29	62.1	74.4	77.6	80.3	97.3	1411.94	1755.96	23	155	201	3686	3805	37.39	46.5	0.61	4.1	5.32	97.62	100.77
DTX-incomp_KE94-B-R205-Map6	Z. tritici KE94	KE94	5376	85602	60	1900-01-08	49	11	78	11.03	57.36	69.4	78.6	88.4	97.2	1746.98	2147.81	46	127	631	3211	5565	32.5	39.95	0.86	2.36	11.74	59.73	103.52
DTX-incomp_KE94-B-R216-Map3	Z. tritici KE94	KE94	1237	3735	3	1900-01-03	3	3	96.3	3.4	92.4	92.4	97.9	98.6	98.6	1245	13.86	1237	1237	1237	1261	1261	100.65	1.12	100	100	100	101.94	101.94
DTX-incomp_KE94-B-R225-Map3	Z. tritici KE94	KE94	389	389	1	1900-01-01	1	1	99.2	0	99.2	99.2	99.2	99.2	99.2	389	0	389	389	389	389	389	100	0	100	100	100	100	100
DTX-incomp_KE94-B-R261-Map3	Z. tritici KE94	KE94	1123	11913	13	6	13	6	77.15	10.97	58.7	71.9	73.1	82.3	100	916.38	287.18	385	681	1066	1112	1126	81.6	25.57	34.28	60.64	94.92	99.02	100.27
DTX-incomp_KE94-B-R279-Map3	Z. tritici KE94	KE94	1632	9906	18	3	17	3	85.21	8.89	71.2	78.8	82.7	93.2	97.8	582.71	730.71	46	53	77	1469	1642	35.71	44.77	2.82	3.25	4.72	90.01	100.61
DTX-incomp_KE94-B-R46-Map3_reversed	Z. tritici KE94	KE94	4599	35970	59	3	57	3	76.05	8.2	64.5	70.6	73.1	79.4	99.2	631.05	1041.38	49	149	288	586	4609	13.72	22.64	1.07	3.24	6.26	12.74	100.22
DTX-incomp_KE94-B-R56-Map14	Z. tritici KE94	KE94	6979	63963	27	6	24	6	93.02	6.04	70.6	89.21	96.1	97.2	98	2665.12	2997.84	36	96	662	6955	6974	38.19	42.96	0.52	1.38	9.49	99.66	99.93
DXX-MITE_KE94-B-G232-Map3	Z. tritici KE94	KE94	354	1061	3	3	3	3	99.53	0.29	99.2	99.2	99.7	99.7	99.7	353.67	0.58	353	353	354	354	354	99.91	0.16	99.72	99.72	100	100	100
DXX-MITE_KE94-B-G247-Map3	Z. tritici KE94	KE94	405	3244	27	3	27	3	85.85	8.25	75	78.5	84.1	94	100	120.15	105.55	34	64	100	117	405	29.67	26.06	8.4	15.8	24.69	28.89	100
DXX-MITE_KE94-B-G252-Map6	Z. tritici KE94	KE94	493	6299	27	9	26	9	86.66	7.17	74.4	80.4	85.12	95.2	97.4	242.27	194.19	41	59	152.5	490	512	49.14	39.39	8.32	11.97	30.93	99.39	103.85
DXX-MITE_KE94-B-G258-Map4	Z. tritici KE94	KE94	503	2557	6	5	6	5	90.83	11.82	69.5	84.1	97.4	98	98.6	426.17	187.49	44	489	500	504	520	84.72	37.27	8.75	97.22	99.4	100.2	103.38
DXX-MITE_KE94-B-G281-Map3	Z. tritici KE94	KE94	626	3748	9	5	9	5	91.01	8.19	77.1	83.5	95.2	97.9	98.6	416.44	274.92	60	70	626	629	646	66.52	43.92	9.58	11.18	100	100.48	103.19
DXX-MITE_KE94-B-P11.14-Map7	Z. tritici KE94	KE94	575	4030	8	7	8	7	95.85	1.71	92.2	95.8	96.5	97	97.4	503.75	183.76	49	567	567.5	571	572	87.61	31.96	8.52	98.61	98.7	99.3	99.48
DXX-MITE_KE94-B-R74-Map4	Z. tritici KE94	KE94	413	7382	21	12	21	12	82.28	11.25	62.5	73.5	80.5	92.7	99.3	351.52	125.56	75	382	412	423	447	85.11	30.4	18.16	92.49	99.76	102.42	108.23
noCat_KE94-B-R10-Map20	Z. tritici KE94	KE94	895	145788	204	13	202	13	90.69	2.5	78.8	89.6	91.2	92.4	97.7	721.72	148.85	30	690	765	793	910	80.64	16.63	3.35	77.09	85.47	88.6	101.68
noCat_KE94-B-R115-Map15	Z. tritici KE94	KE94	9927	82788	43	4	43	4	93.04	5.15	71.4	93.5	94.5	95.9	98.8	1928.56	3065.27	36	113	235	2867	10061	19.43	30.88	0.36	1.14	2.37	28.88	101.35
RIX-comp_KE94-B-G151-Map4_reversed	Z. tritici KE94	KE94	6411	515193	130	2	127	2	95.4	3.64	68.8	95.1	96.09	96.6	98.6	4056.64	2101.82	26	1941	5568	5589	6393	63.28	32.78	0.41	30.28	86.85	87.18	99.72
RIX-comp_KE94-B-G164-Map4	Z. tritici KE94	KE94	6529	61678	24	5	21	6	76.44	11.13	59.9	69.2	71.81	82.2	96.1	2937.05	2667.66	100	200	3110	6439	6584	44.98	40.86	1.53	3.06	47.63	98.62	100.84
RIX-comp_KE94-B-G37-Map5	Z. tritici KE94	KE94	4643	33648	45	1	44	1	81.34	11.25	66.8	71.8	77.2	93.7	100	768.8	935.46	24	245	496	890	4573	16.56	20.15	0.52	5.28	10.68	19.17	98.49
RIX-comp_KE94-B-G85-Map5	Z. tritici KE94	KE94	4581	10248	8	1	8	1	88.27	10.73	65.2	84.6	94.7	94.8	95.5	1281	1458.65	82	328	866.5	1885	4550	27.96	31.84	1.79	7.16	18.92	41.15	99.32
RIX-comp_KE94-B-R139-Map12_reversed	Z. tritici KE94	KE94	20400	475407	111	6	91	7	88.82	8.06	67	83.4	91.91	94.7	98.25	5225.05	6769.5	21	249	931	9271	20054	25.61	33.18	0.1	1.22	4.56	45.45	98.3
RLX-comp_KE94-B-G129-Map20_reversed	Z. tritici KE94	KE94	6472	186060	63	17	57	21	89.16	12.31	56	93.5	94.5	95.2	97.9	3265.26	2716.37	29	380	2973	6288	6428	50.45	41.97	0.45	5.87	45.94	97.16	99.32
RLX-comp_KE94-B-G186-Map8	Z. tritici KE94	KE94	6964	85735	31	1900-01-08	29	9	87.57	12.69	54.7	75.1	96.1	97	97.5	2956.38	3114.58	36	270	542	6956	7092	42.45	44.72	0.52	3.88	7.78	99.89	101.84
RLX-comp_KE94-B-G199-Map5	Z. tritici KE94	KE94	8463	53747	17	1900-01-04	17	4	88.86	11.78	66.6	90.8	94.7	96.3	97.2	3161.59	3668.04	21	301	623	7726	8476	37.36	43.34	0.25	3.56	7.36	91.29	100.15
RLX-comp_KE94-B-P10.15-Map8_reversed	Z. tritici KE94	KE94	6840	219545	60	17	49	23	89.45	10.43	54.7	91.1	94.1	94.8	97.2	4481.43	2802.31	21	1065	6194	6811	6835	65.52	40.97	0.31	15.57	90.56	99.58	99.93
RLX-comp_KE94-B-P31.30-Map3_reversed	Z. tritici KE94	KE94	6323	60682	51	4	44	6	84.12	15.08	55.5	69.7	91.73	97	98.2	1379.14	2115.48	34	220	276.5	1174	6321	21.81	33.46	0.54	3.48	4.37	18.57	99.97
RLX-comp_KE94-B-R109-Map20_reversed	Z. tritici KE94	KE94	13590	202526	62	2	46	2	93.76	6.39	72.4	93.84	96.35	96.9	97.8	4405.93	4102.39	118	893	3594	6699	13700	32.42	30.19	0.87	6.57	26.45	49.29	100.81
RLX-comp_KE94-B-R114-Map9_reversed	Z. tritici KE94	KE94	12659	74529	20	5	19	5	77.84	15.87	54.4	67.9	71.3	95.9	96.9	3922.58	5501.77	47	240	689	12614	12706	30.99	43.46	0.37	1.9	5.44	99.64	100.37
RLX-incomp_KE94-B-G173-Map12	Z. tritici KE94	KE94	6791	56388	31	3	21	5	86.27	13.6	56.6	75.6	92.18	96.9	99.4	2685.14	2729.17	36	245	1809	4915	7046	39.54	40.19	0.53	3.61	26.64	72.38	103.75
RLX-incomp_KE94-B-G189-Map3_reversed	Z. tritici KE94	KE94	7784	104007	117	7	117	7	86.88	8.8	55.6	81	89	94.3	98.3	891.34	2004.01	24	95	182	274	8148	11.45	25.75	0.31	1.22	2.34	3.52	104.68
RLX-incomp_KE94-B-G193-Map20	Z. tritici KE94	KE94	8322	171964	36	13	32	15	95.34	2.18	89.4	94.45	96.35	96.8	98.4	5373.88	3464.92	126	1303	7495	8256	8445	64.57	41.64	1.51	15.66	90.06	99.21	101.48
RLX-incomp_KE94-B-G201-Map3	Z. tritici KE94	KE94	8276	25406	9	3	9	3	82.21	19.28	55.4	58.5	92.2	97.5	97.8	2822.89	4070.42	21	45	223	8193	8278	34.11	49.18	0.25	0.54	2.69	99	100.02
RLX-incomp_KE94-B-G205-Map19_reversed	Z. tritici KE94	KE94	9588	166486	55	6	45	10	91.83	4.77	77.8	90	92.2	95.7	97.2	3699.69	4098.25	64	174	1119	8836	9506	38.59	42.74	0.67	1.81	11.67	92.16	99.14
RLX-incomp_KE94-B-G73-Map20_reversed	Z. tritici KE94	KE94	3919	9123	13	1	13	1	87.39	14.28	57.1	74.6	95.3	97.3	98.9	701.77	1364.5	22	73	118	325	3917	17.91	34.82	0.56	1.86	3.01	8.29	99.95
RLX-incomp_KE94-B-P3.22-Map6_reversed	Z. tritici KE94	KE94	6862	334070	85	27	74	32	93.17	7.96	57.1	94.5	95.3	95.6	97.5	4518.85	2562.97	42	2235	5540	6804	6955	65.85	37.35	0.61	32.57	80.73	99.15	101.36
RLX-incomp_KE94-B-R113-Map3_reversed	Z. tritici KE94	KE94	11703	32628	10	2	9	2	72.34	15.34	56.1	59.57	68.9	76.9	97.9	3625.33	4908.29	91	330	892	5812	11728	30.98	41.94	0.78	2.82	7.62	49.66	100.21
RLX-incomp_KE94-B-R22-Map20_reversed	Z. tritici KE94	KE94	14019	485001	85	14	68	19	92.7	4.1	79.6	91.97	94.43	95.2	97.5	7132.69	5399.76	39	1401	6316	13634	14058	50.88	38.52	0.28	9.99	45.05	97.25	100.28
RLX-incomp_KE94-B-R235-Map3	Z. tritici KE94	KE94	2269	23413	25	4	22	4	77.13	10.61	58.1	69.82	72.8	85.7	98.1	1064.23	868.62	61	122	1158.5	1586	2503	46.9	38.28	2.69	5.38	51.06	69.9	110.31
RLX-incomp_KE94-B-R240-Map7	Z. tritici KE94	KE94	8382	18525	9	2	9	2	78.26	15.04	55.6	66.7	75.7	92.1	94.8	2058.33	3580.13	21	52	227	1086	8358	24.56	42.71	0.25	0.62	2.71	12.96	99.71
RLX-incomp_KE94-B-R245-Map11	Z. tritici KE94	KE94	5032	35761	32	6	30	6	85.05	9.62	71.5	76.6	81.1	93.5	99.2	1192.03	1962.54	26	150	256	328	5050	23.69	39	0.52	2.98	5.09	6.52	100.36
RLX-incomp_KE94-B-R303-Map4_reversed	Z. tritici KE94	KE94	3350	29646	33	1900-01-06	32	7	81.57	13.54	53.9	71.7	89.45	92.2	96.7	926.44	1302.98	48	158	220.5	496	3349	27.65	38.89	1.43	4.72	6.58	14.81	99.97
RLX-incomp_KE94-B-R37-Map3	Z. tritici KE94	KE94	4373	16717	9	2	8	2	90.5	7.69	75.5	86.17	94.3	96.4	97.5	2089.62	1975.24	34	249	1718.5	4361	4373	47.78	45.17	0.78	5.69	39.3	99.73	100
RLX-incomp_KE94-B-R39-Map20	Z. tritici KE94	KE94	6942	430772	121	42	107	45	93.16	7.31	55.7	93.84	95.4	96.1	98.8	4025.99	2910.91	52	1012	4317	6927	7003	57.99	41.93	0.75	14.58	62.19	99.78	100.88
RLX-incomp_KE94-B-R6-Map20_reversed	Z. tritici KE94	KE94	6360	186820	60	21	58	22	88.28	11.04	69.3	77.6	96.07	96.6	97.1	3221.05	2777.6	73	310	3020.5	6356	6360	50.65	43.67	1.15	4.87	47.49	99.94	100
RLX-incomp_KE94-B-R75-Map20	Z. tritici KE94	KE94	8386	84962	37	1	36	1	84.93	13.65	55.8	79.1	87.8	96.8	98	2360.06	2331.51	21	123	1792.5	3799	8378	28.14	27.8	0.25	1.47	21.37	45.3	99.9
RXX-LARD_KE94-B-R352-Map5	Z. tritici KE94	KE94	8521	28765	71	1	70	1	80.69	6.84	68.5	76.3	78.9	83.6	100	410.93	1824.16	23	79	105.5	139	12940	4.82	21.41	0.27	0.93	1.24	1.63	151.86
RXX-TRIM_KE94-B-G248-Map3	Z. tritici KE94	KE94	616	6190	20	4	20	4	81.47	13.54	61.2	63.9	84.5	92.9	99	312.7	216.62	64	115	270	487	616	50.76	35.17	10.39	18.67	43.83	79.06	100
RXX-TRIM_KE94-B-G317-Map7	Z. tritici KE94	KE94	1042	6375	12	2	11	2	92.72	8.8	75	92.9	96.2	97.6	98.2	579.55	377.26	92	260	602	977	1042	55.62	36.21	8.83	24.95	57.77	93.76	100
RXX-TRIM_KE94-B-R230-Map4	Z. tritici KE94	KE94	1148	6698	9	4	9	4	84.89	7.51	75.3	80.2	82.4	89.8	98.8	744.22	449.69	33	488	823	1147	1174	64.83	39.17	2.87	42.51	71.69	99.91	102.26
RXX-TRIM_KE94-B-R320-Map6	Z. tritici KE94	KE94	538	5590	18	8	18	8	92.09	5.05	82.6	88.2	92.9	96.4	100	310.56	215.14	21	174	285	528	540	57.72	39.99	3.9	32.34	52.97	98.14	100.37
RXX-TRIM_KE94-B-R61-Map3	Z. tritici KE94	KE94	525	2869	8	5	7	5	91.08	6.56	82.33	84.3	91.5	97.8	99	409.86	207.84	39	185	527	531	537	78.07	39.59	7.43	35.24	100.38	101.14	102.29
DHX-incomp_OregS90-B-G150-Map5_reversed	Z. tritici OregS90	OregS90	7030	162111	33	22	32	22	91.53	5.06	76.6	90.1	90.65	96.1	97.5	5065.97	3057.3	36	1853	7028	7028	7030	72.06	43.49	0.51	26.36	99.97	99.97	100
DHX-incomp_OregS90-B-G192-Map20_reversed	Z. tritici OregS90	OregS90	13806	229126	63	7	55	9	89.22	8.37	68.7	82	94.74	95.4	100	4165.93	5223.33	32	84	568	7867	13761	30.17	37.83	0.23	0.61	4.11	56.98	99.67
DHX-incomp_OregS90-B-P6.54-Map10	Z. tritici OregS90	OregS90	13739	119311	58	7	58	7	82.81	11.14	68.7	72.2	81.55	92.9	100	2057.09	4577.56	28	28	287	387	13747	14.97	33.32	0.2	0.2	2.09	2.82	100.06
DMX-incomp_OregS90-B-G193-Map4	Z. tritici OregS90	OregS90	11178	108095	47	3	33	8	88.15	6.97	75.2	82.1	86.98	96.3	100	3275.76	4750.47	26	36	75	7512	11312	29.31	42.5	0.23	0.32	0.67	67.2	101.2
DMX-incomp_OregS90-B-G196-Map8	Z. tritici OregS90	OregS90	11304	98419	20	1900-01-07	18	7	90.34	9.33	73.5	83.8	96.1	96.9	100	5467.72	5232.03	27	253	5653	11271	11296	48.37	46.28	0.24	2.24	50.01	99.71	99.93
DMX-incomp_OregS90-B-G200-Map8	Z. tritici OregS90	OregS90	11515	135289	47	9	43	9	83.39	12.07	57.2	73.9	85.3	95.8	98.5	3146.26	4541.22	32	101	487	4616	11513	27.32	39.44	0.28	0.88	4.23	40.09	99.98
DMX-incomp_OregS90-B-R33-Map20	Z. tritici OregS90	OregS90	11406	45940	9	3	8	4	89.63	9.29	73.5	88.4	93.85	96.6	97.16	5742.5	6029.97	42	108	5784	11369	11448	50.35	52.87	0.37	0.95	50.71	99.68	100.37
DTX-comp_OregS90-B-G124-Map3_reversed	Z. tritici OregS90	OregS90	4313	14675	17	3	17	3	82.24	12.13	61.6	76	81.9	91.4	100	863.24	1651.68	26	36	104	238	4313	20.01	38.3	0.6	0.83	2.41	5.52	100
DTX-comp_OregS90-B-G37-Map20	Z. tritici OregS90	OregS90	2920	36464	15	12	15	12	94.47	7.8	75	97	97.6	97.7	98	2430.93	1027.5	51	2901	2902	2904	2917	83.25	35.19	1.75	99.35	99.38	99.45	99.9
DTX-comp_OregS90-B-G380-Map3	Z. tritici OregS90	OregS90	2195	28538	27	4	21	7	84.48	10.32	68.46	76.7	80.4	96.1	98.8	1358.95	768.21	58	639	1502	2159	2194	61.91	35	2.64	29.11	68.43	98.36	99.95
DTX-comp_OregS90-B-G409-Map4_reversed	Z. tritici OregS90	OregS90	2193	22990	28	4	24	6	84.55	9.46	67.49	78.2	82.4	95.2	97.2	957.92	959.14	33	89	584.5	2180	2431	43.68	43.74	1.5	4.06	26.65	99.41	110.85
DTX-comp_OregS90-B-G417-Map4	Z. tritici OregS90	OregS90	2217	15554	12	1900-01-04	10	5	93.09	8.31	76	95.2	97.05	97.5	97.7	1555.4	788.89	39	1067	1868.5	2214	2217	70.16	35.58	1.76	48.13	84.28	99.86	100
DTX-comp_OregS90-B-G55-Map5	Z. tritici OregS90	OregS90	3460	22962	13	1900-01-05	12	5	84.54	12.96	67.48	70.3	89.45	96.7	98.1	1913.5	1506	28	330	1911	3456	3460	55.3	43.53	0.81	9.54	55.23	99.88	100
DTX-comp_OregS90-B-G62-Map7	Z. tritici OregS90	OregS90	3453	34186	14	8	11	10	85.07	10.43	73.53	74	84.1	96.2	97.7	3107.82	1011.16	66	3347	3434	3453	3545	90	29.28	1.91	96.93	99.45	100	102.66
DTX-comp_OregS90-B-G69-Map5	Z. tritici OregS90	OregS90	3587	24983	10	6	8	7	89.58	10.86	75.8	77.8	96.4	98.1	98.4	3122.88	1234.24	70	3507	3582	3587	3587	87.06	34.41	1.95	97.77	99.86	100	100
DTX-comp_OregS90-B-G90-Map6_reversed	Z. tritici OregS90	OregS90	3475	56371	56	1900-01-09	47	13	82.93	9.15	63.2	75.78	82.03	88.9	100	1199.38	1544.48	29	45	140	3330	3481	34.51	44.45	0.83	1.29	4.03	95.83	100.17
DTX-comp_OregS90-B-P16.46-Map6_reversed	Z. tritici OregS90	OregS90	4055	40918	24	8	22	9	82.84	11.05	58.7	76.4	79.15	96.4	98.3	1859.91	1951.87	22	119	290	4052	4128	45.87	48.13	0.54	2.93	7.15	99.93	101.8
DTX-comp_OregS90-B-P29.36-Map4	Z. tritici OregS90	OregS90	3202	18386	23	4	22	5	87.76	9.65	67.4	84.2	91.8	94.6	98.1	835.73	1327.22	30	36	77	626	3232	26.1	41.45	0.94	1.12	2.4	19.55	100.94
DTX-comp_OregS90-B-P75.62-Map4	Z. tritici OregS90	OregS90	1276	4931	6	3	6	3	83.53	18.58	56.2	66.1	90.75	98.3	99.1	821.83	596.07	48	87	1122.5	1275	1276	64.41	46.71	3.76	6.82	87.97	99.92	100
DTX-comp_OregS90-B-P8.53-Map3	Z. tritici OregS90	OregS90	3000	15965	14	3	13	4	88.82	9.32	71.4	80.8	90.5	97.1	98.3	1228.08	1333.17	40	68	351	2998	3018	40.94	44.44	1.33	2.27	11.7	99.93	100.6
DTX-comp_OregS90-B-R265-Map3	Z. tritici OregS90	OregS90	2213	11575	13	3	10	4	82.49	12.49	67.6	73.2	77.01	96.2	97.5	1157.5	1070.97	32	41	1286	2184	2213	52.3	48.39	1.45	1.85	58.11	98.69	100
DTX-incomp_OregS90-B-G138-Map9	Z. tritici OregS90	OregS90	5459	81572	26	1900-01-10	21	12	91.13	8.24	69.8	86.68	96.7	97.3	98.1	3884.38	2152.71	27	2685	5405	5449	5469	71.16	39.43	0.49	49.18	99.01	99.82	100.18
DTX-incomp_OregS90-B-G151-Map20	Z. tritici OregS90	OregS90	8825	17962	9	1	9	1	89.2	8.19	75.3	84.3	90.9	96.4	96.8	1995.78	2680.09	33	49	2236	2350	8464	22.62	30.37	0.37	0.56	25.34	26.63	95.91
DTX-incomp_OregS90-B-G176-Map10_reversed	Z. tritici OregS90	OregS90	7299	89431	44	10	44	10	87.59	8.12	72.9	81.7	82.4	97.8	98.5	2032.52	3075.13	30	71	71	5624	7300	27.85	42.13	0.41	0.97	0.97	77.05	100.01
DTX-incomp_OregS90-B-G185-Map4	Z. tritici OregS90	OregS90	7930	31978	9	4	9	4	94.51	4.74	86.5	92.4	95.7	98.6	98.9	3553.11	4150.94	29	37	118	7928	7930	44.81	52.34	0.37	0.47	1.49	99.97	100
DTX-incomp_OregS90-B-G418-Map4	Z. tritici OregS90	OregS90	2203	12232	30	4	30	4	85.27	6.31	77.1	80.9	83	90.2	97.9	407.73	760.27	40	57	67.5	78	2203	18.51	34.51	1.82	2.59	3.06	3.54	100
DTX-incomp_OregS90-B-G42-Map4	Z. tritici OregS90	OregS90	3157	29379	18	7	17	7	80.62	10.9	64.5	74.7	75.8	85.7	98.1	1728.18	1437.39	22	142	2082	3155	3177	54.74	45.53	0.7	4.5	65.95	99.94	100.63
DTX-incomp_OregS90-B-G63-Map6_reversed	Z. tritici OregS90	OregS90	3467	25494	19	1900-01-07	19	7	83.62	10.28	69.6	74.5	81.1	96.8	97.8	1341.79	1659.18	66	73	164	3456	3467	38.7	47.86	1.9	2.11	4.73	99.68	100
DTX-incomp_OregS90-B-G70-Map7	Z. tritici OregS90	OregS90	5449	38970	13	5	10	7	86.43	9.98	69.5	78.4	90.5	92.1	98.25	3897	2488.58	96	505	5422	5449	5501	71.52	45.67	1.76	9.27	99.5	100	100.95
DTX-incomp_OregS90-B-G76-Map3_reversed	Z. tritici OregS90	OregS90	3800	45285	28	6	20	8	79.86	10.15	61	73.5	77.79	92.8	99	2264.25	1702.96	28	240	3297.5	3792	3817	59.59	44.81	0.74	6.32	86.78	99.79	100.45
DTX-incomp_OregS90-B-P56.0-Map8	Z. tritici OregS90	OregS90	5360	48832	20	8	19	9	90.77	6.69	79.5	83.9	93.6	97.1	97.4	2570.11	2712.57	47	69	80	5356	5369	47.95	50.61	0.88	1.29	1.49	99.93	100.17
DTX-incomp_OregS90-B-P59.14-Map12	Z. tritici OregS90	OregS90	6123	79405	14	12	13	13	96.59	3.05	86.51	97.1	97.5	97.7	97.8	6108.08	10.23	6096	6103	6105	6110	6137	99.76	0.17	99.56	99.67	99.71	99.79	100.23
DTX-incomp_OregS90-B-P62.11-Map5	Z. tritici OregS90	OregS90	7132	120911	44	10	36	12	92.14	4.53	75.2	91	92.56	94.6	98.2	3358.64	3130.53	44	96	3376	6958	7286	47.09	43.89	0.62	1.35	47.34	97.56	102.16
DTX-incomp_OregS90-B-P71.2-Map3	Z. tritici OregS90	OregS90	1177	9100	12	5	12	5	80.33	12.14	70.2	71	71.8	90.8	99.8	758.33	435.67	39	596	833.5	1176	1177	64.43	37.01	3.31	50.64	70.82	99.92	100
DTX-incomp_OregS90-B-R105-Map12_reversed	Z. tritici OregS90	OregS90	4204	65986	40	10	34	14	83.26	9.42	69.5	73.1	83.8	92.9	96.3	1940.76	1979.07	22	71	413	4109	4186	46.16	47.08	0.52	1.69	9.82	97.74	99.57
DTX-incomp_OregS90-B-R111-Map11	Z. tritici OregS90	OregS90	5453	60139	27	6	21	10	88.32	7.19	65.4	84.86	89.2	93.3	97.2	2863.76	2643.43	31	53	4432	5406	5546	52.52	48.48	0.57	0.97	81.28	99.14	101.71
DTX-incomp_OregS90-B-R143-Map5	Z. tritici OregS90	OregS90	2937	29582	25	4	22	6	88.07	9.25	67.8	84.5	89.15	94.3	98.7	1344.64	1170.65	31	61	1348.5	2838	2935	45.78	39.86	1.06	2.08	45.91	96.63	99.93
DTX-incomp_OregS90-B-R179-Map3	Z. tritici OregS90	OregS90	1564	4071	5	2	4	2	81.35	17.5	62.3	71	82.1	98.9	98.9	1017.75	678.29	190	736	1149.5	1582	1582	65.07	43.37	12.15	47.06	73.5	101.15	101.15
DTX-incomp_OregS90-B-R227-Map3_reversed	Z. tritici OregS90	OregS90	3189	33200	25	8	21	9	85.86	8.56	75.51	76.9	84.3	92.9	100	1580.95	1611.66	34	54	468	3181	3604	49.58	50.54	1.07	1.69	14.68	99.75	113.01
DTX-incomp_OregS90-B-R23-Map20	Z. tritici OregS90	OregS90	5502	117951	41	12	28	16	86	10.74	65.3	74.8	90.62	96.8	96.9	4212.54	2198.64	29	4912	5439	5475	5511	76.56	39.96	0.53	89.28	98.85	99.51	100.16
DTX-incomp_OregS90-B-R287-Map3	Z. tritici OregS90	OregS90	1333	6612	7	4	6	4	85.44	10.11	73.3	76.8	84.28	96.8	97.2	1102	347.75	613	696	1319.5	1331	1333	82.67	26.09	45.99	52.21	98.99	99.85	100
DTX-incomp_OregS90-B-R34-Map14_reversed	Z. tritici OregS90	OregS90	4060	30834	47	1	39	3	85.14	7.9	70.9	79.9	84.2	93.4	97.5	791.46	1324.22	23	104	144	351	4090	19.49	32.62	0.57	2.56	3.55	8.65	100.74
DTX-incomp_OregS90-B-R340-Map3	Z. tritici OregS90	OregS90	1694	5119	6	2	4	3	91.18	7.53	83.63	86.4	90.55	100	100	1279.75	821.18	48	1684	1688.5	1694	1694	75.55	48.48	2.83	99.41	99.68	100	100
DTX-incomp_OregS90-B-R356-Map3	Z. tritici OregS90	OregS90	2893	16398	14	3	12	3	81.01	11.78	64.73	70.1	81.4	93.2	98.7	1366.5	1124.1	45	145	1343.5	2877	2893	47.23	38.86	1.56	5.01	46.44	99.45	100
DTX-incomp_OregS90-B-R372-Map4	Z. tritici OregS90	OregS90	2883	34990	28	6	26	8	85.46	10.41	68.6	75.3	88.05	96.1	98.5	1345.77	1277.2	37	78	1055	2760	2905	46.68	44.3	1.28	2.71	36.59	95.73	100.76
DTX-incomp_OregS90-B-R378-Map3	Z. tritici OregS90	OregS90	3114	9820	13	1900-01-02	13	2	80.03	10.66	66.8	73.4	78	81	100	755.38	1170.7	24	63	110	1056	3114	24.26	37.59	0.77	2.02	3.53	33.91	100
DTX-incomp_OregS90-B-R388-Map4	Z. tritici OregS90	OregS90	2046	17803	29	2	29	2	76.41	9.91	69.4	70.1	71.9	78.3	100	613.9	508.62	96	277	467	654	2046	30	24.86	4.69	13.54	22.83	31.96	100
DTX-incomp_OregS90-B-R41-Map16	Z. tritici OregS90	OregS90	2369	30723	25	6	20	9	87.11	10.02	68.4	78.66	89.7	96.75	97.6	1536.15	963.91	34	755	2225	2347	2358	64.84	40.69	1.44	31.87	93.92	99.07	99.54
DTX-incomp_OregS90-B-R63-Map3_reversed	Z. tritici OregS90	OregS90	2972	26060	24	4	20	6	88.86	6.38	78.4	84.6	87.6	94.9	98	1304	1317.19	32	47	694	2972	3007	43.88	44.32	1.08	1.58	23.35	100	101.18
DTX-incomp_OregS90-B-R81-Map9	Z. tritici OregS90	OregS90	3359	34331	31	1	26	3	84.69	11.07	71.2	73.5	84.6	97.4	97.9	1320.42	1266.18	36	175	937	2676	3539	39.31	37.7	1.07	5.21	27.9	79.67	105.36
DTX-incomp_OregS90-B-R9-Map3_reversed	Z. tritici OregS90	OregS90	2140	22154	15	7	13	8	81.67	8.58	72.3	75	80	86	98.2	1704.15	760.91	42	1756	2121	2140	2157	79.63	35.56	1.96	82.06	99.11	100	100.79
DXX_OregS90-B-R254-Map3_reversed	Z. tritici OregS90	OregS90	4735	4912	4	1	4	1	89.58	8.87	77.6	89.8	90.9	98.9	98.9	1228	2337.38	49	49	64.5	4734	4734	25.93	49.36	1.03	1.03	1.36	99.98	99.98
DXX-MITE_OregS90-B-G216-Map4	Z. tritici OregS90	OregS90	354	1656	6	3	6	3	97.2	2.96	91.9	96.3	97.95	99.4	99.7	276	123.04	37	250	335.5	344	354	77.97	34.76	10.45	70.62	94.77	97.18	100
DXX-MITE_OregS90-B-G220-Map4	Z. tritici OregS90	OregS90	342	1677	5	4	5	4	94	13.25	70.3	99.7	100	100	100	335.4	11.04	316	337	340	342	342	98.07	3.23	92.4	98.54	99.42	100	100
DXX-MITE_OregS90-B-G236-Map3	Z. tritici OregS90	OregS90	391	1173	3	1900-01-03	3	3	99.67	0.58	99	99	100	100	100	391	0	391	391	391	391	391	100	0	100	100	100	100	100
DXX-MITE_OregS90-B-G240-Map3	Z. tritici OregS90	OregS90	407	2492	19	3	19	3	89.99	7.69	76.9	82.9	94	95	100	131.16	123.52	51	64	100	100	407	32.23	30.35	12.53	15.72	24.57	24.57	100
DXX-MITE_OregS90-B-G245-Map3	Z. tritici OregS90	OregS90	415	4411	12	7	12	7	82.51	11.34	67.3	74.7	78.9	98.5	100	367.58	111.97	99	390	414.5	423	447	88.57	26.98	23.86	93.98	99.88	101.93	107.71
DXX-MITE_OregS90-B-G260-Map4	Z. tritici OregS90	OregS90	494	2411	5	4	5	4	92.5	9.31	78.6	87.1	98.4	99.2	99.2	482.2	14.38	457	485	488	488	493	97.61	2.91	92.51	98.18	98.79	98.79	99.8
DXX-MITE_OregS90-B-G262-Map3	Z. tritici OregS90	OregS90	496	1851	7	1900-01-03	7	3	91.49	7.54	83.7	83.7	89.5	99.2	99.8	264.43	223.9	49	49	219	495	496	53.31	45.14	9.88	9.88	44.15	99.8	100
DXX-MITE_OregS90-B-G273-Map5	Z. tritici OregS90	OregS90	650	3878	7	1900-01-06	7	6	94.27	5.9	82.1	90.9	97.1	97.5	98	554	225.26	44	625	629	649	658	85.23	34.65	6.77	96.15	96.77	99.85	101.23
DXX-MITE_OregS90-B-R109-Map3	Z. tritici OregS90	OregS90	506	1037	3	2	3	2	95.7	3.73	93.3	93.3	93.8	100	100	345.67	273.39	30	30	501	506	506	68.31	54.03	5.93	5.93	99.01	100	100
DXX-MITE_OregS90-B-R148-Map3	Z. tritici OregS90	OregS90	477	2967	7	6	7	6	84.67	14.11	71.1	73.1	76.1	100	100	423.86	156.05	71	462	477	494	496	88.86	32.72	14.88	96.86	100	103.56	103.98
DXX-MITE_OregS90-B-R168-Map4	Z. tritici OregS90	OregS90	401	2591	12	4	12	4	87.93	7.99	73	82.2	87.9	96.7	98	215.92	152.39	44	55	206	401	404	53.84	38	10.97	13.72	51.37	100	100.75
DXX-MITE_OregS90-B-R240-Map3	Z. tritici OregS90	OregS90	489	4378	12	5	12	5	86.23	9.89	73	78.7	81.2	98	99.2	364.83	185.19	25	387	444.5	501	511	74.61	37.87	5.11	79.14	90.9	102.45	104.5
DXX-MITE_OregS90-B-R376-Map3	Z. tritici OregS90	OregS90	416	1760	5	3	4	2	91.48	12.86	72.5	94.61	96.7	100	100	440	29.68	416	416	433.5	477	477	105.77	7.13	100	100	104.21	114.66	114.66
noCat_OregS90-B-G14-Map20	Z. tritici OregS90	OregS90	5077	12090	9	1	9	1	93.08	6.73	78.2	95	96.2	96.2	97.6	1343.33	1546.72	211	287	952	1760	5043	26.46	30.47	4.16	5.65	18.75	34.67	99.33
noCat_OregS90-B-G324-Map12	Z. tritici OregS90	OregS90	879	33219	47	18	47	18	95.06	3.6	85	91.9	96.3	98.1	99.3	706.79	245.21	54	733	822	859	896	80.41	27.9	6.14	83.39	93.52	97.72	101.93
noCat_OregS90-B-P7.4-Map15	Z. tritici OregS90	OregS90	854	36210	51	3	50	3	92.83	2.63	83.8	91.6	92.95	94.2	99.3	724.2	150.14	68	756	770	783	820	84.8	17.58	7.96	88.52	90.16	91.69	96.02
noCat_OregS90-B-R112-Map15	Z. tritici OregS90	OregS90	5323	36170	18	4	16	4	90.97	7.25	74.1	85.7	91.75	97.97	98.6	2260.62	2285.37	36	231	1373.5	5269	5365	42.47	42.93	0.68	4.34	25.8	98.99	100.79
noCat_OregS90-B-R157-Map13	Z. tritici OregS90	OregS90	856	104051	132	1900-02-22	130	54	91.22	2.78	85	90	91.3	92.2	99.2	800.39	86.33	74	768	812	832	939	93.5	10.09	8.64	89.72	94.86	97.2	109.7
noCat_OregS90-B-R45-Map20	Z. tritici OregS90	OregS90	875	56497	75	14	73	14	92.87	2.06	81	92.1	92.7	94.2	98.5	773.93	126.97	68	758	789	817	926	88.45	14.51	7.77	86.63	90.17	93.37	105.83
RIX-comp_OregS90-B-G64-Map5_reversed	Z. tritici OregS90	OregS90	4539	22822	29	1900-01-02	26	2	92.94	7.59	70.7	93.6	95.05	98.1	100	880.62	1300.3	28	90	362.5	1136	4547	19.4	28.65	0.62	1.98	7.99	25.03	100.18
RIX-comp_OregS90-B-P19.44-Map14	Z. tritici OregS90	OregS90	5629	430125	132	55	126	59	96.79	3.12	77.4	94.9	97.95	99.2	100	3413.69	2351.62	32	719	4798	5583	5615	60.64	41.78	0.57	12.77	85.24	99.18	99.75
RIX-comp_OregS90-B-R3-Map20	Z. tritici OregS90	OregS90	12026	184383	76	1	58	3	88.42	8.68	71.2	81.1	92.94	95.1	97	3180.33	4064.61	24	236	989.5	4950	12043	26.45	33.8	0.2	1.96	8.23	41.16	100.14
RIX-incomp_OregS90-B-R353-Map4	Z. tritici OregS90	OregS90	4942	9505	7	1	5	1	84.68	7.03	79.33	79.7	80.26	89.2	94.9	1901	2003.57	128	236	1626	2498	5017	38.47	40.54	2.59	4.78	32.9	50.55	101.52
RLX-comp_OregS90-B-G140-Map4	Z. tritici OregS90	OregS90	6235	29141	14	3	13	3	79.77	17.47	57.6	61.6	84	96.3	98.4	2241.62	2755.17	35	99	687	5578	6233	35.95	44.19	0.56	1.59	11.02	89.46	99.97
RLX-comp_OregS90-B-G141-Map20_reversed	Z. tritici OregS90	OregS90	6837	312830	86	27	65	36	91.32	6.76	71.7	89.7	92.3	96.4	100	4815.22	2674.18	23	2341	6794	6822	6875	70.43	39.11	0.34	34.24	99.37	99.78	100.56
RLX-comp_OregS90-B-G143-Map15_reversed	Z. tritici OregS90	OregS90	6722	63769	15	1900-01-05	14	6	93.9	5.91	74.8	92.6	96.28	96.9	97.4	4554.93	2359.1	157	3400	4713.5	6718	6733	67.76	35.1	2.34	50.58	70.12	99.94	100.16
RLX-comp_OregS90-B-G177-Map19	Z. tritici OregS90	OregS90	6020	29679	16	1900-01-04	16	4	93.06	7.24	79.4	91.6	94.85	99.6	99.9	1858.06	2549.56	50	80	495	6016	6024	30.86	42.35	0.83	1.33	8.22	99.93	100.07
RLX-comp_OregS90-B-P15.47-Map13_reversed	Z. tritici OregS90	OregS90	6352	168728	58	19	52	23	93.42	8.35	57.1	92.5	94.95	97.8	100	3244.77	2899.97	29	278	3155.5	6298	6458	51.08	45.65	0.46	4.38	49.68	99.15	101.67
RLX-comp_OregS90-B-R181-Map3	Z. tritici OregS90	OregS90	6314	22012	16	2	13	3	86.09	9.91	58.44	83.7	87.57	93	96.02	1693.23	2627.42	49	173	265	1599	6329	26.82	41.61	0.78	2.74	4.2	25.32	100.24
RLX-comp_OregS90-B-R27-Map20	Z. tritici OregS90	OregS90	8463	170180	26	18	25	19	96.03	1.99	92.2	95.6	96.2	96.8	100	6807.2	3156.36	38	8423	8461	8463	8484	80.43	37.3	0.45	99.53	99.98	100	100.25
RLX-comp_OregS90-B-R295-Map11	Z. tritici OregS90	OregS90	6795	52142	25	1	20	2	86.92	11.94	58.9	83.8	90.84	97.8	98.5	2607.3	2705.7	55	227	1221	5456	6790	38.37	39.82	0.81	3.34	17.97	80.29	99.93
RLX-comp_OregS90-B-R37-Map6_reversed	Z. tritici OregS90	OregS90	7955	83709	46	5	35	5	76.92	11.33	63.2	69.65	71.9	81.8	97.7	2391.69	2979.73	23	106	936	5317	8122	30.07	37.46	0.29	1.33	11.77	66.84	102.1
RLX-comp_OregS90-B-R5-Map20	Z. tritici OregS90	OregS90	6386	114902	53	13	49	14	91.66	9.68	56.2	92	94.8	95.5	98.8	2346.06	2772.83	34	290	688	6293	6429	36.74	43.42	0.53	4.54	10.77	98.54	100.67
RLX-comp_OregS90-B-R82-Map17_reversed	Z. tritici OregS90	OregS90	6958	54240	28	1	27	2	87.43	11.38	64.4	76.4	95.9	97.1	98.3	2013.93	2451.59	31	159	883	4651	7101	28.94	35.23	0.45	2.29	12.69	66.84	102.06
RLX-comp_OregS90-B-R95-Map20	Z. tritici OregS90	OregS90	13591	110321	37	2	32	2	91.91	8.7	72.7	91.31	96.55	97.2	99	3447.78	4460.52	29	257	1232	5524	13569	25.37	32.82	0.21	1.89	9.06	40.64	99.84
RLX-incomp_OregS90-B-G123-Map4_reversed	Z. tritici OregS90	OregS90	6066	28351	15	1	15	1	91.57	8.22	67.9	87.2	95.3	96.4	97.5	1890.07	2371.52	24	82	393	4873	6064	31.16	39.1	0.4	1.35	6.48	80.33	99.97
RLX-incomp_OregS90-B-G154-Map4_reversed	Z. tritici OregS90	OregS90	8362	46414	17	2	17	2	92.54	7.47	66.7	91.4	94	96.1	100	2730.24	2835.81	26	61	2461	4112	8361	32.65	33.91	0.31	0.73	29.43	49.17	99.99
RLX-incomp_OregS90-B-G166-Map20_reversed	Z. tritici OregS90	OregS90	7130	245101	102	15	68	22	92.45	5.3	76.7	92.7	94.45	95.9	97.26	3608.4	2928.3	29	359	3781	6929	7141	50.61	41.07	0.41	5.04	53.03	97.18	100.15
RLX-incomp_OregS90-B-G168-Map6	Z. tritici OregS90	OregS90	7079	68214	23	6	19	6	85.11	11.26	66.7	73.53	86.5	97	97.6	3590.21	3147.29	63	233	3613	7077	7181	50.72	44.46	0.89	3.29	51.04	99.97	101.44
RLX-incomp_OregS90-B-G182-Map13_reversed	Z. tritici OregS90	OregS90	8313	125204	24	12	22	14	94.96	4.58	78.2	95.9	96.8	97.2	98.2	5692.09	3658.82	35	366	8282.5	8295	8328	68.47	44.01	0.42	4.4	99.63	99.78	100.18
RLX-incomp_OregS90-B-G201-Map5_reversed	Z. tritici OregS90	OregS90	13701	41531	6	2	5	3	91.91	6.77	80.6	90.9	95.13	95.3	97.6	8306.2	7426.04	76	268	13672	13686	13829	60.62	54.2	0.55	1.96	99.79	99.89	100.93
RLX-incomp_OregS90-B-G203-Map4_reversed	Z. tritici OregS90	OregS90	12117	65975	16	4	15	4	76.43	13.61	58.2	64.9	73.9	93.3	97.3	4398.33	5200.23	21	126	1003	12052	12190	36.3	42.92	0.17	1.04	8.28	99.46	100.6
RLX-incomp_OregS90-B-G205-Map3	Z. tritici OregS90	OregS90	13291	124753	38	5	27	6	76.97	12.29	58	66.6	74.2	86.03	97.7	4620.48	5535.81	25	75	864	9128	13416	34.76	41.65	0.19	0.56	6.5	68.68	100.94
RLX-incomp_OregS90-B-G304-Map20_reversed	Z. tritici OregS90	OregS90	947	12760	18	12	18	12	97.33	3.33	88	94.7	98.85	99.5	99.8	708.89	361.01	139	156	946	946	946	74.86	38.12	14.68	16.47	99.89	99.89	99.89
RLX-incomp_OregS90-B-G346-Map12	Z. tritici OregS90	OregS90	1597	4569	33	0	33	0	93.68	4.37	83.9	91.2	92	98.1	99.9	138.45	183.51	46	46	125	125	1053	8.67	11.49	2.88	2.88	7.83	7.83	65.94
RLX-incomp_OregS90-B-G82-Map10	Z. tritici OregS90	OregS90	3570	59367	46	11	44	11	89.19	10.89	73.7	77.2	97.05	99.1	100	1349.25	1448.46	162	252	375.5	3556	3570	37.79	40.57	4.54	7.06	10.52	99.61	100
RLX-incomp_OregS90-B-G9-Map4	Z. tritici OregS90	OregS90	7195	25720	19	1	14	1	90.39	3.89	84.1	89.1	90.25	92.8	96.9	1837.14	2577.33	30	173	411	4413	7187	25.53	35.82	0.42	2.4	5.71	61.33	99.89
RLX-incomp_OregS90-B-P22.41-Map16	Z. tritici OregS90	OregS90	9461	266527	43	20	35	26	94.09	5.14	73.8	92.1	96.67	96.9	97.5	7615.06	3549.7	35	8175	9455	9466	9513	80.49	37.52	0.37	86.41	99.94	100.05	100.55
RLX-incomp_OregS90-B-R100-Map17	Z. tritici OregS90	OregS90	8277	67160	13	4	10	7	95.59	1.96	90.5	95.3	96.32	96.6	97.6	6716	2758.21	878	5489	8250	8281	8418	81.14	33.32	10.61	66.32	99.67	100.05	101.7
RLX-incomp_OregS90-B-R108-Map5_reversed	Z. tritici OregS90	OregS90	6394	49394	52	1900-01-02	41	3	75.26	12.83	60.6	65.7	67.81	88.7	96.8	1204.73	1767.08	52	367	373	1429	6459	18.84	27.64	0.81	5.74	5.83	22.35	101.02
RLX-incomp_OregS90-B-R11-Map20_reversed	Z. tritici OregS90	OregS90	6379	592433	146	68	124	80	94.21	5.79	69.8	94.28	95.7	97.3	98.1	4777.79	2440.82	84	2948	6357	6363	6719	74.9	38.26	1.32	46.21	99.66	99.75	105.33
RLX-incomp_OregS90-B-R116-Map6	Z. tritici OregS90	OregS90	13744	13718	1	1	1	1	95.1	0	95.1	95.1	95.1	95.1	95.1	13718	0	13718	13718	13718	13718	13718	99.81	0	99.81	99.81	99.81	99.81	99.81
RLX-incomp_OregS90-B-R170-Map13_reversed	Z. tritici OregS90	OregS90	8368	55697	32	1	28	1	88.72	11.97	56.2	82.3	91.51	98	100	1989.25	2600.45	28	49	435	4113	8359	23.77	31.08	0.33	0.59	5.2	49.15	99.89
RLX-incomp_OregS90-B-R182-Map3	Z. tritici OregS90	OregS90	5929	97471	48	4	37	8	75.98	8.12	66.4	71.7	72.9	75.4	97.2	2634.35	2185.26	110	607	2069	3604	5989	44.43	36.86	1.86	10.24	34.9	60.79	101.01
RLX-incomp_OregS90-B-R2-Map20_reversed	Z. tritici OregS90	OregS90	6803	391723	89	38	73	47	94.98	3.57	71.6	93.47	96.4	96.82	98.5	5366.56	2336.48	165	4377	6795	6801	6978	78.89	34.34	2.43	64.34	99.88	99.97	102.57
RLX-incomp_OregS90-B-R281-Map3	Z. tritici OregS90	OregS90	5185	34004	10	4	10	4	93.98	1.76	90	93.6	93.8	95.2	96.2	3400.4	2025.99	25	2659	3754	5187	5214	65.58	39.07	0.48	51.28	72.4	100.04	100.56
RLX-incomp_OregS90-B-R314-Map3	Z. tritici OregS90	OregS90	8788	20755	14	2	12	2	76.68	9.64	69.01	71.3	72.6	79.5	100	1729.58	3302.8	77	249	334	753	8793	19.68	37.58	0.88	2.83	3.8	8.57	100.06
RLX-incomp_OregS90-B-R60-Map20_reversed	Z. tritici OregS90	OregS90	13944	226149	53	2	40	3	93.11	4.69	78.2	93.3	94.9	95.6	96.3	5653.73	4260.71	152	2399	4191	9419	13831	40.55	30.56	1.09	17.2	30.06	67.55	99.19
RXX-TRIM_OregS90-B-G315-Map7	Z. tritici OregS90	OregS90	1276	5007	6	2	6	2	88.57	10.09	75.3	76.3	92.85	96.5	97.6	834.5	581.15	92	92	1117.5	1276	1312	65.4	45.54	7.21	7.21	87.58	100	102.82
RXX-TRIM_OregS90-B-R18-Map9	Z. tritici OregS90	OregS90	551	6540	15	9	15	9	90.33	4.52	82.2	86.5	90.8	93.4	96.9	436	145.79	182	349	535	541	553	79.13	26.46	33.03	63.34	97.1	98.19	100.36
DHX-incomp_TN09-B-G172-Map4	Z. tritici TN09	TN09	7258	51749	13	7	13	7	85.01	8.79	71.7	78.2	83	94.3	97.1	3980.69	3645.84	54	121	7135	7220	7268	54.85	50.23	0.74	1.67	98.31	99.48	100.14
DHX-incomp_TN09-B-G220-Map5_reversed	Z. tritici TN09	TN09	10087	111834	26	8	26	8	93.86	7.85	72.5	95.3	97.25	97.7	100	4303.42	4492.15	26	70	2672.5	10042	10141	42.66	44.53	0.26	0.69	26.49	99.55	100.54
DHX-incomp_TN09-B-P10.15-Map5	Z. tritici TN09	TN09	13691	95442	17	5	16	5	95.17	6.81	70.5	96.1	96.9	97.8	100	5965.12	6132.47	51	229	2682.5	13618	13686	43.57	44.79	0.37	1.67	19.59	99.47	99.96
DHX-incomp_TN09-B-P15.15-Map5	Z. tritici TN09	TN09	13734	161934	25	10	24	11	91.99	9.66	69.9	92.9	96.7	97.3	98.5	6747.25	6774.63	51	160	4721	13724	13871	49.13	49.33	0.37	1.16	34.37	99.93	101
DHX-incomp_TN09-B-R167-Map4	Z. tritici TN09	TN09	7586	25828	34	2	33	2	78.77	10.26	58	73.6	78.8	85	98.4	782.67	1745.72	35	107	363	505	7595	10.32	23.01	0.46	1.41	4.79	6.66	100.12
DHX-incomp_TN09-B-R170-Map9	Z. tritici TN09	TN09	14589	95983	41	3	38	3	87.57	8.41	63.2	83.9	87.95	95.3	98.2	2525.87	4470.04	34	130	150.5	2817	14724	17.31	30.64	0.23	0.89	1.03	19.31	100.93
DHX-incomp_TN09-B-R2-Map7_reversed	Z. tritici TN09	TN09	9338	89572	73	2	70	2	77.56	10	62.2	70.8	74.25	81.2	100	1281.74	2380.69	26	81	260	799	9335	13.73	25.49	0.28	0.87	2.78	8.56	99.97
DHX-incomp_TN09-B-R290-Map5_reversed	Z. tritici TN09	TN09	2541	16303	11	4	11	4	84.37	13.13	67.6	71.5	92.3	95.8	98.7	1482.09	938.42	29	947	1388	2534	2570	58.33	36.93	1.14	37.27	54.62	99.72	101.14
DTX-comp_TN09-B-G101-Map5_reversed	Z. tritici TN09	TN09	3565	37867	19	5	13	9	89.12	8.66	72.9	81.8	94.59	95.7	97.9	2912.85	1127.73	513	2756	3537	3540	3550	81.71	31.63	14.39	77.31	99.21	99.3	99.58
DTX-comp_TN09-B-G418-Map4	Z. tritici TN09	TN09	2221	33092	24	9	18	12	81.94	9.22	71	74.2	79.25	89.4	97	1838.44	733.61	73	1861	2192.5	2217	2246	82.78	33.03	3.29	83.79	98.72	99.82	101.13
DTX-comp_TN09-B-G55-Map5	Z. tritici TN09	TN09	3132	28264	12	6	12	6	82.05	12.94	66.7	70.3	78.3	96.5	97.4	2355.33	1112.2	118	2231	2731	3131	3260	75.2	35.51	3.77	71.23	87.2	99.97	104.09
DTX-comp_TN09-B-R100-Map3_reversed	Z. tritici TN09	TN09	3274	39950	29	7	26	8	81.47	7.34	70.1	76.9	80.45	85.2	97.1	1536.54	1429.17	29	269	688	3177	3313	46.93	43.65	0.89	8.22	21.01	97.04	101.19
DTX-comp_TN09-B-R137-Map11	Z. tritici TN09	TN09	3566	34620	24	2	21	2	89.31	10.38	72.3	82.3	96.8	97.7	98.9	1648.57	1335.42	70	384	1076	2952	3568	46.23	37.45	1.96	10.77	30.17	82.78	100.06
DTX-comp_TN09-B-R138-Map4_reversed	Z. tritici TN09	TN09	2166	26902	19	9	17	11	82.87	8.59	73.5	77.49	79.3	86.6	97.8	1582.47	867.39	45	797	2164	2185	2218	73.06	40.05	2.08	36.8	99.91	100.88	102.4
DTX-comp_TN09-B-R140-Map9_reversed	Z. tritici TN09	TN09	3199	26828	27	2	26	3	80.34	13.59	64.8	70.1	72.5	97.7	99.8	1031.85	962.17	176	378	500	1401	3199	32.26	30.08	5.5	11.82	15.63	43.79	100
DTX-comp_TN09-B-R141-Map3	Z. tritici TN09	TN09	2195	16805	17	2	12	5	79.24	10.95	65.6	71.8	75.92	93.3	96.3	1400.42	860.1	54	524	1633	2186	2208	63.8	39.18	2.46	23.87	74.4	99.59	100.59
DTX-comp_TN09-B-R165-Map4	Z. tritici TN09	TN09	4596	44332	27	2	24	2	78.39	9.51	68.3	70.3	77.6	83.9	98.1	1847.17	1594.65	29	503	1216	3438	4597	40.19	34.7	0.63	10.94	26.46	74.8	100.02
DTX-comp_TN09-B-R191-Map3_reversed	Z. tritici TN09	TN09	2189	9095	9	2	9	2	87.36	9.95	73.8	80	86.4	97.2	98.1	1010.56	962.02	43	114	836	2079	2189	46.17	43.95	1.96	5.21	38.19	94.97	100
DTX-comp_TN09-B-R243-Map3_reversed	Z. tritici TN09	TN09	3190	8058	8	1	7	2	79.8	12.07	71.7	72.4	73.2	97.2	97.68	1151.14	1408.23	217	233	396	3198	3221	36.09	44.15	6.8	7.3	12.41	100.25	100.97
DTX-comp_TN09-B-R244-Map7	Z. tritici TN09	TN09	3509	18251	11	3	10	4	87.84	10.38	74.6	77.3	89.02	97.5	98.3	1825.1	1624.02	83	149	1756.5	3509	3564	52.01	46.28	2.37	4.25	50.06	100	101.57
DTX-comp_TN09-B-R44-Map12	Z. tritici TN09	TN09	4311	48240	24	1	21	3	88.12	9.78	73.7	77.1	93.1	97.3	99	2297.14	1701.32	29	481	2560	4016	4352	53.29	39.46	0.67	11.16	59.38	93.16	100.95
DTX-incomp_TN09-B-G104-Map13	Z. tritici TN09	TN09	3855	44439	28	4	24	5	83.75	9.97	63.4	74.5	83.41	93.3	98.47	1985.12	1619.04	30	159	2326	3662	3849	51.49	42	0.78	4.12	60.34	94.99	99.84
DTX-incomp_TN09-B-G119-Map20	Z. tritici TN09	TN09	4256	43014	30	6	29	6	85.82	9.08	72.8	78.5	83.53	96.1	97.5	1483.24	1758.73	21	140	262	3620	4174	34.85	41.32	0.49	3.29	6.16	85.06	98.07
DTX-incomp_TN09-B-G152-Map5	Z. tritici TN09	TN09	5522	39069	12	6	11	7	88.38	10.87	71.2	72.9	94.5	96.1	98	3551.73	2600.38	152	166	5345	5418	5691	64.32	47.09	2.75	3.01	96.79	98.12	103.06
DTX-incomp_TN09-B-G164-Map4	Z. tritici TN09	TN09	5511	38594	12	5	12	5	94.92	2.29	89.6	95.1	95.75	96.5	96.9	3216.17	2278.3	43	1643	3779	5391	5493	58.36	41.34	0.78	29.81	68.57	97.82	99.67
DTX-incomp_TN09-B-G169-Map3	Z. tritici TN09	TN09	5438	49564	27	7	25	8	85.66	7.87	69.8	79	85.7	92.1	98.6	1982.56	2573.23	32	77	113	5348	5451	36.46	47.32	0.59	1.42	2.08	98.34	100.24
DTX-incomp_TN09-B-G194-Map6	Z. tritici TN09	TN09	7319	62674	22	6	19	6	91.91	9.04	70.28	88.5	96.3	96.8	100	3298.63	3092.95	27	102	3051	7290	7562	45.07	42.26	0.37	1.39	41.69	99.6	103.32
DTX-incomp_TN09-B-G29-Map3	Z. tritici TN09	TN09	3812	16970	25	1	25	1	80.38	10.87	61.9	73.1	77.4	87.5	99.6	678.8	1144.96	26	164	317	374	4147	17.81	30.04	0.68	4.3	8.32	9.81	108.79
DTX-incomp_TN09-B-G351-Map5	Z. tritici TN09	TN09	1382	3208	7	0	7	0	74.89	10.14	68.2	68.5	69.4	88.9	90.5	458.29	253.68	42	140	574	622	636	33.16	18.36	3.04	10.13	41.53	45.01	46.02
DTX-incomp_TN09-B-G42-Map10	Z. tritici TN09	TN09	2931	30485	20	5	18	6	83.45	10.7	68.3	70.5	85.53	92.7	98.2	1693.61	1258.2	54	235	1871.5	2914	3130	57.78	42.93	1.84	8.02	63.85	99.42	106.79
DTX-incomp_TN09-B-G420-Map3	Z. tritici TN09	TN09	2049	6574	4	3	4	3	96.97	2.81	92.8	97.9	98.15	98.8	98.8	1643.5	809.67	429	2047	2048	2049	2049	80.21	39.52	20.94	99.9	99.95	100	100
DTX-incomp_TN09-B-G72-Map4	Z. tritici TN09	TN09	3006	15464	14	3	13	4	83.53	11.93	60.7	79	81.8	93.8	98.6	1189.54	1281.92	127	130	756	2967	3009	39.57	42.65	4.22	4.32	25.15	98.7	100.1
DTX-incomp_TN09-B-G88-Map10_reversed	Z. tritici TN09	TN09	3982	14552	11	3	11	3	83.75	9.62	67.2	76.3	84.6	91.9	97.6	1322.91	1767.04	35	85	329	3968	4116	33.22	44.38	0.88	2.13	8.26	99.65	103.37
DTX-incomp_TN09-B-R16-Map3_reversed	Z. tritici TN09	TN09	2414	12686	17	3	16	3	85.22	8.62	69.78	84	85.8	89	98.5	792.88	1054.66	43	51	109.5	2221	2450	32.84	43.69	1.78	2.11	4.54	92	101.49
DTX-incomp_TN09-B-R166-Map16	Z. tritici TN09	TN09	6985	85585	24	11	24	11	91.6	8.45	70.2	88.5	95.55	97.7	100	3566.04	3423.8	29	98	3485	6981	7049	51.05	49.02	0.42	1.4	49.89	99.94	100.92
DTX-incomp_TN09-B-R172-Map3	Z. tritici TN09	TN09	3386	17209	8	3	7	4	86.6	10.63	69.4	79.8	84.6	97.6	98	2458.43	1340.24	305	807	3373	3385	3386	72.61	39.58	9.01	23.83	99.62	99.97	100
DTX-incomp_TN09-B-R185-Map4	Z. tritici TN09	TN09	4075	20740	8	5	8	5	84.74	9.73	74.1	77.3	81.85	96.3	96.4	2592.5	2023.52	127	162	4012	4073	4134	63.62	49.66	3.12	3.98	98.45	99.95	101.45
DTX-incomp_TN09-B-R195-Map3_reversed	Z. tritici TN09	TN09	1135	2530	3	1	3	1	79.2	11.36	70	70	75.7	91.9	91.9	843.33	268.65	606	606	789	1135	1135	74.3	23.67	53.39	53.39	69.52	100	100
DTX-incomp_TN09-B-R201-Map5_reversed	Z. tritici TN09	TN09	4032	20745	18	2	17	3	91.62	7.99	77.7	84.1	95.7	97.5	100	1220.29	1636.59	35	44	134	2740	4073	30.27	40.59	0.87	1.09	3.32	67.96	101.02
DTX-incomp_TN09-B-R223-Map5_reversed	Z. tritici TN09	TN09	4312	13175	10	2	9	2	88.9	9.43	77.3	78.9	90.5	97.1	100	1463.89	2056.67	42	108	125	3989	4314	33.95	47.7	0.97	2.5	2.9	92.51	100.05
DTX-incomp_TN09-B-R261-Map3	Z. tritici TN09	TN09	5378	21770	8	4	8	4	89.73	8.21	75.3	87.3	91.75	97.6	97.9	2721.25	2829.56	42	66	2737.5	5380	5423	50.6	52.61	0.78	1.23	50.9	100.04	100.84
DTX-incomp_TN09-B-R264-Map6	Z. tritici TN09	TN09	3701	41941	43	6	39	8	83.5	8.7	69.7	76.77	80.3	88	98.7	1075.41	1492.86	28	88	172	2145	3789	29.06	40.34	0.76	2.38	4.65	57.96	102.38
DTX-incomp_TN09-B-R280-Map5_reversed	Z. tritici TN09	TN09	4002	14090	17	2	17	2	83.73	10.32	65.7	76.7	79.2	95.5	97.9	828.82	1344.21	38	119	161	429	4002	20.71	33.59	0.95	2.97	4.02	10.72	100
DTX-incomp_TN09-B-R286-Map5	Z. tritici TN09	TN09	4184	43429	34	5	30	6	79.77	9.66	68.8	72.7	76.4	84.7	98.2	1447.63	1661.53	21	147	479.5	3233	4189	34.6	39.71	0.5	3.51	11.46	77.27	100.12
DTX-incomp_TN09-B-R304-Map3_reversed	Z. tritici TN09	TN09	4291	13280	10	1	9	2	90.17	9.01	76.2	82.7	94.7	98.1	98.8	1475.56	1956.4	39	90	162	3652	4291	34.39	45.59	0.91	2.1	3.78	85.11	100
DTX-incomp_TN09-B-R31-Map6	Z. tritici TN09	TN09	2576	10798	10	2	10	2	90.9	8.94	78.2	80	96	98.2	98.6	1079.8	941.46	73	184	1215.5	1372	2576	41.92	36.55	2.83	7.14	47.19	53.26	100
DTX-incomp_TN09-B-R316-Map7	Z. tritici TN09	TN09	4038	21928	13	4	12	4	88.14	10.65	71.4	77.72	93.75	97.7	98.9	1827.33	1921.84	36	134	705	4038	4191	45.25	47.59	0.89	3.32	17.46	100	103.79
DTX-incomp_TN09-B-R349-Map6	Z. tritici TN09	TN09	3570	28310	17	3	14	4	77.34	12.89	62.5	69	69.55	93.5	98.3	2023.29	1240.43	21	1347	2172.5	3524	3585	56.67	34.75	0.59	37.73	60.85	98.71	100.42
DTX-incomp_TN09-B-R42-Map4	Z. tritici TN09	TN09	3807	24178	16	4	15	4	83.87	8.4	63.9	79	84.4	88.2	97.4	1611.87	1593.71	27	115	685	3658	3830	42.34	41.86	0.71	3.02	17.99	96.09	100.6
DTX-incomp_TN09-B-R43-Map7	Z. tritici TN09	TN09	5437	41207	13	6	13	6	91.82	8.28	69.5	89.1	94.4	97.7	97.9	3169.77	2296.84	36	1547	2930	5410	5440	58.3	42.24	0.66	28.45	53.89	99.5	100.06
DTX-incomp_TN09-B-R57-Map4	Z. tritici TN09	TN09	2973	5666	6	1	6	1	90.82	14.24	62.1	93.2	96.25	98.3	98.8	944.33	1353.99	23	27	134	2375	2973	31.76	45.54	0.77	0.91	4.51	79.89	100
DTX-incomp_TN09-B-R58-Map11	Z. tritici TN09	TN09	3573	27389	28	1	25	3	83.15	10.77	61.2	74	81.9	93.8	96.4	1095.56	1287.31	21	133	433	1549	3544	30.66	36.03	0.59	3.72	12.12	43.35	99.19
DTX-incomp_TN09-B-R67-Map4_reversed	Z. tritici TN09	TN09	1341	3365	5	1	5	1	87.46	11.13	69	86.4	89.9	95.1	96.9	673	433.66	220	386	617	802	1340	50.19	32.34	16.41	28.78	46.01	59.81	99.93
DTX-incomp_TN09-B-R68-Map10	Z. tritici TN09	TN09	4325	21886	18	1	14	1	88.19	10.78	71.5	78.1	95.22	97.64	98.2	1563.29	1610.76	79	189	769	3070	4321	36.15	37.24	1.83	4.37	17.78	70.98	99.91
DTX-incomp_TN09-B-R7-Map4	Z. tritici TN09	TN09	3343	17259	8	5	8	5	89.37	9.01	75.4	86.9	91.85	97.1	97.4	2157.38	1670.46	122	167	3337.5	3370	3453	64.53	49.97	3.65	5	99.84	100.81	103.29
DTX-incomp_TN09-B-R99-Map3	Z. tritici TN09	TN09	869	5326	17	4	13	4	84.2	8.6	74.25	76.4	82.32	89.2	97.8	409.69	334.5	64	143	272	869	899	47.15	38.49	7.36	16.46	31.3	100	103.45
DXX-MITE_TN09-B-G241-Map6	Z. tritici TN09	TN09	349	5704	26	8	26	8	87.82	10.21	67.7	81.8	87.5	98.1	99.4	219.38	101.46	55	129	197	344	351	62.86	29.07	15.76	36.96	56.45	98.57	100.57
DXX-MITE_TN09-B-G243-Map4	Z. tritici TN09	TN09	349	4242	17	8	17	8	85.87	9.22	70.7	80.5	82.4	93	99.4	249.53	90.31	129	175	212	336	349	71.5	25.88	36.96	50.14	60.74	96.28	100
DXX-MITE_TN09-B-G261-Map3	Z. tritici TN09	TN09	458	4464	27	4	27	4	87.74	6.72	71.4	84.4	86.1	90.4	99.8	165.33	140.93	22	53	105	204	475	36.1	30.77	4.8	11.57	22.93	44.54	103.71
DXX-MITE_TN09-B-G274-Map4	Z. tritici TN09	TN09	629	3914	8	6	8	6	92.31	7.62	77.1	94.9	95.55	96.7	98.4	489.25	261.92	62	603	628	646	649	77.78	41.64	9.86	95.87	99.84	102.7	103.18
DXX-MITE_TN09-B-P14.16-Map3	Z. tritici TN09	TN09	703	2308	5	3	4	3	95.71	7.28	84.83	98.4	99.05	99.9	99.9	577	240.71	216	691	695	702	702	82.08	34.24	30.73	98.29	98.86	99.86	99.86
DXX-MITE_TN09-B-P16.14-Map4	Z. tritici TN09	TN09	502	2757	7	4	7	4	94.31	9.33	73.2	96.8	97.6	98.2	98.8	393.86	139.24	206	235	500	501	511	78.46	27.74	41.04	46.81	99.6	99.8	101.79
DXX-MITE_TN09-B-P17.13-Map3	Z. tritici TN09	TN09	706	3138	6	4	6	4	88.42	10.13	75.3	81.4	88.6	97.6	99	523	290.99	80	224	705.5	706	717	74.08	41.22	11.33	31.73	99.93	100	101.56
DXX-MITE_TN09-B-P24.7-Map6	Z. tritici TN09	TN09	347	4003	14	10	14	10	93.58	7.37	75.6	90.4	96.05	99.4	99.7	285.93	101.55	52	199	343	344	357	82.4	29.27	14.99	57.35	98.85	99.14	102.88
DXX-MITE_TN09-B-P39.36-Map4	Z. tritici TN09	TN09	501	4942	11	7	11	7	94.76	6.74	80.8	95.2	97.9	98.1	99.4	449.27	99.4	241	444	492	499	539	89.68	19.84	48.1	88.62	98.2	99.6	107.58
noCat_TN09-B-G311-Map20	Z. tritici TN09	TN09	753	2166	16	1	13	1	94.96	8.06	68.2	97	97	97	98.4	166.62	238.69	29	36	55	73	750	22.13	31.7	3.85	4.78	7.3	9.69	99.6
noCat_TN09-B-G73-Map20	Z. tritici TN09	TN09	5909	6873	4	1	4	1	83.98	13.53	68.9	76.3	85.1	96.8	96.8	1718.25	2801.37	21	323	474	5904	5904	29.08	47.41	0.36	5.47	8.02	99.92	99.92
noCat_TN09-B-R3-Map20	Z. tritici TN09	TN09	10399	135477	38	3	37	3	92.68	7.32	71.6	89.5	96.5	97.4	100	3661.54	3562.38	36	178	2518	6057	10356	35.21	34.26	0.35	1.71	24.21	58.25	99.59
noCat_TN09-B-R8-Map13	Z. tritici TN09	TN09	5582	106183	39	10	32	14	87.84	8.57	69	84	90.66	95	97.1	3318.22	2291.98	44	888	4311.5	5461	5636	59.44	41.06	0.79	15.91	77.24	97.83	100.97
RIX-comp_TN09-B-G168-Map18	Z. tritici TN09	TN09	5639	122301	52	18	50	18	88.75	8.69	77.7	79.7	94.85	96.9	98.9	2446.02	2503.01	171	215	506	5576	5602	43.38	44.39	3.03	3.81	8.97	98.88	99.34
RIX-comp_TN09-B-G192-Map3_reversed	Z. tritici TN09	TN09	6895	45455	14	5	12	5	79.66	11.42	66.5	73.5	77.45	93.8	98.2	3787.92	3042.86	58	201	3684.5	6894	6910	54.94	44.13	0.84	2.92	53.44	99.99	100.22
RIX-incomp_TN09-B-G128-Map3	Z. tritici TN09	TN09	4698	20227	10	1	10	1	90.88	9.13	77.3	78.3	96.35	96.9	97	2022.7	1591.7	78	513	1754	3136	4743	43.05	33.88	1.66	10.92	37.34	66.75	100.96
RIX-incomp_TN09-B-G156-Map7_reversed	Z. tritici TN09	TN09	8307	93837	40	9	36	10	84.84	10.32	63	75	84.15	95.34	98.4	2606.58	3560.93	23	410	488	8166	8386	31.38	42.87	0.28	4.94	5.87	98.3	100.95
RIX-incomp_TN09-B-G371-Map20	Z. tritici TN09	TN09	1574	1936	2	1	2	1	98.45	0.35	98.2	98.2	98.45	98.7	98.7	968	848.53	368	368	968	1568	1568	61.5	53.91	23.38	23.38	61.5	99.62	99.62
RIX-incomp_TN09-B-R96-Map7	Z. tritici TN09	TN09	7608	54612	25	4	24	4	94.01	5.58	73.4	94.6	95.5	96.7	97.9	2275.5	2708.31	53	811	955	4621	7567	29.91	35.6	0.7	10.66	12.55	60.74	99.46
RLX-comp_TN09-B-G144-Map20_reversed	Z. tritici TN09	TN09	6419	286190	102	29	97	30	88.94	13.1	56.3	89.3	96	97	99	2951.38	2671.51	30	478	1149	6307	6503	45.98	41.62	0.47	7.45	17.9	98.26	101.31
RLX-comp_TN09-B-G209-Map5_reversed	Z. tritici TN09	TN09	8464	95518	30	5	23	7	90.73	11.24	66.1	93.87	96.1	97.3	98.3	4167.61	3425.6	300	947	3510	8458	8462	49.24	40.47	3.54	11.19	41.47	99.93	99.98
RLX-comp_TN09-B-G222-Map3_reversed	Z. tritici TN09	TN09	12647	106414	21	5	17	6	83.72	14.03	57.3	68.8	88.7	96	97.6	6259.65	5726.63	96	178	4138	12602	12886	49.5	45.28	0.76	1.41	32.72	99.64	101.89
RLX-comp_TN09-B-P32.29-Map3	Z. tritici TN09	TN09	6963	133013	43	14	43	14	89.44	12.4	55.4	80	96.8	97.3	98.7	3093.33	3003.74	31	376	1918	6954	6969	44.43	43.14	0.45	5.4	27.55	99.87	100.09
RLX-comp_TN09-B-R19-Map20	Z. tritici TN09	TN09	6820	533449	123	61	108	71	90.66	11.6	55.2	94	95.7	96.2	97.6	4940.02	2765.8	21	2538	6798	6818	6837	72.43	40.55	0.31	37.21	99.68	99.97	100.25
RLX-comp_TN09-B-R225-Map7	Z. tritici TN09	TN09	6789	48267	19	3	19	3	84.66	12.04	67.4	71.2	88.4	96.3	98.3	2540.37	2701.69	85	225	1423	5366	6789	37.42	39.8	1.25	3.31	20.96	79.04	100
RLX-comp_TN09-B-R5-Map20_reversed	Z. tritici TN09	TN09	8276	181986	34	17	32	17	95.83	1.75	90.69	95.6	96.4	96.9	98.6	5687.06	3280.39	143	2645	8180.5	8259	8407	68.72	39.64	1.73	31.96	98.85	99.79	101.58
RLX-comp_TN09-B-R92-Map6	Z. tritici TN09	TN09	6889	61151	27	3	21	6	82.73	12.34	55.4	73.06	86.24	92.9	98.3	2911.95	2963.03	99	181	1332	6849	6897	42.27	43.01	1.44	2.63	19.34	99.42	100.12
RLX-incomp_TN09-B-G10-Map20	Z. tritici TN09	TN09	12477	48504	30	1	29	1	94.1	4.77	79.3	94.8	95.7	96.7	100	1677.14	3500.07	25	133	240	823	12308	13.44	28.05	0.2	1.07	1.92	6.6	98.65
RLX-incomp_TN09-B-G143-Map6	Z. tritici TN09	TN09	8353	9256	4	1	4	1	95.78	0.99	94.9	95.5	95.5	97.2	97.2	2314	4021.34	293	306	308.5	8346	8346	27.7	48.14	3.51	3.66	3.69	99.92	99.92
RLX-incomp_TN09-B-G161-Map3	Z. tritici TN09	TN09	6683	18871	26	1	23	1	79.76	11.8	57.2	71.5	82.3	88	97.6	820.48	1656.17	34	48	190	673	6687	12.28	24.78	0.51	0.72	2.84	10.07	100.06
RLX-incomp_TN09-B-G199-Map5	Z. tritici TN09	TN09	9774	86705	49	1	35	2	93.48	5.56	77.4	93.7	95.6	96.53	98.5	2478.03	2751.47	22	326	2180	3254	9800	25.35	28.15	0.23	3.34	22.3	33.29	100.27
RLX-incomp_TN09-B-G201-Map20_reversed	Z. tritici TN09	TN09	8293	87108	28	9	25	9	90.49	10.35	56.6	86.8	95.2	97.8	98.7	3484.32	3853.76	40	147	418	8275	8288	42.02	46.47	0.48	1.77	5.04	99.78	99.94
RLX-incomp_TN09-B-G214-Map7	Z. tritici TN09	TN09	8636	86090	28	5	27	5	96.59	2.06	87	96.3	97	97.4	98	3188.52	3033.33	155	849	2635	4045	8639	36.92	35.12	1.79	9.83	30.51	46.84	100.03
RLX-incomp_TN09-B-G225-Map6	Z. tritici TN09	TN09	13577	53893	13	2	13	2	93.09	6.06	82.1	93.8	96	96.9	97.5	4145.62	5103.49	58	237	1620	8314	13561	30.53	37.59	0.43	1.75	11.93	61.24	99.88
RLX-incomp_TN09-B-G227-Map4_reversed	Z. tritici TN09	TN09	14182	142665	49	3	32	4	93.14	4.71	79.13	92.11	95.02	96.4	97.8	4458.72	4935.03	24	582	2205.5	6958	14606	31.44	34.8	0.17	4.1	15.55	49.06	102.99
RLX-incomp_TN09-B-G26-Map20	Z. tritici TN09	TN09	15924	236545	77	1	69	1	87.46	13.88	53.2	82.8	95.2	96.7	98	3429.65	3498.96	42	112	1868	6922	15524	21.54	21.97	0.26	0.7	11.73	43.47	97.49
RLX-incomp_TN09-B-G58-Map8	Z. tritici TN09	TN09	6989	8437	5	1	5	1	88.98	6.9	79.8	85.2	88.4	95.7	95.8	1687.4	2987.94	38	147	273	988	6991	24.14	42.75	0.54	2.1	3.91	14.14	100.03
RLX-incomp_TN09-B-P5.23-Map11	Z. tritici TN09	TN09	6869	378557	85	40	76	44	95.86	2.71	77.7	95.9	96.5	96.9	97.7	5071.59	2544.74	52	3686	6794.5	6803	6856	73.83	37.05	0.76	53.66	98.92	99.04	99.81
RLX-incomp_TN09-B-R113-Map20_reversed	Z. tritici TN09	TN09	9522	110789	46	5	39	8	89.34	6.94	76.3	83.3	90.4	96.2	97.7	2840.74	3924.38	70	87	258	7095	9516	29.83	41.21	0.74	0.91	2.71	74.51	99.94
RLX-incomp_TN09-B-R20-Map20	Z. tritici TN09	TN09	7007	129160	55	10	50	14	88.58	11.84	55.9	86	94.35	96	97.9	2583.2	2976.94	23	137	665.5	6920	7013	36.87	42.49	0.33	1.96	9.5	98.76	100.09
RLX-incomp_TN09-B-R209-Map18	Z. tritici TN09	TN09	12337	86566	27	3	22	5	75.53	17.43	55.3	58.4	70.65	94.6	96.7	3934.82	5247.59	26	204	286.5	9792	12228	31.89	42.54	0.21	1.65	2.32	79.37	99.12
RLX-incomp_TN09-B-R240-Map3	Z. tritici TN09	TN09	4002	28447	17	2	13	2	70.04	13.01	57.29	63.46	67	67.7	100	2188.23	1322.17	219	1479	2440	2968	4003	54.68	33.04	5.47	36.96	60.97	74.16	100.02
RLX-incomp_TN09-B-R35-Map5	Z. tritici TN09	TN09	7104	39342	29	3	28	3	79.88	10.26	57	72.4	80.45	85.4	97.4	1407.21	2438.36	48	85	191	1540	7106	19.81	34.32	0.68	1.2	2.69	21.68	100.03
RLX-incomp_TN09-B-R60-Map20	Z. tritici TN09	TN09	8383	273592	57	23	48	26	90.31	10.07	57.5	88.73	93.15	97.4	98.1	5700.12	3363.33	34	1572	8352	8366	8377	68	40.12	0.41	18.75	99.63	99.8	99.93
RLX-incomp_TN09-B-R76-Map20_reversed	Z. tritici TN09	TN09	14471	552300	78	20	58	22	94.99	2.28	80	94.8	95.3	95.9	96.91	9528.95	5539.55	33	3796	13142.5	13922	14494	65.85	38.28	0.23	26.23	90.82	96.21	100.16
RXX-LARD_TN09-B-G228-Map4	Z. tritici TN09	TN09	11567	51054	26	4	25	4	91.07	6.93	81	84.7	89.7	100	100	2296.28	4316.67	33	52	72	875	11573	19.85	37.32	0.29	0.45	0.62	7.56	100.05
RXX-TRIM_TN09-B-G255-Map20	Z. tritici TN09	TN09	506	484	1	1	1	1	96.7	0	96.7	96.7	96.7	96.7	96.7	484	0	484	484	484	484	484	95.65	0	95.65	95.65	95.65	95.65	95.65
RXX-TRIM_TN09-B-G336-Map3	Z. tritici TN09	TN09	1442	5057	11	1	8	3	94.95	6.92	78.2	96.1	96.84	98.2	100	632.12	688.56	24	55	296	1458	1461	43.84	47.75	1.66	3.81	20.53	101.11	101.32
RXX-TRIM_TN09-B-R307-Map4	Z. tritici TN09	TN09	551	3970	8	6	8	6	90.89	5.29	84	86.9	90.85	96.2	96.7	496.25	125.74	187	529	538.5	552	562	90.06	22.82	33.94	96.01	97.73	100.18	102
DHX-incomp_UR95-B-G188-Map4	Z. tritici UR95	UR95	7453	10099	19	1	18	1	87.19	10.91	63.4	84.5	92.35	93.7	97.8	569.11	1721.24	43	79	167	171	7455	7.64	23.09	0.58	1.06	2.24	2.29	100.03
DHX-incomp_UR95-B-G207-Map4	Z. tritici UR95	UR95	10567	71533	17	4	16	4	90.49	7.42	75	81.5	94.9	96.2	96.7	4470.81	4638.01	30	103	3193.5	10737	10880	42.31	43.89	0.28	0.97	30.22	101.61	102.96
DHX-incomp_UR95-B-P17.0-Map9	Z. tritici UR95	UR95	13728	279133	51	11	46	13	87.71	13.77	58.1	81	95.65	96.3	100	6068.2	5827.47	38	743	3572	13651	13740	44.2	42.45	0.28	5.41	26.02	99.44	100.09
DHX-incomp_UR95-B-P58.0-Map3_reversed	Z. tritici UR95	UR95	13783	46026	13	3	12	3	78.45	19.15	57.6	58.6	82.88	97.2	97.5	3835.5	6026.93	55	60	518.5	13762	13801	27.83	43.73	0.4	0.44	3.76	99.85	100.13
DHX-incomp_UR95-B-R173-Map4_reversed	Z. tritici UR95	UR95	5501	40353	19	6	15	6	84.98	11.37	63.31	74.6	89.5	95.8	98.6	2690.2	2542.97	37	216	1125	5504	5630	48.9	46.23	0.67	3.93	20.45	100.05	102.35
DHX-incomp_UR95-B-R297-Map10	Z. tritici UR95	UR95	7663	29585	24	1	21	1	85.21	9.27	66.3	80.17	86	93.9	97.2	1408.81	2223.95	25	140	451	1206	7420	18.38	29.02	0.33	1.83	5.89	15.74	96.83
DMX-incomp_UR95-B-R121-Map14	Z. tritici UR95	UR95	11777	100102	32	4	29	6	85.36	11.66	60.1	76.1	88.3	95.8	97.4	3451.79	4654.55	26	201	777	3685	11997	29.31	39.52	0.22	1.71	6.6	31.29	101.87
DMX-incomp_UR95-B-R44-Map20	Z. tritici UR95	UR95	10928	103279	38	4	31	5	89.31	6.56	75	83.87	89.5	95.74	98.5	3331.58	4066.06	39	114	1252	6676	10970	30.49	37.21	0.36	1.04	11.46	61.09	100.38
DTX-comp_UR95-B-G104-Map3	Z. tritici UR95	UR95	4354	19791	14	3	12	3	83.81	13.43	66.8	71	85.22	97.5	98.1	1653.67	1953.91	39	70	258.5	4347	4354	37.98	44.88	0.9	1.61	5.94	99.84	100
DTX-comp_UR95-B-G121-Map3_reversed	Z. tritici UR95	UR95	4605	37838	19	4	18	4	86.9	11.41	69.2	74.72	88.1	98.2	98.6	2102.11	1883.43	44	253	1707.5	4299	4627	45.65	40.9	0.96	5.49	37.08	93.36	100.48
DTX-comp_UR95-B-G2-Map4_reversed	Z. tritici UR95	UR95	3388	9294	15	2	14	2	80.61	11.6	61.5	69.1	84.35	90.7	94	663.86	1184.62	43	43	172.5	513	3412	19.59	34.97	1.27	1.27	5.09	15.14	100.71
DTX-comp_UR95-B-G405-Map3	Z. tritici UR95	UR95	2200	8794	5	3	5	3	92.92	7.64	79.9	94	94.6	96.1	100	1758.8	758.79	445	1757	2191	2200	2201	79.95	34.49	20.23	79.86	99.59	100	100.05
DTX-comp_UR95-B-G418-Map3_reversed	Z. tritici UR95	UR95	2210	13331	7	5	6	6	88	10.72	77.2	77.3	88.91	97.8	97.9	2221.83	48.43	2181	2202	2210	2210	2318	100.54	2.19	98.69	99.64	100	100	104.89
DTX-comp_UR95-B-G420-Map4	Z. tritici UR95	UR95	2219	9041	6	4	6	4	88.78	12.74	70.2	74.7	96.55	97.3	97.4	1506.83	1093.26	31	162	2206	2218	2218	67.91	49.27	1.4	7.3	99.41	99.95	99.95
DTX-comp_UR95-B-G422-Map4_reversed	Z. tritici UR95	UR95	2211	21769	16	9	14	9	82.6	10.87	64.2	78.6	80.48	92	98.1	1554.93	970.81	23	245	2197	2211	2217	70.33	43.91	1.04	11.08	99.37	100	100.27
DTX-comp_UR95-B-G453-Map4_reversed	Z. tritici UR95	UR95	2934	38695	31	9	30	9	78.68	9.99	58.19	70.4	78.1	85.2	95.8	1289.83	1229.75	53	142	887	2890	2940	43.96	41.91	1.81	4.84	30.23	98.5	100.2
DTX-comp_UR95-B-G46-Map5	Z. tritici UR95	UR95	3471	28370	13	6	13	6	83.23	10.71	69	74.5	85	92.9	98.8	2182.31	1530.21	41	428	3272	3471	3498	62.87	44.09	1.18	12.33	94.27	100	100.78
DTX-comp_UR95-B-G56-Map3_reversed	Z. tritici UR95	UR95	3348	13431	14	2	10	3	84.7	9.88	71.3	77.5	82.2	94.95	98.5	1344.1	1422.64	28	305	812.5	3348	3366	40.15	42.49	0.84	9.11	24.27	100	100.54
DTX-comp_UR95-B-G62-Map3_reversed	Z. tritici UR95	UR95	3203	16359	7	5	7	5	84.83	13.24	69.7	70.1	89.8	97.4	98.5	2337	1445.33	200	245	3200	3203	3228	72.96	45.12	6.24	7.65	99.91	100	100.78
DTX-comp_UR95-B-G71-Map3	Z. tritici UR95	UR95	3492	18542	13	5	13	5	81.67	10.26	68.8	76.3	77.8	87.8	97.7	1426.31	1708.5	48	107	216	3491	3529	40.85	48.93	1.37	3.06	6.19	99.97	101.06
DTX-comp_UR95-B-G94-Map4	Z. tritici UR95	UR95	3555	22302	12	5	10	5	83.37	13.42	56.2	75.8	81.19	97.1	98	2230.2	1577.79	33	131	2851.5	3551	3568	62.73	44.38	0.93	3.68	80.21	99.89	100.37
DTX-comp_UR95-B-P56.2-Map4	Z. tritici UR95	UR95	2192	6881	8	3	8	3	79.81	12.39	65.7	67.2	81.85	96.2	96.2	860.12	1100.65	23	24	123	2188	2189	39.24	50.21	1.05	1.09	5.61	99.82	99.86
DTX-comp_UR95-B-R228-Map10	Z. tritici UR95	UR95	3406	32206	30	1	21	4	85.69	11.93	64.78	73.1	92.23	97.6	98.7	1535.29	1371.66	29	228	970	2944	3415	45.08	40.27	0.85	6.69	28.48	86.44	100.26
DTX-comp_UR95-B-R229-Map8_reversed	Z. tritici UR95	UR95	4498	57977	47	2	38	5	85.96	7.95	70.4	77.35	88.2	92.7	98.5	1526.61	1806.48	30	122	354	3774	4555	33.94	40.16	0.67	2.71	7.87	83.9	101.27
DTX-comp_UR95-B-R24-Map11_reversed	Z. tritici UR95	UR95	3397	24501	19	4	16	5	87.73	8.04	67.5	87.2	90	92.8	98	1531.31	1568.48	27	108	764.5	3378	3405	45.08	46.17	0.79	3.18	22.51	99.44	100.24
DTX-comp_UR95-B-R251-Map8	Z. tritici UR95	UR95	3166	31669	20	3	16	6	88.64	9.77	76.1	78.4	92.45	97.9	98.5	1979.31	1226.02	41	851	2366.5	3166	3200	62.52	38.72	1.3	26.88	74.75	100	101.07
DTX-comp_UR95-B-R254-Map3_reversed	Z. tritici UR95	UR95	3589	17937	5	5	5	5	92.64	8.35	83.3	83.7	98.4	98.9	98.9	3587.4	5.32	3578	3589	3589	3590	3591	99.96	0.15	99.69	100	100	100.03	100.06
DTX-comp_UR95-B-R351-Map4_reversed	Z. tritici UR95	UR95	2981	27609	24	3	16	8	84.48	9.83	72.19	76.35	80.53	94.2	100	1725.56	1357.45	46	309	2232.5	2981	2998	57.89	45.54	1.54	10.37	74.89	100	100.57
DTX-comp_UR95-B-R366-Map3_reversed	Z. tritici UR95	UR95	3505	14044	5	4	5	4	83.18	14.37	72.4	72.5	73.2	97.8	100	2808.8	1497.18	131	3450	3453	3505	3505	80.14	42.72	3.74	98.43	98.52	100	100
DTX-comp_UR95-B-R48-Map12_reversed	Z. tritici UR95	UR95	2194	14688	20	2	17	3	86.32	12.8	63.4	74	94.6	97.2	98	864	885.59	23	32	311	1681	2198	39.38	40.36	1.05	1.46	14.18	76.62	100.18
DTX-comp_UR95-B-R52-Map7	Z. tritici UR95	UR95	3190	35370	16	11	16	11	87.19	10.98	71.7	78.3	85.65	98.8	99.7	2210.62	1496.42	36	88	3188.5	3190	3242	69.3	46.91	1.13	2.76	99.95	100	101.63
DTX-comp_UR95-B-R62-Map14	Z. tritici UR95	UR95	2215	21819	22	5	18	7	88.71	8.91	68.4	82.1	93.89	95.3	96.5	1212.17	918.46	31	408	958.5	2194	2218	54.73	41.47	1.4	18.42	43.27	99.05	100.14
DTX-comp_UR95-B-R70-Map4_reversed	Z. tritici UR95	UR95	3434	19776	10	4	9	5	81.42	12.11	63.8	73.9	77.47	96.1	97.1	2197.33	1573.02	57	239	3356	3383	3434	63.99	45.81	1.66	6.96	97.73	98.51	100
DTX-incomp_UR95-B-G110-Map3	Z. tritici UR95	UR95	4196	38559	29	7	28	8	79.88	8.95	67.8	73.1	76.75	86	98.5	1377.11	1833.64	32	105	154	4022	4201	32.82	43.7	0.76	2.5	3.67	95.85	100.12
DTX-incomp_UR95-B-G133-Map8	Z. tritici UR95	UR95	5512	50083	18	8	18	8	93.19	3.44	85.7	89.5	94.55	96	96.8	2782.39	2586.34	38	49	2701	5393	5478	50.48	46.92	0.69	0.89	49	97.84	99.38
DTX-incomp_UR95-B-G196-Map10	Z. tritici UR95	UR95	6963	82053	28	9	27	9	90.06	9.67	69.5	83.5	94.8	96.8	100	3039	3160	30	96	1118	6957	7126	43.64	45.38	0.43	1.38	16.06	99.91	102.34
DTX-incomp_UR95-B-G223-Map3	Z. tritici UR95	UR95	7929	23833	4	3	4	3	97.45	1.27	95.7	97.4	97.75	98.6	98.6	5958.25	3940.83	47	7928	7928.5	7929	7929	75.15	49.7	0.59	99.99	99.99	100	100
DTX-incomp_UR95-B-G326-Map5	Z. tritici UR95	UR95	873	4573	7	5	7	5	92.09	6.8	83.9	84.8	96.3	98.3	98.6	653.29	379.59	55	143	871	872	893	74.83	43.48	6.3	16.38	99.77	99.89	102.29
DTX-incomp_UR95-B-G365-Map3_reversed	Z. tritici UR95	UR95	1547	20528	26	6	23	8	79.74	9.7	64.9	70.9	79.2	84.1	98.6	892.52	648.77	48	122	1187	1539	1568	57.69	41.94	3.1	7.89	76.73	99.48	101.36
DTX-incomp_UR95-B-G432-Map3	Z. tritici UR95	UR95	2566	9216	15	3	15	3	80.57	12.14	55.9	75.6	80.9	86.7	97.5	614.4	1010.25	60	124	134	173	2566	23.94	39.37	2.34	4.83	5.22	6.74	100
DTX-incomp_UR95-B-G60-Map7	Z. tritici UR95	UR95	3136	33225	32	7	28	10	86.2	6.63	75.4	81.42	85.7	90.58	97.7	1186.61	1513.63	32	74	91	3167	3212	37.84	48.27	1.02	2.36	2.9	100.99	102.42
DTX-incomp_UR95-B-G91-Map4	Z. tritici UR95	UR95	4008	26828	27	4	26	5	80.2	10	60.8	73.5	77.15	94.1	96.9	1031.85	1626.94	25	119	168.5	376	4007	25.74	40.59	0.62	2.97	4.2	9.38	99.98
DTX-incomp_UR95-B-P8.47-Map3_reversed	Z. tritici UR95	UR95	3587	11972	9	3	8	3	87.4	9.2	74.8	83.7	87.96	98.6	98.9	1496.5	1731.89	94	256	381.5	3584	3586	41.72	48.28	2.62	7.14	10.64	99.92	99.97
DTX-incomp_UR95-B-R118-Map4	Z. tritici UR95	UR95	3513	17654	15	3	12	3	74.73	14.07	59.9	67.4	68.47	93.4	95.8	1471.17	1337.91	212	357	1230.5	3527	3550	41.88	38.08	6.03	10.16	35.03	100.4	101.05
DTX-incomp_UR95-B-R120-Map3_reversed	Z. tritici UR95	UR95	2147	20662	25	4	24	4	81.23	6.87	71.6	77.6	81.9	85.1	97.7	860.92	969.97	38	67	68	1901	2188	40.1	45.18	1.77	3.12	3.17	88.54	101.91
DTX-incomp_UR95-B-R199-Map9	Z. tritici UR95	UR95	3619	39635	52	5	46	8	85.2	8.51	72.5	78.3	82.95	93.9	100	861.63	1345.8	31	71	129	1136	3622	23.81	37.19	0.86	1.96	3.56	31.39	100.08
DTX-incomp_UR95-B-R222-Map3_reversed	Z. tritici UR95	UR95	3215	40688	22	5	18	6	77.85	10.27	63.8	70.65	72.05	83.31	97.2	2260.44	1183.02	115	1446	2705.5	3215	3260	70.31	36.8	3.58	44.98	84.15	100	101.4
DTX-incomp_UR95-B-R247-Map7	Z. tritici UR95	UR95	5368	16165	7	2	7	2	97.24	1.09	95.4	96.6	97.6	98.2	98.5	2309.29	2399.3	130	471	570	5236	5383	43.02	44.7	2.42	8.77	10.62	97.54	100.28
DTX-incomp_UR95-B-R259-Map3_reversed	Z. tritici UR95	UR95	2177	15096	10	6	10	6	85.28	9.04	76	77.2	82.6	95.1	100	1509.6	1007.53	26	89	2133	2175	2182	69.34	46.28	1.19	4.09	97.98	99.91	100.23
DTX-incomp_UR95-B-R262-Map3	Z. tritici UR95	UR95	2840	13716	20	3	17	4	78.65	9.03	68.4	72.7	75	84.1	100	806.82	1183.31	44	72	159	666	2901	28.41	41.67	1.55	2.54	5.6	23.45	102.15
DTX-incomp_UR95-B-R269-Map9	Z. tritici UR95	UR95	5466	42801	28	4	23	4	88.72	12.36	57.96	83.7	95	97	100	1860.96	2333.7	27	31	79	4957	5462	34.05	42.69	0.49	0.57	1.45	90.69	99.93
DTX-incomp_UR95-B-R283-Map4	Z. tritici UR95	UR95	2121	11550	13	4	11	5	83.23	10.49	63.7	78	81.9	92.64	96	1050	1042.27	23	92	454	2121	2152	49.5	49.14	1.08	4.34	21.4	100	101.46
DTX-incomp_UR95-B-R343-Map11	Z. tritici UR95	UR95	5441	43726	13	7	13	7	89.86	8.23	70.7	85.1	93.3	95.1	97.8	3363.54	2574.61	47	117	5397	5434	5495	61.82	47.32	0.86	2.15	99.19	99.87	100.99
DTX-incomp_UR95-B-R35-Map13	Z. tritici UR95	UR95	3705	49561	43	8	37	9	87.33	9.01	73.2	80.2	85.3	97.1	98.45	1339.49	1542.04	29	75	517	3295	3751	36.15	41.62	0.78	2.02	13.95	88.93	101.24
DTX-incomp_UR95-B-R37-Map13	Z. tritici UR95	UR95	5533	44590	27	2	23	6	87.22	8.24	70.9	79	91.3	93	97	1938.7	2418.98	43	77	133	5347	5478	35.04	43.72	0.78	1.39	2.4	96.64	99.01
DTX-incomp_UR95-B-R381-Map4	Z. tritici UR95	UR95	5374	16952	8	2	7	2	88.56	10.13	74.2	75.5	94	97.7	98.1	2421.71	2465.94	42	177	1211	5403	5407	45.06	45.89	0.78	3.29	22.53	100.54	100.61
DTX-incomp_UR95-B-R42-Map4	Z. tritici UR95	UR95	1726	3822	11	1	11	1	83.94	11.06	73	74.7	75.5	96.4	98.8	347.45	471.68	36	175	232	389	1726	20.13	27.33	2.09	10.14	13.44	22.54	100
DTX-incomp_UR95-B-R51-Map6	Z. tritici UR95	UR95	2579	11698	17	2	17	2	84.64	12.74	58	75.2	82.5	97.2	98.7	688.12	818.14	21	125	349	977	2580	26.68	31.72	0.81	4.85	13.53	37.88	100.04
DTX-incomp_UR95-B-R78-Map4_reversed	Z. tritici UR95	UR95	2911	3334	5	1	5	1	71.64	15.32	61.1	61.1	61.6	79.1	95.3	666.8	1258.11	40	49	65	269	2911	22.91	43.22	1.37	1.68	2.23	9.24	100
DXX-MITE_UR95-B-G250-Map4	Z. tritici UR95	UR95	361	2151	7	5	7	5	96.51	6.76	81.3	97.6	99.2	99.7	100	307.29	92.41	118	251	357	361	361	85.12	25.6	32.69	69.53	98.89	100	100
DXX-MITE_UR95-B-G271-Map3	Z. tritici UR95	UR95	494	6411	27	7	25	9	87.45	7.71	75.5	81.5	85	96.9	98.6	256.44	192.38	32	101	118	490	514	51.91	38.94	6.48	20.45	23.89	99.19	104.05
DXX-MITE_UR95-B-G276-Map3	Z. tritici UR95	UR95	488	1574	5	3	4	3	94.33	8.39	81.83	97.3	97.95	99.6	99.6	393.5	187.67	112	487	487	488	488	80.64	38.46	22.95	99.8	99.8	100	100
DXX-MITE_UR95-B-G294-Map8	Z. tritici UR95	UR95	569	4619	9	8	9	8	95.89	2.18	91.9	94.4	95.5	97.7	98.2	513.22	167.75	66	566	568	570	578	90.2	29.48	11.6	99.47	99.82	100.18	101.58
DXX-MITE_UR95-B-R152-Map5	Z. tritici UR95	UR95	628	3909	9	5	9	5	93.81	6.05	83.7	90.9	97.1	97.8	99	434.33	257.21	43	264	623	628	648	69.16	40.96	6.85	42.04	99.2	100	103.18
DXX-MITE_UR95-B-R302-Map3	Z. tritici UR95	UR95	629	4533	12	3	12	3	84.01	10.15	74.1	77	78.8	99.2	99.8	377.75	239.34	37	192	427	629	629	60.06	38.05	5.88	30.52	67.89	100	100
noCat_UR95-B-G144-Map20	Z. tritici UR95	UR95	5797	38322	20	1	13	1	83.37	6.15	73.3	77.9	83	89.5	93.1	2947.85	2767.52	24	59	5263	5398	5519	50.85	47.74	0.41	1.02	90.79	93.12	95.2
noCat_UR95-B-G150-Map12	Z. tritici UR95	UR95	5644	36434	11	5	10	5	85.51	6.16	75.3	81.7	87.6	89.3	94	3643.4	2482.81	80	128	5161.5	5392	5560	64.55	43.99	1.42	2.27	91.45	95.54	98.51
noCat_UR95-B-R72-Map20	Z. tritici UR95	UR95	874	59994	78	19	77	19	91.97	2.19	79.8	91.1	92.4	93.1	95.2	785.69	131.33	46	779	803	836	942	89.9	15.03	5.26	89.13	91.88	95.65	107.78
noCat_UR95-B-R80-Map16	Z. tritici UR95	UR95	818	41166	59	17	58	17	92.23	3.13	83	90.8	92.05	94.5	98.8	709.76	187.54	71	743	768.5	802	891	86.77	22.93	8.68	90.83	93.95	98.04	108.92
RIX-comp_UR95-B-G140-Map20	Z. tritici UR95	UR95	5870	291287	92	29	89	31	94.76	6.28	75.2	96.2	97.2	97.7	100	3273	2411.73	31	440	4192	5584	5768	55.76	41.09	0.53	7.5	71.41	95.13	98.26
RIX-comp_UR95-B-G199-Map4	Z. tritici UR95	UR95	9632	357584	113	1	101	2	95.28	3.48	75.8	95.3	95.9	96.5	99.1	3600.05	2316.04	28	1513	4057	5572	9774	37.38	24.05	0.29	15.71	42.12	57.85	101.47
RIX-comp_UR95-B-G204-Map8	Z. tritici UR95	UR95	8321	264042	152	23	142	23	86.66	6.89	71.2	80.4	88.2	93.4	98.9	1859.51	3118.85	23	102	214	1669	8435	22.35	37.48	0.28	1.23	2.57	20.06	101.37
RIX-comp_UR95-B-G93-Map3	Z. tritici UR95	UR95	4426	8392	4	1	4	1	96.15	0.24	96	96	96.05	96.5	96.5	2098	1594.16	956	1179	1506.5	4423	4423	47.4	36.02	21.6	26.64	34.04	99.93	99.93
RIX-comp_UR95-B-R338-Map11	Z. tritici UR95	UR95	3997	10530	10	1	10	1	85.93	10.86	70.6	77.1	87.15	95.5	98.8	1053	1261.02	103	155	564	1580	3856	26.34	31.55	2.58	3.88	14.11	39.53	96.47
RIX-comp_UR95-B-R397-Map3_reversed	Z. tritici UR95	UR95	4738	18345	7	3	6	3	82.63	12.85	72.6	73.1	75.94	98.2	100	3057.5	2112.28	217	581	4035.5	4738	4738	64.53	44.58	4.58	12.26	85.17	100	100
RIX-incomp_UR95-B-R360-Map3	Z. tritici UR95	UR95	4383	32767	14	5	13	6	79.81	10.76	63.8	69.2	82.7	85.8	97.3	2520.54	1922.98	63	211	2343	4371	4387	57.51	43.87	1.44	4.81	53.46	99.73	100.09
RIX-incomp_UR95-B-R8-Map3	Z. tritici UR95	UR95	838	50124	69	23	67	23	89.19	3.74	77.3	87.7	89.2	90.9	100	748.12	185.05	45	755	783	835	931	89.27	22.08	5.37	90.1	93.44	99.64	111.1
RLX-comp_UR95-B-G170-Map13_reversed	Z. tritici UR95	UR95	6372	105422	53	12	51	12	90.87	9.43	56.7	91.2	94.2	95.5	98	2072.45	2659.3	34	108	276	4916	6527	32.52	41.73	0.53	1.69	4.33	77.15	102.43
RLX-comp_UR95-B-G186-Map20	Z. tritici UR95	UR95	6843	213656	68	17	61	19	92.73	5.24	76.71	92.7	94.8	95.6	96.9	3503.15	2712.6	42	787	3428	6800	6827	51.19	39.64	0.61	11.5	50.09	99.37	99.77
RLX-comp_UR95-B-P22.36-Map3_reversed	Z. tritici UR95	UR95	6964	93225	28	9	26	9	92.78	7.93	68.8	94	95.55	96.8	98.2	3585.58	3016.86	77	396	3484.5	6954	6964	51.49	43.32	1.11	5.69	50.04	99.86	100
RLX-comp_UR95-B-R158-Map6	Z. tritici UR95	UR95	6718	34414	15	3	14	4	81.88	16.61	55.7	68	84.55	97	97.7	2458.14	3182.91	23	65	283.5	6538	6744	36.59	47.38	0.34	0.97	4.22	97.32	100.39
RLX-comp_UR95-B-R38-Map20_reversed	Z. tritici UR95	UR95	12761	97971	34	1	31	1	92.67	6.57	73.3	89.2	95.8	96.8	97.6	3161.16	3677.18	63	278	1709	4069	12687	24.77	28.82	0.49	2.18	13.39	31.89	99.42
RLX-incomp_UR95-B-G138-Map4	Z. tritici UR95	UR95	4893	29323	16	3	14	4	90.99	10.07	70.09	83.54	95.75	97.4	99.2	2094.5	2127.86	194	225	922.5	4799	5072	42.81	43.49	3.96	4.6	18.85	98.08	103.66
RLX-incomp_UR95-B-G159-Map20_reversed	Z. tritici UR95	UR95	6409	392434	100	49	92	54	91.28	8.29	72.4	91.8	95.45	96.2	97	4265.59	2761.49	21	318	6356	6361	6727	66.56	43.09	0.33	4.96	99.17	99.25	104.96
RLX-incomp_UR95-B-G178-Map3	Z. tritici UR95	UR95	6324	18565	14	1	11	1	87.83	12.11	57.4	80.8	92.9	95.29	98	1687.73	2089.31	21	57	976	2825	6325	26.69	33.04	0.33	0.9	15.43	44.67	100.02
RLX-incomp_UR95-B-G212-Map10	Z. tritici UR95	UR95	9515	160833	70	7	61	8	90.07	6.22	77.7	83.6	92.8	95.3	97.5	2637.26	3565.59	87	170	587	5007	9686	27.72	37.47	0.91	1.79	6.17	52.62	101.8
RLX-incomp_UR95-B-G215-Map5	Z. tritici UR95	UR95	8466	77660	17	5	13	9	87.16	12.9	54	76.5	94.06	94.8	96.4	5973.85	3951.81	125	434	8463	8476	8659	70.56	46.68	1.48	5.13	99.96	100.12	102.28
RLX-incomp_UR95-B-G229-Map3_reversed	Z. tritici UR95	UR95	9721	65620	32	3	31	3	87.06	9.08	72.2	76.2	91.7	94.6	100	2116.77	3240.47	25	194	224	3750	9940	21.78	33.33	0.26	2	2.3	38.58	102.25
RLX-incomp_UR95-B-G31-Map20	Z. tritici UR95	UR95	10393	30274	20	2	19	2	86.86	10.93	60.2	80.6	89.7	95	97.6	1593.37	3206.73	37	61	252	1157	10565	15.33	30.85	0.36	0.59	2.42	11.13	101.65
RLX-incomp_UR95-B-G403-Map3	Z. tritici UR95	UR95	2068	7259	9	1	7	1	91.19	11.42	67.05	86.66	96.1	97.1	100	1037.57	566.22	233	601	1088	1170	2068	50.17	27.38	11.27	29.06	52.61	56.58	100
RLX-incomp_UR95-B-G72-Map3	Z. tritici UR95	UR95	3814	3994	2	1	2	1	97.05	3.75	94.4	94.4	97.05	99.7	99.7	1997	2423.96	283	283	1997	3711	3711	52.36	63.55	7.42	7.42	52.36	97.3	97.3
RLX-incomp_UR95-B-P15.42-Map3_reversed	Z. tritici UR95	UR95	4621	7789	14	1	14	1	87.75	8.28	68.2	81.7	90.7	93.2	100	556.36	1193.16	25	75	110	672	4574	12.04	25.82	0.54	1.62	2.38	14.54	98.98
RLX-incomp_UR95-B-P21.37-Map12	Z. tritici UR95	UR95	6832	281746	62	27	58	30	93.79	4.58	70.3	93.8	95.1	95.8	96.8	4857.69	2584.64	82	2321	6796	6805	6836	71.1	37.83	1.2	33.97	99.47	99.6	100.06
RLX-incomp_UR95-B-R10-Map16	Z. tritici UR95	UR95	13932	112929	18	5	17	5	92.96	4.77	80.9	93.4	95.1	95.6	96.6	6642.88	6253.53	51	155	5615	13738	14026	47.68	44.89	0.37	1.11	40.3	98.61	100.67
RLX-incomp_UR95-B-R119-Map3_reversed	Z. tritici UR95	UR95	2012	4558	4	2	4	2	96.88	0.55	96.1	97	97	97.4	97.4	1139.5	1043.59	58	433	1232.5	2035	2035	56.64	51.87	2.88	21.52	61.26	101.14	101.14
RLX-incomp_UR95-B-R176-Map20_reversed	Z. tritici UR95	UR95	8274	121945	18	13	16	14	95.89	0.94	94.6	95.1	95.95	96.8	97	7622.88	2083.78	46	8253	8257.5	8264	8309	92.13	25.18	0.56	99.75	99.8	99.88	100.42
RLX-incomp_UR95-B-R19-Map20_reversed	Z. tritici UR95	UR95	14025	316104	70	9	48	11	93.56	4.44	77.18	94	95.1	95.8	96.7	6587.94	5511.23	86	1293	4447	13302	13967	46.97	39.3	0.61	9.22	31.71	94.84	99.59
RLX-incomp_UR95-B-R221-Map3	Z. tritici UR95	UR95	2896	49039	31	13	30	13	71.91	10.02	56.29	66.3	69.65	77.9	100	1634.63	1206.61	46	254	1184.5	2890	2902	56.44	41.66	1.59	8.77	40.9	99.79	100.21
RLX-incomp_UR95-B-R33-Map20	Z. tritici UR95	UR95	6975	355864	107	33	92	37	93.67	5.19	70.9	93.7	95.65	96.5	100	3943.9	2918.05	24	900	4004	6922	7007	56.54	41.84	0.34	12.9	57.41	99.24	100.46
RLX-incomp_UR95-B-R372-Map3	Z. tritici UR95	UR95	7120	49156	47	3	36	4	80.16	10.88	58.6	68.65	81.5	89.1	100	1365.44	2320.63	29	58	115	1641	7187	19.18	32.59	0.41	0.81	1.62	23.05	100.94
RLX-incomp_UR95-B-R398-Map3_reversed	Z. tritici UR95	UR95	6713	57833	28	3	21	5	74.34	14.63	57.5	63.9	68.6	90.9	100	2753.95	3046.89	29	127	437	6374	6737	41.02	45.39	0.43	1.89	6.51	94.95	100.36
RLX-incomp_UR95-B-R403-Map3	Z. tritici UR95	UR95	2839	11538	6	3	5	4	82.34	13.45	70.7	73.49	73.9	93.6	100	2307.6	1146.19	258	2766	2836	2839	2839	81.28	40.37	9.09	97.43	99.89	100	100
RLX-incomp_UR95-B-R404-Map3	Z. tritici UR95	UR95	1532	6241	7	2	7	2	89.13	9.5	76.5	80.5	93.8	97.8	100	891.57	643.28	100	272	1262	1518	1532	58.2	41.99	6.53	17.75	82.38	99.09	100
RLX-incomp_UR95-B-R45-Map20	Z. tritici UR95	UR95	8438	123780	33	8	28	12	92.22	4.39	82.7	90.1	93.6	95.9	97.4	4420.71	3829.01	29	153	5614.5	8355	8523	52.39	45.38	0.34	1.81	66.54	99.02	101.01
RLX-incomp_UR95-B-R65-Map3	Z. tritici UR95	UR95	4001	23604	21	2	17	2	79.28	15.12	61.4	67	70.3	95.8	99.3	1388.47	1496.12	85	421	749	3280	4001	34.7	37.39	2.12	10.52	18.72	81.98	100
RXX_UR95-B-G416-Map7	Z. tritici UR95	UR95	2464	8305	7	1	7	1	88.73	8.94	77.1	77.3	94.2	96	96.7	1186.43	935.54	170	328	868	2225	2424	48.15	37.97	6.9	13.31	35.23	90.3	98.38
RXX-TRIM_UR95-B-G296-Map5	Z. tritici UR95	UR95	643	4751	11	5	11	5	87.38	5.64	80.9	82.4	85.7	93.9	95.8	431.91	265.5	30	79	589	646	657	67.17	41.29	4.67	12.29	91.6	100.47	102.18
DHX-incomp_YEQ92-B-G198-Map5	Z. tritici YEQ92	YEQ92	5277	7185	13	1	12	1	91.93	6.82	78.3	92.9	95.72	96.3	96.3	598.75	1477.6	27	63	95.5	363	5251	11.35	28	0.51	1.19	1.81	6.88	99.51
DHX-incomp_YEQ92-B-G290-Map3	Z. tritici YEQ92	YEQ92	8701	69864	14	6	13	6	96.49	2.33	89.7	96.3	96.6	97.6	100	5374.15	3950.58	38	640	8032	8699	8880	61.76	45.4	0.44	7.36	92.31	99.98	102.06
DHX-incomp_YEQ92-B-G295-Map3	Z. tritici YEQ92	YEQ92	10868	12250	9	1	9	1	82.17	9.86	72	74.8	75.5	91.4	96.2	1361.11	3561.31	34	49	174	350	10852	12.52	32.77	0.31	0.45	1.6	3.22	99.85
DHX-incomp_YEQ92-B-R112-Map3	Z. tritici YEQ92	YEQ92	4385	32569	17	5	17	5	76.97	11.42	56	69	73.6	85.8	95.7	1915.82	2035.16	44	204	423	4211	4646	43.69	46.41	1	4.65	9.65	96.03	105.95
DHX-incomp_YEQ92-B-R196-Map4_reversed	Z. tritici YEQ92	YEQ92	7874	22824	25	2	24	2	86.38	9.07	67.3	84.8	88.9	92	98.3	951	2212.2	21	98	135	373	7889	12.08	28.09	0.27	1.24	1.71	4.74	100.19
DHX-incomp_YEQ92-B-R242-Map3_reversed	Z. tritici YEQ92	YEQ92	3493	9416	10	2	8	2	90.97	6.39	80.3	87.58	92.22	97.9	98.3	1177	1485.35	27	140	479.5	3474	3494	33.7	42.52	0.77	4.01	13.73	99.46	100.03
DHX-incomp_YEQ92-B-R275-Map9_reversed	Z. tritici YEQ92	YEQ92	8488	95522	69	3	53	5	83.68	9.92	57.9	75	85.1	93.3	100	1802.42	3111.72	25	62	125	1348	8444	21.23	36.66	0.29	0.73	1.47	15.88	99.48
DHX-incomp_YEQ92-B-R399-Map3	Z. tritici YEQ92	YEQ92	2271	15800	36	2	35	2	78.06	7.71	64.8	73.3	77.4	80.3	97.4	451.43	576.14	26	108	237	553	2272	19.88	25.37	1.14	4.76	10.44	24.35	100.04
DMX-incomp_YEQ92-B-G304-Map11	Z. tritici YEQ92	YEQ92	12150	21314	16	1	14	1	91.03	8.55	75.4	89.3	94.34	96.6	98.6	1522.57	3592.03	28	62	93.5	211	12148	12.53	29.56	0.23	0.51	0.77	1.74	99.98
DMX-incomp_YEQ92-B-R116-Map20	Z. tritici YEQ92	YEQ92	12001	100727	52	3	42	4	87.58	7.51	67.5	82.2	87.81	95.13	97.7	2398.86	4036.82	29	56	175.5	2391	11968	19.99	33.64	0.24	0.47	1.46	19.92	99.73
DTX-comp_YEQ92-B-P10.28-Map4	Z. tritici YEQ92	YEQ92	2211	17739	11	6	10	7	90.07	7.51	77.7	86.7	90.55	96.2	98.9	1773.9	760.19	98	1400	2201	2211	2214	80.23	34.38	4.43	63.32	99.55	100	100.14
DTX-comp_YEQ92-B-P3.34-Map4_reversed	Z. tritici YEQ92	YEQ92	2978	29958	23	7	17	9	84.09	10.42	67.42	75.8	84.58	93.1	97.8	1763.24	1384.61	29	251	2960	2978	3004	59.21	46.49	0.97	8.43	99.4	100	100.87
DTX-comp_YEQ92-B-P6.32-Map9	Z. tritici YEQ92	YEQ92	2193	23055	20	9	19	10	88.83	8.02	71.9	83.2	87	96.4	98.2	1213.42	1057.42	38	55	2167	2190	2193	55.33	48.22	1.73	2.51	98.81	99.86	100
DTX-comp_YEQ92-B-P8.30-Map4	Z. tritici YEQ92	YEQ92	2201	41498	28	14	24	17	84.67	7.62	65.1	80.9	85.7	86.6	99.4	1729.08	853.25	21	1913	2197	2201	2222	78.56	38.77	0.95	86.92	99.82	100	100.95
DTX-comp_YEQ92-B-R117-Map6	Z. tritici YEQ92	YEQ92	4531	47195	56	4	54	4	80.12	9.14	57.4	76	80.2	84.2	97.2	873.98	1497.76	23	96	127	461	4599	19.29	33.06	0.51	2.12	2.8	10.17	101.5
DTX-comp_YEQ92-B-R121-Map3	Z. tritici YEQ92	YEQ92	3404	24629	16	3	15	3	82.62	11.34	69.1	71.2	83.3	91.7	98.2	1641.93	1406.72	29	35	2314	2556	3404	48.24	41.33	0.85	1.03	67.98	75.09	100
DTX-comp_YEQ92-B-R153-Map7	Z. tritici YEQ92	YEQ92	3567	40611	23	7	20	9	86.25	11.28	69.5	74.5	89.97	97.1	98.3	2030.55	1544	40	337	2541.5	3564	3580	56.93	43.29	1.12	9.45	71.25	99.92	100.36
DTX-comp_YEQ92-B-R308-Map3_reversed	Z. tritici YEQ92	YEQ92	3399	24917	18	5	17	5	85.65	9.43	70.8	77.5	90.6	92.4	98.3	1465.71	1550.01	28	68	942	3374	3693	43.12	45.6	0.82	2	27.71	99.26	108.65
DTX-comp_YEQ92-B-R86-Map8_reversed	Z. tritici YEQ92	YEQ92	2212	14971	18	4	18	4	85.94	10.35	71	73.3	88.5	95.7	96.9	831.72	917.65	23	51	360	2013	2212	37.6	41.49	1.04	2.31	16.27	91	100
DTX-comp_YEQ92-B-R97-Map6	Z. tritici YEQ92	YEQ92	2202	23510	14	7	13	8	85.83	10.96	71	76.7	92.3	95.5	97.4	1808.46	645.54	172	1577	2169	2198	2239	82.13	29.32	7.81	71.62	98.5	99.82	101.68
DTX-incomp_YEQ92-B-G133-Map10	Z. tritici YEQ92	YEQ92	3742	5025	16	1	16	1	84.49	11.46	65.2	76.9	84.2	96.3	100	314.06	898.22	27	32	86.5	167	3674	8.39	24	0.72	0.86	2.31	4.46	98.18
DTX-incomp_YEQ92-B-G153-Map7	Z. tritici YEQ92	YEQ92	4191	24569	18	5	18	5	82.28	10.36	65.2	76.8	79.15	96.5	97.6	1364.94	1776.3	83	175	296.5	4087	4194	32.57	42.38	1.98	4.18	7.07	97.52	100.07
DTX-incomp_YEQ92-B-G157-Map13	Z. tritici YEQ92	YEQ92	5585	45303	26	8	26	8	86.7	7.73	72	80.3	86.1	95.3	96.3	1742.42	2522.19	37	57	119	5416	5599	31.2	45.16	0.66	1.02	2.13	96.97	100.25
DTX-incomp_YEQ92-B-G165-Map3	Z. tritici YEQ92	YEQ92	4109	22289	21	5	21	5	81.7	7.73	71	76.9	78.6	84.8	98.5	1061.38	1728.12	46	106	131	353	4127	25.83	42.06	1.12	2.58	3.19	8.59	100.44
DTX-incomp_YEQ92-B-G209-Map4	Z. tritici YEQ92	YEQ92	5451	26951	11	4	9	4	92.15	6.4	80.6	88.1	95.56	97.4	97.5	2994.56	2798.31	43	48	5077	5395	5463	54.94	51.34	0.79	0.88	93.14	98.97	100.22
DTX-incomp_YEQ92-B-G226-Map6	Z. tritici YEQ92	YEQ92	5431	33128	17	6	17	6	89.4	8.39	75.7	85.5	89.8	96.9	100	1948.71	2614.11	40	50	105	5362	5413	35.88	48.13	0.74	0.92	1.93	98.73	99.67
DTX-incomp_YEQ92-B-G247-Map3	Z. tritici YEQ92	YEQ92	6743	54305	52	5	51	5	83.58	8.09	72.3	76.6	82.5	90.8	98.1	1064.8	2064.38	25	85	150	842	6897	15.79	30.62	0.37	1.26	2.22	12.49	102.28
DTX-incomp_YEQ92-B-G415-Map3	Z. tritici YEQ92	YEQ92	870	6339	20	4	18	4	85.12	9.67	72.2	75.1	84.65	96.1	98.3	352.17	332.03	42	65	271	762	886	40.48	38.16	4.83	7.47	31.15	87.59	101.84
DTX-incomp_YEQ92-B-G423-Map3_reversed	Z. tritici YEQ92	YEQ92	1071	1504	5	1	5	1	85.9	10.98	74.6	75	86.4	96.3	97.2	300.8	434.57	43	44	155	193	1069	28.09	40.58	4.01	4.11	14.47	18.02	99.81
DTX-incomp_YEQ92-B-G547-Map3_reversed	Z. tritici YEQ92	YEQ92	2189	10008	13	3	13	3	81.51	11.98	68.7	71.2	75.7	91.4	98.4	769.85	843.65	36	289	411	760	2207	35.17	38.54	1.64	13.2	18.78	34.72	100.82
DTX-incomp_YEQ92-B-G554-Map5_reversed	Z. tritici YEQ92	YEQ92	2231	21129	29	7	28	7	86.22	8.78	68.2	79.5	85.94	94.4	97.7	754.61	1005.22	33	63	68.5	2187	2356	33.82	45.06	1.48	2.82	3.07	98.03	105.6
DTX-incomp_YEQ92-B-G561-Map4	Z. tritici YEQ92	YEQ92	2322	4478	4	1	4	1	84.25	13.61	70.5	75.2	83.65	99.2	99.2	1119.5	1193.81	38	150	1059	2322	2322	48.21	51.41	1.64	6.46	45.61	100	100
DTX-incomp_YEQ92-B-P24.10-Map5	Z. tritici YEQ92	YEQ92	5395	38788	12	6	11	7	89.36	8.43	76.9	81.6	90	97.2	98	3526.18	2527.07	52	553	5323	5352	5370	65.36	46.84	0.96	10.25	98.67	99.2	99.54
DTX-incomp_YEQ92-B-P31.10-Map3	Z. tritici YEQ92	YEQ92	5423	19064	5	3	5	3	95.5	5.38	86	96.4	98.3	98.3	98.5	3812.8	2403.21	28	2785	5406	5421	5424	70.31	44.32	0.52	51.36	99.69	99.96	100.02
DTX-incomp_YEQ92-B-P32.9-Map4	Z. tritici YEQ92	YEQ92	2932	32450	18	8	18	8	85.2	10	67.2	82.3	86.75	94.8	96.5	1802.78	1233.63	23	468	2356	2915	2925	61.49	42.07	0.78	15.96	80.35	99.42	99.76
DTX-incomp_YEQ92-B-P34.7-Map3	Z. tritici YEQ92	YEQ92	1992	11120	10	4	10	4	82.18	10.29	70.9	73.1	79.05	92.6	98.5	1112	855.64	83	237	1169.5	1991	1992	55.82	42.95	4.17	11.9	58.71	99.95	100
DTX-incomp_YEQ92-B-P36.5-Map4	Z. tritici YEQ92	YEQ92	3697	23553	21	5	20	6	85.45	9.11	69.7	78.8	84.8	93.8	98.3	1177.65	1684.18	31	69	121.5	3666	3699	31.85	45.56	0.84	1.87	3.29	99.16	100.05
DTX-incomp_YEQ92-B-P40.1-Map3	Z. tritici YEQ92	YEQ92	825	1853	4	2	4	2	89.02	9.85	77.7	84.6	89.2	100	100	463.25	417.32	87	117	470.5	825	825	56.15	50.58	10.55	14.18	57.03	100	100
DTX-incomp_YEQ92-B-P42.37-Map3_reversed	Z. tritici YEQ92	YEQ92	2186	15339	8	7	8	7	85.6	11.7	68.2	76.9	87.6	97.4	98.2	1917.38	762.64	30	2185	2185.5	2193	2197	87.71	34.89	1.37	99.95	99.98	100.32	100.5
DTX-incomp_YEQ92-B-R123-Map4	Z. tritici YEQ92	YEQ92	5250	26756	8	1	7	2	89.62	7.87	74.5	86.2	93.2	96.4	96.5	3822.29	1941.37	738	1659	4507	5366	5585	72.81	36.98	14.06	31.6	85.85	102.21	106.38
DTX-incomp_YEQ92-B-R124-Map8	Z. tritici YEQ92	YEQ92	5402	39198	20	6	19	7	92.01	4.53	82.1	88.6	93.8	94.9	97.3	2063.05	2605.05	27	46	64	5387	5457	38.19	48.22	0.5	0.85	1.18	99.72	101.02
DTX-incomp_YEQ92-B-R127-Map5	Z. tritici YEQ92	YEQ92	2772	20422	38	2	36	2	85.56	8.76	69.6	79.1	85.65	91	100	567.28	756.96	35	121	330.5	600	2771	20.46	27.31	1.26	4.37	11.92	21.65	99.96
DTX-incomp_YEQ92-B-R128-Map5	Z. tritici YEQ92	YEQ92	5424	21940	11	1	9	3	89.05	6.93	80.4	82.8	88.98	96.1	97.9	2437.78	2608.29	31	65	1196	5394	5449	44.94	48.09	0.57	1.2	22.05	99.45	100.46
DTX-incomp_YEQ92-B-R141-Map6	Z. tritici YEQ92	YEQ92	6968	30509	18	3	18	3	83.9	10.92	70	75.2	81	96.5	98.2	1694.94	2776.05	29	71	263	1172	7049	24.32	39.84	0.42	1.02	3.77	16.82	101.16
DTX-incomp_YEQ92-B-R160-Map16	Z. tritici YEQ92	YEQ92	4239	34007	21	4	21	4	83.53	10.89	65.2	74.6	80.2	94.2	97.1	1619.38	1698.56	57	178	485	3364	4249	38.2	40.07	1.34	4.2	11.44	79.36	100.24
DTX-incomp_YEQ92-B-R161-Map10	Z. tritici YEQ92	YEQ92	6933	29357	30	1	29	1	85.43	8.66	73.1	78	84.9	92	98.6	1012.72	1658.48	27	98	198	1278	6932	14.61	23.92	0.39	1.41	2.86	18.43	99.99
DTX-incomp_YEQ92-B-R202-Map3	Z. tritici YEQ92	YEQ92	799	2277	3	2	3	2	92.03	9.84	80.7	80.7	97	98.4	98.4	759	68.42	680	680	798	799	799	94.99	8.56	85.11	85.11	99.87	100	100
DTX-incomp_YEQ92-B-R220-Map8	Z. tritici YEQ92	YEQ92	7753	33372	17	2	17	2	90.86	8.82	68.9	82.7	95.9	97.6	98.3	1963.06	2629.21	32	75	575	3211	7751	25.32	33.91	0.41	0.97	7.42	41.42	99.97
DTX-incomp_YEQ92-B-R221-Map3	Z. tritici YEQ92	YEQ92	7782	29547	23	2	23	2	81.74	7.87	70.5	75	83.3	85.7	98.4	1284.65	2508.43	47	55	107	1090	7796	16.51	32.23	0.6	0.71	1.37	14.01	100.18
DTX-incomp_YEQ92-B-R223-Map7	Z. tritici YEQ92	YEQ92	3702	24711	28	4	25	4	88.39	8.89	77.2	80.5	86.3	98	99.4	988.44	1388.31	50	74	196	1013	3789	26.7	37.5	1.35	2	5.29	27.36	102.35
DTX-incomp_YEQ92-B-R227-Map6_reversed	Z. tritici YEQ92	YEQ92	2274	27652	32	4	27	7	77.53	9.48	61.9	69.8	77.6	83.9	93.3	1024.15	864.04	32	388	646	2177	2276	45.04	38	1.41	17.06	28.41	95.73	100.09
DTX-incomp_YEQ92-B-R234-Map3	Z. tritici YEQ92	YEQ92	2191	7964	7	2	7	2	82.79	12.57	70.2	70.6	84.8	95.8	100	1137.71	1042.25	29	41	1383	2191	2202	51.93	47.57	1.32	1.87	63.12	100	100.5
DTX-incomp_YEQ92-B-R270-Map3	Z. tritici YEQ92	YEQ92	3152	9341	14	2	14	2	87.31	8.24	75.2	81.1	89.55	93.2	100	667.21	1140.52	36	43	47.5	1219	3152	21.17	36.18	1.14	1.36	1.51	38.67	100
DTX-incomp_YEQ92-B-R278-Map4	Z. tritici YEQ92	YEQ92	1304	12903	24	5	24	5	78.98	8.47	68.7	73.5	74.5	83.3	99.3	537.62	419.93	71	227	435	611	1314	41.23	32.2	5.44	17.41	33.36	46.86	100.77
DTX-incomp_YEQ92-B-R287-Map3_reversed	Z. tritici YEQ92	YEQ92	4264	34265	19	5	19	5	78.86	9.59	59.1	72.2	77.7	86.1	100	1803.42	1808.52	56	143	874	4264	4283	42.29	42.41	1.31	3.35	20.5	100	100.45
DTX-incomp_YEQ92-B-R30-Map3	Z. tritici YEQ92	YEQ92	1660	15684	14	7	13	8	80.91	11.42	66.7	74	75.48	94.8	97.7	1206.46	626.89	23	672	1597	1647	1660	72.68	37.76	1.39	40.48	96.2	99.22	100
DTX-incomp_YEQ92-B-R303-Map3	Z. tritici YEQ92	YEQ92	2291	28966	24	7	22	8	80.56	10.66	67.6	69.7	82.27	86.8	98.6	1316.64	945.69	29	199	1344.5	2272	2296	57.47	41.28	1.27	8.69	58.69	99.17	100.22
DTX-incomp_YEQ92-B-R316-Map5	Z. tritici YEQ92	YEQ92	4058	30792	35	4	35	4	78.53	8.54	70.7	72.7	76.8	79.4	99.3	879.77	1446.89	24	114	213	400	4057	21.68	35.66	0.59	2.81	5.25	9.86	99.98
DTX-incomp_YEQ92-B-R388-Map3	Z. tritici YEQ92	YEQ92	3452	23181	21	5	19	6	85.63	10	71.4	76.1	88.2	94.8	100	1220.05	1570.17	29	37	86	3410	3489	35.34	45.49	0.84	1.07	2.49	98.78	101.07
DTX-incomp_YEQ92-B-R414-Map3_reversed	Z. tritici YEQ92	YEQ92	2118	11265	8	4	8	4	88.86	10.41	69.9	81.3	93.25	97.6	98	1408.12	930.96	59	655	1988	2118	2144	66.48	43.95	2.79	30.93	93.86	100	101.23
DTX-incomp_YEQ92-B-R472-Map3	Z. tritici YEQ92	YEQ92	1827	11489	10	5	9	6	84.52	11.6	69.4	76.6	79.02	97.5	98.5	1276.56	797.7	34	328	1785	1827	1827	69.87	43.66	1.86	17.95	97.7	100	100
DTX-incomp_YEQ92-B-R474-Map3	Z. tritici YEQ92	YEQ92	1302	4263	9	1	8	1	81.48	12.6	67.25	72	78.95	97.3	100	532.88	455.44	82	164	432	1025	1302	40.93	34.98	6.3	12.6	33.18	78.73	100
DTX-incomp_YEQ92-B-R61-Map4	Z. tritici YEQ92	YEQ92	4644	30419	23	4	22	4	72.7	13.09	56.8	61.4	70.65	84.4	98.5	1382.68	1900.79	28	86	257.5	3381	4662	29.77	40.93	0.6	1.85	5.54	72.8	100.39
DTX-incomp_YEQ92-B-R63-Map3	Z. tritici YEQ92	YEQ92	1646	18292	17	6	17	6	77.54	10.99	67.7	70	72.1	81.2	98.5	1076	577.4	210	534	1393	1642	1646	65.37	35.08	12.76	32.44	84.63	99.76	100
DTX-incomp_YEQ92-B-R68-Map11	Z. tritici YEQ92	YEQ92	5544	120840	53	6	44	10	86.56	8.84	68.8	79.5	88.7	93.6	97.6	2746.36	2191.62	39	527	2476.5	5229	5750	49.54	39.53	0.7	9.51	44.67	94.32	103.72
DTX-incomp_YEQ92-B-R75-Map3	Z. tritici YEQ92	YEQ92	2773	18410	13	2	10	4	80.24	13.01	60.6	70.5	77.22	90.6	100	1841	1246.67	32	90	2557	2764	2773	66.39	44.96	1.15	3.25	92.21	99.68	100
DTX-incomp_YEQ92-B-R77-Map3	Z. tritici YEQ92	YEQ92	1339	5926	9	4	9	4	87.71	11.27	60.3	86.7	90.2	92.5	98.7	658.44	660.87	53	53	315	1339	1373	49.17	49.36	3.96	3.96	23.53	100	102.54
DXX-MITE_YEQ92-B-P14.25-Map3	Z. tritici YEQ92	YEQ92	361	1520	6	4	6	4	94.82	5.39	88.5	88.6	96.05	99.7	100	253.33	161.03	42	49	354	360	361	70.18	44.61	11.63	13.57	98.06	99.72	100
DXX-MITE_YEQ92-B-P18.22-Map3	Z. tritici YEQ92	YEQ92	625	3077	6	4	6	4	93.35	6.83	83.3	86	97.05	98.1	98.6	512.83	231.25	59	477	629	639	644	82.05	37	9.44	76.32	100.64	102.24	103.04
DXX-MITE_YEQ92-B-P22.18-Map5	Z. tritici YEQ92	YEQ92	492	4462	10	7	10	7	88.31	9.05	79.2	79.7	88.2	96.5	98.2	446.2	100.37	169	437	487.5	491	502	90.69	20.4	34.35	88.82	99.09	99.8	102.03
DXX-MITE_YEQ92-B-P27.14-Map3	Z. tritici YEQ92	YEQ92	401	2275	10	4	9	4	92.24	6.88	79.3	90.9	93.8	97	99.2	252.78	183.25	44	66	392	400	440	63.04	45.7	10.97	16.46	97.76	99.75	109.73
DXX-MITE_YEQ92-B-P30.11-Map8	Z. tritici YEQ92	YEQ92	576	4592	10	7	9	8	95.43	1.39	92.9	94.2	95.8	96.3	97	510.22	172.25	51	566	568	570	572	88.58	29.9	8.85	98.26	98.61	98.96	99.31
DXX-MITE_YEQ92-B-P35.6-Map3	Z. tritici YEQ92	YEQ92	341	3584	11	5	11	5	84.22	11.19	71	75.6	79.3	99.7	100	325.82	12.52	306	317	320	340	341	95.55	3.67	89.74	92.96	93.84	99.71	100
DXX-MITE_YEQ92-B-P38.3-Map4	Z. tritici YEQ92	YEQ92	416	6353	16	15	16	15	82.24	10.77	67.9	74.5	80.35	96.1	99	397.06	79.71	99	413	416	423	425	95.45	19.16	23.8	99.28	100	101.68	102.16
DXX-MITE_YEQ92-B-P9.29-Map4	Z. tritici YEQ92	YEQ92	494	1959	4	4	4	4	98.3	0.74	97.4	98	98.4	99	99	489.75	4.35	486	486	489.5	494	494	99.14	0.88	98.38	98.38	99.09	100	100
DXX-MITE_YEQ92-B-R251-Map3	Z. tritici YEQ92	YEQ92	457	2986	16	3	16	3	87.76	5.98	77.8	84.8	86.15	93.2	100	186.62	168.24	45	72	104.5	379	457	40.84	36.81	9.85	15.75	22.87	82.93	100
DXX-MITE_YEQ92-B-R44-Map3	Z. tritici YEQ92	YEQ92	497	3302	10	6	10	6	89.49	7.79	81.2	81.6	89.95	99	99.6	330.2	211.33	49	49	480.5	490	498	66.44	42.52	9.86	9.86	96.68	98.59	100.2
noCat_YEQ92-B-G320-Map16	Z. tritici YEQ92	YEQ92	13796	288439	33	14	30	17	94.66	7.57	64.9	96.2	96.98	97.6	98.1	9614.63	5721.61	36	3212	13658	13728	13779	69.69	41.47	0.26	23.28	99	99.51	99.88
RIX-comp_YEQ92-B-G155-Map4	Z. tritici YEQ92	YEQ92	4441	19598	11	1	11	1	92.54	5.65	80	93.4	94.8	95.3	96.2	1781.64	1254.87	67	1262	1330	3072	4305	40.12	28.26	1.51	28.42	29.95	69.17	96.94
RIX-comp_YEQ92-B-G182-Map3	Z. tritici YEQ92	YEQ92	7565	18258	9	2	9	2	86.87	10.48	73	76.6	95.2	95.4	96.5	2028.67	3318.75	62	108	415	780	7935	26.82	43.87	0.82	1.43	5.49	10.31	104.89
RIX-comp_YEQ92-B-G2-Map20_reversed	Z. tritici YEQ92	YEQ92	9634	69927	58	3	52	3	93.8	4.01	75.4	93.7	94.95	95.8	98.1	1344.75	2087.26	48	493	936	1249	9780	13.96	21.67	0.5	5.12	9.72	12.96	101.52
RIX-comp_YEQ92-B-G229-Map20_reversed	Z. tritici YEQ92	YEQ92	5632	282058	143	36	140	36	87.14	8.34	77.2	79.9	81.35	96.6	98.2	2014.7	2409.84	28	208	225	5563	5592	35.77	42.79	0.5	3.69	4	98.77	99.29
RIX-comp_YEQ92-B-G3-Map20_reversed	Z. tritici YEQ92	YEQ92	10193	21342	9	2	9	2	84.71	10.17	72.3	75	90	92.2	96.2	2371.33	4279.34	34	197	295	393	9928	23.26	41.98	0.33	1.93	2.89	3.86	97.4
RIX-comp_YEQ92-B-P15.12-Map3	Z. tritici YEQ92	YEQ92	6514	16818	7	2	6	2	80.32	16.71	55.93	68.3	81.65	94.4	100	2803	3077.25	96	199	1750.5	6508	6514	43.03	47.24	1.47	3.05	26.87	99.91	100
RIX-comp_YEQ92-B-P29.12-Map3	Z. tritici YEQ92	YEQ92	6573	29621	13	3	11	3	82.35	13.1	67	69	82	96.4	100	2692.82	2765.56	72	180	2038	6567	6575	40.97	42.07	1.1	2.74	31.01	99.91	100.03
RIX-comp_YEQ92-B-R135-Map5_reversed	Z. tritici YEQ92	YEQ92	7954	38532	19	1	18	1	89.48	9.26	66.5	90.4	92.8	95.1	96.3	2140.89	2250.01	166	813	990	2336	7838	26.92	28.29	2.09	10.22	12.45	29.37	98.54
RIX-comp_YEQ92-B-R449-Map3_reversed	Z. tritici YEQ92	YEQ92	5555	12148	4	2	4	2	81.25	20	57.4	72.2	83.95	99.7	99.7	3037	2908.49	404	635	3094.5	5555	5555	54.67	52.36	7.27	11.43	55.71	100	100
RIX-incomp_YEQ92-B-G15-Map4	Z. tritici YEQ92	YEQ92	12396	245303	50	9	36	12	90.87	7.55	64.76	92.13	93.95	94.6	97.2	6815.58	5367.62	23	1063	8660.5	12195	12466	54.98	43.3	0.19	8.58	69.87	98.38	100.56
RIX-incomp_YEQ92-B-G269-Map16	Z. tritici YEQ92	YEQ92	7879	57682	48	1	47	1	93.89	5.55	76.5	93.6	95.2	96.7	100	1227.28	2182.94	24	30	221	1087	7613	15.58	27.71	0.3	0.38	2.8	13.8	96.62
RIX-incomp_YEQ92-B-G289-Map3	Z. tritici YEQ92	YEQ92	11639	170045	87	5	69	6	88.11	6.64	70.6	83.5	89.4	93.51	97.3	2465.1	4323.43	50	61	158	1216	12080	21.18	37.15	0.43	0.52	1.36	10.45	103.79
RLX-comp_YEQ92-B-G211-Map20_reversed	Z. tritici YEQ92	YEQ92	6426	145887	83	12	75	15	82.73	14.43	55.6	67.7	91.1	95.3	97.5	1945.16	2532.36	29	154	347	4679	6375	30.27	39.41	0.45	2.4	5.4	72.81	99.21
RLX-comp_YEQ92-B-G242-Map4	Z. tritici YEQ92	YEQ92	6720	35780	19	4	16	4	78.92	16.03	56.6	66.18	77.5	96.6	97	2236.25	2878.67	40	109	337	6695	6718	33.28	42.84	0.6	1.62	5.01	99.63	99.97
RLX-comp_YEQ92-B-G253-Map20	Z. tritici YEQ92	YEQ92	6843	430316	101	38	89	46	92.44	7.23	58.8	93.7	94.8	95.8	97.5	4835.78	2502.51	57	2503	6778	6810	6830	70.67	36.57	0.83	36.58	99.05	99.52	99.81
RLX-comp_YEQ92-B-G276-Map8_reversed	Z. tritici YEQ92	YEQ92	8468	100883	27	8	27	8	81.41	16.76	55.8	66.3	94.8	96.2	96.7	3736.41	3470.3	59	378	2874	8456	8465	44.12	40.98	0.7	4.46	33.94	99.86	99.96
RLX-comp_YEQ92-B-G317-Map3	Z. tritici YEQ92	YEQ92	13370	40761	8	3	8	3	93.54	6.2	83.1	94.3	96.65	97.8	97.8	5095.12	6842.98	28	166	223.5	13359	13368	38.11	51.18	0.21	1.24	1.67	99.92	99.99
RLX-comp_YEQ92-B-P37.4-Map3	Z. tritici YEQ92	YEQ92	6795	87093	31	7	25	9	84.69	8.6	70	79.7	85	91.17	98.7	3483.72	3048.62	41	418	1494	6794	6835	51.27	44.87	0.6	6.15	21.99	99.99	100.59
RLX-comp_YEQ92-B-R131-Map3_reversed	Z. tritici YEQ92	YEQ92	6931	21057	7	2	6	3	92.19	5.51	83.6	90	91.63	97.9	98.4	3509.5	3750.81	21	117	3518	6931	6952	50.63	54.12	0.3	1.69	50.76	100	100.3
RLX-comp_YEQ92-B-R155-Map9	Z. tritici YEQ92	YEQ92	12667	90592	14	6	14	6	87.29	11.7	69.5	72	93	97.1	98.5	6470.86	6268.7	89	198	6436.5	12579	12835	51.08	49.49	0.7	1.56	50.81	99.31	101.33
RLX-comp_YEQ92-B-R199-Map3_reversed	Z. tritici YEQ92	YEQ92	4802	27002	8	5	8	5	90.97	5.91	82.5	89	91.25	98.1	98.3	3375.25	2169.61	59	2602	4802	4885	4887	70.29	45.18	1.23	54.19	100	101.73	101.77
RLX-comp_YEQ92-B-R34-Map20	Z. tritici YEQ92	YEQ92	13597	380618	96	9	76	12	93.97	4.79	77	94.1	96.05	96.7	97.7	5009.49	5065.43	21	489	2777.5	9756	13590	36.84	37.25	0.15	3.6	20.43	71.75	99.95
RLX-comp_YEQ92-B-R374-Map4_reversed	Z. tritici YEQ92	YEQ92	5042	26289	48	2	32	2	80.68	7.07	73	76.4	78.18	81.79	98.5	821.53	1389.89	51	205	225	339	5042	16.29	27.57	1.01	4.07	4.46	6.72	100
RLX-incomp_YEQ92-B-G111-Map20	Z. tritici YEQ92	YEQ92	5415	12628	17	1	17	1	80.01	15.46	58.3	60.9	84.5	94.4	98.6	742.82	1476.75	29	46	90	196	5393	13.72	27.27	0.54	0.85	1.66	3.62	99.59
RLX-incomp_YEQ92-B-G194-Map20_reversed	Z. tritici YEQ92	YEQ92	6888	321735	82	29	75	33	94.33	7.28	56.2	95.1	96.3	96.9	97.7	4289.8	2722.74	31	1385	5053	6812	6875	62.28	39.53	0.45	20.11	73.36	98.9	99.81
RLX-incomp_YEQ92-B-G22-Map20	Z. tritici YEQ92	YEQ92	14120	273827	55	7	47	9	94.15	3.45	80.7	93.88	95.4	95.9	97.9	5826.11	5086.9	31	310	5001	9734	13922	41.26	36.03	0.22	2.2	35.42	68.94	98.6
RLX-incomp_YEQ92-B-G241-Map20_reversed	Z. tritici YEQ92	YEQ92	5578	30003	34	1	34	1	87.79	11.14	57.3	85.7	90.6	95.4	97.9	882.44	1670.23	25	86	151	230	5307	15.82	29.94	0.45	1.54	2.71	4.12	95.14
RLX-incomp_YEQ92-B-G244-Map16	Z. tritici YEQ92	YEQ92	6372	133326	76	16	76	16	79.44	10.25	68.2	71.5	76.6	87.5	97.6	1754.29	2550.05	55	121	263	2167	6387	27.53	40.02	0.86	1.9	4.13	34.01	100.24
RLX-incomp_YEQ92-B-G284-Map4	Z. tritici YEQ92	YEQ92	8803	11109	3	1	3	1	94.7	2.72	91.6	91.6	95.8	96.7	96.7	3703	4490.62	270	270	2054	8785	8785	42.07	51.01	3.07	3.07	23.33	99.8	99.8
RLX-incomp_YEQ92-B-G291-Map9_reversed	Z. tritici YEQ92	YEQ92	8280	75548	17	9	17	9	89.68	13.3	56.1	85.9	96.4	97.6	98	4444	4192.06	21	105	8273	8276	8288	53.67	50.63	0.25	1.27	99.92	99.95	100.1
RLX-incomp_YEQ92-B-G296-Map6	Z. tritici YEQ92	YEQ92	9510	100630	90	5	84	5	88.26	6.57	77.2	81.2	89.3	94.4	97.5	1197.98	2561.31	22	87	138	588	9505	12.6	26.93	0.23	0.91	1.45	6.18	99.95
RLX-incomp_YEQ92-B-G303-Map4	Z. tritici YEQ92	YEQ92	12165	70663	13	5	13	5	81.67	13.51	57.4	70.5	85.7	94.3	97.3	5435.62	5863.62	39	315	704	12091	12206	44.68	48.2	0.32	2.59	5.79	99.39	100.34
RLX-incomp_YEQ92-B-G312-Map10_reversed	Z. tritici YEQ92	YEQ92	14571	167244	35	3	28	4	92.15	6.28	77.8	91.5	95.48	96.9	97.5	5973.25	5464.78	29	1878	3785.5	12301	14731	40.99	37.5	0.2	12.89	25.98	84.42	101.1
RLX-incomp_YEQ92-B-G318-Map9	Z. tritici YEQ92	YEQ92	13559	152687	31	6	25	8	79.07	11.25	58.6	69.4	82	85.2	96.4	6107.48	5827.97	29	302	4114	13214	13332	45.04	42.98	0.21	2.23	30.34	97.46	98.33
RLX-incomp_YEQ92-B-P25.16-Map6_reversed	Z. tritici YEQ92	YEQ92	6964	147363	50	14	46	15	89.42	13.19	56.22	84.1	96.41	97	98.3	3354.61	2870.04	22	377	2432.5	6952	6963	48.17	41.21	0.32	5.41	34.93	99.83	99.99
RLX-incomp_YEQ92-B-P4.33-Map11_reversed	Z. tritici YEQ92	YEQ92	8286	130220	25	14	24	15	93.07	8.14	67.4	92.5	96.4	97	97.5	5425.83	3766.98	26	870	8248.5	8271	8332	65.48	45.46	0.31	10.5	99.55	99.82	100.56
RLX-incomp_YEQ92-B-R258-Map3	Z. tritici YEQ92	YEQ92	2262	44379	65	11	61	13	80.61	10.61	59.5	73	79.4	89.6	98.2	727.52	853.11	21	159	225	890	2304	32.16	37.71	0.93	7.03	9.95	39.35	101.86
RLX-incomp_YEQ92-B-R292-Map4	Z. tritici YEQ92	YEQ92	5248	38633	21	2	18	3	82.56	12.43	57.8	71.07	85.15	93.6	98.4	2146.28	1968.51	111	125	1764	3542	5256	40.9	37.51	2.12	2.38	33.61	67.49	100.15
RLX-incomp_YEQ92-B-R33-Map20_reversed	Z. tritici YEQ92	YEQ92	8399	196541	70	11	61	14	85.17	11.9	55.3	81	89.3	94.34	96.7	3222.11	3451.77	29	274	1077	7491	8545	38.36	41.1	0.35	3.26	12.82	89.19	101.74
RLX-incomp_YEQ92-B-R341-Map3_reversed	Z. tritici YEQ92	YEQ92	5388	16636	12	2	11	3	88.17	6.18	81.2	83.2	87.5	93	98.1	1512.36	2483.52	21	21	70	5346	5402	28.07	46.09	0.39	0.39	1.3	99.22	100.26
RLX-incomp_YEQ92-B-R364-Map3_reversed	Z. tritici YEQ92	YEQ92	10640	22269	7	2	7	2	85.17	12.93	67	69.3	86.5	97.5	100	3181.29	5097.39	52	74	383	10640	10640	29.9	47.91	0.49	0.7	3.6	100	100
RLX-incomp_YEQ92-B-R46-Map20	Z. tritici YEQ92	YEQ92	7022	491886	136	42	117	54	90.23	11.27	56.7	92.3	95.6	96.4	97.97	4204.42	3003.5	25	661	6075	6923	7454	59.87	42.77	0.36	9.41	86.51	98.59	106.15
RLX-incomp_YEQ92-B-R49-Map3	Z. tritici YEQ92	YEQ92	1956	7648	5	3	5	3	78.1	18.68	58.1	63.1	74.5	94.8	100	1529.6	848.94	21	1739	1952	1956	1980	78.2	43.4	1.07	88.91	99.8	100	101.23
RXX_YEQ92-B-R485-Map3	Z. tritici YEQ92	YEQ92	6870	34672	39	1	39	1	79.32	12.16	57.3	70.2	73.4	91.8	99.4	889.03	1146.19	56	298	505	1374	6871	12.94	16.68	0.82	4.34	7.35	20	100.01
RXX-LARD_YEQ92-B-G315-Map5	Z. tritici YEQ92	YEQ92	10606	53258	41	3	41	3	88.39	7.14	77.9	83.5	85.9	96.7	100	1309.93	3153.2	22	52	72	101	10646	12.35	29.73	0.21	0.49	0.68	0.95	100.38
RXX-TRIM_YEQ92-B-G378-Map4	Z. tritici YEQ92	YEQ92	561	4362	9	6	9	6	91.44	6.38	82.5	86.5	90.1	97.7	98.9	484.67	130.86	171	525	540	553	560	86.39	23.33	30.48	93.58	96.26	98.57	99.82
RXX-TRIM_YEQ92-B-G399-Map4	Z. tritici YEQ92	YEQ92	803	4458	9	3	9	3	92.38	6.51	78.7	91.6	95.4	96.3	98.8	495.33	281.5	61	279	470	775	805	61.69	35.06	7.6	34.74	58.53	96.51	100.25
RXX-TRIM_YEQ92-B-G569-Map5	Z. tritici YEQ92	YEQ92	1818	18526	27	4	27	4	88.43	10.35	74	74	94.6	96.3	99.1	686.15	667.44	100	123	348	1205	1889	37.74	36.71	5.5	6.77	19.14	66.28	103.91
RXX-TRIM_YEQ92-B-R198-Map5	Z. tritici YEQ92	YEQ92	537	3303	7	5	7	5	92.3	5.67	84.3	88.5	90.1	98.3	98.6	471.86	130.87	189	431	533	539	543	87.87	24.37	35.2	80.26	99.26	100.37	101.12
RXX-TRIM_YEQ92-B-R492-Map4	Z. tritici YEQ92	YEQ92	533	2965	12	5	11	5	95.71	4.07	87.7	94.1	97.7	98.7	100	272	250.99	22	23	197	529	537	51.03	47.09	4.13	4.32	36.96	99.25	100.75
RXX_Zt05-B-R387-Map3_reversed	Z. tritici Zt05	Zt05	8789	39726	16	3	14	3	86.19	9.9	67	75.4	91.1	94.5	97.6	2837.57	3521.93	124	488	660.5	4750	8846	32.29	40.07	1.41	5.55	7.52	54.04	100.65
RXX-LARD_Zt05-B-G286-Map5	Z. tritici Zt05	Zt05	19904	174464	74	2	68	2	90.36	9.06	74.8	81.3	93.35	99.9	100	2677.09	5162.39	30	71	114.5	2493	19907	13.45	25.94	0.15	0.36	0.58	12.53	100.02
RXX-TRIM_Zt05-B-G373-Map12	Z. tritici Zt05	Zt05	779	6004	12	3	12	3	95.01	1.7	92	93.5	95.3	96.7	97.3	500.33	288.47	114	215	661.5	753	779	64.23	37.03	14.63	27.6	84.92	96.66	100
RXX-TRIM_Zt05-B-G428-Map5	Z. tritici Zt05	Zt05	1271	3545	5	1	5	1	84.72	7.63	78	78.8	82.7	87.5	96.6	709	402.5	130	592	706	893	1224	55.78	31.67	10.23	46.58	55.55	70.26	96.3
RIX-comp_Zt05-B-G18-Map20_reversed	Z. tritici Zt05	Zt05	9237	27217	13	1	10	1	86.18	9.54	64.8	80.6	90.3	92.1	96.1	2723	3472.11	69	98	264.5	5630	9076	29.48	37.59	0.75	1.06	2.86	60.95	98.26
RIX-comp_Zt05-B-G208-Map3	Z. tritici Zt05	Zt05	10615	712582	205	1	193	2	95.58	1.27	88.2	95.1	95.6	96.1	99.1	3705.18	2420.09	28	850	4982	5575	10621	34.91	22.8	0.26	8.01	46.93	52.52	100.06
RIX-comp_Zt05-B-R107-Map6	Z. tritici Zt05	Zt05	5525	44702	17	3	16	3	93.52	3.24	83.8	92.4	94.4	95.7	96.7	2793.88	2064.25	207	946	2882	4736	5671	50.57	37.36	3.75	17.12	52.16	85.72	102.64
RIX-comp_Zt05-B-R3-Map19	Z. tritici Zt05	Zt05	25324	561008	142	1	113	1	89.25	8.05	67.2	85.1	93	94.5	100	4964.96	6500.5	23	229	1688	7986	25615	19.61	25.67	0.09	0.9	6.67	31.54	101.15
RIX-comp_Zt05-B-R305-Map4_reversed	Z. tritici Zt05	Zt05	6575	53203	27	2	19	3	76.06	11.36	56.5	67.37	78.28	81.9	99.6	2800.16	2545.96	45	194	3242	4694	6575	42.59	38.72	0.68	2.95	49.31	71.39	100
RIX-comp_Zt05-B-R414-Map8_reversed	Z. tritici Zt05	Zt05	6615	29989	18	1	16	1	93.67	2.56	88.8	92	93.85	96.2	97	1876.44	1937.28	41	640	1090.5	3940	6718	28.37	29.29	0.62	9.67	16.49	59.56	101.56
RIX-incomp_Zt05-B-G191-Map20_reversed	Z. tritici Zt05	Zt05	5140	147654	34	27	34	27	95.36	6.67	68.2	96.6	97.05	97.3	98.5	4342.76	1674.8	26	5105	5113.5	5118	5363	84.49	32.58	0.51	99.32	99.48	99.57	104.34
RLX-comp_Zt05-B-G162-Map20	Z. tritici Zt05	Zt05	6423	172764	71	14	65	18	89.25	11.52	55.8	86.7	94.7	95.8	97.9	2657.91	2703.35	28	238	1242	6236	6455	41.38	42.09	0.44	3.71	19.34	97.09	100.5
RLX-comp_Zt05-B-G173-Map5_reversed	Z. tritici Zt05	Zt05	5047	32172	14	4	13	5	89.7	10.48	70	78	95.8	96.6	98.2	2474.77	2386.04	35	167	1585	5040	5048	49.03	47.28	0.69	3.31	31.4	99.86	100.02
RLX-comp_Zt05-B-G205-Map3_reversed	Z. tritici Zt05	Zt05	6418	54995	37	3	36	4	79.2	14.57	58.9	67.5	69.7	95.4	97.3	1527.64	2039.07	26	275	928	1113	6456	23.8	31.77	0.41	4.28	14.46	17.34	100.59
RLX-comp_Zt05-B-G236-Map6	Z. tritici Zt05	Zt05	6719	33007	27	3	24	3	78.95	16.92	56.9	61.9	77.05	96.1	98.2	1375.29	2174.36	62	113	290	1552	6719	20.47	32.36	0.92	1.68	4.32	23.1	100
RLX-comp_Zt05-B-G237-Map8_reversed	Z. tritici Zt05	Zt05	6961	91609	36	7	31	9	85.66	14.92	54.2	75.9	95.2	96.7	97.7	2955.48	3099.12	30	159	1105	6956	6971	42.46	44.52	0.43	2.28	15.87	99.93	100.14
RLX-comp_Zt05-B-G270-Map3	Z. tritici Zt05	Zt05	12167	87362	27	5	21	6	74.15	13.86	55.4	61.1	72.8	86.8	98.8	4160.1	5467.31	36	224	617	12089	12217	34.19	44.94	0.3	1.84	5.07	99.36	100.41
RLX-comp_Zt05-B-R141-Map20_reversed	Z. tritici Zt05	Zt05	8471	110667	28	7	25	9	90.85	9.45	60	91.8	94.87	95.52	96.3	4426.68	3752.33	25	298	4958	8460	8475	52.26	44.3	0.3	3.52	58.53	99.87	100.05
RLX-comp_Zt05-B-R156-Map17_reversed	Z. tritici Zt05	Zt05	6801	56592	33	1	27	1	87.68	13.21	56.1	83.9	95.5	97.1	98.7	2096.78	2025.91	37	298	1643	3686	6821	30.83	29.79	0.54	4.38	24.16	54.2	100.29
RLX-comp_Zt05-B-R231-Map6_reversed	Z. tritici Zt05	Zt05	13616	215035	59	4	38	12	91.04	6.16	56.7	90.98	91.5	92.56	100	5659.26	5981.48	32	762	1373	13641	13812	41.56	43.93	0.24	5.6	10.08	100.18	101.44
RLX-comp_Zt05-B-R354-Map8_reversed	Z. tritici Zt05	Zt05	9490	35240	12	1	10	1	92.82	8.13	74.8	93.1	95.91	98	98.8	3524	3592.78	80	198	2593	5415	9504	37.13	37.86	0.84	2.09	27.32	57.06	100.15
RLX-incomp_Zt05-B-G151-Map20	Z. tritici Zt05	Zt05	4628	12749	14	1	13	1	67.11	13.03	55.6	59.1	65.4	66.8	95	980.69	1163.99	53	276	885	1114	4591	21.19	25.15	1.15	5.96	19.12	24.07	99.2
RLX-incomp_Zt05-B-G232-Map20	Z. tritici Zt05	Zt05	6838	231133	86	15	73	19	87.69	12.26	55.2	84.1	94.4	95.3	97.4	3166.9	2775.09	23	278	2774	6611	6985	46.31	40.58	0.34	4.07	40.57	96.68	102.15
RLX-incomp_Zt05-B-G24-Map8_reversed	Z. tritici Zt05	Zt05	8908	63396	19	1	13	3	94.03	6.17	74.3	94.91	95.62	96.75	97.6	4876.62	3750.41	157	784	4784	8356	9069	54.74	42.1	1.76	8.8	53.7	93.8	101.81
RLX-incomp_Zt05-B-G250-Map17	Z. tritici Zt05	Zt05	10255	54868	32	1	27	2	85.85	11.12	67.7	72.4	91.16	95.8	98.8	2032.15	2973.32	22	168	689	2278	10163	19.82	28.99	0.21	1.64	6.72	22.21	99.1
RLX-incomp_Zt05-B-G253-Map11_reversed	Z. tritici Zt05	Zt05	8284	121886	29	9	23	12	94.9	4.24	77.1	95.3	96.3	96.6	97.4	5299.39	3623.2	69	281	8239	8261	8405	63.97	43.74	0.83	3.39	99.46	99.72	101.46
RLX-incomp_Zt05-B-G26-Map12	Z. tritici Zt05	Zt05	11853	15835	17	1	16	1	85.32	13.79	56.86	80.5	90.65	96	100	989.69	2875.87	32	133	233	313	11706	8.35	24.26	0.27	1.12	1.97	2.64	98.76
RLX-incomp_Zt05-B-G266-Map3	Z. tritici Zt05	Zt05	9239	96024	17	8	16	8	91.39	12.49	56.97	95.5	96.45	97.5	98.8	6001.5	4359.74	27	798	8902.5	9421	9624	64.96	47.19	0.29	8.64	96.36	101.97	104.17
RLX-incomp_Zt05-B-G278-Map20	Z. tritici Zt05	Zt05	9514	357036	71	26	60	31	94.44	2.66	79.6	93.4	95.3	96.1	97	5950.9	4054.03	104	1697	9233.5	9443	9551	62.55	42.61	1.09	17.84	97.05	99.25	100.39
RLX-incomp_Zt05-B-P29.18-Map8_reversed	Z. tritici Zt05	Zt05	6812	340468	96	25	76	35	94.05	4.59	66.2	93.95	94.7	96.2	97.2	4480.28	2613.6	82	1814	5711	6805	6829	65.77	38.37	1.2	26.63	83.84	99.9	100.25
RLX-incomp_Zt05-B-P31.16-Map6_reversed	Z. tritici Zt05	Zt05	7029	537555	170	48	146	56	90.24	10.36	55.9	92.7	95	95.5	96.8	3683.09	2998.48	21	254	3647	6929	7131	52.4	42.66	0.3	3.61	51.89	98.58	101.45
RLX-incomp_Zt05-B-R10-Map4_reversed	Z. tritici Zt05	Zt05	6228	20733	25	2	19	3	79.82	12.35	57.61	72.92	77.1	91.4	97.1	1091.21	2289.72	29	49	120	254	6242	17.52	36.76	0.47	0.79	1.93	4.08	100.22
RLX-incomp_Zt05-B-R11-Map20_reversed	Z. tritici Zt05	Zt05	6396	530862	113	71	102	74	93.67	6.02	73.7	93.9	95.9	96.7	97.7	5204.84	2219.83	28	5624	6356.5	6358	6519	81.38	34.71	0.44	87.93	99.38	99.41	101.92
RLX-incomp_Zt05-B-R181-Map4_reversed	Z. tritici Zt05	Zt05	4962	42412	23	3	15	5	75.32	12.56	60.88	67.5	69.7	88.2	97.96	2827.47	2028.95	32	221	2847	4962	4994	56.98	40.89	0.64	4.45	57.38	100	100.64
RLX-incomp_Zt05-B-R239-Map20_reversed	Z. tritici Zt05	Zt05	13297	158590	55	3	41	3	84.08	14.52	56.99	67.8	93.7	95.9	97.3	3868.83	4109.79	29	721	2866	6154	13149	29.1	30.91	0.22	5.42	21.55	46.28	98.89
RLX-incomp_Zt05-B-R248-Map12	Z. tritici Zt05	Zt05	6921	133330	54	21	42	23	86.13	15.15	56.8	69.7	93.3	100	100	4334.67	3135.95	30	120	6840.5	6919	6961	62.63	45.31	0.43	1.73	98.84	99.97	100.58
RLX-incomp_Zt05-B-R275-Map3_reversed	Z. tritici Zt05	Zt05	11091	47012	23	2	20	3	80.44	12.5	55.1	72.1	79.05	92.4	97.7	2350.6	4148.36	32	120	181.5	3693	11100	21.19	37.4	0.29	1.08	1.64	33.3	100.08
RLX-incomp_Zt05-B-R28-Map20_reversed	Z. tritici Zt05	Zt05	14277	282226	50	3	41	3	93.47	3.58	75.9	92.7	94.8	95.46	95.9	6883.61	5836.61	83	622	6262	13011	14218	48.21	40.88	0.58	4.36	43.86	91.13	99.59
RLX-incomp_Zt05-B-R317-Map7	Z. tritici Zt05	Zt05	8088	66123	42	1	34	5	85.32	13.04	55	80	86.95	96	100	1944.79	2897.74	28	81	439	2490	8421	24.05	35.83	0.35	1	5.43	30.79	104.12
RLX-incomp_Zt05-B-R36-Map5	Z. tritici Zt05	Zt05	9480	65261	70	2	59	2	85.46	10.03	62	78.6	87.5	93.6	98.8	1106.64	2290.97	32	91	261	731	9726	11.67	24.17	0.34	0.96	2.75	7.71	102.59
RLX-incomp_Zt05-B-R464-Map4_reversed	Z. tritici Zt05	Zt05	2026	10561	7	4	7	4	89.09	12.71	62	86.2	92.5	98.1	98.7	1508.71	943.18	130	130	2027	2093	2150	74.47	46.55	6.42	6.42	100.05	103.31	106.12
DHX-incomp_Zt05-B-G187-Map5	Z. tritici Zt05	Zt05	5470	14284	13	2	11	2	86.14	5.4	77.55	83.3	85.4	87.8	97.4	1298.55	2221.88	29	45	50	2661	5579	23.74	40.62	0.53	0.82	0.91	48.65	101.99
DHX-incomp_Zt05-B-G193-Map10	Z. tritici Zt05	Zt05	8196	57594	11	5	10	6	96.27	1.63	93.8	95.48	96.2	96.9	100	5759.4	3457	31	3990	8174	8217	8300	70.27	42.18	0.38	48.68	99.73	100.26	101.27
DHX-incomp_Zt05-B-P0.38-Map9_reversed	Z. tritici Zt05	Zt05	13736	320075	57	11	48	16	94.86	4.21	78.4	94.79	95.9	96.4	100	6669.4	6035.83	30	86	5627.5	13718	13758	48.55	43.94	0.22	0.63	40.97	99.87	100.16
DHX-incomp_Zt05-B-R26-Map4	Z. tritici Zt05	Zt05	7906	46280	47	3	45	3	80.39	11.06	55.8	70.8	82.3	88.8	98.3	1028.44	2321.26	27	66	149	416	7906	13.01	29.36	0.34	0.83	1.88	5.26	100
DHX-incomp_Zt05-B-R431-Map3_reversed	Z. tritici Zt05	Zt05	2736	5747	5	2	5	2	77.44	18.09	57.1	68.2	69.2	92.7	100	1149.4	1449.16	48	57	170	2736	2736	42.01	52.97	1.75	2.08	6.21	100	100
DMX-incomp_Zt05-B-G273-Map5	Z. tritici Zt05	Zt05	10977	121451	35	8	26	8	87.86	7.29	73.9	82.1	89.28	93	97.5	4671.85	5080.04	31	133	1039.5	10871	11235	42.56	46.28	0.28	1.21	9.47	99.03	102.35
DXX-MITE_Zt05-B-G305-Map3	Z. tritici Zt05	Zt05	352	2106	10	3	10	3	86.48	9.53	75.8	80.9	82.45	99.4	100	210.6	114.27	65	119	193	348	352	59.83	32.46	18.47	33.81	54.83	98.86	100
DXX-MITE_Zt05-B-G313-Map4	Z. tritici Zt05	Zt05	403	2044	10	4	10	4	90.64	6.74	81	84.1	89.85	97.8	98.2	204.4	173.57	44	54	116	401	403	50.72	43.07	10.92	13.4	28.78	99.5	100
DXX-MITE_Zt05-B-G326-Map3	Z. tritici Zt05	Zt05	459	3222	11	4	11	4	86.61	9.51	71.4	81.6	84.6	98	99.1	292.91	174.22	51	122	372	459	475	63.81	37.96	11.11	26.58	81.05	100	103.49
DXX-MITE_Zt05-B-G343-Map3	Z. tritici Zt05	Zt05	556	7814	46	4	44	4	95.82	5.97	74.5	95.2	98.4	99.5	100	181.59	155.13	25	91	139	169	576	32.66	27.9	4.5	16.37	25	30.4	103.6
DXX-MITE_Zt05-B-P11.30-Map5	Z. tritici Zt05	Zt05	414	3774	11	8	11	8	87.43	9.95	71.7	79.4	87.1	97.3	99	343.09	141.9	49	336	412	418	425	82.87	34.28	11.84	81.16	99.52	100.97	102.66
DXX-MITE_Zt05-B-P18.26-Map3	Z. tritici Zt05	Zt05	487	2933	8	4	7	5	96.5	4.63	86.2	96.9	97.9	99.2	99.42	419	131.19	144	353	486	487	491	86.04	26.94	29.57	72.48	99.79	100	100.82
DXX-MITE_Zt05-B-P21.24-Map4	Z. tritici Zt05	Zt05	641	3440	9	4	8	5	91.43	7.46	80.3	85.9	95.2	97.8	98	430	300.29	63	70	632	659	665	67.08	46.85	9.83	10.92	98.6	102.81	103.74
DXX-MITE_Zt05-B-P34.14-Map3	Z. tritici Zt05	Zt05	354	1102	4	3	4	3	96.5	5.28	88.6	98.6	99	99.4	99.4	275.5	155.67	42	353	353	354	354	77.82	43.97	11.86	99.72	99.72	100	100
DXX-MITE_Zt05-B-P40.8-Map3	Z. tritici Zt05	Zt05	418	2144	5	3	5	3	82.88	14.78	71.6	72.2	72.5	98.1	100	428.8	16.65	415	417	418	447	447	102.58	3.98	99.28	99.76	100	106.94	106.94
DXX-MITE_Zt05-B-P5.35-Map4	Z. tritici Zt05	Zt05	490	5095	19	7	18	7	87.75	7.15	77.3	79.9	88.95	95.5	97.3	283.06	204.55	33	47	269	488	513	57.77	41.75	6.73	9.59	54.9	99.59	104.69
DXX-MITE_Zt05-B-P6.34-Map4	Z. tritici Zt05	Zt05	506	4336	10	6	10	6	92.27	8.86	74	83.7	97.4	98	98.4	433.6	161.91	48	489	499	505	536	85.69	32	9.49	96.64	98.62	99.8	105.93
DXX-MITE_Zt05-B-R143-Map9	Z. tritici Zt05	Zt05	573	5211	11	8	11	8	95.88	1.51	93	94.6	96	97.4	97.7	473.73	204.38	49	524	569	571	577	82.67	35.67	8.55	91.45	99.3	99.65	100.7
DTX-comp_Zt05-B-G115-Map4	Z. tritici Zt05	Zt05	3583	22348	16	3	15	3	91.27	6.88	70.7	87.4	94.2	95.2	97.1	1489.87	1511.33	72	149	488	3194	3585	41.58	42.18	2.01	4.16	13.62	89.14	100.06
DTX-comp_Zt05-B-G548-Map3	Z. tritici Zt05	Zt05	2217	11629	15	3	14	3	88.12	8.71	72.95	82	91.55	93.6	98.2	830.64	894.46	28	38	456	1521	2218	37.47	40.35	1.26	1.71	20.57	68.61	100.05
DTX-comp_Zt05-B-P25.21-Map4	Z. tritici Zt05	Zt05	2215	22118	20	6	16	7	86.11	9.27	65.5	82	86.4	95.4	96	1382.38	942.76	28	500	1820.5	2207	2213	62.41	42.56	1.26	22.57	82.19	99.64	99.91
DTX-comp_Zt05-B-P26.20-Map5_reversed	Z. tritici Zt05	Zt05	4042	30952	45	6	43	6	81.13	8.32	70	76.1	78.6	83.9	99.6	719.81	1361.23	32	109	159	429	4103	17.81	33.68	0.79	2.7	3.93	10.61	101.51
DTX-comp_Zt05-B-P51.41-Map3	Z. tritici Zt05	Zt05	4088	24365	23	4	20	5	79.76	10.69	62.4	71.8	78.35	88.25	97.5	1218.25	1707.26	28	159	339.5	4058	4107	29.8	41.76	0.68	3.89	8.3	99.27	100.46
DTX-comp_Zt05-B-R103-Map3_reversed	Z. tritici Zt05	Zt05	2197	17896	14	5	12	7	84.59	7.57	75	77.8	83.6	90.03	98.3	1491.33	1006.27	51	224	2182.5	2206	2224	67.88	45.8	2.32	10.2	99.34	100.41	101.23
DTX-comp_Zt05-B-R124-Map3_reversed	Z. tritici Zt05	Zt05	1890	7935	9	3	9	3	90.09	10.24	71.8	91.4	92.2	97.1	100	881.67	870.59	30	81	356	1879	1890	46.65	46.06	1.59	4.29	18.84	99.42	100
DTX-comp_Zt05-B-R125-Map9_reversed	Z. tritici Zt05	Zt05	3528	31439	22	1	19	2	84.08	13.39	67.7	70.45	80.47	97.4	98.9	1654.68	1119.09	312	512	1450	2491	3574	46.9	31.72	8.84	14.51	41.1	70.61	101.3
DTX-comp_Zt05-B-R127-Map4	Z. tritici Zt05	Zt05	3405	40507	41	7	35	8	82.04	9.25	64.3	75.12	79.6	90.9	97.7	1157.34	1421.2	21	55	212	3193	3440	33.99	41.74	0.62	1.62	6.23	93.77	101.03
DTX-comp_Zt05-B-R178-Map5	Z. tritici Zt05	Zt05	3527	24329	14	5	13	5	84.73	9.58	68.2	80.3	83.6	88	99	1871.46	1483.52	51	496	1533	3536	3686	53.06	42.06	1.45	14.06	43.46	100.26	104.51
DTX-comp_Zt05-B-R184-Map12_reversed	Z. tritici Zt05	Zt05	2982	43728	46	5	37	8	88.53	7.9	71	84.1	88.2	96.8	98.2	1181.84	1214.42	31	51	612	2367	3008	39.63	40.73	1.04	1.71	20.52	79.38	100.87
DTX-comp_Zt05-B-R225-Map10_reversed	Z. tritici Zt05	Zt05	3402	29638	23	3	20	5	84.87	11.1	70.91	72.9	87.05	97.1	98.6	1481.9	1539.59	42	283	387	3397	3589	43.56	45.26	1.23	8.32	11.38	99.85	105.5
DTX-comp_Zt05-B-R234-Map5_reversed	Z. tritici Zt05	Zt05	2153	8770	7	2	7	2	94.96	6.44	80.4	96.5	97.3	97.9	98.1	1252.86	833.08	152	316	1209	2152	2153	58.19	38.69	7.06	14.68	56.15	99.95	100
DTX-comp_Zt05-B-R237-Map4	Z. tritici Zt05	Zt05	3532	28728	25	5	21	5	82.96	11.9	68.2	69.96	83.6	94.7	97.8	1368	1419.01	38	81	985	2711	3531	38.73	40.18	1.08	2.29	27.89	76.76	99.97
DTX-comp_Zt05-B-R238-Map6	Z. tritici Zt05	Zt05	2190	17881	14	7	14	7	87.36	8.53	72.4	79.6	86.75	96	99.5	1277.21	994.63	38	63	1691.5	2189	2192	58.32	45.42	1.74	2.88	77.24	99.95	100.09
DTX-comp_Zt05-B-R256-Map6	Z. tritici Zt05	Zt05	4352	28125	23	1	20	1	76.54	13.34	61.4	68.7	70.8	97.2	98	1406.25	1572.25	27	165	519	3166	4351	32.31	36.13	0.62	3.79	11.93	72.75	99.98
DTX-comp_Zt05-B-R313-Map5	Z. tritici Zt05	Zt05	3298	36421	16	6	14	8	82.56	10.25	69.7	75.4	77.9	94	97.5	2601.5	1199	134	2725	3280	3315	3321	78.88	36.36	4.06	82.63	99.45	100.52	100.7
DTX-comp_Zt05-B-R32-Map6_reversed	Z. tritici Zt05	Zt05	2218	25466	20	7	18	8	84.36	10.52	69.9	75.3	81.7	95.8	97.2	1414.78	953.21	27	338	2028	2196	2391	63.79	42.98	1.22	15.24	91.43	99.01	107.8
DTX-comp_Zt05-B-R366-Map6	Z. tritici Zt05	Zt05	4604	62913	33	8	28	9	76.32	10.52	63	69.1	71.4	82.7	98.2	2246.89	1906.07	31	400	1835.5	4566	4630	48.8	41.4	0.67	8.69	39.87	99.17	100.56
DTX-comp_Zt05-B-R5-Map4_reversed	Z. tritici Zt05	Zt05	3408	11110	5	2	5	2	88.98	10.37	71.4	88.3	93.6	94	97.6	2222	1340.63	240	1605	2441	3410	3414	65.2	39.34	7.04	47.1	71.63	100.06	100.18
DTX-comp_Zt05-B-R68-Map8	Z. tritici Zt05	Zt05	3563	20788	14	2	11	3	88.29	12.45	65.9	72.13	96.1	97.3	98	1889.82	1400.21	29	507	2170	3553	3568	53.04	39.3	0.81	14.23	60.9	99.72	100.14
DTX-incomp_Zt05-B-G111-Map8	Z. tritici Zt05	Zt05	3723	12398	6	2	6	2	87.2	14.31	66.5	71.2	95.6	96.7	97.6	2066.33	1431.54	352	989	1839	3675	3704	55.5	38.45	9.45	26.56	49.4	98.71	99.49
DTX-incomp_Zt05-B-G188-Map7	Z. tritici Zt05	Zt05	5393	52528	19	8	17	8	90.87	5.57	77	88.6	89.8	96	100	3089.88	2531.1	27	82	4337	5367	5434	57.29	46.93	0.5	1.52	80.42	99.52	100.76
DTX-incomp_Zt05-B-G192-Map4	Z. tritici Zt05	Zt05	5410	47338	21	6	16	8	88	6.58	78.8	82.93	87.66	94.8	97.8	2958.62	2654.51	28	64	4404	5411	5444	54.69	49.07	0.52	1.18	81.4	100.02	100.63
DTX-incomp_Zt05-B-G247-Map7	Z. tritici Zt05	Zt05	7317	58600	13	6	13	6	91.78	7.07	74.2	90.4	94.8	96	98.1	4507.69	3012.22	29	2921	4390	7290	7298	61.61	41.17	0.4	39.92	60	99.63	99.74
DTX-incomp_Zt05-B-G5-Map20	Z. tritici Zt05	Zt05	5476	19694	9	1	9	1	85.51	8.21	71.1	82.9	84.9	91.2	98.4	2188.22	2085.59	49	72	2089	3417	5423	39.96	38.09	0.89	1.31	38.15	62.4	99.03
DTX-incomp_Zt05-B-G54-Map10	Z. tritici Zt05	Zt05	2956	24863	16	5	14	6	84.89	14.28	58.1	67.9	90.8	97.1	98.9	1775.93	1151.74	79	669	1790.5	2916	2940	60.08	38.96	2.67	22.63	60.57	98.65	99.46
DTX-incomp_Zt05-B-G574-Map3	Z. tritici Zt05	Zt05	2619	11172	13	4	13	4	89.54	8.23	72.4	86.2	89.1	97.2	100	859.38	1218.59	25	46	96	2593	2623	32.81	46.53	0.95	1.76	3.67	99.01	100.15
DTX-incomp_Zt05-B-G92-Map20	Z. tritici Zt05	Zt05	5535	50706	14	9	14	9	90.59	5.4	80.3	86.3	92.05	95.8	96.6	3621.86	2547.34	50	357	5415	5449	5510	65.44	46.02	0.9	6.45	97.83	98.45	99.55
DTX-incomp_Zt05-B-P10.31-Map3_reversed	Z. tritici Zt05	Zt05	2222	10145	28	3	27	3	85.74	5.92	77.9	80.9	85.3	89.1	97.7	375.74	716.37	38	56	66	121	2222	16.91	32.24	1.71	2.52	2.97	5.45	100
DTX-incomp_Zt05-B-P23.22-Map3	Z. tritici Zt05	Zt05	2916	8073	5	2	5	2	82.02	13.18	70.5	73.2	74.3	92.1	100	1614.6	1365.03	178	212	1861	2906	2916	55.37	46.81	6.1	7.27	63.82	99.66	100
DTX-incomp_Zt05-B-P46.2-Map5	Z. tritici Zt05	Zt05	6962	71689	24	6	22	6	92.06	8.88	70.2	91.9	96.65	97.4	98.3	3258.59	2888.41	62	421	3096	6951	7181	46.81	41.49	0.89	6.05	44.47	99.84	103.15
DTX-incomp_Zt05-B-P47.1-Map4	Z. tritici Zt05	Zt05	5454	38603	34	4	31	4	91.32	7.57	70.6	86.8	92.9	96.9	100	1245.26	2033.3	27	34	52	2300	5450	22.83	37.28	0.5	0.62	0.95	42.17	99.93
DTX-incomp_Zt05-B-P9.32-Map6_reversed	Z. tritici Zt05	Zt05	7932	48724	17	6	17	6	91.86	9.49	68.3	93.1	95.7	98	99	2866.12	3855.77	29	29	137	7927	7931	36.13	48.61	0.37	0.37	1.73	99.94	99.99
DTX-incomp_Zt05-B-R117-Map6_reversed	Z. tritici Zt05	Zt05	3596	41380	20	7	17	9	81.92	8.46	71.2	76	78.8	91.62	95.72	2434.29	1508.73	49	457	3530	3552	3621	67.69	41.96	1.36	12.71	98.16	98.78	100.7
DTX-incomp_Zt05-B-R126-Map3	Z. tritici Zt05	Zt05	2212	2915	2	1	2	1	97.45	0.07	97.4	97.4	97.45	97.5	97.5	1457.5	1067.02	703	703	1457.5	2212	2212	65.89	48.24	31.78	31.78	65.89	100	100
DTX-incomp_Zt05-B-R142-Map3	Z. tritici Zt05	Zt05	5357	21762	6	4	6	4	89.77	7.17	81	82.1	90.2	97.4	97.7	3627	2766.41	56	56	5380	5396	5494	67.71	51.64	1.05	1.05	100.43	100.73	102.56
DTX-incomp_Zt05-B-R182-Map3_reversed	Z. tritici Zt05	Zt05	2884	18011	13	6	13	6	84.97	6.72	76.6	81.2	83.5	86	98.3	1385.46	1438.24	51	85	288	2879	2925	48.04	49.87	1.77	2.95	9.99	99.83	101.42
DTX-incomp_Zt05-B-R200-Map3_reversed	Z. tritici Zt05	Zt05	1459	1727	2	1	2	1	86.15	17.18	74	74	86.15	98.3	98.3	863.5	842.16	268	268	863.5	1459	1459	59.18	57.72	18.37	18.37	59.18	100	100
DTX-incomp_Zt05-B-R277-Map8_reversed	Z. tritici Zt05	Zt05	4324	24969	43	4	43	4	87.23	8.45	69.8	79.5	90.6	95.2	98.3	580.67	1302.39	21	39	109	201	4360	13.43	30.12	0.49	0.9	2.52	4.65	100.83
DTX-incomp_Zt05-B-R287-Map7	Z. tritici Zt05	Zt05	2882	17936	14	2	13	2	90.87	10.74	67.2	87.66	95.4	97.6	98.6	1379.69	921.44	118	920	1291	1958	2883	47.87	31.97	4.09	31.92	44.8	67.94	100.03
DTX-incomp_Zt05-B-R300-Map3	Z. tritici Zt05	Zt05	5331	22311	15	2	13	3	89.34	5.87	79.5	85.7	86.38	94.4	98.3	1716.23	2304.53	32	49	160	3705	5338	32.19	43.23	0.6	0.92	3	69.5	100.13
DTX-incomp_Zt05-B-R309-Map3	Z. tritici Zt05	Zt05	3719	7480	2	2	2	2	96.35	1.63	95.2	95.2	96.35	97.5	97.5	3740	21.21	3725	3725	3740	3755	3755	100.56	0.57	100.16	100.16	100.56	100.97	100.97
DTX-incomp_Zt05-B-R328-Map3	Z. tritici Zt05	Zt05	870	4393	6	5	6	5	90.48	8.05	81	81.8	92.2	97.4	98.3	732.17	335.17	49	835	870	884	885	84.16	38.53	5.63	95.98	100	101.61	101.72
DTX-incomp_Zt05-B-R334-Map3_reversed	Z. tritici Zt05	Zt05	2798	16687	10	4	9	4	86.48	9.23	70.5	81.14	84.6	91.9	100	1854.11	1363.56	50	60	2795	2838	3001	66.27	48.73	1.79	2.14	99.89	101.43	107.26
DTX-incomp_Zt05-B-R346-Map4_reversed	Z. tritici Zt05	Zt05	702	5550	9	7	9	7	89.87	7.52	78.5	81.1	92.6	95.4	97.6	616.67	161.9	236	685	685	701	701	87.84	23.06	33.62	97.58	97.58	99.86	99.86
DTX-incomp_Zt05-B-R47-Map17_reversed	Z. tritici Zt05	Zt05	4489	48635	42	3	39	3	83.07	10.32	57.5	74.4	82.3	93.3	97.1	1247.05	1418.08	23	119	687	2175	4526	27.78	31.59	0.51	2.65	15.3	48.45	100.82
DTX-incomp_Zt05-B-R59-Map20	Z. tritici Zt05	Zt05	4035	55666	45	5	42	7	86.82	9.95	64.2	78.4	85.4	96.6	98.4	1325.38	1489.27	27	144	558.5	2720	4051	32.85	36.91	0.67	3.57	13.84	67.41	100.4
DTX-incomp_Zt05-B-R78-Map4	Z. tritici Zt05	Zt05	2323	16682	14	5	14	5	84.77	8.47	69.3	78.4	83.65	89.5	97.1	1191.57	1006.24	37	142	1134	2248	2378	51.29	43.32	1.59	6.11	48.82	96.77	102.37
DTX-incomp_Zt05-B-R89-Map13	Z. tritici Zt05	Zt05	5453	58535	35	1	25	4	90.85	8.92	70	89.64	94.2	97.5	98.7	2341.4	1772.05	102	888	2108	3158	5516	42.94	32.5	1.87	16.28	38.66	57.91	101.16
noCat_Zt05-B-G213-Map20	Z. tritici Zt05	Zt05	6066	31408	14	1	11	1	92.28	4.86	84.08	86.8	94.6	96	97.9	2855.27	1956.62	40	1453	2995	4363	6053	47.07	32.26	0.66	23.95	49.37	71.93	99.79
noCat_Zt05-B-G309-Map20	Z. tritici Zt05	Zt05	653	21524	82	6	82	6	92.78	3.22	78.4	92.4	93.25	94.7	98	262.49	207.96	21	141	146	569	654	40.2	31.85	3.22	21.59	22.36	87.14	100.15
noCat_Zt05-B-G381-Map20	Z. tritici Zt05	Zt05	776	10168	15	2	15	2	96.7	1.23	94.5	96.1	96.6	97	100	677.87	174.57	54	710	720	726	804	87.35	22.5	6.96	91.49	92.78	93.56	103.61
noCat_Zt05-B-G67-Map13	Z. tritici Zt05	Zt05	4028	17142	20	2	18	2	85.04	10.59	69.3	75.4	85.1	94.68	98.1	952.33	1382.97	32	104	146	1612	4035	23.64	34.33	0.79	2.58	3.62	40.02	100.17
noCat_Zt05-B-R210-Map11	Z. tritici Zt05	Zt05	5937	49258	65	1	64	1	79.97	10.56	59.4	72.2	78.2	87.8	98.8	769.66	1273.58	28	71	195.5	971	5828	12.96	21.45	0.47	1.2	3.29	16.36	98.16
noCat_Zt05-B-R254-Map12	Z. tritici Zt05	Zt05	7115	47029	26	4	25	4	92.15	10.88	69.7	92.1	97.8	99.5	100	1881.16	2433.84	86	468	647	1631	7115	26.44	34.21	1.21	6.58	9.09	22.92	100
noCat_Zt05-B-R55-Map20	Z. tritici Zt05	Zt05	894	97924	152	17	152	17	92.04	2.79	76.5	90.6	91.8	93.6	100	644.24	268.26	50	634	767.5	815	941	72.06	30.01	5.59	70.92	85.85	91.16	105.26
noCat_Zt05-B-R73-Map13	Z. tritici Zt05	Zt05	845	80157	118	28	115	28	91.16	3.93	78.2	90	92.1	93.6	100	697.02	203.22	72	678	761	809	1011	82.49	24.05	8.52	80.24	90.06	95.74	119.64
RXX_Zt09-B-R419-Map3	Z. tritici Zt09	Zt09	1682	11534	20	3	17	3	85.47	10.06	70.6	76.66	85	96.1	98.3	678.47	617.39	74	224	269	1218	1704	40.34	36.71	4.4	13.32	15.99	72.41	101.31
RXX-LARD_Zt09-B-R256-Map5	Z. tritici Zt09	Zt09	3922	29342	19	1	18	1	81.87	11.44	66.6	72.4	75.42	95.7	97.5	1630.11	1381.78	45	227	1677	2851	3922	41.56	35.23	1.15	5.79	42.76	72.69	100
RXX-TRIM_Zt09-B-G280-Map5	Z. tritici Zt09	Zt09	587	2119	6	2	5	2	96.98	2.23	93.2	96.8	97.9	98.19	98.8	423.8	245.95	143	167	587	596	626	72.2	41.9	24.36	28.45	100	101.53	106.64
RXX-TRIM_Zt09-B-G282-Map3	Z. tritici Zt09	Zt09	560	4561	14	4	13	4	87.43	6.5	78.9	83.1	86.1	93.2	97.9	350.85	197.44	59	184	390	538	566	62.65	35.26	10.54	32.86	69.64	96.07	101.07
RXX-TRIM_Zt09-B-G369-Map3	Z. tritici Zt09	Zt09	1412	7122	17	1	13	1	87.04	6.7	78.04	81.65	86.7	91.9	96.7	547.85	387.5	142	258	433	828	1412	38.8	27.44	10.06	18.27	30.67	58.64	100
RXX-TRIM_Zt09-B-R4-Map3	Z. tritici Zt09	Zt09	900	2716	6	1	5	1	96.43	1.75	94.1	95.9	96.3	96.9	98.95	543.2	294.21	190	336	519	776	895	60.36	32.69	21.11	37.33	57.67	86.22	99.44
RYX-incomp_Zt09-B-R259-Map3	Z. tritici Zt09	Zt09	4652	22982	11	3	10	4	81.67	11.35	69.8	73.3	77.6	96.9	97.3	2298.2	2159.2	133	311	1817.5	4652	4660	49.4	46.41	2.86	6.69	39.07	100	100.17
RIX-comp_Zt09-B-G225-Map3_reversed	Z. tritici Zt09	Zt09	7075	7310	2	1	2	1	99.25	0.64	98.8	98.8	99.25	99.7	99.7	3655	4836.61	235	235	3655	7075	7075	51.66	68.36	3.32	3.32	51.66	100	100
RIX-comp_Zt09-B-G82-Map12_reversed	Z. tritici Zt09	Zt09	3713	11446	16	1	16	1	95.69	2.42	88.9	95.4	95.85	97.1	100	715.38	1018.26	32	270	362	735	3711	19.27	27.42	0.86	7.27	9.75	19.8	99.95
RIX-comp_Zt09-B-P18.21-Map5	Z. tritici Zt09	Zt09	5114	57076	14	12	14	12	94.78	7.76	68.3	96.6	97	97.7	98.1	4441.86	1701.57	330	5108	5110.5	5112	5115	86.86	33.27	6.45	99.88	99.93	99.96	100.02
RIX-comp_Zt09-B-R1-Map20	Z. tritici Zt09	Zt09	26736	561979	130	2	100	3	88.7	8.57	63.5	83.5	92.88	95	96.9	5622.79	7525.24	21	210	1019	8759	26469	21.03	28.15	0.08	0.79	3.81	32.76	99
RIX-comp_Zt09-B-R2-Map20	Z. tritici Zt09	Zt09	5641	660476	179	81	169	88	95.64	3.16	79.4	94.3	96.2	97.7	99.4	3908.14	2110.93	40	1698	5562	5580	5620	69.28	37.42	0.71	30.1	98.6	98.92	99.63
RIX-comp_Zt09-B-R242-Map15	Z. tritici Zt09	Zt09	8647	76429	28	2	27	2	90.64	7.66	63.5	89.9	93	94.9	97.8	2830.7	2774.27	82	476	2182	4204	8470	32.74	32.08	0.95	5.5	25.23	48.62	97.95
RIX-comp_Zt09-B-R433-Map3	Z. tritici Zt09	Zt09	5500	7458	5	1	5	1	79.42	10.21	70.1	73.7	77.1	79.7	96.5	1491.6	2277.93	273	479	484	663	5559	27.12	41.42	4.96	8.71	8.8	12.05	101.07
RLX-comp_Zt09-B-G157-Map20	Z. tritici Zt09	Zt09	6393	181486	91	17	85	21	86.33	13.33	54.7	74.5	94.5	95.6	98.2	2135.13	2639.42	30	259	313	5880	6369	33.4	41.29	0.47	4.05	4.9	91.98	99.62
RLX-comp_Zt09-B-G179-Map5_reversed	Z. tritici Zt09	Zt09	6234	57881	29	5	27	5	77.85	13.04	56.7	67.9	77.7	92	96.9	2143.74	2342.91	28	70	1752	3369	6235	34.39	37.58	0.45	1.12	28.1	54.04	100.02
RLX-comp_Zt09-B-G217-Map10_reversed	Z. tritici Zt09	Zt09	8470	113828	26	8	22	10	91.07	8.69	66.7	92.5	95.35	95.9	96.3	5174	3514.2	25	1539	6238	8462	8479	61.09	41.49	0.3	18.17	73.65	99.91	100.11
RLX-comp_Zt09-B-G240-Map4	Z. tritici Zt09	Zt09	12692	199503	71	2	59	3	93.27	6.76	67.4	94.3	96	96.8	100	3381.85	3431.52	30	662	2346	4442	12710	26.65	27.04	0.24	5.22	18.48	35	100.14
RLX-comp_Zt09-B-P19.20-Map6_reversed	Z. tritici Zt09	Zt09	6968	149255	40	14	36	16	88.87	12.29	54.1	78.6	96.4	96.7	98	4146.03	3460.98	29	344	4826.5	6958	13541	59.5	49.67	0.42	4.94	69.27	99.86	194.33
RLX-comp_Zt09-B-R26-Map20_reversed	Z. tritici Zt09	Zt09	6821	161574	74	8	65	9	88.62	12.62	56	86	95.3	96.5	98.1	2485.94	2214.84	31	515	1939	3839	6816	36.45	32.47	0.45	7.55	28.43	56.28	99.93
RLX-incomp_Zt09-B-G210-Map3	Z. tritici Zt09	Zt09	10244	51587	39	1	35	1	79.42	15.35	55.6	65.66	84.28	95.3	97.3	1474.91	2293.99	21	78	436	1550	10241	14.4	22.39	0.2	0.76	4.26	15.13	99.97
RLX-incomp_Zt09-B-G231-Map20	Z. tritici Zt09	Zt09	9538	306713	57	18	46	21	94.13	4.19	77.8	94.3	95.7	96.22	96.7	6668.87	3267.34	105	4217	8377.5	9476	9542	69.92	34.26	1.1	44.21	87.83	99.35	100.04
RLX-incomp_Zt09-B-G236-Map12_reversed	Z. tritici Zt09	Zt09	12498	484590	104	17	93	24	93.22	3.77	75.6	93.5	94.2	95	97.1	5210.81	5178.61	31	301	2711	11952	12543	41.69	41.44	0.25	2.41	21.69	95.63	100.36
RLX-incomp_Zt09-B-G324-Map4	Z. tritici Zt09	Zt09	929	3766	4	4	4	4	92.15	0.73	91.6	91.7	91.9	93.2	93.2	941.5	9	928	946	946	946	946	101.35	0.97	99.89	101.83	101.83	101.83	101.83
RLX-incomp_Zt09-B-G410-Map4_reversed	Z. tritici Zt09	Zt09	1615	11337	23	5	23	5	88.33	7.47	71.3	81.9	89.4	94.5	98.8	492.91	647.77	31	108	115	1212	1628	30.52	40.11	1.92	6.69	7.12	75.05	100.8
RLX-incomp_Zt09-B-P25.14-Map9	Z. tritici Zt09	Zt09	6819	303610	65	34	60	38	94.15	5.75	56.8	94.8	95.43	95.8	97.5	5060.17	2551.29	93	3400	6800	6804	6970	74.21	37.41	1.36	49.86	99.72	99.78	102.21
RLX-incomp_Zt09-B-R13-Map20_reversed	Z. tritici Zt09	Zt09	6402	523280	108	67	99	73	95.18	2.13	83.3	93.7	95.6	96.8	97.7	5286.96	2027.66	69	5459	6357	6358	6387	82.58	31.67	1.08	85.27	99.3	99.31	99.77
RLX-incomp_Zt09-B-R195-Map9_reversed	Z. tritici Zt09	Zt09	6428	9198	6	1	6	1	92.75	7.72	82.5	83.3	96.75	98.4	98.8	1533	2347.56	77	190	782	1115	6252	23.85	36.52	1.2	2.96	12.17	17.35	97.26
RLX-incomp_Zt09-B-R196-Map5_reversed	Z. tritici Zt09	Zt09	8280	97638	53	1	39	5	81.4	13.01	55.2	72	85.65	90.4	97.6	2503.54	3271.4	21	141	266	5352	8387	30.24	39.51	0.25	1.7	3.21	64.64	101.29
RLX-incomp_Zt09-B-R234-Map3	Z. tritici Zt09	Zt09	966	966	1	1	1	1	100	0	100	100	100	100	100	966	0	966	966	966	966	966	100	0	100	100	100	100	100
RLX-incomp_Zt09-B-R24-Map20_reversed	Z. tritici Zt09	Zt09	8281	178665	34	14	27	15	95	2.04	89.31	94.3	95.7	96.4	96.9	6618.44	2396.38	790	5606	8251	8261	8323	79.92	28.94	9.54	67.7	99.64	99.76	100.51
RLX-incomp_Zt09-B-R270-Map6	Z. tritici Zt09	Zt09	3007	19275	16	3	14	4	77.55	13.8	58.4	68.2	73.59	91.8	99.3	1376.79	1179.12	127	378	935.5	3007	3014	45.79	39.21	4.22	12.57	31.11	100	100.23
RLX-incomp_Zt09-B-R319-Map9_reversed	Z. tritici Zt09	Zt09	3981	28323	29	3	25	3	76.61	18.59	54.4	59.64	67.57	96.9	98.5	1132.92	1314.99	22	123	572	1420	3981	28.46	33.03	0.55	3.09	14.37	35.67	100
RLX-incomp_Zt09-B-R320-Map5_reversed	Z. tritici Zt09	Zt09	2735	13673	5	5	5	5	97.12	1.04	95.8	96.5	97	98	98.3	2734.6	0.89	2733	2735	2735	2735	2735	99.99	0.03	99.93	100	100	100	100
RLX-incomp_Zt09-B-R328-Map3	Z. tritici Zt09	Zt09	10286	68277	33	2	29	2	80.27	10.88	64.5	71.1	79.8	90.2	98.3	2354.38	2632.72	31	723	1559	3761	10287	22.89	25.6	0.3	7.03	15.16	36.56	100.01
RLX-incomp_Zt09-B-R39-Map20	Z. tritici Zt09	Zt09	7017	348830	105	25	91	29	92.84	7.24	60	93.38	95.4	96.3	100	3833.38	2750.53	21	905	4231	6923	7021	54.63	39.2	0.3	12.9	60.3	98.66	100.06
RLX-incomp_Zt09-B-R402-Map3_reversed	Z. tritici Zt09	Zt09	3072	33671	48	2	40	2	83.81	8.79	65.42	77.1	86.75	91.3	98.9	842.27	857.63	21	186	748	885	3072	27.42	27.92	0.68	6.05	24.35	28.81	100
RLX-incomp_Zt09-B-R403-Map3	Z. tritici Zt09	Zt09	975	12229	26	1	24	1	81.99	9.06	63.3	76.2	80.55	87.9	98.6	509.54	279.38	54	402	570.5	583	944	52.26	28.65	5.54	41.23	58.51	59.79	96.82
RLX-incomp_Zt09-B-R405-Map4_reversed	Z. tritici Zt09	Zt09	2263	22106	14	8	12	9	75.8	9.37	64	71.7	73.35	78.2	98.2	1842.17	866.5	28	2260	2263	2268	2329	81.4	38.29	1.24	99.87	100	100.22	102.92
RLX-incomp_Zt09-B-R415-Map3_reversed	Z. tritici Zt09	Zt09	1442	6754	7	2	7	2	89.44	9.7	77.6	80	95.4	97.4	100	964.86	597.94	102	104	1191	1442	1442	66.91	41.47	7.07	7.21	82.59	100	100
RLX-incomp_Zt09-B-R416-Map3_reversed	Z. tritici Zt09	Zt09	1237	6133	6	5	6	5	85.75	11.98	74.1	75.1	85.1	95.1	100	1022.17	474.02	55	1198	1209.5	1224	1237	82.63	38.32	4.45	96.85	97.78	98.95	100
DHX-incomp_Zt09-B-G243-Map3_reversed	Z. tritici Zt09	Zt09	14548	67253	53	3	42	3	84.05	9.24	56	77.6	87	90.2	98.3	1601.26	3917.48	42	115	138	301	14796	11.01	26.93	0.29	0.79	0.95	2.07	101.7
DHX-incomp_Zt09-B-P41.0-Map6_reversed	Z. tritici Zt09	Zt09	13721	308884	97	11	87	13	83.49	12.56	57.2	69.6	85	95.6	100	3550.39	5066.31	30	135	313	5203	13910	25.88	36.92	0.22	0.98	2.28	37.92	101.38
DXX-MITE_Zt09-B-G257-Map5	Z. tritici Zt09	Zt09	360	1878	7	5	7	5	95.71	5.92	85.7	88.6	98.9	99.4	99.4	268.29	152.88	42	47	357	359	359	74.52	42.47	11.67	13.06	99.17	99.72	99.72
DXX-MITE_Zt09-B-G283-Map9	Z. tritici Zt09	Zt09	496	8526	34	12	33	12	87.87	7.19	76.3	82.1	84.8	95.9	97.8	258.36	199.72	30	92	118	491	518	52.09	40.27	6.05	18.55	23.79	98.99	104.44
DXX-MITE_Zt09-B-G286-Map4	Z. tritici Zt09	Zt09	500	3805	10	6	10	6	91	9.38	72.4	81.7	95.55	97.8	99	380.5	202.12	33	230	494	499	535	76.1	40.42	6.6	46	98.8	99.8	107
DXX-MITE_Zt09-B-G288-Map3	Z. tritici Zt09	Zt09	494	1976	5	3	4	4	95.92	6.08	86.87	98	98.5	99.8	99.8	494	5.72	487	494	494	501	501	100	1.16	98.58	100	100	101.42	101.42
DXX-MITE_Zt09-B-P31.10-Map3	Z. tritici Zt09	Zt09	424	2058	7	4	7	4	85.57	10.19	74	79	82.9	99.3	100	294	160.67	90	128	418	423	424	69.34	37.89	21.23	30.19	98.58	99.76	100
DXX-MITE_Zt09-B-P33.8-Map3	Z. tritici Zt09	Zt09	351	1766	14	2	14	2	87.39	9.03	68.8	85	88.75	93.5	100	126.14	108.82	47	54	77	154	351	35.94	31	13.39	15.38	21.94	43.87	100
DXX-MITE_Zt09-B-P34.7-Map4	Z. tritici Zt09	Zt09	522	3172	6	4	6	4	92.75	11.08	70.3	95	97.25	98.3	98.4	528.67	53.53	493	501	511	520	636	101.28	10.26	94.44	95.98	97.89	99.62	121.84
DXX-MITE_Zt09-B-P38.3-Map3	Z. tritici Zt09	Zt09	661	1980	3	3	3	3	98.7	0.53	98.1	98.1	98.9	99.1	99.1	660	2	658	658	660	662	662	99.85	0.3	99.55	99.55	99.85	100.15	100.15
DXX-MITE_Zt09-B-P6.33-Map3	Z. tritici Zt09	Zt09	412	7465	21	8	21	8	76.89	9.19	70.1	71.6	73	75.5	100	355.48	114.49	50	376	400	412	446	86.28	27.79	12.14	91.26	97.09	100	108.25
DXX-MITE_Zt09-B-R70-Map4	Z. tritici Zt09	Zt09	625	3244	9	2	9	2	91.44	7.27	80	85.9	93.4	97.6	98.6	360.44	271.29	69	73	551	578	625	57.67	43.41	11.04	11.68	88.16	92.48	100
DXX-MITE_Zt09-B-R91-Map3	Z. tritici Zt09	Zt09	337	824	3	2	3	2	93.57	10.63	81.3	81.3	99.4	100	100	274.67	107.96	150	150	337	337	337	81.5	32.04	44.51	44.51	100	100	100
DTX-comp_Zt09-B-G1-Map4_reversed	Z. tritici Zt09	Zt09	3358	26818	29	5	25	6	80.36	9.26	62.4	75.1	81	85	97.1	1072.72	1424.17	21	43	188	2174	3502	31.95	42.41	0.63	1.28	5.6	64.74	104.29
DTX-comp_Zt09-B-G105-Map3	Z. tritici Zt09	Zt09	3570	38078	30	3	21	7	79.29	12.03	57.3	71.4	74	90.33	98.3	1813.24	1521	76	397	1184	3566	3748	50.79	42.61	2.13	11.12	33.17	99.89	104.99
DTX-comp_Zt09-B-G145-Map5_reversed	Z. tritici Zt09	Zt09	4610	18751	10	3	10	3	93.01	6.49	81.3	87.5	95.8	98.2	100	1875.1	2107.42	25	48	815	4502	4612	40.67	45.71	0.54	1.04	17.68	97.66	100.04
DTX-comp_Zt09-B-G71-Map3	Z. tritici Zt09	Zt09	4353	26945	23	3	20	3	82.01	11.66	66.7	71.6	80.9	95.9	98.3	1347.25	1735.78	22	51	215.5	3392	4353	30.95	39.88	0.51	1.17	4.95	77.92	100
DTX-comp_Zt09-B-P42.38-Map3_reversed	Z. tritici Zt09	Zt09	4629	52923	42	5	30	6	76.11	9.57	60.7	69.7	72	81.4	98.2	1764.1	1870.4	53	61	734	3594	4628	38.11	40.41	1.14	1.32	15.86	77.64	99.98
DTX-comp_Zt09-B-R104-Map6_reversed	Z. tritici Zt09	Zt09	2208	9267	9	2	9	2	90.47	10.12	68.2	86.7	96.3	96.6	97.6	1029.67	890.11	45	176	869	1703	2208	46.63	40.31	2.04	7.97	39.36	77.13	100
DTX-comp_Zt09-B-R122-Map4	Z. tritici Zt09	Zt09	2218	6641	3	3	3	3	92.97	4.93	87.3	87.3	95.3	96.3	96.3	2213.67	4.51	2209	2209	2214	2218	2218	99.8	0.2	99.59	99.59	99.82	100	100
DTX-comp_Zt09-B-R137-Map11	Z. tritici Zt09	Zt09	3466	28054	31	3	28	4	85.95	11.52	65.9	73.7	90.6	95.7	98.9	1001.93	1195.25	39	134	438	2063	3433	28.91	34.48	1.13	3.87	12.64	59.52	99.05
DTX-comp_Zt09-B-R143-Map10_reversed	Z. tritici Zt09	Zt09	2193	13371	19	1	18	1	91.12	7	77.5	85.2	95.01	96.2	98	744.56	722.62	40	181	461	1187	2422	33.95	32.95	1.82	8.25	21.02	54.13	110.44
DTX-comp_Zt09-B-R37-Map3	Z. tritici Zt09	Zt09	2195	11698	12	4	11	4	83.58	10.12	70.9	74.8	80	96.9	98.4	1063.45	963.63	58	182	1017	2189	2210	48.45	43.9	2.64	8.29	46.33	99.73	100.68
DTX-comp_Zt09-B-R63-Map9	Z. tritici Zt09	Zt09	2203	20869	17	4	16	4	85.9	10.49	71.5	76.4	86.15	97.2	97.7	1304.31	825.53	126	485	1664	2169	2201	59.21	37.47	5.72	22.02	75.53	98.46	99.91
DTX-incomp_Zt09-B-G154-Map8	Z. tritici Zt09	Zt09	5498	54594	23	8	23	8	88.92	8.71	69.5	83.7	93.8	96	96.4	2373.65	2610.84	27	49	496	5394	5556	43.17	47.49	0.49	0.89	9.02	98.11	101.05
DTX-incomp_Zt09-B-G3-Map20	Z. tritici Zt09	Zt09	5482	54466	35	3	26	8	85.15	9.29	56.4	84.18	86.58	88.6	97	2094.85	2510.24	28	48	59	5299	5459	38.21	45.79	0.51	0.88	1.08	96.66	99.58
DTX-incomp_Zt09-B-G493-Map4	Z. tritici Zt09	Zt09	2217	13183	35	4	34	4	83.13	8.05	66.4	78.1	81.9	86.8	100	387.74	720.52	34	65	69.5	195	2217	17.49	32.5	1.53	2.93	3.13	8.8	100
DTX-incomp_Zt09-B-G56-Map3	Z. tritici Zt09	Zt09	2915	31731	18	6	14	8	85.78	8.31	71.56	78.22	86.8	91.9	98.6	2266.5	968.72	389	1320	2913	2929	3091	77.75	33.23	13.34	45.28	99.93	100.48	106.04
DTX-incomp_Zt09-B-G64-Map6	Z. tritici Zt09	Zt09	3702	28569	32	2	28	4	84.97	9.73	67.3	76.9	84.42	96.4	98.3	1020.32	1362.56	28	67	150.5	2043	3803	27.56	36.81	0.76	1.81	4.07	55.19	102.73
DTX-incomp_Zt09-B-P10.29-Map3_reversed	Z. tritici Zt09	Zt09	1339	13344	16	5	13	5	85.43	11.45	70.2	76.5	77.42	96.8	98.1	1026.46	447.44	160	846	1271	1338	1407	76.66	33.42	11.95	63.18	94.92	99.93	105.08
DTX-incomp_Zt09-B-P32.9-Map3_reversed	Z. tritici Zt09	Zt09	1972	8402	7	3	6	4	89.15	8.24	77.9	81.2	90.79	94.2	100	1400.33	888.81	77	449	1964.5	1972	1975	71.01	45.07	3.9	22.77	99.62	100	100.15
DTX-incomp_Zt09-B-R118-Map4_reversed	Z. tritici Zt09	Zt09	2146	12708	10	3	8	4	82	12.4	68.8	71.4	79.47	95.26	99.2	1588.5	741.8	51	1411	1793	2158	2164	74.02	34.57	2.38	65.75	83.55	100.56	100.84
DTX-incomp_Zt09-B-R147-Map10	Z. tritici Zt09	Zt09	4210	51681	41	7	35	11	79.99	9.14	61.1	73.7	77.1	90.2	95.6	1476.6	1901.15	25	111	147	4024	4205	35.07	45.16	0.59	2.64	3.49	95.58	99.88
DTX-incomp_Zt09-B-R15-Map4	Z. tritici Zt09	Zt09	3213	33538	74	2	65	2	85.58	9.02	64.2	79.38	85	93.9	100	515.97	984.28	27	36	113	325	3213	16.06	30.63	0.84	1.12	3.52	10.12	100
DTX-incomp_Zt09-B-R159-Map3	Z. tritici Zt09	Zt09	2815	14578	15	3	13	3	86.79	12.29	67.5	82.8	85.8	97.4	100	1121.38	1170.69	36	55	551	2388	2828	39.84	41.59	1.28	1.95	19.57	84.83	100.46
DTX-incomp_Zt09-B-R172-Map5_reversed	Z. tritici Zt09	Zt09	2369	16601	12	5	12	5	84.82	12.38	70.6	72.1	84.6	98.1	98.7	1383.42	928.73	69	714	1277.5	2336	2392	58.4	39.2	2.91	30.14	53.93	98.61	100.97
DTX-incomp_Zt09-B-R18-Map6_reversed	Z. tritici Zt09	Zt09	2216	18721	16	6	12	7	85.18	10.54	68.9	77.9	84.7	96	97.4	1560.08	863.35	59	1232	2143	2195	2210	70.4	38.96	2.66	55.6	96.71	99.05	99.73
DTX-incomp_Zt09-B-R20-Map6	Z. tritici Zt09	Zt09	2711	19907	22	3	21	4	83.07	8.54	70.3	78.09	80.2	93.4	98.3	947.95	1182.09	23	94	126	2522	2733	34.97	43.6	0.85	3.47	4.65	93.03	100.81
DTX-incomp_Zt09-B-R206-Map4_reversed	Z. tritici Zt09	Zt09	2303	9206	12	1	9	2	88.5	8.95	69	83.1	91.4	93.87	96.9	1022.89	874.77	66	224	828	1620	2314	44.42	37.98	2.87	9.73	35.95	70.34	100.48
DTX-incomp_Zt09-B-R217-Map4_reversed	Z. tritici Zt09	Zt09	2576	15641	14	3	12	3	84.74	13.53	56.2	79.61	88.35	96.9	98	1303.42	1032.27	77	604	1098	2576	2635	50.6	40.07	2.99	23.45	42.62	100	102.29
DTX-incomp_Zt09-B-R25-Map14	Z. tritici Zt09	Zt09	7085	37031	27	2	25	2	90.77	9.3	64.87	86.8	95	97.7	100	1481.24	2354.5	26	40	134	1954	7060	20.91	33.23	0.37	0.56	1.89	27.58	99.65
DTX-incomp_Zt09-B-R258-Map8	Z. tritici Zt09	Zt09	4005	18643	25	2	24	2	82.91	12.79	63	72.7	76.85	97.6	100	778.42	1246.81	27	119	161	1559	4200	19.44	31.13	0.67	2.97	4.02	38.93	104.87
DTX-incomp_Zt09-B-R280-Map4	Z. tritici Zt09	Zt09	5423	78949	46	9	41	11	84.83	6.02	73.5	80.5	82.9	90.1	97.2	1926.76	2323.15	25	84	249	5156	5495	35.53	42.84	0.46	1.55	4.59	95.08	101.33
DTX-incomp_Zt09-B-R316-Map3_reversed	Z. tritici Zt09	Zt09	1005	1075	3	1	3	1	95.57	1.46	94	94	95.8	96.9	96.9	358.33	559.17	33	33	38	1004	1004	35.66	55.64	3.28	3.28	3.78	99.9	99.9
DTX-incomp_Zt09-B-R375-Map3_reversed	Z. tritici Zt09	Zt09	1545	12979	13	4	13	4	79.42	11.23	68.7	73.5	74.4	80.8	98.7	998.38	600.98	52	282	1397	1469	1545	64.62	38.9	3.37	18.25	90.42	95.08	100
DTX-incomp_Zt09-B-R53-Map4	Z. tritici Zt09	Zt09	2112	21016	12	7	11	8	85.33	7.63	76.8	77.9	83.8	91.9	98.5	1910.55	494.76	599	2039	2077	2137	2237	90.46	23.43	28.36	96.54	98.34	101.18	105.92
DTX-incomp_Zt09-B-R56-Map11	Z. tritici Zt09	Zt09	5463	67849	26	4	22	6	85.78	9.18	71.1	76	88.7	94.2	98.4	3084.05	2074.62	31	990	3156.5	5229	5452	56.45	37.98	0.57	18.12	57.78	95.72	99.8
DTX-incomp_Zt09-B-R60-Map4	Z. tritici Zt09	Zt09	2746	15169	16	2	12	4	78.02	11.44	62.4	69.2	76.08	90.26	99.2	1264.08	1189.8	81	170	840.5	2744	2752	46.03	43.33	2.95	6.19	30.61	99.93	100.22
DTX-incomp_Zt09-B-R89-Map11	Z. tritici Zt09	Zt09	5498	45345	26	6	24	7	89.06	8.79	65.2	87.2	92.9	95.26	96.9	1889.38	2485.76	28	38	149.5	5421	5490	34.36	45.21	0.51	0.69	2.72	98.6	99.85
noCat_Zt09-B-G153-Map20	Z. tritici Zt09	Zt09	6163	85598	28	4	25	4	93.35	4.24	76.3	93.5	94.7	95.3	97	3423.92	1947.36	22	1576	3851	5333	5969	55.56	31.6	0.36	25.57	62.49	86.53	96.85
noCat_Zt09-B-G176-Map20	Z. tritici Zt09	Zt09	6461	68986	30	8	29	9	90.66	6.84	75.9	86.9	94.3	95.2	100	2378.83	2862.42	28	30	103	6177	6240	36.82	44.3	0.43	0.46	1.59	95.6	96.58
noCat_Zt09-B-G87-Map20	Z. tritici Zt09	Zt09	4727	13887	25	1	25	1	92.66	3.18	78.5	92.4	93.2	93.9	95.9	555.48	979.72	257	273	274	298	4494	11.75	20.73	5.44	5.78	5.8	6.3	95.07
noCat_Zt09-B-P2.1-Map12	Z. tritici Zt09	Zt09	823	47986	67	22	65	22	93.49	2.09	86.56	92.1	93.6	94.8	97.1	738.25	107.19	345	693	774	790	884	89.7	13.02	41.92	84.2	94.05	95.99	107.41
noCat_Zt09-B-R12-Map20	Z. tritici Zt09	Zt09	858	100894	138	31	137	31	92.05	1.82	84.61	91	92.1	93.1	96	736.45	128.36	45	684	765	813	942	85.83	14.96	5.24	79.72	89.16	94.76	109.79
noCat_Zt09-B-R30-Map12	Z. tritici Zt09	Zt09	6980	47146	24	4	24	4	86.2	12.92	68.2	71.1	96.2	97	100	1964.42	2563.5	28	260	600	3347	7127	28.14	36.73	0.4	3.72	8.6	47.95	102.11
noCat_Zt09-B-R51-Map12	Z. tritici Zt09	Zt09	817	31980	51	8	47	8	92.51	2.58	87.11	90.8	92.8	94.2	97.3	682.81	164.99	36	626	736	776	911	83.58	20.19	4.41	76.62	90.09	94.98	111.51
RXX_Zt10-B-G117-Map3	Z. tritici Zt10	Zt10	4376	8911	6	1	4	2	80.49	12.52	69	76.5	77.34	98.3	98.3	2227.75	2494.56	41	94	2234	4402	4402	50.91	57.01	0.94	2.15	51.05	100.59	100.59
RXX_Zt10-B-R384-Map3_reversed	Z. tritici Zt10	Zt10	1283	8123	15	2	15	2	86.24	8.7	72.4	80.5	86.8	93.5	100	541.53	412.27	85	390	399	1035	1283	42.21	32.13	6.63	30.4	31.1	80.67	100
RXX-LARD_Zt10-B-G214-Map18	Z. tritici Zt10	Zt10	9809	84679	49	4	47	4	87.37	8.5	74.8	79.2	85.1	95.3	100	1801.96	3826.01	23	52	95	167	16594	18.37	39.01	0.23	0.53	0.97	1.7	169.17
RXX-LARD_Zt10-B-R1-Map4	Z. tritici Zt10	Zt10	7353	28945	22	2	22	2	81.27	9.91	68.8	75.6	77.9	83.5	99.9	1338	2451.11	78	97	235	574	7353	18.2	33.33	1.06	1.32	3.2	7.81	100
RXX-TRIM_Zt10-B-G254-Map4	Z. tritici Zt10	Zt10	563	7325	18	8	18	8	90.51	5.16	81.1	87.5	91	95.9	97.8	406.94	185.52	75	185	532.5	553	562	72.28	32.95	13.32	32.86	94.58	98.22	99.82
RXX-TRIM_Zt10-B-G309-Map5	Z. tritici Zt10	Zt10	1099	5480	7	3	7	3	95.57	1.85	93.8	93.9	95	98.1	98.1	782.86	379.04	315	409	1033	1104	1104	71.23	34.49	28.66	37.22	93.99	100.45	100.45
RYX-incomp_Zt10-B-R176-Map8	Z. tritici Zt10	Zt10	4687	37477	17	6	16	6	85.21	10.08	70.7	75.9	81.02	96.9	97.6	2342.31	2131.59	41	228	1901	4686	4725	49.97	45.48	0.87	4.86	40.56	99.98	100.81
RIX-comp_Zt10-B-G108-Map3	Z. tritici Zt10	Zt10	5265	17535	8	1	7	1	93.92	1.46	91.5	93.16	93.9	95.2	95.8	2505	1912.75	693	785	1930	4778	5259	47.58	36.33	13.16	14.91	36.66	90.75	99.89
RIX-comp_Zt10-B-G4-Map20	Z. tritici Zt10	Zt10	7708	296214	67	1	66	1	94.82	2.95	74.6	94.7	95.3	95.6	98	4488.09	1968.04	35	3765	5574.5	5583	7760	58.23	25.53	0.45	48.85	72.32	72.43	100.67
RIX-comp_Zt10-B-G54-Map9	Z. tritici Zt10	Zt10	3468	7905	34	1	34	1	96.31	1.08	92.2	96.7	96.7	96.7	97.1	232.5	618.19	25	29	29	29	3451	6.7	17.83	0.72	0.84	0.84	0.84	99.51
RIX-comp_Zt10-B-R115-Map11	Z. tritici Zt10	Zt10	7185	52156	28	1	26	1	90.67	6.4	73.5	87.5	93.75	94.8	97.5	2006.31	2151.59	31	132	944	3678	7162	27.92	29.95	0.43	1.84	13.14	51.19	99.68
RIX-comp_Zt10-B-R2-Map13	Z. tritici Zt10	Zt10	13224	236922	80	3	70	3	89.09	7.6	71.2	83	92.6	94.7	97.4	3385.8	4060.44	24	222	950.5	6018	13207	25.6	30.71	0.18	1.68	7.19	45.51	99.87
RIX-incomp_Zt10-B-R191-Map3	Z. tritici Zt10	Zt10	803	11576	18	8	17	8	90.43	4.26	82.3	88.8	90.65	92.1	97.6	680.94	176.94	82	616	754	797	822	84.8	22.03	10.21	76.71	93.9	99.25	102.37
RLX-comp_Zt10-B-G127-Map5_reversed	Z. tritici Zt10	Zt10	6790	39583	30	1	25	1	89.55	12.84	56.14	85.5	96.4	97.2	99	1583.48	1875.95	28	227	1226	1999	6788	23.32	27.63	0.41	3.34	18.06	29.44	99.97
RLX-comp_Zt10-B-G140-Map4	Z. tritici Zt10	Zt10	6911	44212	18	3	15	5	83.17	9.4	69.2	75.05	83	92.6	97.3	2947.73	3109.1	52	92	2208	6820	6887	42.65	44.99	0.75	1.33	31.95	98.68	99.65
RLX-comp_Zt10-B-G164-Map13	Z. tritici Zt10	Zt10	6377	107740	44	9	40	13	83.28	15.17	57.3	67.6	93.33	95.9	97.7	2693.5	2788.18	28	66	1104.5	6292	6360	42.24	43.72	0.44	1.03	17.32	98.67	99.73
RLX-comp_Zt10-B-G177-Map10	Z. tritici Zt10	Zt10	6865	134024	43	11	38	12	95.05	5.09	66.3	95.7	96.25	96.6	100	3527.53	2820.07	31	528	3295	6794	6863	51.38	41.08	0.45	7.69	48	98.97	99.97
RLX-comp_Zt10-B-G186-Map3	Z. tritici Zt10	Zt10	6934	35214	13	4	13	4	82.43	14.02	55.9	76.5	83.2	91.2	98.6	2708.77	3311.35	52	80	348	6712	6933	39.07	47.76	0.75	1.15	5.02	96.8	99.99
RLX-comp_Zt10-B-G189-Map4_reversed	Z. tritici Zt10	Zt10	7220	48367	26	4	20	4	79.21	13.25	59.7	69.4	73.55	94.1	97.8	2418.4	2926.56	76	112	978.5	6415	7219	33.5	40.53	1.05	1.55	13.55	88.85	99.99
RLX-comp_Zt10-B-G192-Map10	Z. tritici Zt10	Zt10	6964	97885	36	10	33	11	84.26	15.21	53.8	70.65	95.8	97	97.9	2966.21	3132.98	32	161	1052	6952	7096	42.59	44.99	0.46	2.31	15.11	99.83	101.9
RLX-comp_Zt10-B-G194-Map14	Z. tritici Zt10	Zt10	8487	155309	37	12	34	15	88.83	13.89	56.6	93	95.7	96.5	97.8	4567.91	3803.17	23	431	4554	8464	8651	53.82	44.81	0.27	5.08	53.66	99.73	101.93
RLX-comp_Zt10-B-G213-Map3	Z. tritici Zt10	Zt10	12623	114768	17	6	15	8	85.73	12.83	65.4	69.7	93.8	94.9	97.8	7651.2	5697.26	178	524	12043	12552	12684	60.61	45.13	1.41	4.15	95.41	99.44	100.48
RLX-comp_Zt10-B-G219-Map3	Z. tritici Zt10	Zt10	13392	40841	8	3	8	3	91.03	9.76	73.7	83.6	96.65	98.3	99	5105.12	6851.41	21	95	260	13391	13393	38.12	51.16	0.16	0.71	1.94	99.99	100.01
RLX-comp_Zt10-B-P4.34-Map7	Z. tritici Zt10	Zt10	6835	372727	114	34	96	39	91.82	9.4	56	93.2	94.75	95.8	100	3883.47	2911.16	21	922	4712.5	6803	6830	56.82	42.59	0.31	13.49	68.95	99.53	99.93
RLX-comp_Zt10-B-R6-Map11_reversed	Z. tritici Zt10	Zt10	6863	17843	5	1	5	1	96.08	3.06	90.7	96.5	97.4	97.8	98	3568.6	1832.34	2424	2817	2817	2958	6827	52	26.7	35.32	41.05	41.05	43.1	99.48
RLX-comp_Zt10-B-R76-Map20	Z. tritici Zt10	Zt10	13595	473720	65	23	60	23	93.47	6.83	62.4	95.38	95.9	96.4	97.1	7896.68	5409.92	117	2525	8607	13519	13583	58.09	39.79	0.86	18.57	63.31	99.44	99.91
RLX-comp_Zt10-B-R8-Map7_reversed	Z. tritici Zt10	Zt10	6824	29969	11	3	10	4	81.67	12.41	65.2	67.9	83.55	92.96	98.5	2996.9	3261.12	71	331	926.5	6839	6881	43.92	47.79	1.04	4.85	13.58	100.22	100.84
RLX-incomp_Zt10-B-G135-Map7	Z. tritici Zt10	Zt10	5290	23112	28	1	27	1	74.97	15.79	55	59	68.2	93.1	97.8	856	1349.98	29	57	285	1138	5269	16.18	25.52	0.55	1.08	5.39	21.51	99.6
RLX-incomp_Zt10-B-G144-Map6	Z. tritici Zt10	Zt10	5807	18196	36	1	34	1	79.29	17.05	55.7	61.08	86.45	94.7	97.2	535.18	1007.57	29	49	266.5	688	5784	9.22	17.35	0.5	0.84	4.59	11.85	99.6
RLX-incomp_Zt10-B-G17-Map20	Z. tritici Zt10	Zt10	13529	128827	57	1	34	1	78.91	13.72	55.1	65.5	83.12	90.01	97.9	3789.47	4349.28	21	72	1607	8387	13481	28.01	32.15	0.16	0.53	11.88	61.99	99.65
RLX-incomp_Zt10-B-G199-Map8_reversed	Z. tritici Zt10	Zt10	8284	53212	20	6	20	6	87.24	13.79	55.3	82.3	91.4	97.3	98.8	2660.6	3781.15	35	58	165	8277	8284	32.12	45.64	0.42	0.7	1.99	99.92	100
RLX-incomp_Zt10-B-G212-Map3	Z. tritici Zt10	Zt10	12992	165799	55	1	44	1	93.5	5.57	71.8	94.2	95.25	96.2	97.8	3768.16	3001.02	156	1428	2960.5	6798	12999	29	23.1	1.2	10.99	22.79	52.32	100.05
RLX-incomp_Zt10-B-P1.37-Map20_reversed	Z. tritici Zt10	Zt10	6372	163537	49	21	47	22	87.59	11.09	67.3	75.3	95.8	96.6	97	3479.79	2940.44	37	176	3836	6358	6368	54.61	46.15	0.58	2.76	60.2	99.78	99.94
RLX-incomp_Zt10-B-P16.22-Map10_reversed	Z. tritici Zt10	Zt10	9503	192597	59	13	53	16	91.11	6.69	77.7	84.6	94.8	96.5	98.2	3634.42	4188.61	70	111	594	9455	9500	38.24	44.08	0.74	1.17	6.25	99.49	99.97
RLX-incomp_Zt10-B-P45.42-Map3	Z. tritici Zt10	Zt10	2132	10377	8	3	7	3	86.29	11.14	68.3	75	86.51	96.7	97.7	1482.43	835.69	100	638	2017	2127	2128	69.53	39.2	4.69	29.92	94.61	99.77	99.81
RLX-incomp_Zt10-B-R13-Map20	Z. tritici Zt10	Zt10	8288	139886	37	5	34	6	95.15	2.74	87.6	94.6	96.4	96.9	97.8	4114.29	2980.33	36	1487	3495.5	6636	8283	49.64	35.96	0.43	17.94	42.18	80.07	99.94
RLX-incomp_Zt10-B-R19-Map3	Z. tritici Zt10	Zt10	1495	4943	4	2	4	2	92.23	7.37	81.2	95.1	95.65	96.4	96.4	1235.75	448.81	567	1386	1437.5	1501	1501	82.66	30.02	37.93	92.71	96.15	100.4	100.4
RLX-incomp_Zt10-B-R20-Map3	Z. tritici Zt10	Zt10	1303	3927	4	2	4	2	95.1	1.87	93.6	93.9	94.55	97.7	97.7	981.75	573.18	123	1230	1254	1296	1296	75.35	43.99	9.44	94.4	96.24	99.46	99.46
RLX-incomp_Zt10-B-R200-Map3	Z. tritici Zt10	Zt10	5365	24066	28	2	25	2	76.34	15.5	54.9	65.9	68.4	93	97.8	962.64	1450.68	23	182	293	1132	5380	17.94	27.04	0.43	3.39	5.46	21.1	100.28
RLX-incomp_Zt10-B-R26-Map20	Z. tritici Zt10	Zt10	7020	352253	124	32	111	32	90.49	11.53	55.1	92.2	95.8	96.4	97.5	3174.71	2863.71	23	358	2074	6921	7070	45.22	40.79	0.33	5.1	29.54	98.59	100.71
RLX-incomp_Zt10-B-R28-Map6	Z. tritici Zt10	Zt10	13286	151438	29	4	21	7	76.11	13.56	53.8	68.98	76.9	86.47	98.25	7212.33	5828.77	72	630	9320	13191	13362	54.29	43.87	0.54	4.74	70.15	99.28	100.57
RLX-incomp_Zt10-B-R33-Map20_reversed	Z. tritici Zt10	Zt10	13914	242114	47	8	40	9	92.97	4.78	79.4	93.5	94.8	96.1	96.7	6053.07	5349.16	39	1330	4198.5	10985	13986	43.5	38.44	0.28	9.56	30.17	78.95	100.52
RLX-incomp_Zt10-B-R39-Map3	Z. tritici Zt10	Zt10	7949	28172	17	2	15	2	79.81	14.13	56.4	69.2	73.48	96.2	98.3	1878.13	2884.94	36	118	279	2771	7989	23.63	36.29	0.45	1.48	3.51	34.86	100.5
RLX-incomp_Zt10-B-R59-Map20	Z. tritici Zt10	Zt10	8400	236922	60	17	56	20	89.22	9.3	56.9	87	92.3	96	97.5	4230.82	3626.99	22	456	3683.5	8357	8405	50.37	43.18	0.26	5.43	43.85	99.49	100.06
RLX-incomp_Zt10-B-R61-Map4_reversed	Z. tritici Zt10	Zt10	1270	23282	29	12	29	12	77.01	7.01	69.2	72.3	75.3	81.3	99.6	802.83	548.18	39	167	1180	1269	1356	63.21	43.16	3.07	13.15	92.91	99.92	106.77
DHX-incomp_Zt10-B-G208-Map3	Z. tritici Zt10	Zt10	11147	20288	21	1	20	1	78.06	11.14	64.6	68.3	73.1	86.7	97.6	1014.4	2502.49	44	131	223	736	11244	9.1	22.45	0.39	1.18	2	6.6	100.87
DHX-incomp_Zt10-B-G210-Map3_reversed	Z. tritici Zt10	Zt10	14635	63359	31	3	31	3	85.81	10.76	57.5	79.4	88.7	93.5	98.6	2043.84	4572.57	40	95	136	395	14693	13.97	31.24	0.27	0.65	0.93	2.7	100.4
DHX-incomp_Zt10-B-R210-Map5	Z. tritici Zt10	Zt10	4299	27698	19	4	16	5	78.16	12.51	59.1	69.1	70.1	91.2	95.9	1731.12	1838.49	44	395	648	4275	4308	40.27	42.77	1.02	9.19	15.07	99.44	100.21
DHX-incomp_Zt10-B-R229-Map3	Z. tritici Zt10	Zt10	2106	9436	18	2	18	2	78.08	8.1	68.4	70.6	78.05	79.3	97.8	524.22	602.29	25	177	366.5	557	2122	24.89	28.6	1.19	8.4	17.4	26.45	100.76
DHX-incomp_Zt10-B-R298-Map5	Z. tritici Zt10	Zt10	8542	51034	27	2	27	2	83.87	11.11	67.5	71.8	87.6	94.3	97.7	1890.15	2957.87	21	57	208	4247	8577	22.13	34.63	0.25	0.67	2.44	49.72	100.41
DHX-incomp_Zt10-B-R311-Map4	Z. tritici Zt10	Zt10	8499	46389	36	5	34	5	82.17	12.08	60.1	70	86.6	91.6	97.1	1364.38	2984.66	27	93	132	295	8495	16.05	35.12	0.32	1.09	1.55	3.47	99.95
DMX-incomp_Zt10-B-R321-Map9	Z. tritici Zt10	Zt10	11895	63132	27	3	24	3	85.17	10.61	68.9	76.8	84.15	96.7	98.9	2630.5	4059.23	26	113	683	3648	11926	22.11	34.13	0.22	0.95	5.74	30.67	100.26
DMX-incomp_Zt10-B-R42-Map20	Z. tritici Zt10	Zt10	13796	246077	70	9	64	9	86.07	11.41	60.2	74.7	89.67	96.9	100	3844.98	5156.02	52	138	405.5	7295	14020	27.87	37.37	0.38	1	2.94	52.88	101.62
DYX-incomp_Zt10-B-R140-Map4	Z. tritici Zt10	Zt10	4412	28627	14	4	11	6	83.22	11.39	66.78	76	78.33	91.9	99.2	2602.45	2104.06	37	403	4366	4414	4458	58.99	47.69	0.84	9.13	98.96	100.05	101.04
DXX-MITE_Zt10-B-G231-Map6	Z. tritici Zt10	Zt10	348	9105	42	13	42	13	84.29	6.96	76.3	78.9	82.6	85.7	100	216.79	97.43	68	137	188.5	335	362	62.29	28	19.54	39.37	54.17	96.26	104.02
DXX-MITE_Zt10-B-G233-Map5	Z. tritici Zt10	Zt10	361	2494	7	6	7	6	96.06	7.27	79.7	96.9	98.9	99.4	99.7	356.29	6.52	342	356	359	360	361	98.69	1.81	94.74	98.61	99.45	99.72	100
DXX-MITE_Zt10-B-G239-Map3	Z. tritici Zt10	Zt10	415	6952	18	12	17	13	79.48	10.59	61.8	72.5	76.11	82.7	99.8	408.94	14.32	388	401	412	416	436	98.54	3.45	93.49	96.63	99.28	100.24	105.06
DXX-MITE_Zt10-B-G248-Map4	Z. tritici Zt10	Zt10	493	3628	9	7	9	7	88.27	8.8	78.2	79.5	89.5	96.5	98.2	403.11	173.16	38	475	489	493	502	81.77	35.12	7.71	96.35	99.19	100	101.83
DXX-MITE_Zt10-B-G250-Map3	Z. tritici Zt10	Zt10	499	2696	6	5	6	5	88.82	11.19	73.2	81.6	90.25	98.4	99.2	449.33	107.59	230	483	493.5	498	498	90.05	21.56	46.09	96.79	98.9	99.8	99.8
DXX-MITE_Zt10-B-G257-Map3	Z. tritici Zt10	Zt10	488	1999	5	4	5	4	93.06	9.1	81	85.5	99.2	99.6	100	399.8	191.66	57	480	486	488	488	81.93	39.27	11.68	98.36	99.59	100	100
DXX-MITE_Zt10-B-G292-Map3	Z. tritici Zt10	Zt10	675	2598	10	3	10	3	88.76	11.5	62.7	84	90.65	99.1	99.5	259.8	292.64	26	49	79	673	675	38.49	43.35	3.85	7.26	11.7	99.7	100
DXX-MITE_Zt10-B-P46.43-Map4	Z. tritici Zt10	Zt10	405	2089	6	5	6	5	94.22	6.71	84.8	86.7	97.5	99.3	99.5	348.17	138.78	65	402	403	403	413	85.97	34.27	16.05	99.26	99.51	99.51	101.98
DXX-MITE_Zt10-B-R130-Map4	Z. tritici Zt10	Zt10	459	2911	11	4	11	4	89.44	7.75	77.1	83.3	87	98.9	99.6	264.64	163.63	90	132	155	458	459	57.65	35.65	19.61	28.76	33.77	99.78	100
DXX-MITE_Zt10-B-R348-Map3	Z. tritici Zt10	Zt10	528	2079	7	2	7	2	89.7	10.01	71.7	81.2	93.1	97	99.2	297	198	69	102	273	528	528	56.25	37.5	13.07	19.32	51.7	100	100
DTX-comp_Zt10-B-G42-Map4	Z. tritici Zt10	Zt10	2984	29211	24	7	21	8	90.03	6.61	79.4	85.4	89.9	96.8	98	1391	1378.76	32	48	1257	2981	3017	46.62	46.2	1.07	1.61	42.12	99.9	101.11
DTX-comp_Zt10-B-G52-Map6	Z. tritici Zt10	Zt10	3214	23190	19	4	18	5	78.11	12.19	63	70.2	74.5	91	98.8	1288.33	1445.33	35	90	192.5	3076	3290	40.09	44.97	1.09	2.8	5.99	95.71	102.36
DTX-comp_Zt10-B-G60-Map20	Z. tritici Zt10	Zt10	3284	33118	18	7	16	8	92.49	8.37	71.3	93.9	95.8	97.2	98.1	2069.88	1361.54	40	1164	2600.5	3275	3300	63.03	41.46	1.22	35.44	79.19	99.73	100.49
DTX-comp_Zt10-B-R125-Map8_reversed	Z. tritici Zt10	Zt10	3297	25532	15	4	14	4	84.86	11.88	68.3	72.5	82.25	97	98	1824.43	1424.08	58	190	1972	3287	3324	55.34	43.19	1.76	5.76	59.81	99.7	100.82
DTX-comp_Zt10-B-R156-Map5_reversed	Z. tritici Zt10	Zt10	3275	11700	7	3	7	3	89.43	9.24	74.8	81	94.3	96.2	99	1671.43	1557.56	72	182	1429	3262	3293	51.04	47.56	2.2	5.56	43.63	99.6	100.55
DTX-comp_Zt10-B-R188-Map4	Z. tritici Zt10	Zt10	2190	12416	12	4	11	5	86.32	10.51	70.4	75.8	86.4	97	98.1	1128.73	1063.17	43	49	1085	2190	2220	51.54	48.55	1.96	2.24	49.54	100	101.37
DTX-comp_Zt10-B-R190-Map8	Z. tritici Zt10	Zt10	3454	37672	35	1	32	1	78.55	11.97	60.9	70	73.05	93.9	99.1	1177.25	1022.89	21	163	998.5	2184	3454	34.08	29.61	0.61	4.72	28.91	63.23	100
DTX-comp_Zt10-B-R199-Map4_reversed	Z. tritici Zt10	Zt10	2209	23394	17	9	17	9	82.8	10.63	64.8	75.8	78.3	91.6	97.1	1376.12	999.2	35	176	2124	2200	2207	62.3	45.23	1.58	7.97	96.15	99.59	99.91
DTX-comp_Zt10-B-R201-Map3_reversed	Z. tritici Zt10	Zt10	4509	27424	14	3	11	4	89.45	8.55	70.51	86.8	91.6	94.2	98.3	2493.09	2123.08	38	279	3944	4471	4508	55.29	47.09	0.84	6.19	87.47	99.16	99.98
DTX-comp_Zt10-B-R49-Map8_reversed	Z. tritici Zt10	Zt10	2175	20275	19	6	17	6	84.57	10.46	72.2	74	82.8	96.2	98	1192.65	917.15	99	207	1176	2163	2202	54.83	42.17	4.55	9.52	54.07	99.45	101.24
DTX-comp_Zt10-B-R51-Map6	Z. tritici Zt10	Zt10	3533	27846	16	4	14	5	85.56	9.33	68.9	79.5	85.1	95.2	97.2	1989	1587.34	51	155	2133	3547	3742	56.3	44.93	1.44	4.39	60.37	100.4	105.92
DTX-comp_Zt10-B-R52-Map3	Z. tritici Zt10	Zt10	4299	18604	8	2	8	2	83.24	11.19	69.6	77	80.65	97.9	98	2325.5	1908.49	32	508	2630	4300	4300	54.09	44.39	0.74	11.82	61.18	100.02	100.02
DTX-incomp_Zt10-B-G101-Map5	Z. tritici Zt10	Zt10	4005	12910	14	2	13	3	80.36	10.15	68.8	74.1	77	79.2	98.4	993.08	1718.19	42	44	125	203	4008	24.8	42.9	1.05	1.1	3.12	5.07	100.07
DTX-incomp_Zt10-B-G155-Map7	Z. tritici Zt10	Zt10	5372	43551	13	7	12	8	90.77	9.99	73	82	97.2	97.6	97.8	3629.25	2526.97	49	553	5327.5	5343	5353	67.56	47.04	0.91	10.29	99.17	99.46	99.65
DTX-incomp_Zt10-B-G318-Map3_reversed	Z. tritici Zt10	Zt10	1104	2549	7	1	7	1	82.7	14.43	68.6	69.7	75.3	98.2	99.3	364.14	356.27	49	134	256	426	1104	32.98	32.27	4.44	12.14	23.19	38.59	100
DTX-incomp_Zt10-B-G338-Map4_reversed	Z. tritici Zt10	Zt10	1346	6670	5	5	5	5	93.3	9.29	76.7	96.8	97.1	97.8	98.1	1334	8.8	1323	1330	1332	1339	1346	99.11	0.65	98.29	98.81	98.96	99.48	100
DTX-incomp_Zt10-B-G447-Map3	Z. tritici Zt10	Zt10	2693	16154	13	3	13	3	78.78	13.28	59	70.5	77.7	86.1	98.8	1242.62	1145.2	22	135	490	2369	2697	46.14	42.52	0.82	5.01	18.2	87.97	100.15
DTX-incomp_Zt10-B-P18.20-Map3_reversed	Z. tritici Zt10	Zt10	3432	17329	11	3	10	4	88.15	9.22	72.9	78.9	92.34	95.3	100	1733.5	1569	84	125	1657	3371	3432	50.51	45.72	2.45	3.64	48.28	98.22	100
DTX-incomp_Zt10-B-P32.8-Map3	Z. tritici Zt10	Zt10	872	5942	21	3	16	3	87.53	10	72.8	77.41	88.6	97.7	98.7	371.38	299.1	65	143	265.5	750	875	42.59	34.3	7.45	16.4	30.45	86.01	100.34
DTX-incomp_Zt10-B-P38.3-Map3	Z. tritici Zt10	Zt10	2843	15352	13	3	12	3	81.26	11.62	59.4	75.77	81.9	90.8	100	1280.33	1101.77	22	640	781.5	2843	2867	45.03	38.75	0.77	22.51	27.49	100	100.84
DTX-incomp_Zt10-B-P55.52-Map3	Z. tritici Zt10	Zt10	4202	41561	32	6	32	6	83.47	10.69	67	74.3	81.45	96	97.6	1298.78	1609.86	23	152	429.5	2955	4199	30.91	38.31	0.55	3.62	10.22	70.32	99.93
DTX-incomp_Zt10-B-P9.29-Map4	Z. tritici Zt10	Zt10	3622	50955	36	6	32	9	84.43	8.18	70.8	78.1	83.05	92.1	100	1592.34	1667.71	28	98	305.5	3612	3848	43.96	46.04	0.77	2.71	8.43	99.72	106.24
DTX-incomp_Zt10-B-R11-Map6	Z. tritici Zt10	Zt10	3457	20954	13	3	12	4	87.84	10.96	72.5	76.2	90.95	97.8	98.1	1746.17	1418.7	90	134	1729.5	3374	3457	50.51	41.04	2.6	3.88	50.03	97.6	100
DTX-incomp_Zt10-B-R12-Map9	Z. tritici Zt10	Zt10	5475	29383	22	4	22	4	91.26	7.76	70.9	88.2	93.3	96.9	100	1335.59	2187.72	24	31	44	1094	5466	24.39	39.96	0.44	0.57	0.8	19.98	99.84
DTX-incomp_Zt10-B-R122-Map4	Z. tritici Zt10	Zt10	1400	12523	14	5	14	5	82.67	9.8	68.5	73.4	82	92.8	95.1	894.5	507.7	97	295	1086.5	1396	1400	63.89	36.26	6.93	21.07	77.61	99.71	100
DTX-incomp_Zt10-B-R129-Map3	Z. tritici Zt10	Zt10	4093	21606	24	3	22	3	82.13	8.7	69.3	75.9	78.7	91.2	97.2	982.32	1656.82	28	73	122	196	4123	24	40.48	0.68	1.78	2.98	4.79	100.73
DTX-incomp_Zt10-B-R135-Map6	Z. tritici Zt10	Zt10	5409	18313	4	3	4	3	95.1	5.27	87.2	97.6	97.7	97.8	97.8	4578.25	1702.27	2025	5407	5417.5	5453	5453	84.64	31.47	37.44	99.96	100.16	100.81	100.81
DTX-incomp_Zt10-B-R141-Map7	Z. tritici Zt10	Zt10	5397	37680	13	4	12	4	89.42	7.52	72.2	85.5	90.65	97.7	98.2	3140	2032.93	74	1739	3340.5	5363	5462	58.18	37.67	1.37	32.22	61.9	99.37	101.2
DTX-incomp_Zt10-B-R16-Map15	Z. tritici Zt10	Zt10	4025	49662	46	5	42	5	86.09	9.12	70.7	77.57	85.8	96.5	97.8	1182.43	1430.97	37	146	494.5	1724	4238	29.38	35.55	0.92	3.63	12.29	42.83	105.29
DTX-incomp_Zt10-B-R161-Map3	Z. tritici Zt10	Zt10	3599	14791	8	3	7	3	87.95	15.42	61.2	70.27	96.3	97.3	97.8	2113	1541.57	34	393	2160	3589	3597	58.71	42.83	0.94	10.92	60.02	99.72	99.94
DTX-incomp_Zt10-B-R170-Map3	Z. tritici Zt10	Zt10	2908	4658	13	1	12	1	83.9	9.07	73	77.2	83	92.1	98	388.17	804.63	26	66	134	347	2916	13.35	27.67	0.89	2.27	4.61	11.93	100.28
DTX-incomp_Zt10-B-R183-Map9_reversed	Z. tritici Zt10	Zt10	10346	54243	23	1	23	1	85.67	8.5	71.1	79.3	83	95.8	98.1	2358.39	3158.81	67	88	1299	2061	10275	22.8	30.53	0.65	0.85	12.56	19.92	99.31
DTX-incomp_Zt10-B-R198-Map3_reversed	Z. tritici Zt10	Zt10	1695	7539	11	3	11	3	88.36	9.59	67.5	84.2	90.2	94.3	98	685.36	762.69	32	35	214	1695	1713	40.43	45	1.89	2.06	12.63	100	101.06
DTX-incomp_Zt10-B-R21-Map11	Z. tritici Zt10	Zt10	5518	93122	27	13	25	14	92.12	5.84	71.7	89.6	93.1	96.4	98	3725.48	2351.12	28	1276	5330	5394	5624	67.52	42.61	0.51	23.12	96.59	97.75	101.92
DTX-incomp_Zt10-B-R226-Map11	Z. tritici Zt10	Zt10	4083	32856	18	4	17	5	85.89	9.02	74.3	79.1	80.7	96.2	97.7	1932.71	1770.39	48	136	1375	4058	4093	47.34	43.36	1.18	3.33	33.68	99.39	100.24
DTX-incomp_Zt10-B-R236-Map11	Z. tritici Zt10	Zt10	2948	42092	24	7	21	9	84.94	12.22	66.9	69.6	86.85	95.9	98.1	2004.38	992.03	123	1385	2263	2913	2950	67.99	33.65	4.17	46.98	76.76	98.81	100.07
DTX-incomp_Zt10-B-R239-Map9	Z. tritici Zt10	Zt10	3561	19030	15	3	15	3	89.1	10.52	66.5	86.2	94.5	96.4	97.2	1268.67	1360.37	35	215	777	2693	3532	35.63	38.2	0.98	6.04	21.82	75.62	99.19
DTX-incomp_Zt10-B-R241-Map3	Z. tritici Zt10	Zt10	3626	39625	23	3	20	3	74.2	8.81	64.7	69.3	71.41	78.5	97.5	1981.7	1344.52	59	973	2439.5	3274	3626	54.65	37.08	1.63	26.83	67.28	90.29	100
DTX-incomp_Zt10-B-R246-Map6_reversed	Z. tritici Zt10	Zt10	3546	10967	8	2	8	2	84.35	11.29	68.6	79.7	83	96.8	97.4	1370.88	1781.64	21	69	146	3524	3683	38.66	50.24	0.59	1.95	4.12	99.38	103.86
DTX-incomp_Zt10-B-R25-Map9	Z. tritici Zt10	Zt10	5428	38565	18	6	18	6	88.91	7.85	78.2	82.5	87.05	96.8	98.1	2142.5	2543.14	22	82	193	5354	5392	39.47	46.85	0.41	1.51	3.56	98.64	99.34
DTX-incomp_Zt10-B-R256-Map6	Z. tritici Zt10	Zt10	3794	45374	31	7	27	9	83.17	7.65	70.9	77.68	79.95	90.5	98.4	1680.52	1736.72	29	115	298	3762	3858	44.29	45.78	0.76	3.03	7.85	99.16	101.69
DTX-incomp_Zt10-B-R267-Map3	Z. tritici Zt10	Zt10	1843	7957	6	4	6	4	84.88	14.01	68	70.9	87.2	97.2	98.8	1326.17	804.97	247	328	1842.5	1843	1854	71.96	43.68	13.4	17.8	99.97	100	100.6
DTX-incomp_Zt10-B-R302-Map4	Z. tritici Zt10	Zt10	5363	15600	5	2	5	2	92.38	8.29	78.4	91.1	97.1	97.6	97.7	3120	2694.97	72	323	4463	5361	5381	58.18	50.25	1.34	6.02	83.22	99.96	100.34
DTX-incomp_Zt10-B-R305-Map7	Z. tritici Zt10	Zt10	5375	27085	11	3	11	3	95.46	4.17	86.5	92.9	97.4	98	98.9	2462.27	2381.11	35	42	2287	5169	5482	45.81	44.3	0.65	0.78	42.55	96.17	101.99
DTX-incomp_Zt10-B-R308-Map4	Z. tritici Zt10	Zt10	1672	5026	4	3	4	3	93.1	4.75	86	95	95.3	95.8	95.8	1256.5	815	34	1664	1664	1664	1664	75.15	48.74	2.03	99.52	99.52	99.52	99.52
DTX-incomp_Zt10-B-R38-Map3	Z. tritici Zt10	Zt10	3172	39832	42	9	38	11	81.33	5.38	74.2	78.3	79.65	83.1	98.2	1048.21	1422.68	35	72	89	3112	3238	33.05	44.85	1.1	2.27	2.81	98.11	102.08
DTX-incomp_Zt10-B-R57-Map6	Z. tritici Zt10	Zt10	3455	15227	7	2	7	2	92.47	10.25	69.4	93.6	96.5	97.2	97.4	2175.29	1104.87	808	821	2539	3342	3450	62.96	31.98	23.39	23.76	73.49	96.73	99.86
DTX-incomp_Zt10-B-R65-Map20	Z. tritici Zt10	Zt10	5577	93237	33	8	28	11	91.72	6.45	75.2	89.47	91.15	97.7	98.6	3329.89	2272.66	52	766	4719	5459	5817	59.71	40.75	0.93	13.73	84.62	97.88	104.3
DTX-incomp_Zt10-B-R79-Map3_reversed	Z. tritici Zt10	Zt10	2199	23640	28	6	20	9	80.19	9.72	66.9	71.2	80.25	90	97.2	1182	1031.28	28	149	1272.5	2202	2225	53.75	46.9	1.27	6.78	57.87	100.14	101.18
DTX-incomp_Zt10-B-R91-Map10	Z. tritici Zt10	Zt10	4242	11434	11	1	10	1	83.36	7.84	74.3	76.9	83.3	86	96.7	1143.4	1660.45	58	72	212.5	2175	4241	26.95	39.14	1.37	1.7	5.01	51.27	99.98
noCat_Zt10-B-G85-Map20	Z. tritici Zt10	Zt10	5245	10486	12	1	12	1	90.64	6.21	77.5	85.1	93.7	95.3	95.7	873.83	1559.47	24	70	250	1641	5309	16.66	29.73	0.46	1.33	4.77	31.29	101.22
noCat_Zt10-B-R132-Map15	Z. tritici Zt10	Zt10	821	28969	39	12	39	12	91.94	3.19	85.1	89.4	91.9	94.8	97.1	742.79	112.9	176	691	772	800	894	90.47	13.75	21.44	84.17	94.03	97.44	108.89
noCat_Zt10-B-R244-Map14	Z. tritici Zt10	Zt10	818	24482	32	15	32	15	92.14	2.5	83.8	90.7	92.25	93.9	96.1	765.06	145.49	28	754	782.5	809	991	93.53	17.79	3.42	92.18	95.66	98.9	121.15
noCat_Zt10-B-R90-Map11	Z. tritici Zt10	Zt10	7074	32178	25	2	25	2	89.64	7.85	70	82.1	93.4	96.3	100	1287.12	2306.22	25	51	64	789	7085	18.2	32.6	0.35	0.72	0.9	11.15	100.16
RXX-TRIM_Zt1A5-B-G391-Map13	Z. tritici Zt1A5	Zt1A5	1134	10928	22	5	20	5	92.01	8.29	75.3	91.5	96.3	97.5	100	546.4	454.8	30	112	372	1080	1119	48.18	40.11	2.65	9.88	32.8	95.24	98.68
RXX-TRIM_Zt1A5-B-G454-Map8	Z. tritici Zt1A5	Zt1A5	1287	8816	17	2	16	2	90.48	6.95	77.59	86.7	90.95	97.6	99.5	551	392.54	79	268	508.5	656	1271	42.81	30.5	6.14	20.82	39.51	50.97	98.76
RIX-comp_Zt1A5-B-G188-Map20_reversed	Z. tritici Zt1A5	Zt1A5	5127	120524	28	25	28	25	95.04	7.97	66.7	97.1	97.25	97.5	97.8	4669.11	1339.36	330	5106	5111	5117	5133	91.07	26.12	6.44	99.59	99.69	99.8	100.12
RIX-comp_Zt1A5-B-G19-Map20_reversed	Z. tritici Zt1A5	Zt1A5	9911	147237	71	1	61	3	90.4	6.45	78.6	83.5	94.5	95.7	96.8	2413.72	2482.11	23	282	1385	3797	10093	24.35	25.04	0.23	2.85	13.97	38.31	101.84
RIX-comp_Zt1A5-B-G208-Map4	Z. tritici Zt1A5	Zt1A5	6665	9239	4	1	4	1	87.75	13.4	67.7	93.5	93.85	95.6	95.6	2309.75	2928.01	310	1118	1133	6663	6663	34.65	43.93	4.65	16.77	17	99.97	99.97
RIX-comp_Zt1A5-B-G238-Map5_reversed	Z. tritici Zt1A5	Zt1A5	6358	35241	17	1	16	1	92.97	5.3	73.95	93.6	94.8	95.3	95.9	2202.56	1875.32	71	992	1397.5	4017	6377	34.64	29.5	1.12	15.6	21.98	63.18	100.3
[truncated: 693 more rows]
